# Supplementary material for: Power-law productivity and positive regime shift of symbiotic and climate-resilient edible ecosystems
Source: Research Square preprint supplement (doi:10.21203/rs.3.rs-80005/v1), 2020-12-15
Supplement: Supplementary file 1 [file 237a49ea7a825e0091262dfa.csv]

Method	2015/06	2015/07	2015/08	2015/09	2015/10	2015/11	2015/12	2016/01	2016/02	2016/03	2016/04	2016/05	2016/06	2016/07	2016/08	2016/09	2016/10	2016/11	2016/12	2017/01	2017/02	2017/03	2017/04	2017/05	2017/06	2017/07	2017/08	2017/09	2017/10	2017/11	2017/12	2018/01	2018/02	2018/03	2018/04	2018/05
Synecoculture / 500 m^2	96795	96795	96795	96795	96795	96795	96795	96795	96795	96795	96795	96795	16118	16118	16118	16118	16118	16118	18009	18009	18009	18009	18009	18009	72782	72782	72782	72782	72782	72782	72782	72782	72782	72782	72782	72782
System of rice intensification + trees / 500 m^2	0	0	0	45050	45050	45050	0	0	0	0	0	0	0	0	36622	36622	36622	36622	0	0	0	0	0	0	58680	58680	58680	58680	58680	58680	58680	58680	58680	58680	58680	58680
Conservation agriculture / 500 m^2	0	15271	15271	15271	15271	15271	0	0	0	0	0	0	0	0	14438	14438	14438	14438	0	0	0	0	0	0	0	0	0	16902	16902	16902	16902	0	0	0	0	0
Permaculture / 500 m^2	0	25335	25335	25335	0	0	0	0	0	0	0	0	0	0	15278	15278	15278	15278	0	0	0	0	0	0	0	0	0	16814	16814	16814	16814	0	0	0	0	0
Bio-intensive market gardening / 500 m^2	0	0	0	0	0	0	101178	101178	101178	101178	101178	0	0	0	0	0	0	0	107281	107281	107281	107281	107281	107281	26157	26157	26157	26157	26157	26157	26157	26157	26157	26157	26157	26157
Traditional market gardening / 500 m^2	0	0	0	0	0	0	79833	79833	79833	79833	79833	0	0	0	0	0	0	0	64695	64695	64695	64695	64695	64695	15347	15347	15347	15347	15347	15347	15347	15347	15347	15347	15347	15347
