# Supplementary material for: Power-law productivity and positive regime shift of symbiotic and climate-resilient edible ecosystems
Source: Research Square preprint supplement (doi:10.21203/rs.3.rs-80005/v1), 2020-12-15
Supplement: Supplementary file 2 [file de9d182526040fad7cc11da1.csv]

yyyy.mm.dd	Scientific.name	Unit	Product Sales [JPY]
2011/01/09	Brassica oleracea var. italica	5	1575
2011/01/09	Brassica rapa var. chinensis	5	1575
2011/01/09	Brassica rapa var. pekinensis	5	1575
2011/01/09	Brassica rapa var. perviridis	5	1575
2011/01/09	Citrus hassaku	5	1575
2011/01/09	Citrus junos	5	1575
2011/01/09	Citrus unshiu	5	1575
2011/01/09	Daucus carota subsp. sativus	5	1575
2011/01/09	Raphanus sativus var. longipinnatus	5	1575
2011/01/09	Raphanus sativus var. sativus	5	1575
2011/01/12	Brassica narinosa	15	4725
2011/01/12	Brassica rapa var. chinensis	15	4725
2011/01/12	Brassica rapa var. pekinensis	15	4725
2011/01/12	Brassica rapa var. perviridis	15	4725
2011/01/12	Brassicaceae spp.	15	4725
2011/01/12	Citrus hassaku	15	4725
2011/01/12	Citrus junos	15	4725
2011/01/12	Citrus unshiu	15	4725
2011/01/12	Daucus carota subsp. sativus	15	4725
2011/01/12	Fortunella sp.	15	4725
2011/01/12	Raphanus sativus var. longipinnatus	15	4725
2011/01/16	Brassica narinosa	15	4725
2011/01/16	Brassica oleracea var. italica	15	4725
2011/01/16	Brassica rapa subsp. rapa	15	4725
2011/01/16	Brassica rapa var. chinensis	15	4725
2011/01/16	Brassica rapa var. pekinensis	15	4725
2011/01/16	Brassica rapa var. perviridis	15	4725
2011/01/16	Brassicaceae spp.	15	4725
2011/01/16	Citrus unshiu	15	4725
2011/01/16	Daucus carota subsp. sativus	15	4725
2011/01/16	Raphanus sativus var. longipinnatus	15	4725
2011/07/12	Allium chinense	14	4410
2011/07/12	Allium tuberosum	14	4410
2011/07/12	Aralia cordata	14	4410
2011/07/12	Brassica oleracea var. italica	4.2	1323
2011/07/12	Brassica rapa var. perviridis	14	4410
2011/07/12	Cucumis sativus	4.2	1323
2011/07/12	Daucus carota subsp. sativus	14	4410
2011/07/12	Raphanus sativus var. sativus	4.2	1323
2011/07/12	Solanum lycopersicum var. cerasiforme	4.2	1323
2011/07/12	Solanum melongena	4.2	1323
2011/07/12	Solanum tuberosum	14	4410
2011/07/26	Allium tuberosum	7	2205
2011/07/26	Cucumis sativus	7	2205
2011/07/26	Ipomoea aquatica	7	2205
2011/07/26	Mentha suaveolens	7	2205
2011/07/26	Rosmarinus officinalis	7	2205
2011/07/26	Solanum lycopersicum var. cerasiforme	3.5	1102
2011/07/26	Solanum melongena	7	2205
2011/07/26	Solanum tuberosum	7	2205
2011/08/05	Allium fistulosum	4	1260
2011/08/05	Allium tuberosum	4	1260
2011/08/05	Citrus × limon	4	1260
2011/08/05	Cucumis sativus	4	1260
2011/08/05	Glycine max	4	1260
2011/08/05	Perilla frutescens var. crispa	4	1260
2011/08/05	Rosmarinus officinalis	4	1260
2011/08/05	Solanum melongena	4	1260
2011/08/05	Solanum tuberosum	4	1260
2011/08/08	Abelmoschus esculentus	2	630
2011/08/08	Allium fistulosum	2	630
2011/08/08	Allium tuberosum	2	630
2011/08/08	Citrus × limon	2	630
2011/08/08	Cucumis sativus	2	630
2011/08/08	Glycine max	2	630
2011/08/08	Lactuca sativa	2	630
2011/08/08	Perilla frutescens var. crispa	2	630
2011/08/08	Rosmarinus officinalis	2	630
2011/08/08	Solanum melongena	2	630
2011/08/18	Abelmoschus esculentus	2	630
2011/08/18	Allium fistulosum	2	630
2011/08/18	Allium tuberosum	2	630
2011/08/18	Citrus × limon	2	630
2011/08/18	Cucumis sativus	2	630
2011/08/18	Glycine max	2	630
2011/08/18	Perilla frutescens var. crispa	2	630
2011/08/18	Rosmarinus officinalis	2	630
2011/08/21	Abelmoschus esculentus	2	630
2011/08/21	Allium fistulosum	2	630
2011/08/21	Allium tuberosum	2	630
2011/08/21	Citrus × limon	2	630
2011/08/21	Cucumis sativus	2	630
2011/08/21	Glycine max	2	630
2011/08/21	Perilla frutescens var. crispa	2	630
2011/08/21	Rosmarinus officinalis	2	630
2011/08/21	Solanum tuberosum	2	630
2011/08/26	Abelmoschus esculentus	1	315
2011/08/26	Allium fistulosum	1	315
2011/08/26	Allium tuberosum	1	315
2011/08/26	Cucumis sativus	1	315
2011/08/26	Ipomoea aquatica	1	315
2011/08/26	Ocimum basilicum	1	315
2011/08/26	Perilla frutescens var. crispa	1	315
2011/08/26	Solanum melongena	1	315
2011/09/01	Abelmoschus esculentus	1	315
2011/09/01	Allium fistulosum	1	315
2011/09/01	Allium tuberosum	1	315
2011/09/01	Citrus × limon	1	315
2011/09/01	Corchorus olitorius	1	315
2011/09/01	Cucumis sativus	1	315
2011/09/01	Momordica charantia var. pavel	1	315
2011/09/01	Perilla frutescens var. crispa	1	315
2011/09/01	Solanum melongena	1	315
2011/09/19	Abelmoschus esculentus	1	315
2011/09/19	Allium fistulosum	1	315
2011/09/19	Allium tuberosum	1	315
2011/09/19	Brassica oleracea var. gemmifera	1	315
2011/09/19	Brassica rapa var. chinensis	1	315
2011/09/19	Momordica charantia var. pavel	1	315
2011/09/19	Perilla frutescens var. crispa	1	315
2011/09/19	Raphanus sativus var. longipinnatus	1	315
2011/09/19	Solanum melongena	1	315
2011/09/19	Zingiber mioga	1	315
2011/10/02	Abelmoschus esculentus	6	1890
2011/10/02	Allium fistulosum	6	1890
2011/10/02	Allium tuberosum	6	1890
2011/10/02	Momordica charantia var. pavel	6	1890
2011/10/02	Perilla frutescens var. crispa	6	1890
2011/10/02	Raphanus sativus var. sativus	6	1890
2011/10/02	Rosmarinus officinalis	6	1890
2011/10/02	Solanum melongena	6	1890
2011/10/02	Zingiber mioga	6	1890
2011/10/11	Abelmoschus esculentus	2	630
2011/10/11	Abelmoschus esculentus	2	630
2011/10/11	Allium fistulosum	4	1260
2011/10/11	Allium tuberosum	4	1260
2011/10/11	Lactuca sativa	4	1260
2011/10/11	Momordica charantia var. pavel	3	945
2011/10/11	Raphanus sativus var. sativus	4	1260
2011/10/11	Rosmarinus officinalis	2	630
2011/10/11	Solanum melongena	3	945
2011/10/11	Thinned-out seedlings	2	630
2011/10/11	Zingiber mioga	2	630
2011/10/17	Abelmoschus esculentus	1	315
2011/10/17	Allium fistulosum	1	315
2011/10/17	Allium tuberosum	1	315
2011/10/17	Lactuca sativa	1	315
2011/10/17	Mentha suaveolens	1	315
2011/10/17	Raphanus sativus var. sativus	1	315
2011/10/17	Rosmarinus officinalis	1	315
2011/10/17	Thinned-out seedlings	1	315
2011/10/21	Abelmoschus esculentus	5	1575
2011/10/21	Allium fistulosum	5	1575
2011/10/21	Allium tuberosum	5	1575
2011/10/21	Lactuca sativa	5	1575
2011/10/21	Raphanus sativus var. sativus	5	1575
2011/10/21	Thinned-out seedlings	5	1575
2011/10/22	Abelmoschus esculentus	2	630
2011/10/22	Allium × proliferum	2	630
2011/10/22	Allium tuberosum	2	630
2011/10/22	Lactuca sativa	2	630
2011/10/22	Raphanus sativus var. sativus	2	630
2011/10/22	Thinned-out seedlings	2	630
2011/10/29	Abelmoschus esculentus	5	1575
2011/10/29	Allium × proliferum	5	1575
2011/10/29	Allium fistulosum	5	1575
2011/10/29	Allium tuberosum	5	1575
2011/10/29	Brassica rapa subsp. rapa	5	1575
2011/10/29	Camellia sinensis	5	1575
2011/10/29	Lactuca sativa	5	1575
2011/10/29	Raphanus sativus var. longipinnatus	5	1575
2011/10/29	Raphanus sativus var. sativus	5	1575
2011/10/29	Raphanus sativus var. sativus	5	1575
2011/10/29	Thinned-out seedlings	5	1575
2011/11/04	Allium fistulosum	5	1575
2011/11/04	Allium tuberosum	5	1575
2011/11/04	Brassica rapa var. chinensis	5	1575
2011/11/04	Brassica rapa var. laciniifolia subvar. oblanceolata	5	1575
2011/11/04	Lactuca sativa	5	1575
2011/11/04	Raphanus sativus var. longipinnatus	5	1575
2011/11/04	Raphanus sativus var. sativus	5	1575
2011/11/04	Thinned-out seedlings	5	1575
2011/11/10	Allium fistulosum	6	1890
2011/11/10	Allium tuberosum	6	1890
2011/11/10	Brassica rapa var. chinensis	6	1890
2011/11/10	Brassica rapa var. perviridis	6	1890
2011/11/10	Lactuca sativa	6	1890
2011/11/10	Raphanus sativus var. longipinnatus	6	1890
2011/11/10	Raphanus sativus var. sativus	6	1890
2011/11/10	Thinned-out seedlings	6	1890
2011/11/14	Allium fistulosum	3	945
2011/11/14	Allium tuberosum	3	945
2011/11/14	Brassica rapa var. chinensis	3	945
2011/11/14	Brassica rapa var. perviridis	3	945
2011/11/14	Raphanus sativus var. longipinnatus	3	945
2011/11/14	Raphanus sativus var. sativus	3	945
2011/11/14	Thinned-out seedlings	3	945
2011/11/17	Allium fistulosum	8	2520
2011/11/17	Allium tuberosum	8	2520
2011/11/17	Brassica juncea	8	2520
2011/11/17	Brassica rapa subsp. rapa	8	2520
2011/11/17	Brassica rapa var. chinensis	8	2520
2011/11/17	Brassica rapa var. pekinensis	8	2520
2011/11/17	Brassica rapa var. perviridis	8	2520
2011/11/17	Crassocephalum crepidioides	8	2520
2011/11/17	Raphanus sativus var. longipinnatus	8	2520
2011/11/17	Raphanus sativus var. sativus	8	2520
2011/11/25	Brassica rapa var. chinensis	7	2205
2011/11/25	Brassica rapa var. laciniifolia	7	2205
2011/11/25	Brassica rapa var. perviridis	7	2205
2011/11/25	Brassicaceae spp.	7	2205
2011/11/25	Crassocephalum crepidioides	7	2205
2011/11/25	Lactuca sativa	7	2205
2011/11/25	Raphanus sativus var. longipinnatus	7	2205
2011/11/25	Raphanus sativus var. sativus	7	2205
2011/11/27	Brassica juncea	4	1260
2011/11/27	Brassica rapa var. chinensis	4	1260
2011/11/27	Brassica rapa var. hakabura	4	1260
2011/11/27	Brassica rapa var. perviridis	4	1260
2011/11/27	Daucus carota subsp. sativus	4	1260
2011/11/27	Raphanus sativus var. longipinnatus	4	1260
2011/11/27	Raphanus sativus var. sativus	4	1260
2011/12/02	Brassica rapa var. chinensis	10	3150
2011/12/02	Brassica rapa var. hakabura	10	3150
2011/12/02	Brassica rapa var. laciniifolia	10	3150
2011/12/02	Brassica rapa var. perviridis	10	3150
2011/12/02	Brassicaceae spp.	5	1575
2011/12/02	Crassocephalum crepidioides	10	3150
2011/12/02	Daucus carota subsp. sativus	10	3150
2011/12/02	Lactuca sativa	5	1575
2011/12/02	Raphanus sativus var. longipinnatus	10	3150
2011/12/02	Raphanus sativus var. sativus	10	3150
2011/12/08	Allium fistulosum	10	3150
2011/12/08	Brassica rapa var. perviridis	10	3150
2011/12/08	Daucus carota subsp. sativus	10	3150
2011/12/08	Lactuca sativa	10	3150
2011/12/08	Raphanus sativus var. longipinnatus	10	3150
2011/12/08	Raphanus sativus var. sativus	10	3150
2011/12/08	Thinned-out seedlings	10	3150
2011/12/17	Brassica rapa var. laciniifolia	15	4725
2011/12/17	Brassica rapa var. perviridis	15	4725
2011/12/17	Citrus unshiu	15	4725
2011/12/17	Daucus carota subsp. sativus	15	4725
2011/12/17	Raphanus sativus var. longipinnatus	15	4725
2011/12/17	Raphanus sativus var. sativus	15	4725
2011/12/17	Thinned-out seedlings	15	4725
2011/12/22	Brassica narinosa	11	3465
2011/12/22	Brassica rapa var. chinensis	11	3465
2011/12/22	Brassica rapa var. laciniifolia	11	3465
2011/12/22	Brassica rapa var. perviridis	11	3465
2011/12/22	Citrus unshiu	11	3465
2011/12/22	Daucus carota subsp. sativus	11	3465
2011/12/22	Lactuca sativa	11	3465
2011/12/22	Raphanus sativus var. longipinnatus	11	3465
2011/12/22	Raphanus sativus var. sativus	11	3465
2011/12/22	Thinned-out seedlings	11	3465
2012/01/23	Brassica narinosa	13	4095
2012/01/23	Brassica rapa var. chinensis	13	4095
2012/01/23	Brassica rapa var. pekinensis	13	4095
2012/01/23	Brassica rapa var. perviridis	13	4095
2012/01/23	Brassicaceae spp.	13	4095
2012/01/23	Citrus hassaku	13	4095
2012/01/23	Citrus junos	13	4095
2012/01/23	Citrus unshiu	13	4095
2012/01/23	Daucus carota subsp. sativus	13	4095
2012/01/23	Fortunella sp.	13	4095
2012/01/23	Raphanus sativus var. longipinnatus	13	4095
2012/02/10	Allium chinense	2	630
2012/02/10	Brassica oleracea var. capitata	7	2205
2012/02/10	Brassica oleracea var. italica	7	2205
2012/02/10	Brassica rapa subsp. rapa	7	2205
2012/02/10	Brassica rapa var. pekinensis	7	2205
2012/02/10	Daucus carota subsp. sativus	7	2205
2012/02/10	Other leaf vegetables	7	2205
2012/02/10	Petasites japonicus	6	1890
2012/02/10	Raphanus sativus var. longipinnatus	7	2205
2012/02/16	Allium chinense	13	4095
2012/02/16	Brassica chinensis f. honsaitai	13	4095
2012/02/16	Brassica narinosa	13	4095
2012/02/16	Brassica oleracea var. capitata	13	4095
2012/02/16	Brassica oleracea var. italica	13	4095
2012/02/16	Brassica rapa subsp. rapa	13	4095
2012/02/16	Brassica rapa var. chinensis	13	4095
2012/02/16	Brassica rapa var. pekinensis	13	4095
2012/02/16	Brassica rapa var. perviridis	13	4095
2012/02/16	Citrus × limon	13	4095
2012/02/16	Citrus unshiu	13	4095
2012/02/16	Daucus carota subsp. sativus	13	4095
2012/02/16	Fortunella sp.	13	4095
2012/02/16	Raphanus sativus var. longipinnatus	13	4095
2012/02/20	Allium chinense	5	1575
2012/02/20	Allium fistulosum	5	1575
2012/02/20	Brassica oleracea var. capitata	4	1260
2012/02/20	Brassica rapa subsp. rapa	5	1575
2012/02/20	Brassica rapa var. chinensis	5	1575
2012/02/20	Brassica rapa var. laciniifolia	5	1575
2012/02/20	Brassica rapa var. pekinensis	6	1890
2012/02/20	Brassica rapa var. perviridis	5	1575
2012/02/20	Citrus × limon	5	1575
2012/02/20	Citrus unshiu	5	1575
2012/02/20	Fortunella sp.	5	1575
2012/02/20	Raphanus sativus var. longipinnatus	5	1575
2012/02/23	Brassica oleracea var. capitata	2	630
2012/02/23	Brassica rapa var. laciniifolia	2	630
2012/02/23	Brassica rapa var. pekinensis	2	630
2012/02/23	Citrus × limon	2	630
2012/02/23	Petasites japonicus	2	630
2012/02/23	Raphanus sativus var. longipinnatus	2	630
2012/02/23	Rosmarinus officinalis	2	630
2012/02/27	Brassica rapa var. chinensis	5	1575
2012/02/27	Brassica rapa var. laciniifolia	5	1575
2012/02/27	Brassica rapa var. laciniifolia subvar. oblanceolata	5	1575
2012/02/27	Brassica rapa var. pekinensis	5	1575
2012/02/27	Brassica rapa var. perviridis	5	1575
2012/02/27	Brassicaceae spp.	5	1575
2012/02/27	Citrus unshiu	5	1575
2012/03/05	Allium chinense	13	4095
2012/03/05	Brassica narinosa	6.5	2048
2012/03/05	Brassica oleracea var. gemmifera	13	4095
2012/03/05	Brassica oleracea var. italica	13	4095
2012/03/05	Brassica rapa var. chinensis	6.5	2048
2012/03/05	Brassica rapa var. pekinensis	13	4095
2012/03/05	Brassica rapa var. perviridis	13	4095
2012/03/05	Brassicaceae spp.	13	4095
2012/03/05	Brassicaceae spp.	13	4095
2012/03/05	Camellia sinensis	13	4095
2012/03/05	Daucus carota subsp. sativus	13	4095
2012/03/05	Petasites japonicus	13	4095
2012/03/11	Brassica juncea	3	945
2012/03/11	Brassica oleracea var. italica	20	6300
2012/03/11	Brassica rapa var. laciniifolia	3	945
2012/03/11	Brassica rapa var. nippo-oleifera	3	945
2012/03/11	Brassica rapa var. pekinensis	20	6300
2012/03/11	Brassica rapa var. pekinensis	3	945
2012/03/11	Brassica rapa var. perviridis	20	6300
2012/03/11	Brassica rapa var. perviridis	3	945
2012/03/11	Brassicaceae spp.	20	6300
2012/03/11	Brassicaceae spp.	3	945
2012/03/11	Camellia sinensis	20	6300
2012/03/11	Daucus carota subsp. sativus	3	945
2012/03/11	Petasites japonicus	20	6300
2012/03/11	Petasites japonicus	3	945
2012/03/11	Raphanus sativus var. longipinnatus	3	945
2012/03/11	Raphanus sativus var. sativus	20	6300
2012/03/11	Rosmarinus officinalis	3	945
2012/03/12	Brassica oleracea var. capitata	5	1575
2012/03/12	Brassica oleracea var. capitata	1	315
2012/03/12	Brassica oleracea var. italica	1	315
2012/03/12	Brassica rapa var. chinensis	5	1575
2012/03/12	Brassica rapa var. laciniifolia	1	315
2012/03/12	Brassica rapa var. laciniifolia subvar. oblanceolata	5	1575
2012/03/12	Brassica rapa var. nippo-oleifera	5	1575
2012/03/12	Brassica rapa var. pekinensis	1	315
2012/03/12	Brassica rapa var. perviridis	5	1575
2012/03/12	Brassica rapa var. perviridis	1	315
2012/03/12	Brassicaceae spp.	5	1575
2012/03/12	Brassicaceae spp.	1	315
2012/03/12	Brassicaceae spp.	1	315
2012/03/12	Daucus carota subsp. sativus	5	1575
2012/03/12	Fortunella sp.	5	1575
2012/03/12	Petasites japonicus	5	1575
2012/03/12	Petasites japonicus	1	315
2012/03/12	Raphanus sativus var. longipinnatus	5	1575
2012/04/02	Allium chinense	1	315
2012/04/02	Allium fistulosum	4	1260
2012/04/02	Brassica oleracea cv. Petit Vert	2	630
2012/04/02	Brassica oleracea var. capitata	4	1260
2012/04/02	Brassica oleracea var. capitata	1	315
2012/04/02	Brassica oleracea var. italica	4	1260
2012/04/02	Brassica oleracea var. italica	1	315
2012/04/02	Brassica rapa var. nippo-oleifera	4	1260
2012/04/02	Brassicaceae spp.	2	630
2012/04/02	Daucus carota subsp. sativus	4	1260
2012/04/02	Daucus carota subsp. sativus	1	315
2012/04/02	Fortunella sp.	4	1260
2012/04/02	Rosmarinus officinalis	4	1260
2012/04/02	Solanum lycopersicum	1	315
2012/04/07	Allium chinense	3	945
2012/04/07	Allium fistulosum	3	945
2012/04/07	Brassica juncea cv. Wasabina	3	945
2012/04/07	Brassica oleracea var. capitata	3	945
2012/04/07	Brassica oleracea var. italica	3	945
2012/04/07	Brassica rapa var. nippo-oleifera	3	945
2012/04/07	Daucus carota subsp. sativus	3	945
2012/04/07	Fortunella sp.	3	945
2012/04/12	Allium cepa	1	315
2012/04/12	Allium chinense	1	315
2012/04/12	Allium fistulosum	1	315
2012/04/12	Allium schoenoprasum var. foliosum	4	1260
2012/04/12	Apium graveolens var. dulce	1	315
2012/04/12	Brassica juncea cv. Wasabina	1	315
2012/04/12	Brassica oleracea var. capitata	4	1260
2012/04/12	Brassica oleracea var. capitata	1	315
2012/04/12	Brassica oleracea var. italica	4	1260
2012/04/12	Brassica oleracea var. italica	1	315
2012/04/12	Brassica rapa var. nippo-oleifera	4	1260
2012/04/12	Brassica rapa var. nippo-oleifera	1	315
2012/04/12	Camellia sinensis	4	1260
2012/04/12	Daucus carota subsp. sativus	4	1260
2012/04/12	Daucus carota subsp. sativus	1	315
2012/04/12	Raphanus sativus var. longipinnatus	1	315
2012/05/06	Allium chinense	5	1575
2012/05/06	Allium fistulosum	5	1575
2012/05/06	Allium tuberosum	2.5	788
2012/05/06	Aralia cordata	5	1575
2012/05/06	Daucus carota subsp. sativus	2.5	788
2012/05/06	Petasites japonicus	5	1575
2012/05/06	Pisum sativum	5	1575
2012/05/12	Allium chinense	16	5040
2012/05/12	Aralia cordata	15	4725
2012/05/12	Daucus carota subsp. sativus	16	5040
2012/05/12	Mentha suaveolens	16	5040
2012/05/12	Petasites japonicus	16	5040
2012/05/12	Pisum sativum	16	5040
2012/05/19	Allium chinense	16	5040
2012/05/19	Aralia cordata	16	5040
2012/05/19	Camellia sinensis	2	630
2012/05/19	Daucus carota subsp. sativus	16	5040
2012/05/19	Mentha suaveolens	16	5040
2012/05/19	Petasites japonicus	16	5040
2012/05/19	Pisum sativum	16	5040
2012/05/19	Vicia faba	16	5040
2012/05/27	Allium chinense	7	2205
2012/05/27	Allium tuberosum	7	2205
2012/05/27	Daucus carota subsp. sativus	7	2205
2012/05/27	Lactuca sativa	7	2205
2012/05/27	Mentha suaveolens	7	2205
2012/05/27	Petasites japonicus	7	2205
2012/05/27	Pisum sativum	7	2205
2012/05/27	Rosmarinus officinalis	7	2205
2012/05/27	Vicia faba	7	2205
2012/06/14	Allium chinense	8	2520
2012/06/14	Allium tuberosum	8	2520
2012/06/14	Anethum graveolens	8	2520
2012/06/14	Cucumis sativus	8	2520
2012/06/14	Daucus carota subsp. sativus	8	2520
2012/06/14	Lactuca sativa	8	2520
2012/06/14	Mentha suaveolens	8	2520
2012/06/14	Petasites japonicus	8	2520
2012/06/14	Petroselinum neapolitanum	8	2520
2012/06/14	Phaseolus vulgaris	8	2520
2012/06/14	Raphanus sativus var. sativus	8	2520
2012/06/14	Rosmarinus officinalis	8	2520
2012/06/14	Solanum tuberosum	8	2520
2012/06/18	Allium chinense	7	2205
2012/06/18	Allium sativum	7	2205
2012/06/18	Allium tuberosum	7	2205
2012/06/18	Anethum graveolens	7	2205
2012/06/18	Cucumis sativus	3.5	1102
2012/06/18	Daucus carota subsp. sativus	7	2205
2012/06/18	Lactuca sativa	7	2205
2012/06/18	Mentha suaveolens	7	2205
2012/06/18	Petasites japonicus	7	2205
2012/06/18	Petroselinum neapolitanum	7	2205
2012/06/18	Phaseolus vulgaris	3.5	1102
2012/06/18	Rosmarinus officinalis	7	2205
2012/06/18	Solanum lycopersicum	7	2205
2012/06/18	Solanum tuberosum	7	2205
2012/06/24	Allium chinense	1	315
2012/06/24	Allium sativum	1	315
2012/06/24	Allium tuberosum	1	315
2012/06/24	Anethum graveolens	1	315
2012/06/24	Cucumis sativus	1	315
2012/06/24	Daucus carota subsp. sativus	1	315
2012/06/24	Lactuca sativa	1	315
2012/06/24	Mentha suaveolens	1	315
2012/06/24	Petasites japonicus	1	315
2012/06/24	Petroselinum neapolitanum	1	315
2012/06/24	Rosmarinus officinalis	1	315
2012/06/24	Solanum lycopersicum	1	315
2012/06/24	Solanum tuberosum	1	315
2012/06/25	Allium cepa	8	2520
2012/06/25	Allium chinense	8	2520
2012/06/25	Allium sativum	8	2520
2012/06/25	Allium tuberosum	8	2520
2012/06/25	Anethum graveolens	8	2520
2012/06/25	Cucumis sativus	8	2520
2012/06/25	Daucus carota subsp. sativus	8	2520
2012/06/25	Mentha suaveolens	8	2520
2012/06/25	Petasites japonicus	8	2520
2012/06/25	Petroselinum neapolitanum	8	2520
2012/06/25	Phaseolus vulgaris	8	2520
2012/06/25	Raphanus sativus var. sativus	8	2520
2012/06/25	Rosmarinus officinalis	8	2520
2012/06/25	Solanum lycopersicum	8	2520
2012/06/25	Solanum tuberosum	8	2520
2012/07/02	Allium chinense	16	5040
2012/07/02	Allium sativum	16	5040
2012/07/02	Allium tuberosum	16	5040
2012/07/02	Anethum graveolens	16	5040
2012/07/02	Capsicum annuum var. grossum	5.3	1680
2012/07/02	Cucumis sativus	5.3	1680
2012/07/02	Daucus carota subsp. sativus	16	5040
2012/07/02	Lactuca sativa	16	5040
2012/07/02	Mentha suaveolens	16	5040
2012/07/02	Petasites japonicus	16	5040
2012/07/02	Petroselinum neapolitanum	16	5040
2012/07/02	Phaseolus vulgaris	5.3	1680
2012/07/02	Rosmarinus officinalis	30	9450
2012/07/02	Solanum lycopersicum	16	5040
2012/07/02	Solanum tuberosum	16	5040
2012/07/15	Allium chinense	10	3150
2012/07/15	Allium tuberosum	10	3150
2012/07/15	Cucumis sativus	10	3150
2012/07/15	Daucus carota subsp. sativus	10	3150
2012/07/15	Mentha suaveolens	10	3150
2012/07/15	Perilla frutescens var. crispa	10	3150
2012/07/15	Petasites japonicus	10	3150
2012/07/15	Petroselinum neapolitanum	10	3150
2012/07/15	Raphanus sativus var. sativus	10	3150
2012/07/15	Rosmarinus officinalis	10	3150
2012/07/15	Solanum lycopersicum	10	3150
2012/07/15	Solanum tuberosum	10	3150
2012/07/16	Allium chinense	13	4095
2012/07/16	Allium tuberosum	13	4095
2012/07/16	Cucumis sativus	6.5	2048
2012/07/16	Daucus carota subsp. sativus	13	4095
2012/07/16	Mentha suaveolens	13	4095
2012/07/16	Perilla frutescens var. crispa	13	4095
2012/07/16	Petasites japonicus	13	4095
2012/07/16	Petroselinum neapolitanum	13	4095
2012/07/16	Phaseolus vulgaris	6.5	2048
2012/07/16	Raphanus sativus var. sativus	13	4095
2012/07/16	Rosmarinus officinalis	13	4095
2012/07/16	Solanum lycopersicum	13	4095
2012/07/16	Solanum tuberosum	13	4095
2012/07/21	Allium chinense	10	3150
2012/07/21	Allium tuberosum	10	3150
2012/07/21	Cucumis sativus	10	3150
2012/07/21	Mentha suaveolens	10	3150
2012/07/21	Perilla frutescens var. crispa	10	3150
2012/07/21	Petasites japonicus	10	3150
2012/07/21	Petroselinum neapolitanum	10	3150
2012/07/21	Rosmarinus officinalis	10	3150
2012/07/21	Solanum lycopersicum	10	3150
2012/07/21	Solanum melongena	10	3150
2012/07/21	Solanum tuberosum	10	3150
2012/07/21	Zingiber mioga	10	3150
2012/07/24	Allium chinense	4	1260
2012/07/24	Allium fistulosum	4	1260
2012/07/24	Allium tuberosum	4	1260
2012/07/24	Cucumis sativus	4	1260
2012/07/24	Perilla frutescens var. crispa	4	1260
2012/07/24	Petasites japonicus	4	1260
2012/07/24	Solanum lycopersicum	4	1260
2012/07/24	Solanum tuberosum	4	1260
2012/07/28	Allium chinense	5	1575
2012/07/28	Allium tuberosum	5	1575
2012/07/28	Anethum graveolens	5	1575
2012/07/28	Cucumis sativus	5	1575
2012/07/28	Mentha suaveolens	5	1575
2012/07/28	Perilla frutescens var. crispa	5	1575
2012/07/28	Petasites japonicus	5	1575
2012/07/28	Petroselinum neapolitanum	5	1575
2012/07/28	Rosmarinus officinalis	5	1575
2012/07/28	Solanum lycopersicum	5	1575
2012/07/28	Solanum tuberosum	5	1575
2012/07/28	Zingiber mioga	5	1575
2012/07/29	Allium chinense	1	315
2012/07/29	Allium tuberosum	1	315
2012/07/29	Anethum graveolens	1	315
2012/07/29	Cucumis sativus	1	315
2012/07/29	Mentha suaveolens	1	315
2012/07/29	Perilla frutescens var. crispa	1	315
2012/07/29	Petasites japonicus	1	315
2012/07/29	Petroselinum neapolitanum	1	315
2012/07/29	Rosmarinus officinalis	1	315
2012/07/29	Solanum lycopersicum	1	315
2012/07/29	Solanum tuberosum	1	315
2012/07/29	Zingiber mioga	1	315
2012/08/06	Abelmoschus esculentus	6	1890
2012/08/06	Capsicum annuum var. grossum	6	1890
2012/08/06	Cucumis sativus	6	1890
2012/08/06	Daucus carota subsp. sativus	6	1890
2012/08/06	Glycine max	6	1890
2012/08/06	Mentha suaveolens	6	1890
2012/08/06	Perilla frutescens var. crispa	6	1890
2012/08/06	Petroselinum neapolitanum	6	1890
2012/08/06	Rosmarinus officinalis	6	1890
2012/08/06	Solanum lycopersicum	6	1890
2012/08/06	Solanum melongena	6	1890
2012/08/06	Vigna unguiculata	6	1890
2012/08/06	Zingiber mioga	6	1890
2012/08/11	Allium tuberosum	4	1260
2012/08/11	Citrus × limon	4	1260
2012/08/11	Cucumis sativus	4	1260
2012/08/11	Glycine max	4	1260
2012/08/11	Mentha suaveolens	4	1260
2012/08/11	Ocimum basilicum	4	1260
2012/08/11	Perilla frutescens var. crispa	4	1260
2012/08/11	Petroselinum neapolitanum	4	1260
2012/08/11	Rosmarinus officinalis	4	1260
2012/08/11	Solanum lycopersicum	4	1260
2012/08/11	Vigna unguiculata	4	1260
2012/08/18	Allium tuberosum	4	1260
2012/08/18	Citrus × limon	4	1260
2012/08/18	Cucumis sativus	4	1260
2012/08/18	Glycine max	4	1260
2012/08/18	Mentha suaveolens	4	1260
2012/08/18	Ocimum basilicum	4	1260
2012/08/18	Perilla frutescens var. crispa	4	1260
2012/08/18	Petroselinum neapolitanum	4	1260
2012/08/18	Rosmarinus officinalis	4	1260
2012/08/18	Solanum lycopersicum	4	1260
2012/08/18	Vigna unguiculata	4	1260
2012/09/07	Processed products	18	5670
2012/09/27	Allium fistulosum	1	315
2012/09/27	Allium tuberosum	1	315
2012/09/27	Camellia sinensis	1	315
2012/09/27	Cucumis sativus	1	315
2012/09/27	Perilla frutescens var. crispa	1	315
2012/09/27	Vigna unguiculata	1	315
2012/10/15	Allium fistulosum	2	630
2012/10/15	Allium tuberosum	2	630
2012/10/15	Anethum graveolens	2	630
2012/10/15	Lactuca sativa	2	630
2012/10/15	Medicinal herbs	2	630
2012/10/15	Petroselinum neapolitanum	2	630
2012/10/15	Raphanus sativus var. longipinnatus	2	630
2012/10/15	Raphanus sativus var. sativus	2	630
2012/10/15	Rosmarinus officinalis	2	630
2012/10/15	Solanum lycopersicum	2	630
2012/10/15	Vigna unguiculata	2	630
2012/10/15	Zingiber mioga	2	630
2012/10/29	Allium fistulosum	4	1260
2012/10/29	Allium tuberosum	4	1260
2012/10/29	Daucus carota subsp. sativus	4	1260
2012/10/29	Lactuca sativa	4	1260
2012/10/29	Medicinal herbs	4	1260
2012/10/29	Mentha suaveolens	4	1260
2012/10/29	Ocimum basilicum	4	1260
2012/10/29	Petroselinum neapolitanum	4	1260
2012/10/29	Raphanus sativus var. longipinnatus	4	1260
2012/10/29	Raphanus sativus var. sativus	4	1260
2012/10/29	Rosmarinus officinalis	4	1260
2012/10/29	Solanum lycopersicum	4	1260
2012/11/02	Allium fistulosum	4	1260
2012/11/02	Allium tuberosum	4	1260
2012/11/02	Apium graveolens var. dulce	4	1260
2012/11/02	Brassica rapa subsp. rapa	4	1260
2012/11/02	Crassocephalum crepidioides	4	1260
2012/11/02	Daucus carota subsp. sativus	4	1260
2012/11/02	Ipomoea batatas	4	1260
2012/11/02	Lactuca sativa	4	1260
2012/11/02	Petroselinum neapolitanum	4	1260
2012/11/02	Raphanus sativus var. longipinnatus	4	1260
2012/11/02	Raphanus sativus var. sativus	4	1260
2012/11/02	Rosmarinus officinalis	4	1260
2012/11/02	Solanum lycopersicum	4	1260
2012/11/03	Allium fistulosum	3	945
2012/11/03	Allium tuberosum	3	945
2012/11/03	Apium graveolens var. dulce	3	945
2012/11/03	Brassica rapa subsp. rapa	3	945
2012/11/03	Crassocephalum crepidioides	3	945
2012/11/03	Daucus carota subsp. sativus	3	945
2012/11/03	Ipomoea batatas	3	945
2012/11/03	Lactuca sativa	3	945
2012/11/03	Petroselinum neapolitanum	3	945
2012/11/03	Raphanus sativus var. longipinnatus	3	945
2012/11/03	Raphanus sativus var. sativus	3	945
2012/11/03	Rosmarinus officinalis	3	945
2012/11/03	Solanum lycopersicum	3	945
2012/11/16	Allium fistulosum	3	945
2012/11/16	Apium graveolens var. dulce	3	945
2012/11/16	Brassica rapa subsp. rapa	3	945
2012/11/16	Brassica rapa var. perviridis	3	945
2012/11/16	Crassocephalum crepidioides	3	945
2012/11/16	Ipomoea batatas	3	945
2012/11/16	Lactuca sativa	3	945
2012/11/16	Mentha suaveolens	3	945
2012/11/16	Petroselinum neapolitanum	3	945
2012/11/16	Raphanus sativus var. longipinnatus	3	945
2012/11/18	Allium fistulosum	2	630
2012/11/18	Allium schoenoprasum var. foliosum	2	630
2012/11/18	Apium graveolens var. dulce	4	1260
2012/11/18	Brassica rapa subsp. rapa	4	1260
2012/11/18	Brassica rapa var. perviridis	4	1260
2012/11/18	Crassocephalum crepidioides	4	1260
2012/11/18	Ipomoea batatas	4	1260
2012/11/18	Lactuca sativa	4	1260
2012/11/18	Mentha suaveolens	4	1260
2012/11/18	Petroselinum neapolitanum	4	1260
2012/11/18	Raphanus sativus var. longipinnatus	4	1260
2012/12/01	Allium chinense	6	1890
2012/12/01	Brassica oleracea var. italica	6	1890
2012/12/01	Daucus carota subsp. sativus	6	1890
2012/12/01	Helianthus tuberosus	6	1890
2012/12/01	Ipomoea batatas	6	1890
2012/12/01	Lactuca sativa	6	1890
2012/12/01	Mentha suaveolens	6	1890
2012/12/01	Other leaf vegetables	6	1890
2012/12/01	Petroselinum neapolitanum	6	1890
2012/12/01	Raphanus sativus var. longipinnatus	6	1890
2012/12/01	Rosmarinus officinalis	6	1890
2012/12/09	Allium chinense	3	945
2012/12/09	Brassica oleracea var. italica	3	945
2012/12/09	Daucus carota subsp. sativus	3	945
2012/12/09	Helianthus tuberosus	3	945
2012/12/09	Ipomoea batatas	3	945
2012/12/09	Lactuca sativa	3	945
2012/12/09	Mentha suaveolens	3	945
2012/12/09	Other leaf vegetables	3	945
2012/12/09	Petroselinum neapolitanum	3	945
2012/12/09	Raphanus sativus var. longipinnatus	3	945
2012/12/09	Rosmarinus officinalis	3	945
2012/12/10	Allium chinense	4	1260
2012/12/10	Brassica oleracea var. italica	4	1260
2012/12/10	Daucus carota subsp. sativus	4	1260
2012/12/10	Helianthus tuberosus	4	1260
2012/12/10	Ipomoea batatas	4	1260
2012/12/10	Lactuca sativa	4	1260
2012/12/10	Mentha suaveolens	4	1260
2012/12/10	Other leaf vegetables	4	1260
2012/12/10	Petroselinum neapolitanum	4	1260
2012/12/10	Raphanus sativus var. longipinnatus	4	1260
2012/12/10	Rosmarinus officinalis	4	1260
2012/12/16	Allium chinense	2	630
2012/12/16	Brassica oleracea var. italica	2	630
2012/12/16	Daucus carota subsp. sativus	2	630
2012/12/16	Helianthus tuberosus	2	630
2012/12/16	Ipomoea batatas	2	630
2012/12/16	Lactuca sativa	2	630
2012/12/16	Mentha suaveolens	2	630
2012/12/16	Other leaf vegetables	2	630
2012/12/16	Petroselinum neapolitanum	2	630
2012/12/16	Raphanus sativus var. longipinnatus	2	630
2012/12/16	Rosmarinus officinalis	2	630
2013/01/17	Brassica rapa var. pekinensis	4	1260
2013/01/17	Citrus hassaku	4	1260
2013/01/17	Citrus junos	4	1260
2013/01/17	Citrus unshiu	4	1260
2013/01/17	Citrus unshiu	4	1260
2013/01/17	Daucus carota subsp. sativus	4	1260
2013/01/17	Fortunella sp.	4	1260
2013/01/17	Lactuca sativa	4	1260
2013/01/17	Raphanus sativus var. longipinnatus	4	1260
2013/01/19	Brassica rapa var. pekinensis	10	3150
2013/01/19	Citrus hassaku	10	3150
2013/01/19	Citrus junos	10	3150
2013/01/19	Citrus unshiu	10	3150
2013/01/19	Citrus unshiu	10	3150
2013/01/19	Daucus carota subsp. sativus	10	3150
2013/01/19	Fortunella sp.	10	3150
2013/01/19	Lactuca sativa	10	3150
2013/01/19	Raphanus sativus var. longipinnatus	10	3150
2013/01/21	Brassica rapa var. pekinensis	5	1575
2013/01/21	Citrus hassaku	5	1575
2013/01/21	Citrus junos	5	1575
2013/01/21	Citrus unshiu	5	1575
2013/01/21	Citrus unshiu	5	1575
2013/01/21	Daucus carota subsp. sativus	5	1575
2013/01/21	Fortunella sp.	5	1575
2013/01/21	Lactuca sativa	5	1575
2013/01/21	Raphanus sativus var. longipinnatus	5	1575
2013/01/25	Brassica oleracea var. italica	6	1890
2013/01/25	Brassica rapa var. pekinensis	6	1890
2013/01/25	Citrus hassaku	6	1890
2013/01/25	Citrus junos	6	1890
2013/01/25	Citrus unshiu	6	1890
2013/01/25	Citrus unshiu	6	1890
2013/01/25	Daucus carota subsp. sativus	6	1890
2013/01/25	Fortunella sp.	6	1890
2013/01/25	Lactuca sativa	6	1890
2013/01/25	Raphanus sativus var. longipinnatus	6	1890
2013/01/26	Brassica rapa var. pekinensis	7	2205
2013/01/26	Citrus hassaku	7	2205
2013/01/26	Citrus junos	7	2205
2013/01/26	Citrus unshiu	7	2205
2013/01/26	Citrus unshiu	7	2205
2013/01/26	Daucus carota subsp. sativus	7	2205
2013/01/26	Fortunella sp.	7	2205
2013/01/26	Other leaf vegetables	7	2205
2013/01/26	Raphanus sativus var. longipinnatus	7	2205
2013/01/31	Brassica rapa var. pekinensis	6	1890
2013/01/31	Citrus hassaku	6	1890
2013/01/31	Citrus junos	6	1890
2013/01/31	Citrus unshiu	6	1890
2013/01/31	Citrus unshiu	6	1890
2013/01/31	Daucus carota subsp. sativus	6	1890
2013/01/31	Fortunella sp.	6	1890
2013/01/31	Lactuca sativa	6	1890
2013/01/31	Petasites japonicus	6	1890
2013/01/31	Raphanus sativus var. longipinnatus	6	1890
2013/02/04	Brassica oleracea var. italica	2	630
2013/02/04	Brassica rapa subsp. rapa	2	630
2013/02/04	Brassica rapa var. pekinensis	2	630
2013/02/04	Citrus hassaku	2	630
2013/02/04	Citrus junos	2	630
2013/02/04	Citrus unshiu	2	630
2013/02/04	Citrus unshiu	2	630
2013/02/04	Daucus carota subsp. sativus	2	630
2013/02/04	Fortunella sp.	2	630
2013/02/04	Other leaf vegetables	2	630
2013/02/04	Petasites japonicus	2	630
2013/02/04	Petroselinum neapolitanum	2	630
2013/02/04	Raphanus sativus var. longipinnatus	2	630
2013/02/16	Allium chinense	3	945
2013/02/16	Brassica oleracea var. botrytis	3	945
2013/02/16	Brassica oleracea var. italica	3	945
2013/02/16	Brassica rapa subsp. rapa	3	945
2013/02/16	Brassica rapa var. pekinensis	3	945
2013/02/16	Daucus carota subsp. sativus	3	945
2013/02/16	Lactuca sativa	3	945
2013/02/16	Other leaf vegetables	1.5	472
2013/02/16	Petasites japonicus	3	945
2013/02/16	Raphanus sativus var. longipinnatus	3	945
2013/03/16	Allium chinense	4	1260
2013/03/16	Allium fistulosum	4	1260
2013/03/16	Brassica oleracea var. capitata	4	1260
2013/03/16	Brassica oleracea var. italica	4	1260
2013/03/16	Brassica rapa var. nippo-oleifera	4	1260
2013/03/16	Daucus carota subsp. sativus	4	1260
2013/03/16	Fortunella sp.	4	1260
2013/03/16	Lactuca sativa	4	1260
2013/03/16	Petroselinum neapolitanum	4	1260
2013/03/16	Raphanus sativus var. longipinnatus	4	1260
2013/03/30	Allium chinense	2	630
2013/03/30	Allium fistulosum	2	630
2013/03/30	Brassica juncea cv. Wasabina	2	630
2013/03/30	Brassica oleracea var. capitata	2	630
2013/03/30	Brassica oleracea var. italica	2	630
2013/03/30	Brassica rapa var. nippo-oleifera	2	630
2013/03/30	Daucus carota subsp. sativus	2	630
2013/03/30	Fortunella sp.	2	630
2013/03/30	Lactuca sativa	2	630
2013/03/30	Petroselinum neapolitanum	2	630
2013/04/20	Allium chinense	2	630
2013/04/20	Allium fistulosum	2	630
2013/04/20	Allium tuberosum	2	630
2013/04/20	Apium graveolens var. dulce	1	315
2013/04/20	Brassica oleracea var. capitata	2	630
2013/04/20	Brassica rapa var. nippo-oleifera	2	630
2013/04/20	Coriandrum sativum	1	315
2013/04/20	Daucus carota subsp. sativus	2	630
2013/04/20	Lactuca sativa	2	630
2013/04/20	Petasites japonicus	2	630
2013/04/20	Petroselinum neapolitanum	2	630
2013/04/23	Allium chinense	10	3150
2013/04/23	Allium fistulosum	10	3150
2013/04/23	Lactuca sativa	10	3150
2013/04/23	Petasites japonicus	10	3150
2013/04/23	Petroselinum neapolitanum	10	3150
2013/04/23	Pisum sativum	10	3150
2013/04/23	Raphanus sativus var. longipinnatus	10	3150
2013/04/27	Allium chinense	5	1575
2013/04/27	Aralia cordata	5	1575
2013/04/27	Petasites japonicus	5	1575
2013/04/27	Pisum sativum	5	1575
2013/04/27	Raphanus sativus var. longipinnatus	5	1575
2013/04/30	Allium chinense	4	1260
2013/04/30	Aralia cordata	4	1260
2013/04/30	Mentha suaveolens	4	1260
2013/04/30	Petasites japonicus	4	1260
2013/04/30	Petroselinum crispum	4	1260
2013/04/30	Petroselinum neapolitanum	4	1260
2013/04/30	Pisum sativum	4	1260
2013/05/05	Allium chinense	7	2205
2013/05/05	Aralia cordata	7	2205
2013/05/05	Lactuca sativa	7	2205
2013/05/05	Mentha suaveolens	7	2205
2013/05/05	Petasites japonicus	7	2205
2013/05/05	Petroselinum crispum	7	2205
2013/05/05	Petroselinum neapolitanum	7	2205
2013/05/05	Pisum sativum	7	2205
2013/05/07	Allium chinense	8	2520
2013/05/07	Aralia cordata	8	2520
2013/05/07	Mentha suaveolens	8	2520
2013/05/07	Petasites japonicus	8	2520
2013/05/07	Petroselinum neapolitanum	8	2520
2013/05/07	Pisum sativum	8	2520
2013/05/13	Apium graveolens var. dulce	6	1890
2013/05/13	Aralia cordata	6	1890
2013/05/13	Mentha suaveolens	6	1890
2013/05/13	Petasites japonicus	6	1890
2013/05/13	Petroselinum crispum	6	1890
2013/05/13	Pisum sativum	6	1890
2013/05/13	Vicia faba	6	1890
2013/05/17	Allium chinense	2	630
2013/05/17	Allium tuberosum	2	630
2013/05/17	Aralia cordata	2	630
2013/05/17	Pisum sativum	2	630
2013/05/17	Vicia faba	2	630
2013/05/19	Anethum graveolens	10	3150
2013/05/19	Aralia cordata	10	3150
2013/05/19	Citrus unshiu	10	3150
2013/05/19	Mentha suaveolens	10	3150
2013/05/19	Petasites japonicus	10	3150
2013/05/19	Pisum sativum	10	3150
2013/05/19	Vicia faba	10	3150
2013/05/23	Allium chinense	4	1260
2013/05/23	Anethum graveolens	4	1260
2013/05/23	Citrus unshiu	4	1260
2013/05/23	Lactuca sativa	4	1260
2013/05/23	Mentha suaveolens	4	1260
2013/05/23	Pisum sativum	4	1260
2013/05/23	Rosmarinus officinalis	4	1260
2013/05/23	Vicia faba	4	1260
2013/05/26	Allium chinense	1	315
2013/05/26	Allium sativum	1	315
2013/05/26	Allium tuberosum	1	315
2013/05/26	Citrus unshiu	1	315
2013/05/26	Mentha suaveolens	1	315
2013/05/26	Petasites japonicus	1	315
2013/05/26	Rosmarinus officinalis	1	315
2013/05/26	Vicia faba	1	315
2013/05/27	Allium chinense	1	315
2013/05/27	Allium sativum	1	315
2013/05/27	Allium tuberosum	1	315
2013/05/27	Aralia cordata	1	315
2013/05/27	Citrus unshiu	1	315
2013/05/27	Mentha suaveolens	1	315
2013/05/27	Petasites japonicus	1	315
2013/05/27	Rosmarinus officinalis	1	315
2013/05/27	Vicia faba	1	315
2013/05/31	Allium chinense	2	630
2013/05/31	Allium tuberosum	2	630
2013/05/31	Anethum graveolens	2	630
2013/05/31	Aralia cordata	2	630
2013/05/31	Lactuca sativa	2	630
2013/05/31	Mentha suaveolens	2	630
2013/05/31	Petasites japonicus	2	630
2013/05/31	Rosmarinus officinalis	2	630
2013/05/31	Vicia faba	2	630
2013/06/16	Allium chinense	1	315
2013/06/16	Allium sativum	1	315
2013/06/16	Allium tuberosum	1	315
2013/06/16	Anethum graveolens	1	315
2013/06/16	Brassica oleracea var. capitata	1	315
2013/06/16	Brassica rapa var. perviridis	1	315
2013/06/16	Lactuca sativa	1	315
2013/06/16	Mentha suaveolens	1	315
2013/06/16	Other leaf vegetables	1	315
2013/06/16	Petasites japonicus	1	315
2013/06/16	Petroselinum neapolitanum	1	315
2013/06/16	Rosmarinus officinalis	1	315
2013/06/24	Allium chinense	5	1575
2013/06/24	Allium fistulosum	5	1575
2013/06/24	Allium sativum	5	1575
2013/06/24	Allium tuberosum	5	1575
2013/06/24	Anethum graveolens	5	1575
2013/06/24	Cucumis sativus	5	1575
2013/06/24	Mentha suaveolens	5	1575
2013/06/24	Petasites japonicus	5	1575
2013/06/24	Prunus domestica	5	1575
2013/06/24	Rosmarinus officinalis	5	1575
2013/06/24	Solanum lycopersicum	5	1575
2013/06/24	Solanum melongena	5	1575
2013/06/29	Allium chinense	5	1575
2013/06/29	Allium fistulosum	5	1575
2013/06/29	Allium tuberosum	5	1575
2013/06/29	Mentha suaveolens	5	1575
2013/06/29	Morella rubra	5	1575
2013/06/29	Petasites japonicus	5	1575
2013/06/29	Prunus domestica	5	1575
2013/06/29	Rosmarinus officinalis	5	1575
2013/06/29	Solanum lycopersicum	5	1575
2013/06/29	Solanum melongena	5	1575
2013/07/08	Allium chinense	5	1575
2013/07/08	Allium fistulosum	5	1575
2013/07/08	Allium tuberosum	5	1575
2013/07/08	Cucumis sativus	5	1575
2013/07/08	Petasites japonicus	5	1575
2013/07/08	Phaseolus vulgaris	5	1575
2013/07/08	Solanum lycopersicum	5	1575
2013/07/08	Solanum melongena	5	1575
2013/07/15	Allium chinense	3	945
2013/07/15	Allium fistulosum	3	945
2013/07/15	Allium tuberosum	3	945
2013/07/15	Cucumis sativus	3	945
2013/07/15	Petasites japonicus	3	945
2013/07/15	Solanum lycopersicum	3	945
2013/07/15	Solanum melongena	3	945
2013/07/19	Abelmoschus esculentus	6	1890
2013/07/19	Allium chinense	6	1890
2013/07/19	Allium fistulosum	6	1890
2013/07/19	Allium tuberosum	6	1890
2013/07/19	Cucumis sativus	6	1890
2013/07/19	Petasites japonicus	6	1890
2013/07/19	Rosmarinus officinalis	6	1890
2013/07/19	Solanum lycopersicum	6	1890
2013/07/19	Solanum melongena	6	1890
2013/07/19	Solanum tuberosum	6	1890
2013/07/25	Allium chinense	3	945
2013/07/25	Allium fistulosum	3	945
2013/07/25	Allium tuberosum	3	945
2013/07/25	Petasites japonicus	3	945
2013/07/25	Solanum lycopersicum	3	945
2013/07/25	Solanum melongena	3	945
2013/07/25	Solanum tuberosum	3	945
2013/08/01	Allium chinense	3	945
2013/08/01	Allium fistulosum	3	945
2013/08/01	Allium tuberosum	3	945
2013/08/01	Capsicum annuum var. grossum	1.5	472
2013/08/01	Cucumis sativus	1.5	472
2013/08/01	Petroselinum neapolitanum	3	945
2013/08/01	Solanum lycopersicum	3	945
2013/08/01	Solanum melongena	3	945
2013/08/01	Solanum tuberosum	3	945
2013/08/01	Zingiber mioga	3	945
2013/08/04	Allium chinense	1	315
2013/08/04	Allium fistulosum	1	315
2013/08/04	Allium tuberosum	1	315
2013/08/04	Capsicum annuum var. grossum	0.5	158
2013/08/04	Cucumis sativus	0.5	158
2013/08/04	Petroselinum crispum	1	315
2013/08/04	Petroselinum neapolitanum	1	315
2013/08/04	Solanum lycopersicum	1	315
2013/08/04	Solanum melongena	1	315
2013/08/04	Solanum tuberosum	1	315
2013/09/01	Allium fistulosum	1	315
2013/09/01	Allium tuberosum	1	315
2013/09/01	Corchorus olitorius	1	315
2013/09/01	Cucumis sativus	1	315
2013/09/01	Ficus carica	1	315
2013/09/01	Perilla frutescens var. crispa	1	315
2013/09/01	Solanum tuberosum	1	315
2013/09/01	Vaccinium sp.	1	315
2013/10/04	Allium chinense	1	315
2013/10/04	Allium fistulosum	1	315
2013/10/04	Allium tuberosum	1	315
2013/10/04	Citrus × limon	1	315
2013/10/04	Petroselinum neapolitanum	1	315
2013/10/04	Solanum melongena	1	315
2013/10/28	Allium fistulosum	1	315
2013/10/28	Allium tuberosum	1	315
2013/10/28	Citrus × limon	1	315
2013/10/28	Eruca sativa	1	315
2013/10/28	Lactuca sativa	1	315
2013/10/28	Petroselinum crispum	1	315
2013/10/28	Petroselinum neapolitanum	1	315
2013/10/28	Solanum melongena	1	315
2013/11/01	Allium chinense	3	945
2013/11/01	Allium fistulosum	3	945
2013/11/01	Allium tuberosum	3	945
2013/11/01	Brassica rapa var. perviridis	3	945
2013/11/01	Capsicum annuum cv. Parvo-acuminatum	3	945
2013/11/01	Citrus × limon	3	945
2013/11/01	Lactuca sativa	3	945
2013/11/01	Petroselinum crispum	3	945
2013/11/01	Petroselinum neapolitanum	3	945
2013/11/01	Solanum melongena	3	945
2013/11/11	Allium × proliferum	1	315
2013/11/11	Allium chinense	1	315
2013/11/11	Allium tuberosum	1	315
2013/11/11	Capsicum annuum cv. Parvo-acuminatum	1	315
2013/11/11	Citrus × limon	1	315
2013/11/11	Helianthus tuberosus	1	315
2013/11/11	Ipomoea batatas	1	315
2013/11/11	Petroselinum crispum	1	315
2013/11/11	Petroselinum neapolitanum	1	315
2013/11/11	Solanum melongena	1	315
2013/11/17	Allium chinense	12	3780
2013/11/17	Allium fistulosum	12	3780
2013/11/17	Allium tuberosum	12	3780
2013/11/17	Brassica oleracea var. capitata	12	3780
2013/11/17	Brassica rapa var. pekinensis	12	3780
2013/11/17	Citrus × limon	12	3780
2013/11/17	Crassocephalum crepidioides	12	3780
2013/11/17	Helianthus tuberosus	12	3780
2013/11/17	Ipomoea batatas	12	3780
2013/11/17	Lactuca sativa	12	3780
2013/11/25	Allium chinense	8	2520
2013/11/25	Allium fistulosum	8	2520
2013/11/25	Allium tuberosum	8	2520
2013/11/25	Brassica oleracea var. gemmifera	8	2520
2013/11/25	Brassica rapa var. pekinensis (early season cultivar)	8	2520
2013/11/25	Citrus × limon	8	2520
2013/11/25	Helianthus tuberosus	8	2520
2013/11/25	Ipomoea batatas	8	2520
2013/11/25	Lactuca sativa	8	2520
2013/11/25	Petroselinum neapolitanum	8	2520
2013/12/05	Allium chinense	4	1260
2013/12/05	Allium tuberosum	4	1260
2013/12/05	Brassica oleracea var. capitata	4	1260
2013/12/05	Brassica rapa var. pekinensis	4	1260
2013/12/05	Ipomoea batatas	4	1260
2013/12/05	Other leaf vegetables	4	1260
2013/12/05	Petroselinum neapolitanum	4	1260
2013/12/05	Rosmarinus officinalis	4	1260
2014/01/11	Allium chinense	10	3150
2014/01/11	Brassica oleracea var. capitata	10	3150
2014/01/11	Brassica rapa var. pekinensis	10	3150
2014/01/11	Citrus unshiu	10	3150
2014/01/11	Citrus unshiu	10	3150
2014/01/11	Fortunella sp.	10	3150
2014/01/11	Vaccinium bracteatum	10	3150
2014/01/12	Allium chinense	5	1575
2014/01/12	Brassica oleracea var. capitata	5	1575
2014/01/12	Brassica rapa var. pekinensis	5	1575
2014/01/12	Brassica rapa var. perviridis	4	1260
2014/01/12	Citrus unshiu	5	1575
2014/01/12	Daucus carota subsp. sativus	4	1260
2014/01/12	Fortunella sp.	5	1575
2014/01/12	Gardenia jasminoides	5	1575
2014/01/12	Raphanus sativus var. longipinnatus	4	1260
2014/01/12	Vaccinium bracteatum	5	1575
2014/01/13	Allium chinense	2	630
2014/01/13	Brassica oleracea var. capitata	2	630
2014/01/13	Brassica rapa var. pekinensis	2	630
2014/01/13	Citrus unshiu	2	630
2014/01/13	Fortunella sp.	2	630
2014/01/13	Vaccinium bracteatum	2	630
2014/02/13	Allium chinense	10	3150
2014/02/13	Brassica juncea	10	3150
2014/02/13	Brassica oleracea var. capitata	10	3150
2014/02/13	Brassica rapa var. pekinensis	10	3150
2014/02/13	Citrus unshiu	10	3150
2014/02/13	Daucus carota subsp. sativus	10	3150
2014/02/13	Fortunella sp.	10	3150
2014/02/13	Rosmarinus officinalis	10	3150
2014/02/13	Vaccinium bracteatum	10	3150
