# Supplementary material for: Power-law productivity and positive regime shift of symbiotic and climate-resilient edible ecosystems
Source: Research Square preprint supplement (doi:10.21203/rs.3.rs-80005/v1), 2020-12-15
Supplement: Supplementary file 3 [file e7d3e957fa5b69b058f5ae73.csv]

V1	V2	V3	V4	V5	V6	V7	V8	V9	V10	V11	V12	V13	V14	V15	V16	V17	V18	V19	V20	V21	V22	V23	V24	V25	V26	V27	V28	V29	V30	V31	V32	V33	V34	V35	V36	V37	V38	V39	V40	V41	V42	V43	V44	V45	V46	V47	V48	V49	V50
				Introduced Species	1	1	1	1	1	1	1	1	1	1	1	1	1	1	1	1	1	1	1	1	1	1	1	1	1	1	1	1	1	1	1	1	1	1	1	1	1	1	1	0	0	0	0	0	0
				Edible Species	1	1	1	1	1	1	1	1	1	1	1	1	1	1	1	1	1	1	1	1	1	1	1	1	1	1	1	1	1	1	1	1	1	1	1	1	1	1	1	0	0	1	1	1	0
				Academic Name	Lactuca sativa	Vicia faba L.	Pisum sativum L.	Glycine max (L.) Merr. subsp. max	Phaseolus vulgaris L.	Helianthus annuus L.	Cucumis sativus L.	Triticum aestivum	Brassica rapa L. var. perviridis L.H.Bailey		Xanthophthalmum coronarium (L.) P.D.Sell	Cichorium intybus	Cichorium intybus (“variant radicchio”)	Mentha suaveolens	Allium sativum L.	Allium tuberosum Rottler ex Spreng.	Allium chinense G.Don	Daucus carota L. subsp. sativus (Hoffm.) Arcang.	Solanum tuberosum L.	Colocasia esculenta (L.) Schott	Cryptotaenia canadensis (L.) DC. subsp. japonica (Hassk.) Hand.-Mazz.	Petroselinum crispum (Mill.) Fuss	Coriandrum sativum L.	Raphanus sativus L.	Raphanus sativus L. var. sativus	Eruca vesicaria (L.) Cav.	Brassica rapa var. Perviridis (local variant “shougatsuna”)	Brassica oleracea L. var. capitata L.	Allium fistulosum L.	Matricaria recutita	Perilla frutescens (L.) Britton var. crispa (Thunb.) H.Deane	Valerianella locusta (L.) Laterr.	Aralia cordata Thunb.		Brassicaceae	Lactuca sativa	Cucurbita maxima	Lycopersicon esculentum Mill.		Poaceae	Asteraceae	Artemisia indica Willd. var. maximowiczii (Nakai) H.Hara	Equisetum arvense L.	Capsella bursa-pastoris (L.) Medik.	Trifolium repens L.
Date	Cooridnates1	Cooridnates2	Cooridnates3	English Name	lettuce	broad bean	pea	soy bean	common bean	sunflower	cucumber	wheat	komatsuna	vegetables bud	crown daisy	chicory (green)	chicory (red)	apple mint	garlic	leek	shallot	carrot	potato	taro	mitsuba	parsley	coriander	daikon	radish	rocket	Komatsuna (var. Shougatsuna)	cabbage	leek	chamomile	shiso	corn salad	udo	other leaf vegetables	cruciferous vegetables (seedling)	lettuce (seedling)	pumpkin (seedling)	tomato (seedling)	fruit trees	Poaceae grasses	Asteraceae grasses	wormwood	horsetail	shepherd's purse	clover
記録日時	畑区画	畝番号	畝区画	和名	レタス	ソラマメ	エンドウマメ	ダイズ	インゲンマメ	ヒマワリ	キュウリ	ムギ	コマツナ	野菜の芽	シュンギク	チコリ(緑)	チコリ(赤)	アップルミント	ニンニク	ニラ	ラッキョウ	ニンジン	ジャガイモ	サトイモ	ミツバ	パセリ	コリアンダー	ダイコン	ハツカダイコン	ロケット	コマツナ(正月菜)	キャベツ	ネギ	カモミール	シソ	ノヂシャ	ウド	その他葉野菜	アブラナ科野菜(苗)	レタス(苗)	カボチャ(苗)	トマト(苗)	果樹	イネ科の草	キク科の草	ヨモギ	スギナ	ナズナ	クローバー
2011/01/04	NN1-7	1	d1		0	16.6666666666667	0	0	0	0	0	0	0	0	0	0	0	0	0	0	0	0	0	0	0	0	0	0	0	0	0	0	0	0	0	0	0	0	0	0	0	0	0	5.55555555555556	0	0	0	0	0
2011/01/04	NN1-7	1	d2		0	20.4081632653061	0	0	0	0	0	0	0	0	0	0	0	0	0	0	0	0	0	0	0	0	0	0	0	0	0	0	0	0	0	0	0	0	0	0	0	0	0	5.10204081632653	0	0	0	0	5.10204081632653
2011/01/04	NN1-7	1	d3		0	25.9259259259259	25.9259259259259	0	0	0	0	0	0	0	0	0	0	0	0	0	0	0	0	0	0	0	0	0	0	0	3.7037037037037	0	0	0	0	0	0	3.7037037037037	0	0	0	0	0	3.7037037037037	0	0	0	0	0
2011/01/04	NN1-7	1	d4		0	0	22.7272727272727	0	0	0	0	0	0	4.54545454545455	0	0	0	0	0	0	0	0	0	0	0	0	0	0	0	0	0	0	0	0	0	0	0	0	0	0	0	0	0	9.09090909090909	4.54545454545455	0	0	0	0
2011/01/04	NN8-14	8	d1		0	0	0	0	0	0	0	0	0	4.54545454545455	0	0	0	0	0	0	0	0	0	0	0	9.09090909090909	0	0	0	0	0	0	0	0	0	0	0	0	0	0	0	0	0	0	4.54545454545455	0	0	0	4.54545454545455
2011/01/04	NN8-14	8	d2		0	0	0	0	0	0	0	0	0	4.76190476190476	0	0	0	0	0	0	0	0	0	0	0	4.76190476190476	0	0	0	0	0	0	0	0	0	0	0	0	0	0	0	0	0	4.76190476190476	0	0	0	0	9.52380952380952
2011/01/04	NN8-14	8	d3		0	0	0	0	0	0	0	0	0	5	0	0	5	0	0	0	0	0	0	0	0	0	0	0	0	0	0	0	0	0	0	0	0	0	0	0	0	0	0	10	0	0	0	0	10
2011/01/04	NN8-14	8	d4		0	0	0	0	0	0	0	0	0	0	0	0	0	0	0	0	0	5.55555555555556	0	0	0	0	0	0	0	0	0	0	0	0	0	0	0	0	0	0	0	0	0	5.55555555555556	0	0	0	0	5.55555555555556
2011/01/04	SE	1	d1		0	0	0	0	0	0	0	0	0	0	0	4.95049504950495	0	0	0	0	0	2.97029702970297	0	0	0	0	0	0	0	0	0	0	0	0	0	0	0	0	0	0	0	0	0	2.97029702970297	0	0	0	0	0
2011/01/04	SE	1	d2		0	0	0	0	0	0	0	0	0	0	0	4.85436893203883	0	0	0	0	0	4.85436893203883	0	0	0	0	0	0	0	0	0	4.85436893203883	0	0	0	0	0	0	0	0	0	0	0	0	0	0	0	0	2.9126213592233
2011/01/04	SE	1	d3		0	0	0	0	0	0	0	0	0	0	0	4.46428571428571	0	0	0	2.67857142857143	2.67857142857143	8.92857142857143	0	0	0	0	0	0	0	0	0	0	0	0	0	0	0	0	0	0	0	0	0	2.67857142857143	2.67857142857143	0	0	0	0
2011/01/04	SE	1	d4		0	0	0	0	0	0	0	0	0	0	0	5.05050505050505	0	0	0	3.03030303030303	3.03030303030303	5.05050505050505	0	0	0	0	0	0	0	0	0	0	3.03030303030303	0	0	0	0	0	0	0	0	0	0	0	0	0	0	0	0
2011/01/04	SW	1	d1		0	5.26315789473684	0	0	0	0	0	0	0	0	0	0	0	0	0	0	0	0	0	0	0	0	0	0	0	0	0	0	0	0	0	0	0	0	0	0	0	0	0	10.5263157894737	5.26315789473684	0	0	0	0
2011/01/04	SW	1	d2		0	5	0	0	0	0	0	0	0	0	0	5	0	0	0	0	0	0	0	0	0	0	0	0	0	0	0	0	0	0	0	0	0	0	0	0	0	0	0	10	0	0	0	0	0
2011/01/04	SW	1	d3		0	5	0	0	0	0	0	0	0	0	0	5	0	5	0	0	0	0	0	0	0	0	0	0	0	0	0	0	0	0	0	0	0	0	0	0	0	0	0	10	0	0	0	0	0
2011/01/04	SW	1	d4		0	5	0	0	0	0	0	0	0	0	0	15	0	0	0	0	0	0	0	0	0	0	0	0	0	0	0	0	0	0	0	0	0	0	0	0	0	0	0	10	0	0	0	0	0
2011/01/09	NN1-7	2	d1		0	20	0	0	0	0	0	0	0	5	0	0	0	0	0	0	0	0	0	0	0	0	0	0	0	0	0	0	0	0	0	0	0	0	0	0	0	0	0	5	0	0	0	0	0
2011/01/09	NN1-7	2	d2		0	17.3913043478261	0	0	0	0	0	0	0	4.34782608695652	0	0	0	0	0	0	0	0	0	0	0	0	0	0	0	0	0	0	0	0	0	0	0	0	0	0	0	0	0	0	4.34782608695652	0	0	0	4.34782608695652
2011/01/09	NN1-7	2	d3		0	4.54545454545455	13.6363636363636	0	0	0	0	0	0	4.54545454545455	0	0	0	0	0	0	0	0	0	0	0	0	0	0	0	0	0	0	0	0	0	0	0	0	0	0	0	0	0	9.09090909090909	4.54545454545455	0	0	0	0
2011/01/09	NN1-7	2	d4		0	0	28.5714285714286	0	0	0	0	0	0	4.76190476190476	0	0	0	0	0	0	0	0	0	0	0	0	0	0	0	0	0	0	0	0	0	0	0	0	0	0	0	0	0	9.52380952380952	0	0	0	0	0
2011/01/09	NN8-14	9	d1		0	0	0	0	0	0	0	4.16666666666667	0	4.16666666666667	0	0	0	0	0	0	0	0	0	0	0	0	0	0	0	0	0	0	0	0	0	0	0	0	4.16666666666667	0	0	0	0	4.16666666666667	4.16666666666667	0	0	0	4.16666666666667
2011/01/09	NN8-14	9	d2		0	0	0	0	0	0	0	0	0	2.65486725663717	0	0	0	0	0	0	0	0	0	0	0	0	0	0	0	0	0	0	0	0	0	0	0	0	4.42477876106195	0	0	0	0	4.42477876106195	0	0	0	0	4.42477876106195
2011/01/09	NN8-14	9	d3		0	0	0	0	0	0	0	0	0	3.06122448979592	0	0	0	0	0	0	0	0	0	0	0	0	0	0	0	0	0	0	0	0	0	0	0	0	5.10204081632653	0	0	0	0	10.2040816326531	0	0	0	0	5.10204081632653
2011/01/09	NN8-14	9	d4		0	0	0	0	0	0	0	0	0	2.72727272727273	0	0	0	0	0	0	0	0	0	0	0	0	0	0	0	0	0	0	0	0	0	0	0	0	1.81818181818182	0	0	0	0	4.54545454545455	0	0	0	0	0
2011/01/09	SE	2	d1		0	0	0	0	0	0	0	0	0	0	0	8.69565217391304	0	0	0	0	0	0	0	0	0	0	0	0	0	0	0	0	0	0	0	0	0	0	8.69565217391304	0	0	0	0	0	4.34782608695652	0	0	0	0
2011/01/09	SE	2	d2		0	4.54545454545455	0	0	0	0	0	0	0	0	0	27.2727272727273	0	0	0	0	0	0	0	0	0	0	0	0	0	0	0	0	0	0	0	0	0	0	13.6363636363636	0	0	0	0	0	0	0	0	0	0
2011/01/09	SE	2	d3		0	9.52380952380952	0	0	0	0	0	0	0	0	0	14.2857142857143	0	0	0	0	0	0	0	0	0	0	0	0	0	0	0	0	0	0	0	0	0	0	9.52380952380952	0	0	0	0	0	0	0	0	0	0
2011/01/09	SE	2	d4		0	0	0	0	0	0	0	0	0	0	0	26.0869565217391	4.34782608695652	0	0	0	0	0	0	0	0	0	0	0	0	0	0	0	0	0	0	0	0	0	0	0	0	0	0	0	4.34782608695652	0	0	0	0
2011/01/09	SW	2	d1		0	11.5384615384615	0	0	0	0	0	0	0	0	0	3.84615384615385	0	0	0	0	3.84615384615385	0	0	0	0	0	0	0	0	0	0	0	0	0	0	0	0	0	0	0	0	0	0	7.69230769230769	0	0	0	0	0
2011/01/09	SW	2	d2		0	19.047619047619	0	0	0	0	0	0	0	0	0	9.52380952380952	0	0	0	0	4.76190476190476	0	0	0	0	0	0	0	0	0	0	0	0	0	0	0	0	0	0	0	0	0	0	0	0	0	0	0	0
2011/01/09	SW	2	d3		0	17.3913043478261	0	0	0	0	0	0	0	0	0	4.34782608695652	0	0	0	0	4.34782608695652	0	0	0	0	0	0	0	0	0	0	0	0	0	0	0	0	0	0	0	0	0	0	8.69565217391304	0	0	0	0	0
2011/01/09	SW	2	d4		0	0	0	0	0	0	0	0	0	0	0	13.3333333333333	0	0	0	0	6.66666666666667	0	0	0	0	0	0	0	0	0	0	0	0	0	0	0	0	0	0	0	0	0	0	13.3333333333333	0	0	0	0	6.66666666666667
2011/01/11	NN1-7	3	d1		0	16.3934426229508	0	0	0	0	0	0	0	4.0983606557377	0	0	0	0	0	0	0	0	0	0	0	0	0	0	0	0	0	0	0	0	0	0	0	0	0	0	0	0	0	4.0983606557377	1.63934426229508	0	0	0	4.0983606557377
2011/01/11	NN1-7	3	d2		0	12.2950819672131	0	0	0	0	0	0	0	4.0983606557377	0	0	0	0	0	0	0	0	0	0	0	0	0	0	0	0	0	0	0	0	0	0	0	0	0	0	0	0	0	8.19672131147541	0	0	0	0	1.63934426229508
2011/01/11	NN1-7	3	d3		0	5.88235294117647	35.2941176470588	0	0	0	0	0	0	5.88235294117647	0	0	0	0	0	0	0	0	0	0	0	0	0	0	0	0	0	0	0	0	0	0	0	0	0	0	0	0	0	0	0	0	0	0	0
2011/01/11	NN1-7	3	d4		0	0	26.7857142857143	0	0	0	0	0	0	0	0	0	0	0	0	0	0	0	0	0	0	0	0	0	0	0	0	0	0	0	0	0	0	0	0	0	0	0	0	13.3928571428571	4.46428571428571	0	0	0	1.78571428571429
2011/01/11	NN1-7	4	d1		0	0	0	0	0	0	0	0	0	10	0	0	0	0	0	0	0	0	0	0	0	0	0	0	0	0	0	0	0	0	0	0	0	0	0	0	0	0	0	10	0	0	0	0	5
2011/01/11	NN1-7	4	d2		0	0	0	0	0	0	0	0	0	14.2857142857143	0	0	0	0	0	0	0	0	0	0	0	0	0	0	0	0	0	0	0	0	0	0	0	0	0	0	0	0	0	9.52380952380952	0	0	0	0	4.76190476190476
2011/01/11	NN1-7	4	d3		0	0	0	0	0	0	0	0	0	10	0	0	0	0	0	0	0	0	0	0	0	0	0	0	0	0	0	0	0	0	0	0	0	0	0	0	0	0	0	5	5	0	0	0	5
2011/01/11	NN1-7	4	d4		0	0	0	0	0	0	0	0	0	9.09090909090909	0	0	0	0	0	0	0	0	0	0	0	0	0	0	0	0	0	0	0	0	0	0	0	0	0	0	0	0	0	9.09090909090909	0	0	0	0	4.54545454545455
2011/01/11	NN8-14	10	d1		0	0	0	0	0	0	0	0	0	4	0	0	0	0	0	0	0	4	0	0	0	0	0	0	0	0	0	0	0	0	0	0	0	0	4	0	0	0	0	12	4	0	0	0	4
2011/01/11	NN8-14	10	d2		0	0	0	0	0	0	0	0	0	4.16666666666667	0	0	0	0	0	0	0	0	0	0	0	0	0	0	0	0	0	0	0	0	0	0	0	0	4.16666666666667	0	0	0	0	12.5	4.16666666666667	0	0	0	4.16666666666667
2011/01/11	NN8-14	10	d3		0	0	0	0	0	0	0	0	0	1.8348623853211	0	0	0	0	0	0	0	0	0	0	0	0	0	0	0	0	0	0	0	0	0	0	0	0	1.8348623853211	0	0	0	0	9.1743119266055	0	0	0	0	9.1743119266055
2011/01/11	NN8-14	10	d4		0	0	0	0	0	0	0	0	0	4.23728813559322	0	0	0	0	0	0	0	0	0	0	0	0	0	0	0	0	0	0	0	0	0	0	0	0	2.54237288135593	0	0	0	0	4.23728813559322	4.23728813559322	0	0	0	4.23728813559322
2011/01/11	NN8-14	11	d1		0	0	0	0	0	0	0	0	0	0	0	0	0	0	0	0	0	2.65486725663717	0	0	0	0	0	0	0	0	0	0	0	0	0	0	0	0	0	0	0	0	0	17.6991150442478	0	0	0	0	0
2011/01/11	NN8-14	11	d2		0	0	0	0	0	0	0	0	0	0	0	0	0	0	0	0	0	0	0	0	0	0	0	0	0	0	0	0	0	0	0	0	0	0	1.96078431372549	0	0	0	0	19.6078431372549	0	0	0	0	0
2011/01/11	NN8-14	11	d3		0	0	0	0	0	0	0	0	0	0	0	0	0	0	0	0	0	0	0	0	0	4.0983606557377	0	0	0	0	0	0	0	0	0	0	0	0	1.63934426229508	0	0	0	0	16.3934426229508	0	0	0	0	0
2011/01/11	NN8-14	11	d4		0	0	0	0	0	0	0	0	0	0	0	0	0	0	0	0	0	0	0	0	0	8.69565217391304	0	0	0	0	0	0	0	0	0	0	0	0	0	0	0	0	0	8.69565217391304	0	0	0	0	0
2011/01/12	NN1-7	5	d1		0	0	0	0	0	0	0	0	0	4.34782608695652	0	0	0	0	0	0	0	0	0	0	0	0	0	0	0	0	0	0	0	0	0	0	0	0	0	0	0	0	0	8.69565217391304	4.34782608695652	0	0	0	4.34782608695652
2011/01/12	NN1-7	5	d2		0	0	0	0	0	0	0	0	0	1.86915887850467	0	0	0	0	0	0	0	0	0	0	0	0	0	0	0	0	0	0	0	0	0	0	0	0	0	0	0	0	0	4.67289719626168	0	0	0	0	4.67289719626168
2011/01/12	NN1-7	5	d3		0	0	0	0	0	0	0	0	0	5	0	0	0	0	0	0	0	0	0	0	0	0	0	0	0	0	0	0	0	0	0	0	0	0	0	0	0	0	0	5	0	0	0	0	0
2011/01/12	NN1-7	5	d4		0	0	0	0	0	0	0	0	0	5.26315789473684	0	0	0	0	0	0	0	0	0	0	0	0	0	0	0	0	0	0	0	0	0	0	0	0	0	0	0	0	0	5.26315789473684	0	0	0	0	5.26315789473684
2011/01/12	NN1-7	6	d1		0	0	0	0	0	0	0	0	0	1.78571428571429	0	0	0	0	0	0	0	0	0	0	0	0	0	0	0	0	0	0	0	0	0	0	0	0	0	0	0	0	0	4.46428571428571	0	0	0	0	4.46428571428571
2011/01/12	NN1-7	6	d2		0	0	0	0	0	0	0	0	0	4.34782608695652	0	0	0	0	0	0	0	0	0	0	0	0	0	0	0	0	0	0	0	0	0	0	0	0	0	0	0	0	0	4.34782608695652	0	0	0	0	4.34782608695652
2011/01/12	NN1-7	6	d3		0	0	0	0	0	0	0	0	0	1.86915887850467	0	0	0	0	0	0	0	0	0	0	0	0	0	0	0	0	0	0	0	0	0	0	0	0	0	0	0	0	0	9.34579439252336	0	0	0	0	0
2011/01/12	NN1-7	6	d4		0	0	0	0	0	0	0	0	0	2.17391304347826	0	0	0	0	0	0	0	0	0	0	0	0	0	0	0	0	0	0	0	0	0	0	0	0	0	0	0	0	0	5.43478260869565	0	0	0	0	0
2011/01/12	NN8-14	11	d1		0	0	0	0	0	0	0	0	0	1.8018018018018	0	0	0	0	1.8018018018018	0	0	0	0	0	0	0	0	0	0	0	0	0	0	0	0	0	0	0	1.8018018018018	0	0	0	0	18.018018018018	0	0	0	0	0
2011/01/12	NN8-14	11	d2		0	0	0	0	0	0	0	0	0	0	0	0	0	0	0	0	0	0	0	0	0	1.8348623853211	0	0	0	0	0	0	0	0	0	0	0	0	1.8348623853211	0	0	0	0	27.5229357798165	0	0	0	0	0
2011/01/12	NN8-14	11	d3		0	0	0	0	0	0	0	0	0	0	0	0	0	0	0	0	0	0	0	0	0	9.34579439252336	0	0	0	0	0	0	0	0	0	0	0	0	1.86915887850467	0	0	0	0	18.6915887850467	0	0	0	0	0
2011/01/12	NN8-14	11	d4		0	0	0	0	0	0	0	0	0	0	0	0	0	0	0	0	0	0	0	0	0	13.3928571428571	0	0	0	0	0	0	0	0	0	0	0	0	1.78571428571429	0	0	0	0	4.46428571428571	0	0	0	0	0
2011/01/12	NN8-14	12	d1		0	0	0	0	0	0	0	0	0	0	0	0	0	0	9.34579439252336	0	0	0	0	0	0	0	0	0	0	0	0	0	0	0	0	0	0	0	1.86915887850467	0	0	0	0	18.6915887850467	0	0	0	0	0
2011/01/12	NN8-14	12	d2		0	0	0	0	0	0	0	0	0	1.98019801980198	0	0	0	0	0	0	0	0	0	0	0	0	0	0	0	0	0	0	0	0	0	0	0	0	1.98019801980198	0	0	0	0	19.8019801980198	0	0	0	0	4.95049504950495
2011/01/12	NN8-14	12	d3		0	0	0	0	0	0	0	0	0	1.92307692307692	0	0	0	0	0	0	0	0	0	0	0	0	0	0	0	0	0	0	0	0	0	0	0	0	1.92307692307692	0	0	0	0	9.61538461538462	0	0	0	0	9.61538461538462
2011/01/12	NN8-14	12	d4		0	0	0	0	0	0	0	0	0	2.02020202020202	0	0	0	0	0	0	0	0	0	0	0	0	0	0	0	0	0	0	0	0	0	0	0	0	2.02020202020202	0	0	0	0	5.05050505050505	0	0	0	0	10.1010101010101
2011/01/12	SE	3	d1		0	0	0	0	0	0	0	0	0	1.85185185185185	0	4.62962962962963	1.85185185185185	0	0	0	0	4.62962962962963	0	0	0	0	0	0	0	0	0	0	0	0	0	0	0	0	9.25925925925926	0	0	0	0	0	1.85185185185185	0	0	0	1.85185185185185
2011/01/12	SE	3	d2		0	1.70940170940171	0	0	0	0	0	0	0	0	0	4.27350427350427	0	0	0	0	0	4.27350427350427	0	0	0	0	0	0	0	0	0	0	0	0	0	0	0	0	12.8205128205128	0	0	0	0	0	4.27350427350427	0	0	0	0
2011/01/12	SE	3	d3		0	5.26315789473684	0	0	0	0	0	0	0	5.26315789473684	0	10.5263157894737	0	0	0	0	0	5.26315789473684	0	0	0	0	0	0	0	0	0	0	0	0	0	0	0	0	21.0526315789474	0	0	0	0	0	0	0	0	0	0
2011/01/12	SE	3	d4		0	0	0	0	0	0	0	0	0	0	0	4.76190476190476	0	0	0	0	0	4.76190476190476	0	0	0	0	0	0	0	0	0	0	0	0	0	0	0	9.52380952380952	0	0	0	0	0	0	4.76190476190476	0	0	0	0
2011/01/12	SW	3	d1		0	1.69491525423729	0	0	0	0	0	0	0	0	0	25.4237288135593	0	1.69491525423729	0	0	1.69491525423729	0	0	0	0	0	0	0	0	0	0	0	0	0	0	0	0	0	1.69491525423729	0	0	0	0	4.23728813559322	4.23728813559322	0	0	0	0
2011/01/12	SW	3	d2		0	1.88679245283019	0	0	0	0	0	0	0	0	0	9.43396226415094	0	1.88679245283019	0	0	1.88679245283019	0	0	0	0	0	0	0	0	0	0	0	0	0	0	0	0	0	9.43396226415094	0	0	0	0	4.71698113207547	4.71698113207547	0	0	0	0
2011/01/12	SW	3	d3		0	1.72413793103448	0	0	0	0	0	0	0	0	0	0	0	1.72413793103448	0	0	1.72413793103448	0	0	0	0	0	0	0	0	0	0	0	0	0	0	0	0	0	8.62068965517241	0	0	0	0	12.9310344827586	4.31034482758621	0	0	0	0
2011/01/12	SW	3	d4		0	4.20168067226891	0	0	0	0	0	0	0	0	0	8.40336134453782	0	4.20168067226891	0	0	1.68067226890756	0	0	0	0	0	0	0	0	0	0	0	0	0	0	0	0	0	1.68067226890756	0	0	0	0	4.20168067226891	0	0	0	0	0
2011/01/13	NN1-7	7	d1		0	0	0	0	0	0	0	0	0	4.67289719626168	0	0	32.7102803738318	0	0	0	0	0	0	0	0	0	0	0	0	0	0	0	0	0	0	0	0	0	0	0	0	0	0	4.67289719626168	0	0	0	0	0
2011/01/13	NN1-7	7	d2		0	0	0	0	0	0	0	0	0	4.54545454545455	0	0	54.5454545454545	0	0	0	0	0	0	0	0	0	0	0	0	0	0	0	0	0	0	0	0	0	0	0	0	0	0	4.54545454545455	0	0	0	0	0
2011/01/13	NN1-7	7	d3		0	0	0	0	0	0	0	0	0	4.34782608695652	0	0	30.4347826086957	0	0	0	0	0	0	0	0	0	0	0	0	0	0	0	0	0	0	0	0	0	0	0	0	0	0	4.34782608695652	0	0	0	0	4.34782608695652
2011/01/13	NN1-7	7	d4		0	0	0	0	0	0	0	0	0	4.34782608695652	0	0	4.34782608695652	0	0	0	0	8.69565217391304	0	0	0	0	0	0	0	0	0	0	0	0	0	0	0	0	0	0	0	0	0	4.34782608695652	4.34782608695652	0	0	0	0
2011/01/13	NN8-14	13	d1		0	0	0	0	0	0	0	0	0	4.03225806451613	0	0	0	0	4.03225806451613	0	0	0	0	0	0	0	0	0	1.61290322580645	0	0	0	0	0	0	0	0	0	1.61290322580645	0	0	0	0	4.03225806451613	4.03225806451613	0	0	0	4.03225806451613
2011/01/13	NN8-14	13	d2		0	0	0	0	0	0	0	0	1.76991150442478	0	0	0	0	0	0	0	4.42477876106195	0	0	0	0	0	0	0	1.76991150442478	0	0	0	0	0	0	0	0	0	1.76991150442478	0	0	0	0	4.42477876106195	0	0	0	0	4.42477876106195
2011/01/13	NN8-14	13	d3		0	0	0	0	0	0	0	0	0	0	0	0	0	0	0	0	0	0	0	0	0	0	0	0	5	0	0	0	0	0	0	0	0	0	5	0	0	0	0	5	5	0	0	0	10
2011/01/13	NN8-14	13	d4		4.34782608695652	0	0	0	0	0	0	0	0	0	0	0	0	0	0	0	0	0	0	0	0	0	0	0	0	0	0	0	0	0	0	0	0	0	8.69565217391304	0	0	0	0	4.34782608695652	0	0	0	0	17.3913043478261
2011/01/13	NN8-14	14	d1		0	0	0	0	0	0	0	0	4.54545454545455	0	0	0	0	0	4.54545454545455	0	0	0	0	0	0	0	0	0	1.81818181818182	0	0	0	0	0	0	0	0	0	2.72727272727273	0	0	0	0	4.54545454545455	0	0	0	0	9.09090909090909
2011/01/13	NN8-14	14	d2		0	0	0	0	0	0	0	0	4.58715596330275	0	0	0	0	0	0	0	1.8348623853211	0	0	0	0	0	0	4.58715596330275	0	0	0	0	0	0	0	0	0	0	1.8348623853211	0	0	0	0	4.58715596330275	0	0	0	0	0
2011/01/13	NN8-14	14	d3		0	0	0	0	0	0	0	0	8.33333333333333	0	0	0	0	0	0	0	0	0	0	0	0	0	0	4.16666666666667	0	0	0	0	0	0	0	0	0	0	4.16666666666667	0	0	0	0	4.16666666666667	0	0	0	0	4.16666666666667
2011/01/13	NN8-14	14	d4		0	0	0	0	0	0	0	0	4.46428571428571	0	0	0	0	0	0	0	0	0	0	0	0	0	0	4.46428571428571	0	0	0	0	0	0	0	0	0	0	1.78571428571429	0	0	0	0	4.46428571428571	0	0	0	0	4.46428571428571
2011/01/13	SW	4	d1		0	0	2.17391304347826	0	0	0	0	0	0	0	0	0	0	0	0	0	0	0	0	0	0	0	0	0	0	0	0	0	0	0	0	0	0	0	5.43478260869565	0	0	0	0	5.43478260869565	5.43478260869565	0	0	0	0
2011/01/13	SW	4	d2		0	0	1.75438596491228	0	0	0	0	0	0	0	0	0	0	1.75438596491228	0	0	0	0	0	0	0	0	0	0	0	0	0	0	0	0	0	0	0	0	17.5438596491228	0	0	0	0	4.3859649122807	4.3859649122807	0	0	0	0
2011/01/13	SW	4	d3		0	0	2.06185567010309	0	0	0	0	0	0	0	0	0	0	0	0	0	0	0	0	0	0	0	0	0	0	0	0	0	0	0	0	0	0	0	10.3092783505155	0	0	0	0	5.15463917525773	5.15463917525773	0	0	0	0
2011/01/13	SW	4	d4		0	0	1.96078431372549	0	0	0	0	0	0	0	0	0	0	0	0	0	0	0	0	0	0	0	0	0	0	0	0	0	0	0	0	0	0	0	9.80392156862745	0	0	0	0	4.90196078431373	4.90196078431373	0	0	0	0
2011/01/13	SE	4	d1		0	0	0	0	0	0	0	0	0	0	0	4.46428571428571	1.78571428571429	0	0	0	0	4.46428571428571	0	0	0	0	0	0	0	0	0	0	0	0	0	0	0	0	4.46428571428571	0	0	0	0	0	4.46428571428571	0	0	0	0
2011/01/13	SE	4	d2		0	0	0	0	0	0	0	0	0	0	0	9.09090909090909	0	0	0	0	0	4.54545454545455	0	0	0	0	0	0	0	0	0	0	0	0	0	0	0	0	4.54545454545455	0	0	0	0	0	4.54545454545455	0	0	0	0
2011/01/13	SE	4	d3		0	0	4.76190476190476	0	0	0	0	0	0	0	0	9.52380952380952	0	0	0	0	0	0	0	0	0	0	0	0	0	0	0	0	0	0	0	0	0	0	14.2857142857143	0	0	0	0	0	4.76190476190476	0	0	0	0
2011/01/13	SE	4	d4		0	0	0	0	0	0	0	0	0	0	0	8.69565217391304	8.69565217391304	0	0	0	0	0	0	0	0	0	0	0	0	0	0	0	0	0	0	0	0	0	0	0	0	0	0	0	4.34782608695652	0	0	0	0
2011/01/18	NN1-7	1	d1		0	14.2857142857143	0	0	0	0	0	0	0	4.76190476190476	0	0	0	0	0	0	0	0	0	0	0	0	0	0	0	0	0	0	0	0	0	0	0	0	0	0	0	0	0	4.76190476190476	0	0	0	0	0
2011/01/18	NN1-7	1	d2		0	18.018018018018	0	0	0	0	0	0	0	4.5045045045045	0	0	0	0	0	0	0	0	0	0	0	0	0	0	0	0	0	0	0	0	0	0	0	0	0	0	0	0	0	4.5045045045045	1.8018018018018	1.8018018018018	0	0	9.00900900900901
2011/01/18	NN1-7	1	d3		0	5	25	0	0	0	0	0	0	5	0	0	0	0	0	0	0	0	0	0	0	0	0	0	0	0	0	0	0	0	0	0	0	0	0	0	0	0	0	10	0	0	0	0	0
2011/01/18	NN1-7	1	d4		0	0	22.7272727272727	0	0	0	0	0	0	9.09090909090909	0	0	0	0	0	0	0	0	0	0	0	0	0	0	0	0	0	0	0	0	0	0	0	0	0	0	0	0	0	13.6363636363636	4.54545454545455	0	0	0	0
2011/01/18	NN8-14	8	d1		0	0	0	0	0	0	0	0	0	5.26315789473684	0	0	5.26315789473684	0	0	0	0	0	0	0	0	15.7894736842105	0	0	0	0	0	0	0	0	0	0	0	0	0	0	0	0	0	0	5.26315789473684	0	0	0	5.26315789473684
2011/01/18	NN8-14	8	d2		0	0	0	0	0	0	0	0	0	5.10204081632653	0	0	5.10204081632653	0	0	0	0	0	0	0	0	3.06122448979592	0	0	0	0	0	0	0	0	0	0	0	0	0	0	0	0	0	0	5.10204081632653	0	0	0	15.3061224489796
2011/01/18	NN8-14	8	d3		0	0	0	0	0	0	0	0	0	3.03030303030303	0	0	3.03030303030303	0	0	0	0	3.03030303030303	0	0	0	0	0	0	0	0	0	0	0	0	0	0	0	0	0	0	0	0	0	10.1010101010101	0	0	0	0	5.05050505050505
2011/01/18	NN8-14	8	d4		0	0	0	0	0	0	0	0	0	0	0	0	0	0	0	0	0	5.10204081632653	0	0	0	0	0	0	0	0	0	0	0	0	0	0	0	0	0	0	0	0	0	3.06122448979592	0	0	0	0	5.10204081632653
2011/01/18	SE	1	d1		0	0	0	0	0	0	0	0	0	0	0	4.71698113207547	0	0	0	0	0	1.88679245283019	0	0	0	0	0	0	0	0	0	0	0	0	0	0	0	0	0	0	0	0	0	1.88679245283019	1.88679245283019	0	0	0	0
2011/01/18	SE	1	d2		0	0	0	0	0	0	0	0	0	0	0	1.86915887850467	0	0	0	0.934579439252336	0	1.86915887850467	0	0	0	0	0	0	0	0	0	4.67289719626168	0	0	0	0	0	0	0	0	0	0	0	0	0	0	0	0	1.86915887850467
2011/01/18	SE	1	d3		0	0	0	0	0	0	0	0	0	1.96078431372549	0	0	0	0	0	0	1.96078431372549	1.96078431372549	0	0	0	0	0	0	0	0	0	0	0	0	0	0	0	0	0	0	0	0	0	1.96078431372549	1.96078431372549	0	0	0	1.96078431372549
2011/01/18	SE	1	d4		0	0	0	0	0	0	0	0	0	0	0	1.75438596491228	0	0	0	0	1.75438596491228	2.63157894736842	0	0	0	0	0	0	0	0	0	0	0	0	0	0	0	0	0	0	0	0	0	4.3859649122807	1.75438596491228	0	0	0	0
2011/01/18	SW	1	d1		0	0	2.9126213592233	0	0	0	0	0	0	0	0	0	0	0	0	0	0	0	0	0	0	0	0	0	0	0	0	0	0	0	0	0	0	0	0	0	0	0	0	9.70873786407767	4.85436893203883	0	0	0	0
2011/01/18	SW	1	d2		0	0	2.60869565217391	0	0	0	0	0	0	0	0	4.34782608695652	0	0	0	0	1.73913043478261	0	0	0	0	0	0	0	0	0	0	0	0	0	0	0	0	0	0	0	0	0	0	8.69565217391304	0	0	0	0	0
2011/01/18	SW	1	d3		0	0	1.92307692307692	0	0	0	0	0	0	0	0	4.80769230769231	0	1.92307692307692	0	0	0	0	0	0	0	0	0	0	0	0	0	0	0	0	0	0	0	0	0	0	0	0	0	9.61538461538462	0	0	0	0	0
2011/01/18	SW	1	d4		0	0	4.34782608695652	0	0	0	0	0	0	0	0	13.0434782608696	0	0	0	0	0	0	0	0	0	0	0	0	0	0	0	0	0	0	0	0	0	0	0	0	0	0	0	8.69565217391304	0	0	0	0	0
2011/01/20	NN1-7	2	d1		0	9.52380952380952	0	0	0	0	0	0	0	4.76190476190476	0	0	0	0	0	0	0	0	0	0	0	0	0	0	0	0	0	0	0	0	0	0	0	0	0	0	0	0	0	4.76190476190476	4.76190476190476	0	0	0	0
2011/01/20	NN1-7	2	d2		0	13.3928571428571	0	0	0	0	0	0	0	4.46428571428571	0	0	0	0	0	0	0	0	0	0	0	0	0	0	0	0	0	0	0	0	0	0	0	0	0	0	0	0	0	0	4.46428571428571	0	0	0	1.78571428571429
2011/01/20	NN1-7	2	d3		0	5	15	0	0	0	0	0	0	3	0	0	0	0	0	0	0	0	0	0	0	0	0	0	0	0	0	0	0	0	0	0	0	0	0	0	0	0	0	5	5	0	0	0	2
2011/01/20	NN1-7	2	d4		0	0	28.0373831775701	0	0	0	0	0	0	2.80373831775701	0	0	0	0	0	0	0	0	0	0	0	0	0	0	0	0	0	0	0	0	0	0	0	0	0	0	0	0	0	9.34579439252336	1.86915887850467	0	0	0	1.86915887850467
2011/01/20	NN8-14	9	d1		0	0	0	0	0	0	0	0	0	2.54237288135593	0	0	0	0	0	0	0	0	0	0	0	0	0	0	0	0	0	0	0	0	0	0	0	0	1.69491525423729	0	0	0	0	8.47457627118644	2.54237288135593	0	0	0	4.23728813559322
2011/01/20	NN8-14	9	d2		0	0	0	0	0	0	0	0	0	4.34782608695652	0	0	0	0	0	0	0	0	0	0	0	0	0	0	0	0	0	0	0	0	0	0	0	0	2.60869565217391	0	0	0	0	8.69565217391304	1.73913043478261	0	0	0	4.34782608695652
2011/01/20	NN8-14	9	d3		0	0	0	0	0	0	0	0	0	4.62962962962963	0	0	0	0	0	0	0	0	0	0	0	0	0	0	0	0	0	0	0	0	0	0	0	0	2.77777777777778	0	0	0	0	13.8888888888889	0	0	0	0	9.25925925925926
2011/01/20	NN8-14	9	d4		0	0	0	0	0	0	0	0	0	5	0	0	0	0	0	0	0	0	0	0	0	0	0	0	0	0	0	0	0	0	0	0	0	0	0	0	0	0	0	10	0	0	0	0	5
2011/01/21	NN1-7	3	d1		0	12.8205128205128	0	0	0	0	0	0	0	4.27350427350427	0	0	0	0	0	0	0	0	0	0	0	0	0	0	0	0	0	0	0	0	0	0	0	0	0	0	0	0	0	4.27350427350427	1.70940170940171	0	0	0	4.27350427350427
2011/01/21	NN1-7	3	d2		0	13.2743362831858	0	0	0	0	0	0	0	4.42477876106195	0	0	0	0	0	0	0	0	0	0	0	0	0	0	0	0	0	0	0	0	0	0	0	0	0	0	0	0	0	4.42477876106195	4.42477876106195	0	0	0	2.65486725663717
2011/01/21	NN1-7	3	d3		0	5	25	0	0	0	0	0	0	5	0	0	0	0	0	0	0	0	0	0	0	0	0	0	0	0	0	0	0	0	0	0	0	0	0	0	0	0	0	10	0	0	0	0	5
2011/01/21	NN1-7	3	d4		0	0	18.6915887850467	0	0	0	0	0	0	0	0	0	0	0	0	0	0	0	0	0	0	0	0	0	0	0	0	0	0	0	0	0	0	0	0	0	0	0	0	14.018691588785	4.67289719626168	0	0	0	1.86915887850467
2011/01/21	NN8-14	10	d1		0	0	0	0	0	0	0	0	0	1.98019801980198	0	0	0	0	4.95049504950495	0	0	0	0	0	0	0	0	0	0	0	0	0	0	0	0	0	0	0	1.98019801980198	0	0	0	0	14.8514851485149	1.98019801980198	0	0	0	0
2011/01/21	NN8-14	10	d2		0	0	0	0	0	0	0	0	0	2.77777777777778	0	0	0	0	0	0	0	0	0	0	0	0	0	0	0	0	0	0	0	0	0	0	0	0	1.85185185185185	0	0	0	0	13.8888888888889	4.62962962962963	0	0	0	0
2011/01/21	NN8-14	10	d3		0	0	0	0	0	0	0	0	0	1.85185185185185	0	0	0	0	0	0	0	0	0	0	0	0	0	0	0	0	0	0	0	0	0	0	0	0	0.925925925925926	0	0	0	0	18.5185185185185	0	0	0	0	9.25925925925926
2011/01/21	NN8-14	10	d4		0	0	0	0	0	0	0	0	0	2.88461538461538	0	0	0	0	0	0	0	0	0	0	0	0	0	0	0	0	0	0	0	0	0	0	0	0	0.961538461538462	0	0	0	0	9.61538461538462	2.88461538461538	0	0	0	0
2011/01/22	NN1-7	4	d1		0	0	0	0	0	0	0	0	0	3.93700787401575	0	0	0	0	2.36220472440945	0	0	0	0	0	0	0	0	0	0	0	0	0	0	0	0	0	0	0	0	0	0	0	0	15.748031496063	1.5748031496063	0	0	0	1.5748031496063
2011/01/22	NN1-7	4	d2		0	0	0	0	0	0	0	0	0	3.90625	0	0	0	0	2.34375	0	0	0	0	0	0	0	0	0	0	0	0	0	0	0	0	0	0	0	0	0	0	0	0	11.71875	0	0	0	0	7.8125
2011/01/22	NN1-7	4	d3		0	0	0	0	0	0	0	0	0	8.62068965517241	0	0	0	0	2.58620689655172	0	0	0	0	0	0	0	0	0	0	0	0	0	0	0	0	0	0	0	0	0	0	0	0	8.62068965517241	2.58620689655172	0	0	0	4.31034482758621
2011/01/22	NN1-7	4	d4		0	0	0	0	0	0	0	0	0	14.5631067961165	0	0	0	0	0	0	0	2.9126213592233	0	0	0	0	0	0	0	0	0	0	0	0	0	0	0	0	0	0	0	0	0	14.5631067961165	0	0	0	0	9.70873786407767
2011/01/22	NN8-14	11	d1		0	0	0	0	0	0	0	0	0	1.78571428571429	0	0	0	0	2.67857142857143	0	0	0	0	0	0	0	0	0	0	0	0	0	0	0	0	0	0	0	0	0	0	0	0	26.7857142857143	0	0	0	0	1.78571428571429
2011/01/22	NN8-14	11	d2		0	0	0	0	0	0	0	0	0	0	0	0	0	0	0	0	2.7027027027027	0	0	0	0	1.8018018018018	0	0	0	0	0	0	0	0	0	0	0	0	1.8018018018018	0	0	0	0	27.027027027027	0	0	0	0	0.900900900900901
2011/01/22	NN8-14	11	d3		0	0	0	0	0	0	0	0	0	0	0	0	0	0	0	0	0	0	0	0	0	4.62962962962963	0	0	0	0	0	0	0	0	0	0	0	0	0	0	0	0	0	18.5185185185185	0	0	0	0	0.925925925925926
2011/01/22	NN8-14	11	d4		0	0	0	0	0	0	0	0	0	0	0	0	0	0	0	0	0	0	0	0	0	4.62962962962963	0	0	0	0	0	0	0	0	0	0	0	0	0	0	0	0	0	13.8888888888889	0.925925925925926	0	0	0	1.85185185185185
2011/01/22	SE	2	d1		0	0	0	0	0	0	0	0	0	2.5	0	4.16666666666667	0	0	0	0	0	1.66666666666667	0	0	0	0	0	0	0	0	0	0	0	0	0	0	0	0	8.33333333333333	0	0	0	0	0	2.5	0	0	0	0
2011/01/22	SE	2	d2		0	2.85714285714286	0	0	0	0	0	0	0	0	0	28.5714285714286	0	0	0	0	0	0	0	0	0	0	0	0	0	0	0	0	0	0	0	0	0	0	9.52380952380952	0	0	0	0	0	0.952380952380952	0	0	0	0.952380952380952
2011/01/22	SE	2	d3		0	0	5.10204081632653	0	0	0	0	0	0	0	0	10.2040816326531	0	0	0	0	0	0	0	0	0	0	0	0	0	0	0	0	0	0	0	0	0	0	10.2040816326531	0	0	0	0	0	0	0	0	0	3.06122448979592
2011/01/22	SE	2	d4		0	0	0	0	0	0	0	0	0	0	0	17.8571428571429	0	0	0	0	0	0	0	0	0	0	0	0	0	0	0	0	0	0	0	0	0	4.46428571428571	0	0	0	0	0	0	4.46428571428571	0	0	0	1.78571428571429
2011/01/22	SW	2	d1		0	0	10.4166666666667	0	0	0	0	0	0	0	0	3.125	0	0	0	0	3.125	0	0	0	0	0	0	0	0	0	0	0	0	0	0	0	0	0	0	0	0	0	0	5.20833333333333	0	0	0	0	0
2011/01/22	SW	2	d2		0	0	9.61538461538462	0	0	0	0	0	0	0	0	11.5384615384615	0	0	0	0	2.88461538461538	0	0	0	0	0	0	0	0	0	0	0	0	0	0	0	0	0	0	0	0	0	0	9.61538461538462	1.92307692307692	0	0	0	1.92307692307692
2011/01/22	SW	2	d3		0	0	15.7894736842105	0	0	0	0	0	0	0	0	5.26315789473684	0	0	0	0	3.15789473684211	0	0	0	0	0	0	0	0	0	0	0	0	0	0	0	0	0	0	0	0	0	0	15.7894736842105	0	0	0	0	2.10526315789474
2011/01/22	SW	2	d4		0	0	20	0	0	0	0	0	0	0	0	15	0	0	0	0	3	0	0	0	0	0	0	0	0	0	0	0	0	0	0	0	0	0	0	0	0	0	0	10	0	0	0	0	2
2011/01/23	NN1-7	5	d1		0	0	0	0	0	0	0	0	0	4.67289719626168	0	0	0	0	0	0	0	0	0	0	0	0	0	0	0	0	0	0	0	0	0	0	0	0	0	0	0	0	0	9.34579439252336	1.86915887850467	0	0	0	4.67289719626168
2011/01/23	NN1-7	5	d2		0	0	0	0	0	0	0	0	0	1.81818181818182	0	0	0	0	0	0	0	0	0	0	0	0	0	0	0	0	0	0	0	0	0	0	0	0	0	0	0	0	0	13.6363636363636	0	0	0	0	2.72727272727273
2011/01/23	NN1-7	5	d3		0	0	0	0	0	0	0	0	0	4.54545454545455	0	0	0	0	0	0	0	0	0	0	0	0	0	0	0	0	0	0	0	0	0	0	0	0	0	0	0	0	0	4.54545454545455	0	0	0	0	0
2011/01/23	NN1-7	5	d4		0	0	0	0	0	0	0	0	0	4.85436893203883	0	0	0	0	0	0	0	0	0	0	0	0	0	0	0	0	0	0	0	0	0	0	0	0	0	0	0	0	0	4.85436893203883	0	0	0	0	2.9126213592233
2011/01/23	NN8-14	12	d1		0	0	0	0	0	0	0	0	0	0.862068965517241	0	0	0	0	4.31034482758621	0	0	0	0	0	0	0	0	0	0	0	0	0	0	0	0	0	0	0	0	0	0	0	0	25.8620689655172	1.72413793103448	0	0	0	1.72413793103448
2011/01/23	NN8-14	12	d2		0	0	0	0	0	0	0	0	0	0.961538461538462	0	0	0	0	0	0	0.961538461538462	0	0	0	0	0	0	0	0	0	0	0	0	0	0	0	0	0	0	0	0	0	0	19.2307692307692	0.961538461538462	0	0	0	9.61538461538462
2011/01/23	NN8-14	12	d3		0	0	0	0	0	0	0	0	0	0.884955752212389	0	0	0	0	0	0	0	0	0	0	0	0	0	0	0	0	0	0	0	0	0	0	0	0	1.76991150442478	0	0	0	0	13.2743362831858	4.42477876106195	0	0	0	13.2743362831858
2011/01/23	NN8-14	12	d4		0	0	0	0	0	0	0	0	0	0.970873786407767	0	0	0	0	0	0	0	0	0	0	0	0	0	0	0	0	0	0	0	0	0	0	0	0	0.970873786407767	0	0	0	0	4.85436893203883	0	0	0	0	19.4174757281553
2011/01/24	NN1-7	6	d1		0	0	0	0	0	0	0	0	0	1.86915887850467	0	0	0	0	0	0	0	0	0	0	0	0	0	0	0	0	0	0	0	0	0	0	0	0	0	0	0	0	0	2.80373831775701	1.86915887850467	0	0	0	2.80373831775701
2011/01/24	NN1-7	6	d2		0	0	0	0	0	0	0	0	0	2.72727272727273	0	0.909090909090909	0	0	0	0	0	0	0	0	0	0	0	0	0	0	0	0	0	0	0	0	0	0	0	0	0	0	0	4.54545454545455	2.72727272727273	0	0	0	2.72727272727273
2011/01/24	NN1-7	6	d3		0	0	0	0	0	0	0	0	0	2.85714285714286	0	0	0	0	0	0	0	0	0	0	0	0	0	0	0	0	0	0	0	0	0	0	0	0	0	0	0	0	0	4.76190476190476	0	0	0	0	1.9047619047619
2011/01/24	NN1-7	6	d4		0	0	0	0	0	0	0	0	0	2.52100840336134	0	0	0	0	0	0	0	1.68067226890756	0	0	0	0	0	0	0	0	0	0	0	0	0	0	0	0	0	0	0	0	0	0.840336134453782	0.840336134453782	0	0	0	1.68067226890756
2011/01/24	NN8-14	13	d1		0	0	0	0	0	0	0	0	0	2.52100840336134	0	0	0	0	2.52100840336134	0	0	0	0	0	0	0	0	0	0	0	0	0	0	0	4.20168067226891	0	0	0	1.68067226890756	0	0	0	0	4.20168067226891	1.68067226890756	0	0	0	2.52100840336134
2011/01/24	NN8-14	13	d2		0	0	0	0	0	0	0	0	0	0	0	0	0	0	0	0	2.65486725663717	0	0	0	0	0	0	0	0	0	0	0	0	0	0	0	0	0	2.65486725663717	0	0	0	0	8.84955752212389	2.65486725663717	0	0	0	2.65486725663717
2011/01/24	NN8-14	13	d3		3	0	0	0	0	0	0	0	0	2	0	0	0	0	0	0	0	0	0	0	0	0	0	2	0	0	0	0	0	0	0	0	0	0	5	0	0	0	0	5	3	0	0	0	15
2011/01/24	NN8-14	13	d4		2.9126213592233	0	0	0	0	0	0	0	0	0	0	0	0	0	0	0	0	0	0	0	0	0	0	0	0	0	0	0	0	0	0	0	0	0	4.85436893203883	0	0	0	0	1.94174757281553	2.9126213592233	0	0	0	19.4174757281553
2011/01/25	SE	3	d1		0	0	0	0	0	0	0	0	0	2.63157894736842	0	4.3859649122807	2.63157894736842	0	0	0	0	2.63157894736842	0	0	0	0	0	0	0	0	0	0	0	0	0	0	0	0	4.3859649122807	0	0	0	0	0	1.75438596491228	0	0	0	2.63157894736842
2011/01/25	SE	3	d2		0	2.88461538461538	0	0	0	0	0	0	0	4.80769230769231	0	4.80769230769231	2.88461538461538	0	0	0	0	1.92307692307692	0	0	0	0	0	0	0	0	0	0	0	0	0	0	0	0	9.61538461538462	0	0	0	0	0	0.961538461538462	0	0	0	0
2011/01/25	SE	3	d3		0	0	1.98019801980198	0	0	0	0	0	0	14.8514851485149	0	4.95049504950495	0	0	2.97029702970297	0	0	0	0	0	0	0	0	0	0	0	0	0	0	0	0	0	0	0	19.8019801980198	0	0	0	0	0	0.99009900990099	0	0	0	0
2011/01/25	SE	3	d4		0	0	0	0	0	0	0	0	0	9.43396226415094	0	4.71698113207547	0	0	0	0	0	0	0	0	0	0	0	0	0	0	0	0	0	0	0	0	0	0	0	0	0	0	0	0	0.943396226415094	0	0	0	0
2011/01/25	SW	3	d1		0	0	2.52100840336134	0	0	0	0	0	0	0	0	16.8067226890756	0	0.840336134453782	0	0	1.68067226890756	0	0	0	0	0	0	0	0	0	0	0	0	0	0	0	0	0	2.52100840336134	0	0	0	0	2.52100840336134	0.840336134453782	0	0	0	0.840336134453782
2011/01/25	SW	3	d2		0	0	0.943396226415094	0	0	0	0	0	0	0	0	14.1509433962264	0	0.943396226415094	0	0	1.88679245283019	0	0	0	0	0	0	0	0	0	0	0	0	0	0	0	0	0.943396226415094	14.1509433962264	0	0	0	0	4.71698113207547	0.943396226415094	0	0	0	0
2011/01/25	SW	3	d3		0	0	1.6	0	0	0	0	0	0	0	0	4	0	2.4	0	1.6	0	0	0	0	0	0	0	0	0	0	0	0	0	0	0	0	0	0	12	0	0	0	0	0	1.6	0	0	0	0.8
2011/01/25	SW	3	d4		0	0	2.56410256410256	0	0	0	0	0	0	0	0	12.8205128205128	0	4.27350427350427	0	0	1.70940170940171	0	0	0	0	0	0	0	0	0	0	0	0	0	0	0	0	0	1.70940170940171	0	0	0	0	0	1.70940170940171	4.27350427350427	0	0	2.56410256410256
2011/01/26	NN1-7	7	d1		0	0	0	0	0	0	0	0	0	1.94174757281553	0	0	29.126213592233	0	0	0	0	0	0	0	0	0	0	0	0	0	0	0	0	0	0	0	0	0	0	0	0	0	0	0.970873786407767	0	0	0	0	0
2011/01/26	NN1-7	7	d2		0	0	0	0	0	0	0	0	0	2.85714285714286	0	0	42.8571428571429	0	0	0	0	0	0	0	0	0	0	0	0	0	0	0	0	0	0	0	0	0	0	0	0	0	0	0	0	0	0	0	1.9047619047619
2011/01/26	NN1-7	7	d3		0	0	0	0	0	0	0	0	0	4.13223140495868	0	0	24.7933884297521	0	0	0	0	0	0	0	0	0	0	0	0	0	0	0	0	0	0	0	0	0	0	0	0	0	0	2.47933884297521	0	0	0	0	2.47933884297521
2011/01/26	NN1-7	7	d4		0	0	0	0	0	0	0	0	0	2.7027027027027	0	0	2.7027027027027	0	0	0	0	9.00900900900901	0	0	0	0	0	0	0	0	0	0	0	0	0	0	0	0	0	0	0	0	0	4.5045045045045	0	0	0	0	4.5045045045045
2011/01/26	NN8-14	14	d1		0	0	0	0	0	0	0	0	4.46428571428571	0	0	0	0	0	2.67857142857143	0	0	0	0	0	0	0	0	0.892857142857143	0	0	0	0	0	0	0	0	0	0	2.67857142857143	0	0	0	0	13.3928571428571	0	0	0	0	4.46428571428571
2011/01/26	NN8-14	14	d2		0	0	0	0	0	0	0	0	4.80769230769231	0	0	0	0	0	0	0	0.961538461538462	0	0	0	0	0	0	4.80769230769231	0.961538461538462	0	0	0	0	0	0	0	0	0	0.961538461538462	0	0	0	0	4.80769230769231	0	0	0	0	0
2011/01/26	NN8-14	14	d3		0	0	0	0	0	0	0	0	4.71698113207547	0	0	0	0	0	0	0	0	0	0	0	0	0	0	4.71698113207547	0	0	0	0	0	0	0	0	0	0	4.71698113207547	0	0	0	0	4.71698113207547	0	0	0	0	4.71698113207547
2011/01/26	NN8-14	14	d4		0	0	0	0	0	0	0	0	4.58715596330275	2.75229357798165	0	0	0	0	0	0	0	0	0	0	0	0	0	4.58715596330275	0	0	0	0	0	0	0	0	0	0	4.58715596330275	0	0	0	0	4.58715596330275	0	0	0	0	4.58715596330275
2011/01/26	SE	4	d1		0	0	0	0	0	0	0	0	0	4.27350427350427	0	2.56410256410256	1.70940170940171	0	0	0	0	0	0	0	0	0	0	0	0	0	0	0	0	0	0	0	0	0	2.56410256410256	0	0	0	0	1.70940170940171	1.70940170940171	0	0	0	0
2011/01/26	SE	4	d2		0	0	0	0	0	0	0	0	0	4.62962962962963	0	4.62962962962963	0	0	0	0	0	0	0	0	0	0	0	0	0	0	0	0	0	0	0	0	0	0	1.85185185185185	0	0	0	0	0	0	0	0	0	0
2011/01/26	SE	4	d3		0	0	2.54237288135593	0	0	0	0	0	0	1.69491525423729	0	8.47457627118644	8.47457627118644	0	0	0	0	0	0	0	0	0	0	0	0	0	0	0	0	0	0	0	0	0	8.47457627118644	0	0	0	0	2.54237288135593	2.54237288135593	0	0	0	1.69491525423729
2011/01/26	SE	4	d4		0	0	0	0	0	0	0	0	0	0	0	4.54545454545455	9.09090909090909	0	0	0	0	0	0	0	0	0	0	0	0	0	0	0	0	0	0	0	0	0	0	0	0	0	0	0.909090909090909	2.72727272727273	0	0	0	0.909090909090909
2011/01/26	SW	4	d1		0	0	1.0752688172043	0	0	0	0	0	0	0	0	0	0	0	0	0	0	0	0	0	0	0	0	0	0	0	0	0	0	0	0	0	0	0	5.37634408602151	0	0	0	0	5.37634408602151	1.0752688172043	0	0	0	0
2011/01/26	SW	4	d2		0	0	4.5045045045045	0	0	0	0	0	0	0	0	0	0	1.8018018018018	0	0	0	0	0	0	0	0	0	0	0	0	0	0	0	0	0	0	0	0	22.5225225225225	0	0	0	0	4.5045045045045	1.8018018018018	0	0	0	0
2011/01/26	SW	4	d3		0	0	4.3859649122807	0	0	0	0	0	0	0	0	0	0	1.75438596491228	0	0	0	0	0	0	0	0	0	0	0	0	0	0	0	0	0	0	0	0	8.7719298245614	0	0	0	0	4.3859649122807	0	0	0	0	0
2011/01/26	SW	4	d4		0	0	2.58620689655172	0	0	0	0	0	0	0	0	0	0	0	0	0	0	0	0	0	0	0	0	0	0	0	0	0	0	0	0	0	0	0	8.62068965517241	0	0	0	0	4.31034482758621	2.58620689655172	0	0	0	0
2011/02/07	NN1-7	1	d1		0	15.3061224489796	0	0	0	0	0	0	0	3.06122448979592	0	0	0	0	0	0	0	0	0	0	0	0	0	0	0	0	0	0	0	0	0	0	0	0	0	0	0	0	0	3.06122448979592	1.02040816326531	0	0	0	0
2011/02/07	NN1-7	1	d2		0	17.3913043478261	0	0	0	0	0	0	0	4.34782608695652	0	0	0	0	0	0	0	0	0	0	0	0	0	0	0	0	0	0	0	0	0	0	0	0	0	0	0	0	0	2.60869565217391	0	0.869565217391304	0	0	4.34782608695652
2011/02/07	NN1-7	1	d3		0	4.71698113207547	18.8679245283019	0	0	0	0	0	0	9.43396226415094	0	0	0	0	0	0	0	0	0	0	0	0	0	0	0	0	0	0	0	0	0	0	0	0	0	0	0	0	0	4.71698113207547	0	0	0	0	0.943396226415094
2011/02/07	NN1-7	1	d4		0	0	30.9278350515464	0	0	0	0	0	0	5.15463917525773	0	0	0	0	0	0	0	0	0	0	0	0	0	0	0	0	0	0	0	0	0	0	0	0	0	0	0	0	0	15.4639175257732	1.03092783505155	0	0	0	1.03092783505155
2011/02/07	NN1-7	2	d1		0	9.9009900990099	0	0	0	0	0	0	0	2.97029702970297	0	0	0	0	0	0	0	0	0	0	0	0	0	0	0	0	0	0	0	0	0	0	0	0	0	0	0	0	0	0.99009900990099	0.99009900990099	0	0	0	0
2011/02/07	NN1-7	2	d2		0	13.8888888888889	0	0	0	0	0	0	0	4.62962962962963	0	0	0	0	0	0	0	0	0	0	0	0	0	0	0	0	0	0	0	0	0	0	0	0	0	0	0	0	0	0.925925925925926	0.925925925925926	0	0	0	0.925925925925926
2011/02/07	NN1-7	2	d3		0	5.20833333333333	15.625	0	0	0	0	0	0	5.20833333333333	0	0	0	0	0	0	0	0	0	0	0	0	0	0	0	0	0	0	0	0	0	0	0	0	0	0	0	0	0	5.20833333333333	0	0	0	0	1.04166666666667
2011/02/07	NN1-7	2	d4		0	0	24.5098039215686	0	0	0	0	0	0	4.90196078431373	0	0	0	0	0	0	0	0	0	0	0	0	0	0	0	0	0	0	0	0	0	0	0	0	0	0	0	0	0	4.90196078431373	0.980392156862745	0	0	0	0.980392156862745
2011/02/07	NN8-14	8	d1		0	0	0	0	0	0	0	0	0	4.46428571428571	0	0	4.46428571428571	0	0	0	0	0	0	0	0	8.92857142857143	0	0	0	0	0	0	0	0	0	0	0	0	0	0	0	0	0	0.892857142857143	0.892857142857143	0	0	0	4.46428571428571
2011/02/07	NN8-14	8	d2		0	0	0	0	0	0	0	0	0	3	0	0	5	0	0	0	0	0	0	0	0	1	0	0	0	0	0	0	0	0	0	0	0	0	0	0	0	0	0	3	3	0	0	0	15
2011/02/07	NN8-14	8	d3		0	0	0	0	0	0	0	0	0	2.60869565217391	0	0	4.34782608695652	0	0	0	0	1.73913043478261	0	0	0	0	0	0	0	0	0	0	0	0	0	0	0	0	0	0	0	0	0	8.69565217391304	0	0	0	0	8.69565217391304
2011/02/07	NN8-14	8	d4		0	0	0	0	0	0	0	0	0	0	0	0	0	0	0	0	0	4.5045045045045	0	0	0	0	0	0	0	0	0	0	0	0	0	0	0	0	0	0	0	0	0	0	0	0.900900900900901	0	0	4.5045045045045
2011/02/07	NN8-14	9	d1		0	0	0	0	0	0	0	0	0	0.970873786407767	0	0	0	0	0	0	0	0	0	0	0	0	0	0	0	0	0	0	0	0	0	0	0	0	0.970873786407767	0	0	0	0	9.70873786407767	0.970873786407767	0	0	0	4.85436893203883
2011/02/07	NN8-14	9	d2		0	0	0	0	0	0	0	0	0	4.03225806451613	0	0	0	0	0	0	0	0	0	0	0	0	0	0	0	0	0	0	0	0	0	0	0	0	0.806451612903226	0	0	0	0	4.03225806451613	0.806451612903226	0	0	0	0.806451612903226
2011/02/07	NN8-14	9	d3		0	0	0	0	0	0	0	0	0	0.980392156862745	0	0	0	0	0	0	0	0	0	0	0	0	0	0	0	0	0	0	0	0	0	0	0	0	0.980392156862745	0	0	0	0	9.80392156862745	0	0	0	0	14.7058823529412
2011/02/07	NN8-14	9	d4		0	0	0	0	0	0	0	0	0	0.961538461538462	0	0	0	0	0	0	0	0	0	0	0	0	0	0	0	0	0	0	0	0	0	0	0	0	0.961538461538462	0	0	0	0	1.92307692307692	1.92307692307692	0	0	0	2.88461538461538
2011/02/07	SE	1	d1		0	0	0	0	0	0	0	0	0	0	0	2.83018867924528	0	0	0	0	0	1.88679245283019	0	0	0	0	0	0	0	0	0	0	0	0	0	0	0	0	0	0	0	0	0	0	2.83018867924528	0	0	0	2.83018867924528
2011/02/07	SE	1	d2		0	0	0	0	0	0	0	0	0	0	0	2.67857142857143	0	0	0	0	0	2.67857142857143	0	0	0	0	0	0	0	0	0	4.46428571428571	0	0	0	0	0	0	0	0	0	0	0	0	2.67857142857143	0	0	0	2.67857142857143
2011/02/07	SE	1	d3		0	0	0	0	0	0	0	0	0	0	0	2.63157894736842	0	0	0	1.75438596491228	1.75438596491228	2.63157894736842	0	0	0	0	0	0	0	0	0	0	0	0	0	0	0	0	0	0	0	0	0	0	0	0.87719298245614	0	0	2.63157894736842
2011/02/07	SE	1	d4		0	0	0	0	0	0	0	0	0	0	0	2.77777777777778	0	0	0	1.85185185185185	1.85185185185185	2.77777777777778	0	0	0	0	0	0	0	0	0	0	0	0	0	0	0	0	0	0	0	0	0	0	2.77777777777778	0	0	0	0
2011/02/08	NN1-7	3	d1		0	14.1509433962264	0	0	0	0	0	0	0	4.71698113207547	0	0	0	0	0	0	0	0	0	0	0	0	0	0	0	0	0	0	0	0	0	0	0	0	0	0	0	0	0	2.83018867924528	1.88679245283019	0	0	0	4.71698113207547
2011/02/08	NN1-7	3	d2		0	12.9310344827586	0	0	0	0	0	0	0	4.31034482758621	0	0	0	0	0	0	0	0	0	0	0	0	0	0	0	0	0	0	0	0	0	0	0	0	0	0	0	0	0	2.58620689655172	1.72413793103448	0	0	0	2.58620689655172
2011/02/08	NN1-7	3	d3		0	4.58715596330275	27.5229357798165	0	0	0	0	0	0	2.75229357798165	0	0	0	0	0	0	0	0	0	0	0	0	0	0	0	0	0	0	0	0	0	0	0	0	0	0	0	0	0	4.58715596330275	0.917431192660551	0	0	0	4.58715596330275
2011/02/08	NN1-7	3	d4		0	0	25.8620689655172	0	0	0	0	0	0	2.58620689655172	0	0	0	0	0	0	0	0	0	0	0	0	0	0	0	0	0	0	0	0	0	0	0	0	0	0	0	0	0	8.62068965517241	2.58620689655172	0	0	0	4.31034482758621
2011/02/08	NN8-14	10	d1		0	0	0	0	0	0	0	0	0	1.9047619047619	0	0	0	0	2.85714285714286	0	0	0	0	0	0	0	0	0	0	0	0	0	0	0	0	0	0	0	2.85714285714286	0	0	0	0	9.52380952380952	4.76190476190476	0	0	0	1.9047619047619
2011/02/08	NN8-14	10	d2		0	0	0	0	0	0	0	0	0	1.88679245283019	0	0	0	0	0	0	0	0	0	0	0	0	0	0	0	0	0	0	0	0	0	0	0	0	0.943396226415094	0	0	0	0	9.43396226415094	1.88679245283019	0	0	0	2.83018867924528
2011/02/08	NN8-14	10	d3		0	0	0	0	0	0	0	0	0	1.98019801980198	0	0	0	0	0	0	0	0	0	0	0	0	0	0	0	0	0	0	0	0	0	0	0	0	0.99009900990099	0	0	0	0	9.9009900990099	1.98019801980198	0	0	0	9.9009900990099
2011/02/08	NN8-14	10	d4		0	0	0	0	0	0	0	0	0	2.75229357798165	0	0	0	0	0	0	0	0	0	0	0	0.917431192660551	0	0	0	0	0	0	0	0	0	0	0	0	0.917431192660551	0	0	0	0	9.1743119266055	0.917431192660551	0	0	0	4.58715596330275
2011/02/08	SE	2	d1		0	0	0	0	0	0	0	0	0	1.9047619047619	0	4.76190476190476	0	0	0	0	0	0	0	0	0	0	0	0	0	0	0	0	0	0	0	0	0	0	4.76190476190476	0	0	0	0	0	2.85714285714286	0	0	0	0
2011/02/08	SE	2	d2		0	1.92307692307692	0	0	0	0	0	0	0	0	0	9.61538461538462	0	0	0	0	0	0	0	0	0	0	0	0	0	0	0	0	0	0	0	0	0	0	4.80769230769231	0	0	0	0	0	0	0	0	0	1.92307692307692
2011/02/08	SE	2	d3		0	0	9.52380952380952	0	0	0	0	0	0	0	0	4.76190476190476	0	0	0	0	0	0	0	0	0	0	0	0	0	0	0	0	0	0	0	0	0	0	4.76190476190476	0	0	0	0	1.9047619047619	0	0	0	0	2.85714285714286
2011/02/08	SE	2	d4		0	0	0	0	0	0	0	0	0	0	0	17.0940170940171	0	0	0	0	0	0	0	0	0	0	0	0	0	0	0	0	0	0	0	0	0	0	0	0	0	0	0	0	4.27350427350427	0	0	0	1.70940170940171
2011/02/08	SW	2	d1		0	0	9.1743119266055	0	0	0	0	0	0	0	0	2.75229357798165	0	0	0	0	2.75229357798165	0	0	0	0	0	0	0	0	0	0	0	0	0	0	0	0	0	0	0	0	0	0	4.58715596330275	0	0	0	0	2.75229357798165
2011/02/08	SW	2	d2		0	0	19.047619047619	0	0	0	0	0	0	0	0	14.2857142857143	0	0	0	0	2.85714285714286	0	0	0	0	0	0	0	0	0	0	0	0	0	0	0	0	0	0	0	0	0	0	2.85714285714286	0.952380952380952	0	0	0	2.85714285714286
2011/02/08	SW	2	d3		0	0	18.5185185185185	0	0	0	0	0	0	0	0	4.62962962962963	0	0	0	0	1.85185185185185	0	0	0	0	0	0	0	0	0	0	0	0	0	0	0	0	0	0	0	0	0	0	4.62962962962963	0	0	0	0	0.925925925925926
2011/02/08	SW	2	d4		0	0	24.0384615384615	0	0	0	0	0	0	0	0	9.61538461538462	0	0	0	0	1.92307692307692	0	0	0	0	0	0	0	0	0	0	0	0	0	0	0	0	0	0	0	0	0	0	4.80769230769231	0	0	0	0	1.92307692307692
2011/02/10	NN1-7	4	d1		0	0	0	0	0	0	0	0	0	4.31034482758621	0	0	0	0	2.58620689655172	0	0	0	0	0	0	0	0	0	0	0	0	0	0	0	0	0	0	0	0	0	0	0	0	4.31034482758621	2.58620689655172	0	0	0	4.31034482758621
2011/02/10	NN1-7	4	d2		0	0	0	0	0	0	0	0	0	4.46428571428571	0	0	0	0	2.67857142857143	0	0	0	0	0	0	0	0	0	0	0	0	0	0	0	0	0	0	0	0	0	0	0	0	2.67857142857143	2.67857142857143	0	0	0	2.67857142857143
2011/02/10	NN1-7	4	d3		0	0	0	0	0	0	0	0	0	4.23728813559322	0	0	0	0	2.54237288135593	0	0	0	0	0	0	0	0	0	0	0	0	0	0	0	0	0	0	0	0	0	0	0	0	4.23728813559322	1.69491525423729	0	0	0	8.47457627118644
2011/02/10	NN1-7	4	d4		0	0	0	0	0	0	0	0	0	4.62962962962963	0	0	0	0	2.77777777777778	0	0	0	0	0	0	0	0	0	0	0	0	0	0	0	0	0	0	0	0	0	0	0	0	4.62962962962963	0	0	0	0	9.25925925925926
2011/02/10	NN1-7	5	d1		0	0	0	0	0	0	0	0	0	4.67289719626168	0	0	0	0	0	0	0	0	0	0	0	0	0	0	0	0	0	0	0	0	0	0	0	0	0	0	0	0	0	4.67289719626168	1.86915887850467	0	0	0	4.67289719626168
2011/02/10	NN1-7	5	d2		0	0	0	0	0	0	0	0	0	1.86915887850467	0	0	0	0	0	0	0	0	0	0	0	0	0	0	0	0	0	0	0	0	0	0	0	0	0	0	0	0	0	4.67289719626168	0	0	0	0	4.67289719626168
2011/02/10	NN1-7	5	d3		0	0	0	0	0	0	0	0	0	4.80769230769231	0	0	0	0	0	0	0	0	0	0	0	0	0	0	0	0	0	0	0	0	0	0	0	0	0	0	0	0	0	2.88461538461538	0.961538461538462	0	0	0	0
2011/02/10	NN1-7	5	d4		0	0	0	0	0	0	0	0	0	4.67289719626168	0	0	0	0	0	0	0	0	0	0	0	0	0	0	0	0	0	0	0	0	0	0	0	0	0	0	0	0	0	1.86915887850467	0	0	0	0	4.67289719626168
2011/02/10	NN8-14	11	d1		0	0	0	0	0	0	0	0	0	0.909090909090909	0	0	0	0	2.72727272727273	0	0	0	0	0	0	0.909090909090909	0	0	0	0	0	0	0	0	0	0	0	0	0.909090909090909	0	0	0	0	9.09090909090909	0	0	0	0	1.81818181818182
2011/02/10	NN8-14	11	d2		0	0	0	0	0	0	0	0	0	0	0	0	0	0	0	0	0.952380952380952	0	0	0	0	0.952380952380952	0	0	0	0	0	0	0	0	0	0	0	0	0.952380952380952	0	0	0	0	19.047619047619	0	0	0	0	0.952380952380952
2011/02/10	NN8-14	11	d3		0	0	0	0	0	0	0	0	0	0	0	0	0	0	0	0	0	0	0	0	0	4.90196078431373	0	0	0	0	0	0	0	0	0	0	0	0	0.980392156862745	0	0	0	0	9.80392156862745	0	0	0	0	0.980392156862745
2011/02/10	NN8-14	11	d4		0	0	0	0	0	0	0	0	0	0	0	0	0	0	0	0	0	0	0	0	0	4.58715596330275	0	0	0	0	0	0	0	0	0	0	0	0	0.917431192660551	0	0	0	0	9.1743119266055	0	0	0	0	2.75229357798165
2011/02/10	NN8-14	12	d1		0	0	0	0	0	0	0	0	0	1.81818181818182	0	0	0	0	2.72727272727273	0	0	0	0	0	0	0	0	0	0	0	0	0	0	0	0	0	0	0	0.909090909090909	0	0	0	0	18.1818181818182	0	0	0	0	2.72727272727273
2011/02/10	NN8-14	12	d2		0	0	0	0	0	0	0	0	0	1.9047619047619	0	0	0	0	0	0	0.952380952380952	0	0	0	0	0	0	0	0	0	0	0	0	0	0	0	0	0	0.952380952380952	0	0	0	0	14.2857142857143	0	0	0	0	9.52380952380952
2011/02/10	NN8-14	12	d3		0	0	0	0	0	0	0	0	0	0.961538461538462	0	0	0	0	0	0	0	0	0	0	0	0	0	0	0	0	0	0	0	0	0	0	0	0	2.88461538461538	0	0	0	0	9.61538461538462	0	0	0	0	19.2307692307692
2011/02/10	NN8-14	12	d4		0	0	0	0	0	0	0	0	0	2.63157894736842	0	0	0	0	0	0	0	0	0	0	0	0	0	0	0	0	0	0	0	0	0	0	0	0	0.87719298245614	0	0	0	0	4.3859649122807	0	0	0	0	17.5438596491228
2011/02/10	SE	3	d1		0	0	0	0	0	0	0	0	0	4.80769230769231	0	4.80769230769231	2.88461538461538	0	0	0	0	0	0	0	0	0	0	0	0	0	0	0	0	0	0	0	0	0	4.80769230769231	0	0	0	0	0.961538461538462	0	0	0	0	0
2011/02/10	SE	3	d2		0	2.88461538461538	0	0	0	0	0	0	0	4.80769230769231	0	2.88461538461538	2.88461538461538	0	0	0	0	0	0	0	0	0	0	0	0	0	0	0	0	0	0	0	0	0	4.80769230769231	0	0	0	0	0	0	0	0	0	0
2011/02/10	SE	3	d3		0	0	4.46428571428571	0	0	0	0	0	0	8.92857142857143	0	13.3928571428571	0	0	0	0	0	0	0	0	0	0	0	0	0	0	0	0	0	0	0	0	0	0	17.8571428571429	0	0	0	0	0	1.78571428571429	0	0	0	0
2011/02/10	SE	3	d4		0	0	0	0	0	0	0	0	0	9.25925925925926	0	4.62962962962963	2.77777777777778	0	0	0	0	0	0	0	0	0	0	0	0	0	0	0	0	0	0	0	0	0	0	0	0	0	0	0	1.85185185185185	0	0	0	0
2011/02/10	SW	3	d1		0	0	1.92307692307692	0	0	0	0	0	0	0	0	19.2307692307692	0	0.961538461538462	0	0	1.92307692307692	0	0	0	0	0	0	0	0	0	0	0	0	0	0	0	0	0	2.88461538461538	0	0	0	0	4.80769230769231	0	0	0	0	0.961538461538462
2011/02/10	SW	3	d2		0	0	0.840336134453782	0	0	0	0	0	0	0	0	4.20168067226891	0	0	0	0	1.68067226890756	0	0	0	0	0	0	0	0	0	0	0	0	0	0	0	0	0	21.0084033613445	0	0	0	0	2.52100840336134	0	0	0	0	0
2011/02/10	SW	3	d3		0	0	4.90196078431373	0	0	0	0	0	0	0	0	0	0	2.94117647058824	0	0	2.94117647058824	0	0	0	0	0	0	0	0	0	0	0	0	0	0	0	0	0	9.80392156862745	0	0	0	0	2.94117647058824	4.90196078431373	0	0	0	1.96078431372549
2011/02/10	SW	3	d4		0	0	4.80769230769231	0	0	0	0	0	0	0	0	4.80769230769231	0	4.80769230769231	0	0	0.961538461538462	0	0	0	0	0	0	0	0	0	0	0	0	0	0	0	0	0	4.80769230769231	0	0	0	0	2.88461538461538	1.92307692307692	0	0	0	2.88461538461538
2011/02/13	NN1-7	6	d1		0	0	0	0	0	0	0	0	0	2.83018867924528	0	0	0	0	0	0	0	0	0	0	0	0	0	0	0	0	0	0	0	0	0	0	0	0	0	0	0	0	0	0	4.71698113207547	0	0	0	4.71698113207547
2011/02/13	NN1-7	6	d2		0	0	0	0	0	0	0	0	0	2.63157894736842	0	0	0	0	0	0	0	0	0	0	0	0	0	0	0	0	0	0	0	0	0	0	0	0	0	0	0	0	0	4.3859649122807	2.63157894736842	0	0	0	2.63157894736842
2011/02/13	NN1-7	6	d3		0	0	0	0	0	0	0	0	0	2.83018867924528	0	0	0	0	0	0	0	0	0	0	0	0	0	0	0	0	0	0	0	0	0	0	0	0	0	0	0	0	0	2.83018867924528	0	0	0	0	0
2011/02/13	NN1-7	6	d4		0	0	0	0	0	0	0	0	0	2.77777777777778	0	0	0	0	0	0	0	2.77777777777778	0	0	0	0	0	0	0	0	0	0	0	0	0	0	0	0	0	0	0	0	0	0	0.925925925925926	0	0	0	0.925925925925926
2011/02/13	NN1-7	7	d1		0	0	0	0	0	0	0	0	0	2.80373831775701	0	0	28.0373831775701	0	0	0	0	0	0	0	0	0	0	0	0	0	0	0	0	0	0	0	0	0	0	0	0	0	0	2.80373831775701	0.934579439252336	0	0	0	2.80373831775701
2011/02/13	NN1-7	7	d2		0	0	0	0	0	0	0	0	0	2.9126213592233	0	0	58.252427184466	0	0	0	0	0	0	0	0	0	0	0	0	0	0	0	0	0	0	0	0	0	0	0	0	0	0	2.9126213592233	0	0	0	0	1.94174757281553
2011/02/13	NN1-7	7	d3		0	0	0	0	0	0	0	0	0	2.9126213592233	0	38.8349514563107	0	0	0	0	0	0	0	0	0	0	0	0	0	0	0	0	0	0	0	0	0	0	0	0	0	0	0	1.94174757281553	0	0	0	0	2.9126213592233
2011/02/13	NN1-7	7	d4		0	0	0	0	0	0	0	0	0	8.33333333333333	0	0	4.16666666666667	0	0	0	0	8.33333333333333	0	0	0	0	0	0	0	0	0	0	0	0	0	0	0	0	0	0	0	0	0	4.16666666666667	0	0	0	0	4.16666666666667
2011/02/13	NN8-14	13	d1		0	0	0	0	0	0	0	0	0	2.72727272727273	0	0	0	0	2.72727272727273	0	0	0	0	0	0	0	0	0	0	0	0	0	0	0	0	0	0	0	1.81818181818182	0	0	0	0	2.72727272727273	0	0	0	0	2.72727272727273
2011/02/13	NN8-14	13	d2		0	0	0	0	0	0	0	0	0	4.5045045045045	0	0	0	0	0	0	1.8018018018018	0	0	0	0	0	0	0	0	0	0	0	0	0	0	0	0	0	2.7027027027027	0	0	0	0	9.00900900900901	0	0	0	0	2.7027027027027
2011/02/13	NN8-14	13	d3		2.65486725663717	0	0	0	0	0	0	0	0	2.65486725663717	0	0	0	0	0	0	0	0	0	0	0	0	0	0	0	0	0	0	0	0	0	0	0	0	4.42477876106195	0	0	0	0	1.76991150442478	2.65486725663717	0	0	0	17.6991150442478
2011/02/13	NN8-14	13	d4		2.88461538461538	0	0	0	0	0	0	0	0	0	0	0	0	0	0	0	0	0	0	0	0	0	0	0	0	0	0	0	0	0	0	0	0	0	4.80769230769231	0	0	0	0	2.88461538461538	0	0	0	0	24.0384615384615
2011/02/13	NN8-14	14	d1		0	0	0	0	0	0	0	0	9.43396226415094	0	0	0	0	0	2.83018867924528	0	0	0	0	0	0	0	0	0	0	0	0	0	0	0	0	0	0	0	4.71698113207547	0	0	0	0	14.1509433962264	2.83018867924528	0	0	0	4.71698113207547
2011/02/13	NN8-14	14	d2		0	0	0	0	0	0	0	0	9.80392156862745	0	0	0	0	0	0	0	0.980392156862745	0	0	0	0	0	0	4.90196078431373	0	0	0	0	0	0	0	0	0	0	2.94117647058824	0	0	0	0	2.94117647058824	0	0	0	0	0
2011/02/13	NN8-14	14	d3		0	0	0	0	0	0	0	0	4.58715596330275	0	0	0	0	0	0	0	0	0	0	0	0	0	0	2.75229357798165	0	0	0	0	0	0	0	0	0	0	4.58715596330275	0	0	0	0	2.75229357798165	0	0	0	0	4.58715596330275
2011/02/13	NN8-14	14	d4		0	0	0	0	0	0	0	0	4.95049504950495	2.97029702970297	0	0	0	0	0	0	0	0	0	0	0	0	0	4.95049504950495	0	0	0	0	0	0	0	0	0	0	4.95049504950495	0	0	0	0	4.95049504950495	0	0	0	0	2.97029702970297
2011/02/13	SE	4	d1		0	0	0	0	0	0	0	0	0	4.34782608695652	0	2.60869565217391	2.60869565217391	0	0	0	0	0	0	0	0	0	0	0	0	0	0	0	0	0	0	0	0	0	2.60869565217391	0	0	0	0	2.60869565217391	2.60869565217391	0	0	0	0
2011/02/13	SE	4	d2		0	0	0	0	0	0	0	0	0	1.85185185185185	0	2.77777777777778	0	0	0	0	0	0	0	0	0	0	0	0	0	0	0	0	0	0	0	0	0	0	2.77777777777778	0	0	0	0	2.77777777777778	1.85185185185185	0	0	0	0
2011/02/13	SE	4	d3		0	0	9.1743119266055	0	0	0	0	0	0	0	0	9.1743119266055	0	0	0	0	0	0	0	0	0	0	0	0	0	0	0	0	0	0	0	0	0	0	9.1743119266055	0	0	0	0	1.8348623853211	1.8348623853211	0	0	0	0
2011/02/13	SE	4	d4		0	0	0	0	0	0	0	0	0	0	0	8.33333333333333	8.33333333333333	0	0	0	0	0	0	0	0	0	0	0	0	0	0	0	0	0	0	0	0	0	0	0	0	0	0	1.66666666666667	2.5	0	0	0	0
2011/02/13	SW	4	d1		0	0	1.86915887850467	0	0	0	0	0	0	0	0	0	0	0	0	0	0	0	0	0	0	0	0	0	0	0	0	0	0	0	0	0	0	0	4.67289719626168	0	0	0	0	1.86915887850467	2.80373831775701	0	0	0	0
2011/02/13	SW	4	d2		0	0	1.88679245283019	0	0	0	0	0	0	0	0	0	0	1.88679245283019	0	0	0	0	0	0	0	0	0	0	0	0	0	0	0	0	0	0	0	0	18.8679245283019	0	0	0	0	1.88679245283019	2.83018867924528	0	0	0	0
2011/02/13	SW	4	d3		0	0	2.75229357798165	0	0	0	0	0	0	0	0	0	0	1.8348623853211	0	0	0	0	0	0	0	0	0	0	0	0	0	0	0	0	0	0	0	0	18.348623853211	0	0	0	0	4.58715596330275	0	0	0	0	0
2011/02/13	SW	4	d4		0	0	2.54237288135593	0	0	0	0	0	0	0	0	0	0	1.69491525423729	0	0	0	0	0	0	0	0	0	0	0	0	0	0	0	0	0	0	0	0	12.7118644067797	0	0	0	0	4.23728813559322	1.69491525423729	0	0	0	0
2011/02/16	NN1-7	1	d1		0	24.2718446601942	0	0	0	0	0	0	0	2.9126213592233	0	0	0	0	0	0	0	0	0	0	0	0	0	0	0	0	0	0	0	0	0	0	0	0	0	0	0	0	0	2.9126213592233	0	0	0	0	0
2011/02/16	NN1-7	1	d2		0	29.7029702970297	0	0	0	0	0	0	0	4.95049504950495	0	0	0	0	0	0	0	0	0	0	0	0	0	0	0	0	0	0	0	0	0	0	0	0	0	0	0	0	0	4.95049504950495	1.98019801980198	2.97029702970297	0	0	4.95049504950495
2011/02/16	NN1-7	1	d3		0	9.52380952380952	19.047619047619	0	0	0	0	0	0	4.76190476190476	0	0	0	0	0	0	0	0	0	0	0	0	0	0	0	0	0	0	0	0	0	0	0	0	0	0	0	0	0	4.76190476190476	0	0	0	0	4.76190476190476
2011/02/16	NN1-7	1	d4		0	0	24.0384615384615	0	0	0	0	0	0	4.80769230769231	0	0	0	0	0	0	0	0	0	0	0	0	0	0	0	0	0	0	0	0	0	0	0	0	0	0	0	0	0	9.61538461538462	0.961538461538462	0	0	0	2.88461538461538
2011/02/16	NN8-14	8	d1		0	0	0	0	0	0	0	0	0	4.71698113207547	0	0	2.83018867924528	0	0	0	0	0	0	0	0	4.71698113207547	0	0	0	0	0	0	0	0	0	0	0	0	0	0	0	0	0	0	2.83018867924528	0	0	0	4.71698113207547
2011/02/16	NN8-14	8	d2		0	0	0	0	0	0	0	0	0	2.75229357798165	0	0	4.58715596330275	0	0	0	0	0	0	0	0	2.75229357798165	0	0	0	0	0	0	0	0	0	0	0	0	0	0	0	0	0	4.58715596330275	2.75229357798165	0	0	0	13.7614678899083
2011/02/16	NN8-14	8	d3		0	0	0	0	0	0	0	0	0	2.9126213592233	0	0	0	0	0	0	0	0	0	0	0	0	0	0	0	0	0	0	0	0	0	0	0	0	0	0	0	0	0	9.70873786407767	0	0	0	0	9.70873786407767
2011/02/16	NN8-14	8	d4		0	0	0	0	0	0	0	0	0	0	0	0	0	0	0	0	0	9.70873786407767	0	0	0	0	0	0	0	0	0	0	0	0	0	0	0	0	0	0	0	0	0	2.9126213592233	0	0	0	0	4.85436893203883
2011/02/18	NN1-7	2	d1		0	17.8571428571429	0	0	0	0	0	0	0	4.46428571428571	0	0	0	0	0	0	0	0	0	0	0	0	0	0	0	0	0	0	0	0	0	0	0	0	0	0	0	0	0	2.67857142857143	2.67857142857143	0	0	0	0.892857142857143
2011/02/18	NN1-7	2	d2		0	17.8571428571429	0	0	0	0	0	0	0	4.46428571428571	0	0	0	0	0	0	0	0	0	0	0	0	0	0	0	0	0	0	0	0	0	0	0	0	0	0	0	0	0	0	4.46428571428571	0	0	0	1.78571428571429
2011/02/18	NN1-7	2	d3		0	10.8695652173913	16.304347826087	0	0	0	0	0	0	5.43478260869565	0	0	0	0	0	0	0	0	0	0	0	0	0	0	0	0	0	0	0	0	0	0	0	0	0	0	0	0	0	5.43478260869565	10.8695652173913	0	0	0	2.17391304347826
2011/02/18	NN1-7	2	d4		0	0	28.5714285714286	0	0	0	0	0	0	9.52380952380952	0	0	0	0	0	0	0	0	0	0	0	0	0	0	0	0	0	0	0	0	0	0	0	0	0	0	0	0	0	4.76190476190476	1.9047619047619	0	0	0	2.85714285714286
2011/02/18	NN8-14	9	d1		0	0	0	0	0	0	0	0	0	0	0	0	0	0	0	0	0	0	0	0	0	0	0	0	0	0	0	0	0	0	0	0	0	0	1.96078431372549	0	0	0	0	9.80392156862745	4.90196078431373	0	0	0	9.80392156862745
2011/02/18	NN8-14	9	d2		0	0	0	0	0	0	0	0	0	0	0	0	0	0	0	0	0	0	0	0	0	0	0	0	0	0	0	0	0	0	0	0	0	0	2.88461538461538	0	0	0	0	4.80769230769231	2.88461538461538	0	0	0	2.88461538461538
2011/02/18	NN8-14	9	d3		0	0	0	0	0	0	0	0	0	4.85436893203883	0	0	0	0	0	0	0	0	0	0	0	0	0	0	0	0	0	0	0	0	0	0	0	0	2.9126213592233	0	0	0	0	9.70873786407767	0	0	0	0	9.70873786407767
2011/02/18	NN8-14	9	d4		0	0	0	0	0	0	0	0	0	4.80769230769231	0	0	0	0	0	0	0	0	0	0	0	0	0	0	0	0	0	0	0	0	0	0	0	0	0.961538461538462	0	0	0	0	4.80769230769231	2.88461538461538	0	0	0	4.80769230769231
2011/02/22	NN1-7	3	d1		0	20.4081632653061	0	0	0	0	0	0	0	3.06122448979592	0	0	0	0	0	0	0	0	0	0	0	0	0	0	0	0	0	0	0	0	0	0	0	0	0	0	0	0	0	5.10204081632653	0	0	0	0	5.10204081632653
2011/02/22	NN1-7	3	d2		0	19.4174757281553	0	0	0	0	0	0	0	2.9126213592233	0	0	0	0	0	0	0	0	0	0	0	0	0	0	0	0	0	0	0	0	0	0	0	0	0	0	0	0	0	4.85436893203883	0	0	0	0	4.85436893203883
2011/02/22	NN1-7	3	d3		0	9.9009900990099	29.7029702970297	0	0	0	0	0	0	4.95049504950495	0	0	0	0	0	0	0	0	0	0	0	0	0	0	0	0	0	0	0	0	0	0	0	0	0	0	0	0	0	4.95049504950495	0.99009900990099	0	0	0	4.95049504950495
2011/02/22	NN1-7	3	d4		0	0	28.0373831775701	0	0	0	0	0	0	2.80373831775701	0	0	0	0	0	0	0	0	0	0	0	0	0	0	0	0	0	0	0	0	0	0	0	0	0	0	0	0	0	9.34579439252336	0.934579439252336	0	0	0	2.80373831775701
2011/02/22	NN8-14	10	d1		0	0	0	0	0	0	0	0	0	2.58620689655172	0	0	0	0	2.58620689655172	0	0	0	0	0	0	0	0	0	0	0	0	0	0	0	0	0	0	0	0.862068965517241	0	0	0	0	8.62068965517241	2.58620689655172	0	0	0	2.58620689655172
2011/02/22	NN8-14	10	d2		0	0	0	0	0	0	0	0	0	2.72727272727273	0	0	0	0	0	0	0	0	0	0	0	0	0	0	0	0	0	0	0	0	0	0	0	0	0.909090909090909	0	0	0	0	4.54545454545455	0	0	0	0	2.72727272727273
2011/02/22	NN8-14	10	d3		0	0	0	0	0	0	0	0	0	0.952380952380952	0	0	0	0	0	0	0	0	0	0	0	0	0	0	0	0	0	0	0	0	0	0	0	0	0.952380952380952	0	0	0	0	4.76190476190476	0	0	0	0	9.52380952380952
2011/02/22	NN8-14	10	d4		0	0	0	0	0	0	0	0	0	4.62962962962963	0	0	0	0	0	0	0	0	0	0	0	0	0	0	0	0	0	0	0	0	0	0	0	0	0	0	0	0	0	9.25925925925926	0	0	0	0	4.62962962962963
2011/02/22	SE	1	d1		0	0	0	0	0	0	0	0	0	0	0	2.67857142857143	0	0	0	0	0	1.78571428571429	0	0	0	0	0	0	0	0	0	0	0	0	0	0	0	0	0	0	0	0	0	2.67857142857143	2.67857142857143	0	0	0	2.67857142857143
2011/02/22	SE	1	d2		0	0	0	0	0	0	0	0	0	1.88679245283019	0	2.83018867924528	0	0	0	1.88679245283019	0	1.88679245283019	0	0	0	0	0	0	0	0	0	9.43396226415094	0	0	0	0	0	0	0	0	0	0	0	0	0.943396226415094	0.943396226415094	0	0	2.83018867924528
2011/02/22	SE	1	d3		0	0	0	0	0	0	0	0	0	1.8348623853211	0	2.75229357798165	0	0.917431192660551	0	1.8348623853211	1.8348623853211	4.58715596330275	0	0	0	0	0	0	0	0	0	0	0	0	0	0	0	0	0	0	0	0	0	2.75229357798165	2.75229357798165	0	0	0	2.75229357798165
2011/02/22	SE	1	d4		0	0	0	0	0	0	0	0	0	0	0	2.97029702970297	0	0	0	0	2.97029702970297	4.95049504950495	0	0	0	0	0	0	0	0	0	0	1.98019801980198	0	0	0	0	0	0	0	0	0	0	4.95049504950495	2.97029702970297	0	0	0	0
2011/02/22	SW	1	d1		0	0	2.80373831775701	0	0	0	0	0	0	0	0	0	0	0	0	0	2.80373831775701	0	0	0	0	0	0	0	0	0	0	0	0	0	0	0	0	0	0	0	0	0	0	0	2.80373831775701	0	0	0	0
2011/02/22	SW	1	d2		0	0	2.77777777777778	0	0	0	0	0	0	0	0	2.77777777777778	0	0	0	0	2.77777777777778	0	0	0	0	0	0	0	0	0	0	0	0	0	0	0	0	0	0	0	0	0	0	0	0	0	0	0	1.85185185185185
2011/02/22	SW	1	d3		0	0	2.9126213592233	0	0	0	0	0	0	0	0	2.9126213592233	0	0.970873786407767	0	0	2.9126213592233	0	0	0	0	0	0	0	0	0	0	0	0	0	0	0	0	0	0	0	0	0	0	0	0.970873786407767	0	0	0	0.970873786407767
2011/02/22	SW	1	d4		0	0	4.67289719626168	0	0	0	0	0	0	0	0	9.34579439252336	0	0	0	0	1.86915887850467	0	0	0	0	0	0	0	0	0	0	0	0	0	0	0	0	0	0	0	0	0	0	0	0	0.934579439252336	0	0	0
2011/02/23	NN1-7	4	d1		0	0	0	0	0	0	0	0	0	4.31034482758621	0	0	0	0	2.58620689655172	0	0	0	0	0	0	0	0	0	0	0	0	0	0	0	0	0	0	0	0	0	0	0	0	4.31034482758621	2.58620689655172	0	0	0	2.58620689655172
2011/02/23	NN1-7	4	d2		0	0	0	0	0	0	0	0	0	4.31034482758621	0	0	0	0	2.58620689655172	0	0	0	0	0	0	0	0	0	0	0	0	0	0	0	0	0	0	0	0	0	0	0	0	8.62068965517241	1.72413793103448	0	0	0	2.58620689655172
2011/02/23	NN1-7	4	d3		0	0	0	0	0	0	0	0	0	4.42477876106195	0	0	0	0	2.65486725663717	0	0	0	0	0	0	0	0	0	0	0	0	0	0	0	0	0	0	0	0	0	0	0	0	4.42477876106195	2.65486725663717	0	0	0	4.42477876106195
2011/02/23	NN1-7	4	d4		0	0	0	0	0	0	0	0	0	4.76190476190476	0	0	0	0	2.85714285714286	0	0	0	0	0	0	0	0	0	0	0	0	0	0	0	0	0	0	0	0	0	0	0	0	9.52380952380952	0	0	0	0	4.76190476190476
2011/02/23	NN1-7	5	d1		0	0	0	0	0	0	0	0	0	4.62962962962963	0	0	0	0	0	0	0	0	0	0	0	0	0	0	0	0	0	0	0	0	0	0	0	0	0	0	0	0	0	9.25925925925926	1.85185185185185	0	0	0	4.62962962962963
2011/02/23	NN1-7	5	d2		0	0	0	0	0	0	0	0	0	2.88461538461538	0	0	0	0	0	0	0	0	0	0	0	0	0	0	0	0	0	0	0	0	0	0	0	0	0	0	0	0	0	9.61538461538462	0.961538461538462	0	0	0	2.88461538461538
2011/02/23	NN1-7	5	d3		0	0	0	0	0	0	0	0	0	4.62962962962963	0	0	0	0	0	0	0	0	0	0	0	0	0	0	0	0	0	0	0	0	0	0	0	0	0	0	0	0	0	2.77777777777778	0	0	0	0	0
2011/02/23	NN1-7	5	d4		0	0	0	0	0	0	0	0	0	4.46428571428571	0	0	0	0	0	0	0	0	0	0	0	0	0	0	0	0	0	0	0	0	0	0	0	0	0	0	0	0	0	2.67857142857143	1.78571428571429	0	0	0	1.78571428571429
2011/02/23	NN8-14	11	d1		0	0	0	0	0	0	0	0	0	0	0	0	0	0	1.8018018018018	0	0	0	0	0	0	0	0	0	0	0	0	0	0	0	0	0	0	0	0.900900900900901	0	0	0	0	9.00900900900901	0	0	0	0	2.7027027027027
2011/02/23	NN8-14	11	d2		0	0	0	0	0	0	0	0	0	0	0	0	0	0	0	0	1.85185185185185	0	0	0	0	0.925925925925926	0	0	0	0	0	0	0	0	0	0	0	0	1.85185185185185	0	0	0	0	13.8888888888889	0	0	0	0	1.85185185185185
2011/02/23	NN8-14	11	d3		0	0	0	0	0	0	0	0	0	0	0	0	0	0	0	0	0	0	0	0	0	4.54545454545455	0	0	0	0	0	0	0	0	0	0	0	0	0.909090909090909	0	0	0	0	13.6363636363636	0	0.909090909090909	0	0	2.72727272727273
2011/02/23	NN8-14	11	d4		0	0	0	0	0	0	0	0	0	0	0	0	0	0	0	0	0	0	0	0	0	4.20168067226891	0	0	0	0	0	0	0	0	0	0	0	0	0.840336134453782	0	0	0	0	12.6050420168067	0	0	0	0	2.52100840336134
2011/02/23	NN8-14	12	d1		0	0	0	0	0	0	0	0	0	2.63157894736842	0	0	0	0	2.63157894736842	0	0	0	0	0	0	0	0	0	0	0	0	0	0	0	0	0	0	0	1.75438596491228	0	0	0	0	8.7719298245614	0	2.63157894736842	0	0	4.3859649122807
2011/02/23	NN8-14	12	d2		0	0	0	0	0	0	0	0	0	0	0	0	0	0	0	0	1.75438596491228	0	0	0	0	0	0	0	0	0	0	0	0	0	0	0	0	0	1.75438596491228	0	0	0	0	2.63157894736842	0	0	0	0	8.7719298245614
2011/02/23	NN8-14	12	d3		0	0	0	0	0	0	0	0	0	1.92307692307692	0	0	0	0	0	0	0	0	0	0	0	0	0	0	0	0	0	0	0	0	0	0	0	0	2.88461538461538	0	0	0	0	2.88461538461538	2.88461538461538	0	0	0	19.2307692307692
2011/02/23	NN8-14	12	d4		0	0	0	0	0	0	0	0	0	1.81818181818182	0	0	0	0	0	0	0	0	0	0	0	0	0	0	0	0	0	0	0	0	0	0	0	0	2.72727272727273	0	0	0	0	4.54545454545455	0	0	0	0	22.7272727272727
2011/02/24	NN1-7	6	d1		0	0	0	0	0	0	0	0	0	1.73913043478261	0	0	0	0	0	0	0	0	0	0	0	0	0	0	0	0	0	0	0	0	0	0	0	0	0	0	0	0	0	4.34782608695652	2.60869565217391	0	0	0	4.34782608695652
2011/02/24	NN1-7	6	d2		0	0	0	0	0	0	0	0	0	0.925925925925926	0	0.925925925925926	0	0	0	0	0	0	0	0	0	0	0	0	0	0	0	0	0	0	0	0	0	0	0	0	0	0	0	4.62962962962963	2.77777777777778	0	0	0	4.62962962962963
2011/02/24	NN1-7	6	d3		0	0	0	0	0	0	0	0	0	4.54545454545455	0	0	0	0	0	0	0	0	0	0	0	0	0	0	0	0	0	0	0	0	0	0	0	0	0	0	0	0	0	4.54545454545455	0	0	0	0	2.72727272727273
2011/02/24	NN1-7	6	d4		0	0	0	0	0	0	0	0	0	2.60869565217391	0	0	0	0	0	0	0	2.60869565217391	0	0	0	0	0	0	0	0	0	0	0	0	0	0	0	0	0	0	0	0	0	2.60869565217391	2.60869565217391	0	0	0	2.60869565217391
2011/02/24	NN1-7	7	d1		0	0	0	0	0	0	0	0	0	2.77777777777778	0	0	18.5185185185185	0	0	0	0	0	0	0	0	0	0	0	0	0	0	0	0	0	0	0	0	0	0	0	0	0	0	4.62962962962963	1.85185185185185	0	0	0	0
2011/02/24	NN1-7	7	d2		0	0	0	0	0	0	0	0	0	1.70940170940171	0	0	51.2820512820513	0	0	0	0	0	0	0	0	0	0	0	0	0	0	0	0	0	0	0	0	0	0	0	0	0	0	0	0	0	0	0	12.8205128205128
2011/02/24	NN1-7	7	d3		0	0	0	0	0	0	0	0	0	2.83018867924528	0	0	28.3018867924528	0	0	0	0	0	0	0	0	0	0	0	0	0	0	0	0	0	0	0	0	0	0	0	0	0	0	2.83018867924528	0	0	0	0	4.71698113207547
2011/02/24	NN1-7	7	d4		0	0	0	0	0	0	0	0	0	2.9126213592233	0	0	2.9126213592233	0	0	0	0	4.85436893203883	0	0	0	0	0	0	0	0	0	0	0	0	0	0	0	0	0	0	0	0	0	9.70873786407767	0	1.94174757281553	0	0	4.85436893203883
2011/02/24	NN8-14	13	d1		1.72413793103448	0	0	0	0	0	0	0	0	0	0	0	0	0	2.58620689655172	0	0	0	0	0	0	0	0	0	0	0	0	0	0	0	0	0	0	2.58620689655172	2.58620689655172	0	0	0	0	4.31034482758621	1.72413793103448	0	0	0	4.31034482758621
2011/02/24	NN8-14	13	d2		0	0	0	0	0	0	0	0	0	0	0	0	0	0	0	0	3.03030303030303	0	0	0	0	0	0	0	0	0	0	0	0	0	0	0	0	2.02020202020202	3.03030303030303	0	0	0	0	10.1010101010101	0	0	0	0	5.05050505050505
2011/02/24	NN8-14	13	d3		2.63157894736842	0	0	0	0	0	0	0	0	0	0	0	0	0	0	0	0	0	0	0	0	0	0	0	0	0	0	0	0	0	0	0	0	0	2.63157894736842	0	0	0	0	4.3859649122807	2.63157894736842	0	0	0	21.9298245614035
2011/02/24	NN8-14	13	d4		2.9126213592233	0	0	0	0	0	0	0	0	0	0	0	0	0	0	0	0	0	0	0	0	0	0	0	0	0	0	0	0	0	0	0	0	0	4.85436893203883	0	0	0	0	2.9126213592233	1.94174757281553	0	0	0	33.9805825242718
2011/02/24	NN8-14	14	d1		0	0	0	0	0	0	0	0	4.71698113207547	0	0	0	0	0	2.83018867924528	0	0	0	0	0	0	0	0	0	0	0	0	0	0	0	0	0	0	4.71698113207547	4.71698113207547	0	0	0	0	9.43396226415094	2.83018867924528	0	0	0	18.8679245283019
2011/02/24	NN8-14	14	d2		0	0	0	0	0	0	0	0	9.70873786407767	0	0	0	0	0	0	0	2.9126213592233	0	0	0	0	4.85436893203883	0	0	0	0	0	0	0	0	0	0	0	0	0	0	0	0	0	9.70873786407767	2.9126213592233	1.94174757281553	0	0	4.85436893203883
2011/02/24	NN8-14	14	d3		0	0	0	0	0	0	0	0	10	0	0	0	0	0	0	0	0	0	0	0	0	0	0	5	0	0	0	0	0	0	0	0	0	0	5	0	0	0	0	10	0	0	0	0	10
2011/02/24	NN8-14	14	d4		0	0	0	0	0	0	0	0	5.10204081632653	0	0	0	0	0	0	0	0	0	0	0	0	0	0	5.10204081632653	0	0	0	0	0	0	0	0	0	0	5.10204081632653	0	0	0	0	10.2040816326531	0	0	0	0	5.10204081632653
2011/02/25	SW	2	d1		0	0	12.7118644067797	0	0	0	0	0	0	0	0	0	4.23728813559322	1.69491525423729	0	0	2.54237288135593	0	0	0	0	0	0	0	0	0	0	0	0	0	0	0	0	0	0	0	0	0	0	0	0	0	0	0	4.23728813559322
2011/02/25	SW	2	d2		0	0	10.4166666666667	0	0	0	0	0	0	0	0	13.5416666666667	0	0	0	0	3.125	0	0	0	0	0	0	0	0	0	0	0	0	0	0	0	0	0	0	0	0	0	0	0	0	0	0	0	10.4166666666667
2011/02/25	SW	2	d3		0	0	20.4081632653061	0	0	0	0	0	0	0	0	5.10204081632653	0	0	0	0	3.06122448979592	0	0	0	0	0	0	0	0	0	0	0	0	0	0	0	0	0	0	0	0	0	0	0	0	0	0	0	5.10204081632653
2011/02/25	SW	2	d4		0	0	28.5714285714286	0	0	0	0	0	0	0	0	14.2857142857143	0	0	0	0	2.85714285714286	0	0	0	0	0	0	0	0	0	0	0	0	0	0	0	0	0	0	0	0	0	0	0	0	0	0	0	4.76190476190476
2011/02/25	SW	3	d1		0	0	2.85714285714286	0	0	0	0	0	0	0	0	9.52380952380952	0	1.9047619047619	0	0	2.85714285714286	0	0	0	0	0	0	0	0	0	0	0	0	0	0	0	0	0	2.85714285714286	0	0	0	0	0	2.85714285714286	0	0	0	2.85714285714286
2011/02/25	SW	3	d2		0	0	2.08333333333333	0	0	0	0	0	0	0	0	0	0	0	0	0	3.125	0	0	0	0	0	0	0	0	0	0	0	0	0	0	0	0	0	10.4166666666667	0	0	0	0	0	3.125	0	0	0	0
2011/02/25	SW	3	d3		0	0	4.90196078431373	0	0	0	0	0	0	0	0	0	0	2.94117647058824	0	0	1.96078431372549	0	0	0	0	0	0	0	0	0	0	0	0	0	0	0	0	0	14.7058823529412	0	0	0	0	0	4.90196078431373	0	0	0	2.94117647058824
2011/02/25	SW	3	d4		0	0	9.43396226415094	0	0	0	0	0	0	0	0	9.43396226415094	0	4.71698113207547	0	0	2.83018867924528	0	0	0	0	0	0	0	0	0	0	0	0	0	0	0	0	0	2.83018867924528	0	0	0	0	0	4.71698113207547	0	0	0	4.71698113207547
2011/02/25	SE	2	d1		0	0	0	0	0	0	0	0	0	0	0	9.1743119266055	0	0	0	0	0	0	0	0	0	0	0	0	0	0	0	0	0	0	0	0	0	0	9.1743119266055	0	0	0	0	0.917431192660551	4.58715596330275	0	0	0	0
2011/02/25	SE	2	d2		0	4.62962962962963	0	0	0	0	0	0	0	0	0	9.25925925925926	0	0	0	0	0	0	0	0	0	0	0	0	0	0	0	0	0	0	0	0	0	0	4.62962962962963	0	0	0	0	2.77777777777778	2.77777777777778	0	0	0	1.85185185185185
2011/02/25	SE	2	d3		0	0	9.43396226415094	0	0	0	0	0	0	0	0	4.71698113207547	0	0	0	0	0	0	0	0	0	0	0	0	0	0	0	0	0	0	0	0	0	0	4.71698113207547	0	0	0	0	2.83018867924528	0	0	0	0	4.71698113207547
2011/02/25	SE	2	d4		0	0	0	0	0	0	0	0	0	0	0	18.5185185185185	0	0	0	0	0	0	0	0	0	0	0	0	0	0	0	0	0	0	0	0	0	0	0	0	0	0	0	0	4.62962962962963	0	0	0	0
2011/02/25	SE	3	d1		0	0	0	0	0	0	0	0	0	1.85185185185185	0	2.77777777777778	2.77777777777778	0	0	0	0	0	0	0	0	0	0	0	0	0	0	0	0	0	0	0	0	2.77777777777778	2.77777777777778	0	0	0	0	2.77777777777778	0	0	0	0	2.77777777777778
2011/02/25	SE	3	d2		0	2.67857142857143	0	0	0	0	0	0	0	2.67857142857143	0	4.46428571428571	2.67857142857143	0	0	0	0	2.67857142857143	0	0	0	0	0	0	0	0	0	0	0	0	0	0	0	0	4.46428571428571	0	0	0	0	1.78571428571429	0	0	0	0	0
2011/02/25	SE	3	d3		0	0	4.95049504950495	0	0	0	0	0	0	9.9009900990099	0	4.95049504950495	0	0	0	0	0	4.95049504950495	0	0	0	0	0	0	0	0	0	0	0	0	0	0	0	0	9.9009900990099	0	0	0	0	2.97029702970297	0	0	0	0	0
2011/02/25	SE	3	d4		0	0	0	0	0	0	0	0	0	4.76190476190476	0	4.76190476190476	1.9047619047619	0	0	0	0	4.76190476190476	0	0	0	0	0	0	0	0	0	0	0	0	0	0	0	0	0	0	0	0	0	1.9047619047619	2.85714285714286	0	0	0	0
2011/02/25	SW	4	d1		0	0	5.20833333333333	0	0	0	0	0	0	0	0	0	0	0	0	0	0	0	0	0	0	0	0	0	0	0	0	0	0	0	0	0	0	0	5.20833333333333	0	0	0	0	3.125	5.20833333333333	0	0	0	0
2011/02/25	SW	4	d2		0	0	2.72727272727273	0	0	0	0	0	0	0	0	0	0	1.81818181818182	0	0	0	0	0	0	0	0	0	0	0	0	0	0	0	0	0	0	0	0	18.1818181818182	0	0	0	0	4.54545454545455	2.72727272727273	0	0	0	1.81818181818182
2011/02/25	SW	4	d3		0	0	4.62962962962963	0	0	0	0	0	0	0	0	0	0	2.77777777777778	0	0	0	0	0	0	0	0	0	0	0	0	0	0	0	0	0	0	0	0	9.25925925925926	0	0	0	0	2.77777777777778	2.77777777777778	0	0	0	2.77777777777778
2011/02/25	SW	4	d4		0	0	4.62962962962963	0	0	0	0	0	0	0	0	0	0	0	0	0	0	0	0	0	0	0	0	0	0	0	0	0	0	0	0	0	0	1.85185185185185	9.25925925925926	0	0	0	0	0	2.77777777777778	2.77777777777778	0	0	0
2011/02/25	SE	4	d1		0	0	0	0	0	0	0	0	0	9.1743119266055	0	2.75229357798165	2.75229357798165	0	0	0	0	4.58715596330275	0	0	0	0	0	0	0	0	0	0	0	0	0	0	0	0	2.75229357798165	0	0	0	0	4.58715596330275	2.75229357798165	1.8348623853211	0	0	1.8348623853211
2011/02/25	SE	4	d2		0	0	1.75438596491228	0	0	0	0	0	0	0	0	4.3859649122807	0	0	0	0	0	2.63157894736842	0	0	0	0	0	0	0	0	0	0	0	0	0	0	0	0	2.63157894736842	0	0	0	0	2.63157894736842	0	0	0	0	0
2011/02/25	SE	4	d3		0	0	7.75193798449612	0	0	0	0	0	0	0	0	7.75193798449612	2.32558139534884	0	0	0	0	1.55038759689922	0	0	0	0	0	0	0	0	0	0	0	0	0	0	0	0	11.6279069767442	0	0	0	0	3.87596899224806	2.32558139534884	0	0	0	2.32558139534884
2011/02/25	SE	4	d4		0	0	0	0	0	0	0	0	0	1.78571428571429	0	2.67857142857143	8.92857142857143	0	0	0	0	0	0	0	0	0	0	0	0	0	0	0	0	0	0	0	0	0	0	0	0	0	0	2.67857142857143	2.67857142857143	0.892857142857143	0	0	2.67857142857143
2011/03/03	NN1-7	1	d1		0	21.9298245614035	0	0	0	0	0	0	0	4.3859649122807	0	0	0	0	0	0	0	0	0	0	0	0	0	0	0	0	0	0	0	0	0	0	0	0	0	0	0	0	0	4.3859649122807	0	0	0	0	0
2011/03/03	NN1-7	1	d2		0	27.7777777777778	0	0	0	0	0	0	0	9.25925925925926	0	0	0	0	0	0	0	0	0	0	0	0	0	0	0	0	0	0	0	0	0	0	0	0	0	0	0	0	0	2.77777777777778	1.85185185185185	4.62962962962963	0	0	4.62962962962963
2011/03/03	NN1-7	1	d3		0	13.8888888888889	18.5185185185185	0	0	0	0	0	0	9.25925925925926	0	0	0	0	0	0	0	0	0	0	0	0	0	0	0	0	0	0	0	0	0	0	0	0	0	0	0	0	0	4.62962962962963	0	0	0	0	0
2011/03/03	NN1-7	1	d4		0	0	36.3636363636364	0	0	0	0	0	0	4.54545454545455	0	0	0	0	0	0	0	0	0	0	0	0	0	0	0	0	0	0	0	0	0	0	0	0	0	0	0	0	0	9.09090909090909	0	0	0	0	0
2011/03/03	NN8-14	8	d1		0	0	0	0	0	0	0	0	0	9.61538461538462	0	0	1.92307692307692	0	0	0	0	0	0	0	0	9.61538461538462	0	0	0	0	0	0	0	0	0	0	0	0	0	0	0	0	0	0	4.80769230769231	0	0	0	0
2011/03/03	NN8-14	8	d2		0	0	0	0	0	0	0	0	0	2.75229357798165	0	0	2.75229357798165	0	0	0	0	0	0	0	0	2.75229357798165	0	0	0	0	0	0	0	0	0	0	0	0	0	0	0	0	0	4.58715596330275	1.8348623853211	2.75229357798165	0	0	0
2011/03/03	NN8-14	8	d3		0	0	0	0	0	0	0	0	0	2.97029702970297	0	0	2.97029702970297	0	0	0	0	0	0	0	0	0	0	0	0	0	0	0	0	0	0	0	0	0	0	0	0	0	0	9.9009900990099	0	0	0	0	0
2011/03/03	NN8-14	8	d4		0	0	0	0	0	0	0	0	0	1.86915887850467	0	0	0	0	0	0	0	9.34579439252336	0	0	0	0	0	0	0	0	0	0	0	0	0	0	0	0	0	0	0	0	0	9.34579439252336	0	0	0	0	0
2011/03/03	SW	1	d1		0	0	1.88679245283019	0	0	0	0	0	0	1.88679245283019	0	0	0	0	0	0	2.83018867924528	0	0	0	0	0	0	0	0	0	0	0	0	0	0	0	0	0	0	0	0	0	0	0	2.83018867924528	0	0	0	0
2011/03/03	SW	1	d2		0	0	2.9126213592233	0	0	0	0	0	0	2.9126213592233	0	2.9126213592233	0	0	0	0	2.9126213592233	0	0	0	0	0	0	0	0	0	0	0	0	0	0	0	0	0	0	0	0	0	0	0	2.9126213592233	0	0	0	0
2011/03/03	SW	1	d3		0	0	4.54545454545455	0	0	0	0	0	0	0.909090909090909	0	2.72727272727273	0	0	2.72727272727273	0	2.72727272727273	0	0	0	0	0	0	0	0	0	0	0	0	0	0	0	0	0	0	0	0	0	0	0.909090909090909	0.909090909090909	0	0	0	0
2011/03/03	SW	1	d4		0	0	2.83018867924528	0	0	0	0	0	0	0	0	9.43396226415094	0	0	0	0	2.83018867924528	0	0	0	0	0	0	0	0	0	0	0	0	0	0	0	0	0	0	0	0	0	0	0	0	2.83018867924528	0	0	0
2011/03/03	SE	1	d1		0	0	0	0	0	0	0	0	0	0	0	2.72727272727273	0	0	0	0	0	1.81818181818182	0	0	0	0	0	0	0	0	0	0	0	0	0	0	0	0	0	0	0	0	0	2.72727272727273	4.54545454545455	0	0	0	0
2011/03/03	SE	1	d2		0	0	0	0	0	0	0	0	0	0	0	1.88679245283019	0	0	0	1.88679245283019	0	0	0	0	0	0	0	0	0	0	0	9.43396226415094	0	0	0	0	0	0	0	0	0	0	0	0	1.88679245283019	0	0	0	1.88679245283019
2011/03/03	SE	1	d3		0	0	0	0	0	0	0	0	0	0	0	2.65486725663717	0	0	0	2.65486725663717	2.65486725663717	2.65486725663717	0	0	0	0	0	0	0	0	0	0	0	0	0	0	0	0	0	0	0	0	0	2.65486725663717	4.42477876106195	0	0	0	2.65486725663717
2011/03/03	SE	1	d4		0	0	0	0	0	0	0	0	0	1.76991150442478	0	2.65486725663717	0	0	0	0	4.42477876106195	4.42477876106195	0	0	0	0	0	0	0	0	0	0	0	0	0	0	0	0	0	0	0	0	0	2.65486725663717	2.65486725663717	0	0	0	0
2011/03/04	SW	2	d1		0	0	9.52380952380952	0	0	0	0	0	0	0.952380952380952	0	0	0	0.952380952380952	0	0	4.76190476190476	0	0	0	0	0	0	0	0	0	0	0	0	0	0	0	0	0	0	0	0	0	0	0	0	0	0	0	0
2011/03/04	SW	2	d2		0	0	18.018018018018	0	0	0	0	0	0	0.900900900900901	0	11.7117117117117	0	0	0	0	2.7027027027027	0	0	0	0	0	0	0	0	0	0	0	0	0	0	0	0	0	0	0	0	0	0	0	1.8018018018018	0	0	0	0
2011/03/04	SW	2	d3		0	0	9.25925925925926	0	0	0	0	0	0	2.77777777777778	0	4.62962962962963	0	0	0	0	2.77777777777778	0	0	0	0	0	0	0	0	0	0	0	0	0	0	0	0	0	0	0	0	0	0	0	0	0	0	0	0
2011/03/04	SW	2	d4		0	0	18.1818181818182	0	0	0	0	0	0	1.81818181818182	0	13.6363636363636	0	0	0	0	2.72727272727273	0	0	0	0	0	0	0	0	0	0	0	0	0	0	0	0	0	0	0	0	0	0	0	0	0	0	0	0
2011/03/04	SE	2	d1		0	0	0	0	0	0	0	0	0	1.86915887850467	0	9.34579439252336	0	0	0	0	0	0.934579439252336	0	0	0	0	0	0	0	0	0	0	0	0	0	0	0	0	9.34579439252336	0	0	0	0	0	2.80373831775701	0	0	0	0
2011/03/04	SE	2	d2		0	4.76190476190476	0	0	0	0	0	0	0	0.952380952380952	0	19.047619047619	0	0	0	0	0	0	0	0	0	0	0	0	0	0	0	0	0	0	0	0	0	0	4.76190476190476	0	0	0	0	0	2.85714285714286	0	0	0	2.85714285714286
2011/03/04	SE	2	d3		0	0	9.1743119266055	0	0	0	0	0	0	0.917431192660551	0	13.7614678899083	0	0	0	0	0	0	0	0	0	0	0	0	0	0	0	0	0	0	0	0	0	0	4.58715596330275	0	0	0	0	2.75229357798165	0	0	0	0	4.58715596330275
2011/03/04	SE	2	d4		0	0	0	0	0	0	0	0	0	2.77777777777778	0	18.5185185185185	0	0	0	0	0	0	0	0	0	0	0	0	0	0	0	0	0	0	0	0	0	0.925925925925926	0	0	0	0	0	0.925925925925926	4.62962962962963	0	0	0	0
2011/03/08	NN1-7	2	d1		0	13.7614678899083	0	0	0	0	0	0	0	4.58715596330275	0	0	0	0	0	0	0	0	0	0	0	0	0	0	0	0	0	0	0	0	0	0	0	0	0	0	0	0	0	1.8348623853211	4.58715596330275	0	0	0	0
2011/03/08	NN1-7	2	d2		0	18.5185185185185	0	0	0	0	0	0	0	4.62962962962963	0	0	0	0	0	0	0	0	0	0	0	0	0	0	0	0	0	0	0	0	0	0	0	0	0	0	0	0	0	0	2.77777777777778	0	0	0	1.85185185185185
2011/03/08	NN1-7	2	d3		0	9.61538461538462	19.2307692307692	0	0	0	0	0	0	4.80769230769231	0	0	0	0	0	0	0	0	0	0	0	0	0	0	0	0	0	0	0	0	0	0	0	0	0	0	0	0	0	4.80769230769231	4.80769230769231	0	0	0	0
2011/03/08	NN1-7	2	d4		0	0	38.8349514563107	0	0	0	0	0	0	4.85436893203883	0	0	0	0	0	0	0	0	0	0	0	0	0	0	0	0	0	0	0	0	0	0	0	0	0	0	0	0	0	4.85436893203883	0	0	0	0	0
2011/03/08	NN8-14	9	d1		0	0	0	0	0	0	0	0	0	2.94117647058824	0	0	0	0	0	0	0	0	0	0	0	0	0	0	0	0	0	0	0	0	0	0	0	0	1.96078431372549	0	0	0	0	9.80392156862745	2.94117647058824	0	0	0	0
2011/03/08	NN8-14	9	d2		0	0	0	0	0	0	0	0	0	2.7027027027027	0	0	0	0	0	0	0	0	0	0	0	0	0	0	0	0	0	0	0	0	0	0	0	0	2.7027027027027	0	0	0	0	4.5045045045045	2.7027027027027	0	0	0	2.7027027027027
2011/03/08	NN8-14	9	d3		0	0	0	0	0	0	0	0	0	4.95049504950495	0	0	0	0	0	0	0	0	0	0	0	0	0	0	0	0	0	0	0	0	0	0	0	0	2.97029702970297	0	0	0	0	4.95049504950495	0	0	0	0	0
2011/03/08	NN8-14	9	d4		0	0	0	0	0	0	0	0	0	4.90196078431373	0	0	0	0	0	0	0	0	0	0	0	0	0	0	0	0	0	0	0	0	0	0	0	0	0.980392156862745	0	0	0	0	4.90196078431373	2.94117647058824	0	0	0	0
2011/03/10	NN1-7	3	d1		0	13.5135135135135	0	0	0	0	0	0	0	4.5045045045045	0	0	0	0	0	0	0	0	0	0	0	0	0	0	0	0	0	0	0	0	0	0	0	0	0	0	0	0	0	2.7027027027027	1.8018018018018	0	0	0	0
2011/03/10	NN1-7	3	d2		0	19.8019801980198	0	0	0	0	0	0	0	4.95049504950495	0	0	0	0	0	0	0	0	0	0	0	0	0	0	0	0	0	0	0	0	0	0	0	0	0	0	0	0	0	4.95049504950495	2.97029702970297	0	0	0	2.97029702970297
2011/03/10	NN1-7	3	d3		0	9.00900900900901	22.5225225225225	0	0	0	0	0	0	2.7027027027027	0	0	0	0	0	0	0	0	0	0	0	0	0	0	0	0	0	0	0	0	0	0	0	0	0	0	0	0	0	4.5045045045045	0	0	0	0	0
2011/03/10	NN1-7	3	d4		0	0	32.1100917431193	0	0	0	0	0	0	2.75229357798165	0	0	0	0	0	0	0	0	0	0	0	0	0	0	0	0	0	0	0	0	0	0	0	0	0	0	0	0	0	9.1743119266055	2.75229357798165	0	0	0	2.75229357798165
2011/03/10	NN1-7	4	d1		0	0	0	0	0	0	0	0	0	4.95049504950495	0	0	0	0	4.95049504950495	0	0	0	0	0	0	0	0	0	0	0	0	0	0	0	0	0	0	0	0	0	0	0	0	4.95049504950495	2.97029702970297	0	0	0	0
2011/03/10	NN1-7	4	d2		0	0	0	0	0	0	0	0	0	4.95049504950495	0	0	0	0	9.9009900990099	0	0	0	0	0	0	0	0	0	0	0	0	0	0	0	0	0	0	0	0	0	0	0	0	0.99009900990099	1.98019801980198	0	0	0	0
2011/03/10	NN1-7	4	d3		0	0	0	0	0	0	0	0	0	9.25925925925926	0	0	0	0	9.25925925925926	0	0	0	0	0	0	0	0	0	0	0	0	0	0	0	0	0	0	0	0	0	0	0	0	4.62962962962963	2.77777777777778	0	0	0	0
2011/03/10	NN1-7	4	d4		0	0	0	0	0	0	0	0	0	5	0	0	0	0	5	0	0	0	0	0	0	0	0	0	0	0	0	0	0	0	0	0	0	0	0	0	0	0	0	5	0	0	0	0	0
2011/03/10	NN8-14	10	d1		0	0	0	0	0	0	0	0	0	0.934579439252336	0	0	0	0	9.34579439252336	0	0	0	0	0	0	0	0	0	0	0	0	0	0	0	0	0	0	0	0	0	0	0	0	4.67289719626168	2.80373831775701	0	0	0	0
2011/03/10	NN8-14	10	d2		0	0	0	0	0	0	0	0	0	0.884955752212389	0	0	0	0	0	0	0	0	0	0	0	0	0	0	0	0	0	0	0	0	0	0	0	0	0.884955752212389	0	0	0	0	0	2.65486725663717	0	0	0	0
2011/03/10	NN8-14	10	d3		0	0	0	0	0	0	0	0	0	1.96078431372549	0	0	0	0	0	0	0	0	0	0	0	0	0	0	0	0	0	0	0	0	0	0	0	0	0.980392156862745	0	0	0	0	4.90196078431373	1.96078431372549	0	0	0	0
2011/03/10	NN8-14	10	d4		0	0	0	0	0	0	0	0	0	3.03030303030303	0	0	0	0	0	0	0	0	0	0	0	0	0	0	0	0	0	0	0	0	0	0	0	0	0	0	0	0	0	5.05050505050505	3.03030303030303	0	0	0	0
2011/03/10	NN8-14	11	d1		0	0	0	0	0	0	0	0	0	1.02040816326531	0	0	0	0	5.10204081632653	0	0	0	0	0	0	0	0	0	0	0	0	0	0	0	0	0	0	0	1.02040816326531	0	0	0	0	3.06122448979592	2.04081632653061	0	0	0	0
2011/03/10	NN8-14	11	d2		0	0	0	0	0	0	0	0	0	1.98019801980198	0	0	0	0	0	0	2.97029702970297	0	0	0	0	0	0	0	0	0	0	0	0	0	0	0	0	0	2.97029702970297	0	0	0	0	4.95049504950495	0	0	0	0	0
2011/03/10	NN8-14	11	d3		0	0	0	0	0	0	0	0	0	0	0	0	0	0	0	0	0	0	0	0	0	4.85436893203883	0	0	0	0	0	0	0	0	0	0	0	0	0.970873786407767	0	0	0	0	9.70873786407767	0	0	0	0	0
2011/03/10	NN8-14	11	d4		0	0	0	0	0	0	0	0	0	1.88679245283019	0	0	0	0	0	0	0	0	0	0	0	4.71698113207547	0	0	0	0	0	0	0	0	0	0	0	0	0.943396226415094	0	0	0	0	14.1509433962264	2.83018867924528	0	0	0	0
2011/03/10	NN1-7	5	d1		0	0	0	0	0	0	0	0	0	4.85436893203883	0	0	0	0	0	0	0	0	0	0	0	0	0	0	0	0	0	0	0	0	0	0	0	0	0	0	0	0	0	4.85436893203883	2.9126213592233	0	0	0	0
2011/03/10	NN1-7	5	d2		0	0	0	0	0	0	0	0	0	2.80373831775701	0	0	0	0	0	0	0	0	0	0	0	0	0	0	0	0	0	0	0	0	0	0	0	0	0	0	0	0	0	2.80373831775701	0	0	0	0	2.80373831775701
2011/03/10	NN1-7	5	d3		0	0	0	0	0	0	0	0	0	0.943396226415094	0	0	0	0	0	0	0	4.71698113207547	0	0	0	0	0	0	0	0	0	0	0	0	0	0	0	0	0	0	0	0	0	4.71698113207547	1.88679245283019	0	0	0	0
2011/03/10	NN1-7	5	d4		0	0	0	0	0	0	0	0	0	2.88461538461538	0	0	0	0	0	0	0	2.88461538461538	0	0	0	0	0	0	0	0	0	0	0	0	0	0	0	0	0	0	0	0	0	2.88461538461538	1.92307692307692	0	0	0	0
2011/03/11	NN8-14	7	d1		0	0	0	0	0	0	0	0	0	1.92307692307692	0	0	19.2307692307692	0	0	0	0	0	0	0	0	0	0	0	0	0	0	0	0	0	0	0	0	0	0	0	0	0	0	2.88461538461538	1.92307692307692	0	0	0	0
2011/03/11	NN8-14	7	d2		0	0	0	0	0	0	0	0	0	4.80769230769231	0	0	38.4615384615385	0	0	0	0	0	0	0	0	0	0	0	0	0	0	0	0	0	0	0	0	0	0	0	0	0	0	0.961538461538462	0	0	0	0	0
2011/03/11	NN8-14	7	d3		0	0	0	0	0	0	0	0	0	2.9126213592233	0	0	33.9805825242718	0	0	0	0	0	0	0	0	0	0	0	0	0	0	0	0	0	0	0	0	0	0	0	0	0	0	1.94174757281553	0	0	0	0	0
2011/03/11	NN8-14	7	d4		0	0	0	0	0	0	0	0	0	4.76190476190476	0	0	4.76190476190476	0	0	0	0	9.52380952380952	0	0	0	0	0	0	0	0	0	0	0	0	0	0	0	0	0	0	0	0	0	14.2857142857143	0	1.9047619047619	0	0	0
2011/03/11	NN8-14	12	d1		0	0	0	0	0	0	0	0	0	0.980392156862745	0	0	0	0	4.90196078431373	0	0	0	0	0	0	0	0	0	0	0	0	0	0	0	0	0	0	0	0.980392156862745	0	0	0	0	19.6078431372549	0	1.96078431372549	0	0	0
2011/03/11	NN8-14	12	d2		0	0	0	0	0	0	0	0	0	0	0	0	0	0	0	0	0.961538461538462	0	0	0	0	0	0	0	0	0	0	0	0	0	0	0	0	0	0.961538461538462	0	0	0	0	0	0	0	0	0	0
2011/03/11	NN8-14	12	d3		0	0	0	0	0	0	0	0	0	2.83018867924528	0	0	0	0	0	0	0	0	0	0	0	0	0	0	0	0	0	0	0	0	0	0	0	0	2.83018867924528	0	0	0	0	2.83018867924528	2.83018867924528	0	0	0	0
2011/03/11	NN8-14	12	d4		0	0	0	0	0	0	0	0	0	2.65486725663717	0	0	0	0	0	0	0	0	0	0	0	0	0	0	0	0	0	0	0	0	0	0	0	0	1.76991150442478	0	0	0	0	4.42477876106195	1.76991150442478	0	0	0	0
2011/03/12	NN8-14	13	d1		2.9126213592233	0	0	0	0	0	0	0	2.9126213592233	2.9126213592233	0	0	0	0	2.9126213592233	0	0	0	0	0	0	0	0	0	0	0	0	0	0	0	0	0	0	0	2.9126213592233	0	0	0	0	2.9126213592233	0	0.970873786407767	0	0	0
2011/03/12	NN8-14	13	d2		2.83018867924528	0	0	0	0	0	0	0	0	2.83018867924528	0	0	0	0	0	0	2.83018867924528	0	0	0	0	0	0	0	0	0	0	0	0	0	0	0	0	0	0	0	0	0	0	4.71698113207547	2.83018867924528	0	0	0	0
2011/03/12	NN8-14	13	d3		2.83018867924528	0	0	0	0	0	0	0	1.88679245283019	0	0	0	0	0	0	0	0	0	0	0	0	0	0	1.88679245283019	0	0	0	0	0	0	0	0	0	0	2.83018867924528	0	0	0	0	2.83018867924528	0	0	0	0	0
2011/03/12	NN8-14	13	d4		2.56410256410256	0	0	0	0	0	0	0	0	2.56410256410256	0	0	0	0	0	0	0	0	0	0	0	0	0	0	0	0	0	0	0	0	0	0	0	0	4.27350427350427	0	0	0	0	2.56410256410256	1.70940170940171	0	0	0	0
2011/03/12	NN8-14	14	d1		0	0	0	0	0	0	0	0	13.3928571428571	2.67857142857143	0	0	0	0	2.67857142857143	0	0	0	0	0	0	0	0	0	0	0	0	0	0	0	0	0	0	0	2.67857142857143	0	0	0	0	4.46428571428571	2.67857142857143	0	0	0	0
2011/03/12	NN8-14	14	d2		2.94117647058824	0	0	0	0	0	0	0	4.90196078431373	0	0	0	0	0	0	0	2.94117647058824	0	0	0	0	0	0	2.94117647058824	0	0	0	0	0	0	0	0	0	0	0	0	0	0	0	4.90196078431373	0	0	0	0	0
2011/03/12	NN8-14	14	d3		0	0	0	0	0	0	0	0	9.9009900990099	0	0	0	0	0	0	0	0	0	0	0	0	0	0	2.97029702970297	0	0	0	0	0	0	0	0	0	0	4.95049504950495	0	0	0	0	14.8514851485149	0	0	0	0	0
2011/03/12	NN8-14	14	d4		0	0	0	0	0	0	0	0	4.95049504950495	0	0	0	0	0	0	0	0	0	0	0	0	0	0	2.97029702970297	0	0	0	0	0	0	0	0	0	0	4.95049504950495	0	0	0	0	4.95049504950495	0	0	0	0	0
2011/03/12	SW	3	d1		0	0	2.67857142857143	0	0	0	0	0	0	0	0	8.92857142857143	0	1.78571428571429	0	0	1.78571428571429	0	0	0	0	0	0	0	0	0	0	0	0	0	0	0	0	0	2.67857142857143	0	0	0	0	0	0.892857142857143	0	0	0	0
2011/03/12	SW	3	d2		0	0	0	0	0	0	0	0	0	0	0	4.95049504950495	0	0	0	0	1.98019801980198	0	0	0	0	0	0	0	0	0	0	0	0	0	0	0	0	0	4.95049504950495	0	0	0	0	0	2.97029702970297	0	0	0	0
2011/03/12	SW	3	d3		0	0	4.90196078431373	0	0	0	0	0	0	0	0	0	0	1.96078431372549	0	0	0	0	0	0	0	0	0	0	0	0	0	0	0	0	0	0	0	0	4.90196078431373	0	0	0	0	0	2.94117647058824	0	0	0	0
2011/03/12	SW	3	d4		0	0	4.80769230769231	0	0	0	0	0	0	0	0	9.61538461538462	0	2.88461538461538	0	0	2.88461538461538	0	0	0	0	0	0	0	0	0	0	0	0	0	0	0	0	0	2.88461538461538	0	0	0	0	0	4.80769230769231	0	0	0	0
2011/03/12	SE	3	d1		0	0	0	0	0	0	0	0	0	2.85714285714286	0	2.85714285714286	2.85714285714286	0	0	0	0	1.9047619047619	0	0	0	0	0	0	0	0	0	0	0	0	0	0	0	1.9047619047619	2.85714285714286	0	0	0	0	2.85714285714286	0	0	0	0	0
2011/03/12	SE	3	d2		0	2.83018867924528	0	0	0	0	0	0	0	2.83018867924528	0	2.83018867924528	2.83018867924528	0	0	0	0	2.83018867924528	0	0	0	0	0	0	0	0	0	0	0	0	0	0	0	0	4.71698113207547	0	0	0	0	2.83018867924528	2.83018867924528	0	0	0	0
2011/03/12	SE	3	d3		0	0	0	0	0	0	0	0	0	4.80769230769231	0	4.80769230769231	2.88461538461538	0	0	0	0	2.88461538461538	0	0	0	0	0	0	0	0	0	0	0	0	0	0	0	0	14.4230769230769	0	0	0	0	0	0	0	0	0	0
2011/03/12	SE	3	d4		0	0	0	0	0	0	0	0	0	4.54545454545455	0	4.54545454545455	0	0	0	0	0	2.72727272727273	0	0	0	0	0	0	0	0	0	0	0	0	0	0	0	0	0	0	0	0	0	0	2.72727272727273	0	0	0	0
2011/03/12	SW	4	d1		0	0	2.65486725663717	0	0	0	0	0	0	2.65486725663717	0	0	0	0	0	0	0	0	0	0	0	0	0	0	0	0	0	0	0	0	0	0	0	0	4.42477876106195	0	0	0	0	2.65486725663717	2.65486725663717	0	0	0	0
2011/03/12	SW	4	d2		0	0	4.3859649122807	0	0	0	0	0	0	0	0	0	0	0	0	0	0	0	0	0	0	0	0	0	0	0	0	0	0	0	0	0	0	0	8.7719298245614	0	0	0	0	0	2.63157894736842	0	0	0	0
2011/03/12	SW	4	d3		0	0	4.62962962962963	0	0	0	0	0	0	0	0	0	0	0.925925925925926	0	0	0	0	0	0	0	0	0	0	0	0	0	0	0	0	0	0	0	0	4.62962962962963	0	0	0	0	0	2.77777777777778	0	0	0	0
2011/03/12	SW	4	d4		0	0	4.95049504950495	0	0	0	0	0	0	0	0	0	0	0	0	0	0	0	0	0	0	0	0	0	0	0	0	0	0	0	0	0	0	0	4.95049504950495	0	0	0	0	2.97029702970297	0	0	0	0	0
2011/03/12	SE	4	d1		0	0	0	0	0	0	0	0	0	4.62962962962963	0	2.77777777777778	0.925925925925926	0	0	0	0	4.62962962962963	0	0	0	0	0	0	0	0	0	0	0	0	0	0	0	0	2.77777777777778	0	0	0	0	4.62962962962963	2.77777777777778	0	0	0	0
2011/03/12	SE	4	d2		0	0	0	0	0	0	0	0	0	2.77777777777778	0	4.62962962962963	0	0	0	0	0	2.77777777777778	0	0	0	0	0	0	0	0	0	0	0	0	0	0	0	0	2.77777777777778	0	0	0	0	2.77777777777778	0	0	0	0	0
2011/03/12	SE	4	d3		0	0	9.61538461538462	0	0	0	0	0	0	0	0	9.61538461538462	2.88461538461538	0	0	0	0	0	0	0	0	0	0	0	0	0	0	0	0	0	0	0	0	0	9.61538461538462	0	0	0	0	2.88461538461538	2.88461538461538	0	0	0	0
2011/03/12	SE	4	d4		0	0	0	0	0	0	0	0	0	0	0	3.7037037037037	9.25925925925926	0	0	0	0	0	0	0	0	0	0	0	0	0	0	0	0	0	0	0	0	0	0	0	0	0	0	2.77777777777778	4.62962962962963	0	0	0	0
2011/03/23	NN1-7	1	d1		0	29.126213592233	0	0	0	0	0	0	0	4.85436893203883	0	0	0	0	0	0	0	0	0	0	0	0	0	0	0	0	0	0	0	0	0	0	0	0	0	0	0	0	0	4.85436893203883	0	0	0	4.85436893203883	0
2011/03/23	NN1-7	1	d2		0	28.8461538461538	0	0	0	0	0	0	0	9.61538461538462	0	0	0	0	0	0	0	0	0	0	0	0	0	0	0	0	0	0	0	0	0	0	0	0	0	0	0	0	0	4.80769230769231	0	4.80769230769231	0	0	9.61538461538462
2011/03/23	NN1-7	1	d3		0	14.2857142857143	28.5714285714286	0	0	0	0	0	0	9.52380952380952	0	0	0	0	0	0	0	0	0	0	0	0	0	0	0	0	0	0	0	0	0	0	0	0	0	0	0	0	0	4.76190476190476	0	0	0	0	0
2011/03/23	NN1-7	1	d4		0	0	40	0	0	0	0	0	0	10	0	0	0	0	0	0	0	0	0	0	0	0	0	0	0	0	0	0	0	0	0	0	0	0	0	0	0	0	0	10	5	0	0	0	0
2011/03/23	NN1-7	2	d1		0	9.43396226415094	0	0	0	0	0	0	0	4.71698113207547	0	0	0	0	0	0	0	0	0	0	0	0	0	0	0	0	0	0	0	0	0	0	0	0	0	0	0	0	0	4.71698113207547	4.71698113207547	0	0	0	2.83018867924528
2011/03/23	NN1-7	2	d2		0	20	0	0	0	0	0	0	0	5	0	0	0	0	0	0	0	0	0	0	0	0	0	0	0	0	0	0	0	0	0	0	0	0	0	0	0	0	0	0	5	0	0	0	5
2011/03/23	NN1-7	2	d3		0	14.2857142857143	28.5714285714286	0	0	0	0	0	0	4.76190476190476	0	0	0	0	0	0	0	0	0	0	0	0	0	0	0	0	0	0	0	0	0	0	0	0	0	0	0	0	0	4.76190476190476	4.76190476190476	0	0	0	4.76190476190476
2011/03/23	NN1-7	2	d4		0	0	38.8349514563107	0	0	0	0	0	0	4.85436893203883	0	0	0	0	0	0	0	0	0	0	0	0	0	0	0	0	0	0	0	0	0	0	0	0	0	0	0	0	0	4.85436893203883	2.9126213592233	0	0	0	0
2011/03/23	NN1-7	3	d1		0	18.8679245283019	0	0	0	0	0	0	0	4.71698113207547	0	0	0	0	0	0	0	0	0	0	0	0	0	0	0	0	0	0	0	0	0	0	0	0	0	0	0	0	0	2.83018867924528	0	0	0	0	0
2011/03/23	NN1-7	3	d2		0	21.1864406779661	0	0	0	0	0	0	0	2.54237288135593	0	0	0	0	0	0	0	0	0	0	0	0	0	0	0	0	0	0	0	0	0	0	0	0	0	0	0	0	0	2.54237288135593	2.54237288135593	0	0	0	2.54237288135593
2011/03/23	NN1-7	3	d3		0	13.7614678899083	27.5229357798165	0	0	0	0	0	0	1.8348623853211	0	0	0	0	0	0	0	0	0	0	0	0	0	0	0	0	0	0	0	0	0	0	0	0	0	0	0	0	0	4.58715596330275	1.8348623853211	0	0	0	0
2011/03/23	NN1-7	3	d4		0	0	39.2156862745098	0	0	0	0	0	0	1.96078431372549	0	0	0	0	0	0	0	0	0	0	0	0	0	0	0	0	0	0	0	0	0	0	0	0	0	0	0	0	0	9.80392156862745	4.90196078431373	0	0	0	4.90196078431373
2011/03/23	NN1-7	4	d1		0	0	0	0	0	0	0	0	0	3.06122448979592	0	0	0	0	5.10204081632653	0	0	0	0	0	0	0	0	0	0	0	0	0	0	0	0	0	0	0	0	0	0	0	0	5.10204081632653	5.10204081632653	0	0	0	0
2011/03/23	NN1-7	4	d2		0	0	0	0	0	0	0	0	0	4.76190476190476	0	0	0	0	9.52380952380952	0	0	0	0	0	0	0	0	0	0	0	0	0	0	0	0	0	0	0	0	0	0	0	0	4.76190476190476	0	0	0	0	0
2011/03/23	NN1-7	4	d3		0	0	0	0	0	0	0	0	0	9.1743119266055	0	0	0	0	9.1743119266055	0	0	0	0	0	0	0	0	0	0	0	0	0	0	0	0	0	0	0	0	0	0	0	0	0	2.75229357798165	0	0	0	2.75229357798165
2011/03/23	NN1-7	4	d4		0	0	0	0	0	0	0	0	0	5	0	0	0	0	5	0	0	0	0	0	0	0	0	0	0	0	0	0	0	0	0	0	0	0	0	0	0	0	0	5	0	0	0	0	0
2011/03/24	NN1-7	5	d1		0	0	0	0	0	0	0	0	0	9.70873786407767	0	0	0	0	0	0	0	0	0	0	0	0	0	0	0	0	0	0	0	0	0	0	0	0	0	0	0	0	0	4.85436893203883	2.9126213592233	0	0	0	0
2011/03/24	NN1-7	5	d2		0	0	0	0	0	0	0	0	0	2.88461538461538	0	0	0	0	0	0	0	0	0	0	0	0	0	0	0	0	0	0	0	0	0	0	0	0	0	0	0	0	0	4.80769230769231	2.88461538461538	0	0	0	4.80769230769231
2011/03/24	NN1-7	5	d3		0	0	0	0	0	0	0	0	0	2	0	0	0	0	0	0	0	5	0	0	0	0	0	0	0	0	0	0	0	0	0	0	0	0	0	0	0	0	0	3	0	0	0	0	0
2011/03/24	NN1-7	5	d4		0	0	0	0	0	0	0	0	0	4.95049504950495	0	0	0	0	0	0	0	2.97029702970297	0	0	0	0	0	0	0	0	0	0	0	0	0	0	0	0	0	0	0	0	0	4.95049504950495	0	0	0	0	0
2011/03/24	NN1-7	6	d1		0	0	0	0	0	0	0	0	0	2.75229357798165	0	0	0	0	0	0	0	0	0	0	0	0	0	0	0	0	0	0	0	0	0	0	0	0	0	0	0	0	0	4.58715596330275	2.75229357798165	0	0	0	0
2011/03/24	NN1-7	6	d2		0	0	0	0	0	0	0	0	0	1.96078431372549	0	0	0	0	0	0	0	0	0	0	0	0	0	0	0	0	0	0	0	0	0	0	0	0	0	0	0	0	0	2.94117647058824	2.94117647058824	0	0	0	2.94117647058824
2011/03/24	NN1-7	6	d3		0	0	0	0	0	0	0	0	0	4.58715596330275	0	0	0	0	0	0	0	0	0	0	0	0	0	0	0	0	0	0	0	0	0	0	0	0	0	0	0	0	0	2.75229357798165	2.75229357798165	0	0	0	0
2011/03/24	NN1-7	6	d4		0	0	0	0	0	0	0	0	0	4.71698113207547	0	0	0	0	0	0	0	0	0	0	0	0	0	0	0	0	0	0	0	0	0	0	0	0	0	0	0	0	0	9.43396226415094	2.83018867924528	0	0.943396226415094	0	0
2011/03/24	NN1-7	7	d1		0	0	0	0	0	0	0	0	0	2.72727272727273	0	0	27.2727272727273	0	0	0	0	0	0	0	0	0	0	0	0	0	0	0	0	0	0	0	0	0	0	0	0	0	0	4.54545454545455	2.72727272727273	0	0	0	0
2011/03/24	NN1-7	7	d2		0	0	0	0	0	0	0	0	0	2.77777777777778	0	0	41.6666666666667	0	0	0	0	0	0	0	0	0	0	0	0	0	0	0	0	0	0	0	0	0	0	0	0	0	0	4.62962962962963	0	0	0	0	0
2011/03/24	NN1-7	7	d3		0	0	0	0	0	0	0	0	0	4.62962962962963	0	0	41.6666666666667	0	0	0	0	0	0	0	0	0	0	0	0	0	0	0	0	0	0	0	0	0	0	0	0	0	0	2.77777777777778	0	0	0	0	0
2011/03/24	NN1-7	7	d4		0	0	0	0	0	0	0	0	0	4.85436893203883	0	2.9126213592233	0	0	0	0	0	4.85436893203883	0	0	0	0	0	0	0	0	0	0	0	0	0	0	0	0	0	0	0	0	0	9.70873786407767	0	0	0	0	0
2011/03/24	NN8-14	8	d1		0	0	0	0	0	0	0	0	0	0	0	0	3.2258064516129	0	0	0	0	0	0	0	0	10.752688172043	0	0	0	0	0	0	0	0	0	0	0	0	0	0	0	0	0	0	5.37634408602151	0	0	0	0
2011/03/24	NN8-14	8	d2		0	0	0	0	0	0	0	0	0	0	0	0	3.06122448979592	0	0	0	0	0	0	0	0	0	0	0	0	0	0	0	0	0	0	0	0	0	0	0	0	0	0	5.10204081632653	0	5.10204081632653	0	0	0
2011/03/24	NN8-14	8	d3		0	0	0	0	0	0	0	0	0	2.94117647058824	0	0	2.94117647058824	0	0	0	0	2.94117647058824	0	0	0	0	0	0	0	0	0	0	0	0	0	0	0	0	0	0	0	0	0	9.80392156862745	0	0	2.94117647058824	0	0
2011/03/24	NN8-14	8	d4		0	0	0	0	0	0	0	0	0	0	0	0	0	0	0	0	0	4.71698113207547	0	0	0	0	0	0	0	0	0	0	0	0	0	0	0	0	0	0	0	0	0	9.43396226415094	0	2.83018867924528	2.83018867924528	0	0
2011/03/26	NN8-14	9	d1		0	0	0	0	0	0	0	0	0	2.67857142857143	0	0	0	0	0	0	0	0	0	0	0	0	0	0	0	0	0	0	0	0	0	0	0	0	2.67857142857143	0	0	0	0	4.46428571428571	2.67857142857143	0	0	0	0
2011/03/26	NN8-14	9	d2		0	0	0	0	0	0	0	0	0	2.75229357798165	0	0	0	0	0	0	0	0	0	0	0	0	0	0	0	0	0	0	0	0	0	0	0	0	4.58715596330275	0	0	0	0	4.58715596330275	2.75229357798165	0	0	0	2.75229357798165
2011/03/26	NN8-14	9	d3		0	0	0	0	0	0	0	0	0	2.77777777777778	0	0	0	0	0	0	0	0	0	0	0	0	0	0	0	0	0	0	0	0	0	0	0	0	0	0	0	0	0	4.62962962962963	0	0	0	0	0
2011/03/26	NN8-14	9	d4		0	0	0	0	0	0	0	0	0	4.31034482758621	0	0	0	0	0	0	0	0	0	0	0	0	0	0	0	0	0	0	0	0	0	0	0	0	2.58620689655172	0	0	0	0	8.62068965517241	0	0	2.58620689655172	0	0
2011/03/26	NN8-14	10	d1		0	0	0	0	0	0	0	0	0	2.67857142857143	0	0	0	0	4.46428571428571	0	0	0	0	0	0	0	0	0	0	0	0	0	0	0	0	0	0	0	0.892857142857143	0	0	0	0	4.46428571428571	4.46428571428571	0	0	0	0
2011/03/26	NN8-14	10	d2		0	0	0	0	0	0	0	0	0	0	0	0	0	0	0	0	0	0	0	0	0	0	0	0	0	0	0	0	0	0	0	0	0	0	0.961538461538462	0	0	0	0	0	1.92307692307692	0	0	0	0
2011/03/26	NN8-14	10	d3		0	0	0	0	0	0	0	0	0	1.8018018018018	0	0	0	0	0	0	0	0	0	0	0	0	0	0	0	0	0	0	0	0	0	0	0	0	0.900900900900901	0	0	0	0	4.5045045045045	1.8018018018018	0	2.7027027027027	0	0
2011/03/26	NN8-14	10	d4		0	0	0	0	0	0	0	0	0	2.88461538461538	0	0	0	0	0	0	0	0	0	0	0	0	0	0	0	0	0	0	0	0	0	0	0	0	0	0	0	0	0	4.80769230769231	2.88461538461538	0	4.80769230769231	0	0
2011/03/26	NN8-14	11	d1		0	0	0	0	0	0	0	0	0	0	0	0	0	0	1.85185185185185	0	0	0	0	0	0	0	0	0	0	0	0	0	0	0	0	0	0	0	0.925925925925926	0	0	0	0	2.77777777777778	1.85185185185185	0	0	0	0
2011/03/26	NN8-14	11	d2		0	0	0	0	0	0	0	0	0	1.8018018018018	0	0	0	0	0	0	2.7027027027027	0	0	0	0	1.8018018018018	0	0	0	0	0	0	0	0	0	0	0	0	1.8018018018018	0	0	0	0	4.5045045045045	0	0	2.7027027027027	0	0
2011/03/26	NN8-14	11	d3		0	0	0	0	0	0	0	0	0	0	0	0	0	0	0	0	0	0	0	0	0	4.85436893203883	0	0	0	0	0	0	0	0	0	0	0	0	0.970873786407767	0	0	0	0	4.85436893203883	0	0	1.94174757281553	0	0
2011/03/26	NN8-14	11	d4		0	0	0	0	0	0	0	0	0	1.73913043478261	0	0	0	0	0	0	0	0	0	0	0	4.34782608695652	0	0	0	0	0	0	0	0	0	0	0	0	0.869565217391304	0	0	0	0	4.34782608695652	1.73913043478261	0	4.34782608695652	0	0
2011/03/26	NN8-14	12	d1		0	0	0	0	0	0	0	0	0	0	0	0	0	0	2.72727272727273	0	0	0	0	0	0	0	0	0	0	0	0	0	0	0	0	0	0	0	0.909090909090909	0	0	0	0	0	0	2.72727272727273	0	0	0
2011/03/26	NN8-14	12	d2		0	0	0	0	0	0	0	0	0	2.45901639344262	0	0	0	0	0	0	2.45901639344262	0	0	0	0	0	0	0	0	0	0	0	0	0	0	0	0	0	0	0	0	0	0	0	1.63934426229508	0	0	0	0
2011/03/26	NN8-14	12	d3		0	0	0	0	0	0	0	0	0	0	0	0	0	0	0	0	0	0	0	0	0	0	0	0	0	0	0	0	0	0	0	0	0	0	2.83018867924528	0	0	0	0	0	0	0	0	0	0
2011/03/26	NN8-14	12	d4		0	0	0	0	0	0	0	0	0	1.76991150442478	0	0	0	0	0	0	0.884955752212389	0	0	0	0	0	0	0	0	0	0	0	0	0	0	0	0	0	0	0	0	0	0	4.42477876106195	0	0	4.42477876106195	0	0
2011/03/26	NN8-14	13	d1		0	0	0	0	0	0	0	0	0	2.77777777777778	0	0	0	0	1.85185185185185	0	2.77777777777778	0	0	0	0	0	0	0	0	0	0	0	0	0	0	0	0	0	3.7037037037037	0	0	0	0	2.77777777777778	2.77777777777778	0	9.25925925925926	0	0
2011/03/26	NN8-14	13	d2		0	0	0	0	0	0	0	0	0	2.72727272727273	0	0	0	0	0	0	4.54545454545455	0	0	0	0	0	0	0	0	0	0	0	0	0	0	0	0	0	2.72727272727273	0	0	0	0	4.54545454545455	2.72727272727273	0	4.54545454545455	0	0
2011/03/26	NN8-14	13	d3		4.67289719626168	0	0	0	0	0	0	0	0	2.80373831775701	0	0	0	0	0	0	0	0	0	0	0	0	0	0	0	0	0	0	0	0	0	0	0	0	2.80373831775701	0	0	0	0	2.80373831775701	2.80373831775701	0	0	0	0
2011/03/26	NN8-14	13	d4		2.72727272727273	0	0	0	0	0	0	0	0	2.72727272727273	0	0	0	0	0	0	0	0	0	0	0	0	0	0	0	0	0	0	0	0	0	0	0	0	4.54545454545455	0	0	0	0	2.72727272727273	0	0	2.72727272727273	0	0
2011/03/26	NN8-14	14	d1		0	0	0	0	0	0	0	0	14.1509433962264	0	0	0	0	0	0	0	0	0	0	0	0	0	0	0	0	0	0	0	0	0	0	0	0	0	2.83018867924528	0	0	0	0	4.71698113207547	0	0	4.71698113207547	0	0
2011/03/26	NN8-14	14	d2		0	0	0	0	0	0	0	0	19.4174757281553	2.9126213592233	0	0	0	0	0	0	0	0	0	0	0	0	0	0	0	0	0	0	0	0	0	0	0	0	0	0	0	0	0	9.70873786407767	0	0	9.70873786407767	0	0
2011/03/26	NN8-14	14	d3		0	0	0	0	0	0	0	0	18.8679245283019	2.83018867924528	0	0	0	0	0	0	0	0	0	0	0	0	0	4.71698113207547	0	0	0	0	0	0	0	0	0	0	9.43396226415094	0	0	0	0	9.43396226415094	0	0	9.43396226415094	0	0
2011/03/26	NN8-14	14	d4		0	0	0	0	0	0	0	0	12.9310344827586	0	0	0	0	0	0	0	0	0	0	0	0	0	0	4.31034482758621	0	0	0	0	0	0	0	0	0	0	4.31034482758621	0	0	0	0	8.62068965517241	0	0	8.62068965517241	0	0
2011/04/05	NN1-7	1	d1		0	28.3018867924528	0	0	0	0	0	0	0	4.71698113207547	0	0	0	0	0	0	0	0	0	0	0	0	0	0	0	0	0	0	0	0	0	0	0	0	0	0	0	0	0	4.71698113207547	0	0	2.83018867924528	2.83018867924528	0
2011/04/05	NN1-7	1	d2		0	31.5315315315315	0	0	0	0	0	0	0	9.00900900900901	0	0	0	0	0	0	0	0	0	0	0	0	0	0	0	0	0	0	0	0	0	0	0	0	0	0	0	0	0	4.5045045045045	1.8018018018018	4.5045045045045	0	0	13.5135135135135
2011/04/05	NN1-7	1	d3		0	19.047619047619	23.8095238095238	0	0	0	0	0	0	9.52380952380952	0	0	0	0	0	0	0	0	0	0	0	0	0	0	0	0	0	0	0	0	0	0	0	0	0	0	0	0	0	9.52380952380952	1.9047619047619	0	0	0	0
2011/04/05	NN1-7	1	d4		0	39.6039603960396	0	0	0	0	0	0	0	9.9009900990099	0	0	0	0	0	0	0	0	0	0	0	0	0	0	0	0	0	0	0	0	0	0	0	0	0	0	0	0	0	9.9009900990099	2.97029702970297	0	0	0	0
2011/04/05	NN1-7	2	d1		0	16.260162601626	0	0	0	0	0	0	0	8.13008130081301	0	0	0	0	0	0	0	0	0	0	0	0	0	0	0	0	0	0	0	0	0	0	0	0	0	0	0	0	0	4.0650406504065	2.4390243902439	0	0	0.813008130081301	2.4390243902439
2011/04/05	NN1-7	2	d2		0	29.126213592233	0	0	0	0	0	0	0	4.85436893203883	0	0	0	0	0	0	0	0	0	0	0	0	0	0	0	0	0	0	0	0	0	0	0	0	0	0	0	0	0	2.9126213592233	1.94174757281553	0	2.9126213592233	0	4.85436893203883
2011/04/05	NN1-7	2	d3		0	13.6363636363636	18.1818181818182	0	0	0	0	0	0	1.81818181818182	0	0	0	0	0	0	0	0	0	0	0	0	0	0	0	0	0	0	0	0	0	0	0	0	0	0	0	0	0	4.54545454545455	1.81818181818182	0	0	0	2.72727272727273
2011/04/05	NN1-7	2	d4		0	0	43.6893203883495	0	0	0	0	0	0	4.85436893203883	0	0	0	0	0	0	0	0	0	0	0	0	0	0	0	0	0	0	0	0	0	0	0	0	0	0	0	0	0	9.70873786407767	0	0	0	0	0
2011/04/05	NN1-7	3	d1		0	18.8679245283019	0	0	0	0	0	0	0	1.88679245283019	0	0	0	0	0	0	0	0	0	0	0	0	0	0	0	0	0	0	0	0	0	0	0	0	0	0	0	0	0	2.83018867924528	0	0	0	0	0
2011/04/05	NN1-7	3	d2		0	22.9357798165138	0	0	0	0	0	0	0	2.75229357798165	0	0	0	0	0	0	0	0	0	0	0	0	0	0	0	0	0	0	0	0	0	0	0	0	0	0	0	0	0	1.8348623853211	0	0	0	0	0
2011/04/05	NN1-7	3	d3		0	14.5631067961165	29.126213592233	0	0	0	0	0	0	2.9126213592233	0	0	0	0	0	0	0	0	0	0	0	0	0	0	0	0	0	0	0	0	0	0	0	0	0	0	0	0	0	4.85436893203883	0	0	0	0	0
2011/04/05	NN1-7	3	d4		0	38.8349514563107	0	0	0	0	0	0	0	1.94174757281553	0	0	0	0	0	0	0	0	0	0	0	0	0	0	0	0	0	0	0	0	0	0	0	0	0	0	0	0	0	14.5631067961165	2.9126213592233	0	2.9126213592233	0	0
2011/04/05	NN1-7	4	d1		0	0	0	0	0	0	0	0	0	2.9126213592233	0	0	0	0	4.85436893203883	0	0	0	0	0	0	0	0	0	0	0	0	0	0	0	0	0	0	0	0	0	0	0	0	4.85436893203883	4.85436893203883	0	0	0	0
2011/04/05	NN1-7	4	d2		0	0	0	0	0	0	0	0	0	4.76190476190476	0	0	0	0	9.52380952380952	0	0	0	0	0	0	0	0	0	0	0	0	0	0	0	0	0	0	0	0	0	0	0	0	4.76190476190476	0	0	0	0	0
2011/04/05	NN1-7	4	d3		0	0	0	0	0	0	0	0	0	4.80769230769231	0	0	0	0	9.61538461538462	0	0	0	0	0	0	0	0	0	0	0	0	0	0	0	0	0	0	0	0	0	0	0	0	1.92307692307692	0	0	0	0	1.92307692307692
2011/04/05	NN1-7	4	d4		0	0	0	0	0	0	0	0	0	2.35294117647059	0	0	0	0	11.7647058823529	0	0	0	0	0	0	0	0	0	0	0	0	0	0	0	0	0	0	0	0	0	0	0	0	5.88235294117647	0	0	5.88235294117647	0	0
2011/04/05	NN1-7	5	d1		0	0	0	0	0	0	0	0	0	2.94117647058824	0	0	0	0	0	0	0	0	0	0	0	0	0	0	0	0	0	0	0	0	0	0	0	0	0	0	0	0	0	4.90196078431373	2.94117647058824	0	0.980392156862745	0	0
2011/04/05	NN1-7	5	d2		0	0	0	0	0	0	0	0	0	0	2.77777777777778	0	0	0	0	0	0	0	0	0	0	0	0	0	0	0	0	0	0	0	0	0	0	0	0	0	0	0	0	4.62962962962963	2.77777777777778	0	0	0	4.62962962962963
2011/04/05	NN1-7	5	d3		0	0	0	0	0	0	0	0	0	5.20833333333333	0	0	0	0	0	0	0	0	0	0	0	0	0	0	0	0	0	0	0	0	0	0	0	0	0	0	0	0	0	3.125	0	0	0	0	0
2011/04/05	NN1-7	5	d4		0	0	0	0	0	0	0	0	0	4.90196078431373	0	0	0	0	0	0	0	0	0	0	0	0	0	0	0	0	0	0	0	0	0	0	0	0	0	0	0	0	0	4.90196078431373	0	1.96078431372549	4.90196078431373	0	0
2011/04/05	NN1-7	6	d1		0	0	0	0	0	0	0	2.83018867924528	0	0	2.83018867924528	0	0	0	0	0	0	0	0	0	0	0	0	0	0	0	0	0	0	0	0	0	0	0	0	0	0	0	0	4.71698113207547	1.88679245283019	0	0	0	2.83018867924528
2011/04/05	NN1-7	6	d2		0	0	0	0	0	0	0	0	0	0.87719298245614	0	0	0	0	0	0	0	0	0	0	0	0	0	0	0	0	0	0	0	0	0	0	0	0	0	0	0	0	0	0	4.3859649122807	0	0	0	4.3859649122807
2011/04/05	NN1-7	6	d3		0	0	0	0	0	0	0	0	0	0.961538461538462	9.61538461538462	0	0	0	0	0	0	0	0	0	0	0	0	0	0	0	0	0	0	0	0	0	0	0	0	0	0	0	0	2.88461538461538	1.92307692307692	0	0	0	0
2011/04/05	NN1-7	6	d4		0	0	0	0	0	0	0	0	0	0	2.83018867924528	0	0	0	0	0	0	0	0	0	0	0	0	0	0	0	0	0	0	0	0	0	0	0	0	0	0	0	0	2.83018867924528	1.88679245283019	0	4.71698113207547	0	0
2011/04/06	NN1-7	7	d1		0	0	0	0	0	0	0	0	0	2.75229357798165	0	0	22.9357798165138	0	0	0	0	0	0	0	0	0	0	0	0	0	0	0	0	0	0	0	0	0	0	0	0	0	0	2.75229357798165	1.8348623853211	0	2.75229357798165	0	0
2011/04/06	NN1-7	7	d2		0	0	0	0	0	0	0	0	0	2.83018867924528	0	0	42.4528301886792	0	0	0	0	0	0	0	0	0	0	0	0	0	0	0	0	0	0	0	0	0	0	0	0	0	0	1.88679245283019	0.943396226415094	0	1.88679245283019	0	0
2011/04/06	NN1-7	7	d3		0	0	0	0	0	0	0	0	0	4.90196078431373	0	0	29.4117647058824	0	0	0	0	0	0	0	0	0	0	0	0	0	0	0	0	0	0	0	0	0	0	0	0	0	0	1.96078431372549	0	0	4.90196078431373	0	0
2011/04/06	NN1-7	7	d4		0	0	0	0	0	0	0	0	0	0	0	0	4.85436893203883	0	0	0	0	4.85436893203883	0	0	0	0	4.85436893203883	0	0	0	0	0	0	0	0	0	0	0	0	0	0	0	0	19.4174757281553	0	0	2.9126213592233	0	0
2011/04/06	NN8-14	8	d1		0	0	0	0	0	0	0	0	0	2.94117647058824	0	0	4.90196078431373	0	0	0	0	0	0	0	0	4.90196078431373	0	0	0	0	0	0	0	0	0	0	0	0	0	0	0	0	0	0	2.94117647058824	2.94117647058824	2.94117647058824	0	0
2011/04/06	NN8-14	8	d2		0	0	0	0	0	0	0	0	0	0	0	0	4.90196078431373	0	0	0	0	0	0	0	0	0.980392156862745	0	0	0	0	0	0	0	0	0	0	0	0	0	0	0	0	0	0	0	2.94117647058824	2.94117647058824	0	0
2011/04/06	NN8-14	8	d3		0	0	0	0	0	0	0	0	0	2.85714285714286	0	0	4.76190476190476	0	0	0	0	2.85714285714286	0	0	0	0	0	0	0	0	0	0	0	0	0	0	0	0	0	0	0	0	0	2.85714285714286	0	0	2.85714285714286	0	2.85714285714286
2011/04/06	NN8-14	8	d4		0	0	0	0	0	0	0	0	0	0	0	0	0	0	0	0	0	4.85436893203883	0	0	0	0	0	0	0	0	0	0	0	0	0	0	0	0	0	0	0	0	0	19.4174757281553	0	0	4.85436893203883	2.9126213592233	0
2011/04/06	NN8-14	9	d1		0	0	0	0	0	0	0	0	0	2	0	0	0	0	0	0	0	0	0	0	0	0	0	0	0	0	0	0	0	0	0	0	0	0	2	0	0	0	0	3	3	0	0	0	0
2011/04/06	NN8-14	9	d2		0	0	0	0	0	0	0	0	0	3.03030303030303	0	0	0	0	0	0	0	0	0	0	0	0	0	0	0	0	0	0	0	0	0	0	0	0	3.03030303030303	0	0	0	0	3.03030303030303	2.02020202020202	0	0	0	3.03030303030303
2011/04/06	NN8-14	9	d3		0	0	0	0	0	0	0	0	0	2.88461538461538	0	0	0	0	0	0	0	0	0	0	0	0	0	0	0	0	0	0	0	0	0	0	0	0	2.88461538461538	0	0	0	0	4.80769230769231	0	0	2.88461538461538	0	0
2011/04/06	NN8-14	9	d4		0	0	0	0	0	0	0	0	0	2.88461538461538	0	0	0	0	0	0	0	0	0	0	0	0	0	0	0	0	0	0	0	0	0	0	0	0	2.88461538461538	0	0	0	0	9.61538461538462	2.88461538461538	0	9.61538461538462	0	0
2011/04/06	NN8-14	10	d1		0	0	0	0	0	0	0	0	0	0	0	0	0	0	4.80769230769231	0	0	0	0	0	0	0	0	0	0	0	0	0	0	0	0	0	0	0	2.88461538461538	0	0	0	0	4.80769230769231	2.88461538461538	0	2.88461538461538	0	0
2011/04/06	NN8-14	10	d2		0	0	0	0	0	0	0	0	0	0.934579439252336	0	0	0	0	0	0	0	0	0	0	0	0	0	0	0	0	0	0	0	0	0	0	0	0	1.86915887850467	0	0	0	0	2.80373831775701	2.80373831775701	0	4.67289719626168	0	0
2011/04/06	NN8-14	10	d3		0	0	0	0	0	0	0	0	0	0	0	0	0	0	0	0	0	0	0	0	0	0	0	0	0	0	0	0	0	0	0	0	0	0	1.98019801980198	0	0	0	0	4.95049504950495	1.98019801980198	0	4.95049504950495	0	0
2011/04/06	NN8-14	10	d4		0	0	0	0	0	0	0	0	0	1.98019801980198	0	0	0	0	0	0	0	0	0	0	0	0	0	0	0	0	0	0	0	0	0	0	0	0	0.99009900990099	0	0	0	0	9.9009900990099	0	0	9.9009900990099	2.97029702970297	0
2011/04/07	NN8-14	11	d1		0	0	0	0	0	0	0	0	0	0.917431192660551	0	0	0	0	1.8348623853211	0	0	0	0	0	0	0	0	0	0	0	0	0	0	0	0	0	0	0	0	0	0	0	0	4.58715596330275	0	0	2.75229357798165	0	0
2011/04/07	NN8-14	11	d2		0	0	0	0	0	0	0	0	0	0.970873786407767	0	0	0	0	0	0	2.9126213592233	0	0	0	0	1.94174757281553	0	0	0	0	0	0	0	0	0	0	0	0	2.9126213592233	0	0	0	0	9.70873786407767	0	0	2.9126213592233	0	0
2011/04/07	NN8-14	11	d3		0	0	0	0	0	0	0	0	0	0	0	0	0	0	0	0	0	0	0	0	0	4.80769230769231	0	0	0	0	0	0	0	0	0	0	0	0	0.961538461538462	0	0	0	0	4.80769230769231	0	2.88461538461538	4.80769230769231	0	0
2011/04/07	NN8-14	11	d4		0	0	0	0	0	0	0	0	0	1.92307692307692	0	0	0	0	0	0	0	0	0	0	0	4.80769230769231	0	0	0	0	0	0	0	0	0	0	0	0	1.92307692307692	0	0	0	0	4.80769230769231	0	0	9.61538461538462	0	0
2011/04/07	NN8-14	12	d1		0	0	0	0	0	0	0	0	0	0	0	0	0	0	4.46428571428571	0	0	0	0	0	0	0	0	0	0	0	0	0	0	0	0	0	0	0	1.78571428571429	0	0	0	0	4.46428571428571	0	2.67857142857143	2.67857142857143	1.78571428571429	0
2011/04/07	NN8-14	12	d2		3.125	0	0	0	0	0	0	0	0	0	0	0	0	0	0	0	1.04166666666667	0	0	0	0	0	0	0	0	0	0	0	0	0	0	0	0	3.125	3.125	0	0	0	0	5.20833333333333	0	0	5.20833333333333	0	0
2011/04/07	NN8-14	12	d3		4.80769230769231	0	0	0	0	0	0	0	0	0	0	0	0	0	0	0	0	0	0	0	0	0	0	0	0	0	0	0	0	0	0	0	0	2.88461538461538	2.88461538461538	0	0	0	0	2.88461538461538	0	0	2.88461538461538	0	0
2011/04/07	NN8-14	12	d4		4.90196078431373	0	0	0	0	0	0	0	0	0	0	0	0	0	0	0	0	0	0	0	0	0	0	0	0	0	0	0	0	0	0	0	0	2.94117647058824	0	0	0	0	0	2.94117647058824	0	0	2.94117647058824	0	0
2011/04/07	NN8-14	13	d1		3.09278350515464	0	0	0	0	0	0	0	0	0	3.09278350515464	0	0	0	5.15463917525773	0	0	0	0	0	0	0	0	0	0	0	0	0	0	0	0	0	0	0	0	0	0	0	0	3.09278350515464	0	0	15.4639175257732	0	0
2011/04/07	NN8-14	13	d2		0	0	0	0	0	0	0	0	0	0	0	0	0	0	0	0	2.9126213592233	0	0	0	0	0	0	0	0	0	0	0	0	0	0	0	0	0	0.970873786407767	0	0	0	0	2.9126213592233	0	0	2.9126213592233	0	0
2011/04/07	NN8-14	13	d3		0	0	0	0	0	0	0	0	0	1.94174757281553	0	0	0	0	0	0	0	0	0	0	0	0	0	0	0	0	0	0	0	0	0	0	0	0	1.94174757281553	0	0	0	0	2.9126213592233	0	0	2.9126213592233	0	0
2011/04/07	NN8-14	13	d4		0	0	0	0	0	0	0	0	0	2.83018867924528	0	0	0	0	0.943396226415094	0	0	0	0	0	0	0	0	0.943396226415094	0	0	0	0	0	0	0	0	0	0.943396226415094	0.943396226415094	0	0	0	0	4.71698113207547	0	0	4.71698113207547	0	0
2011/04/07	NN8-14	14	d1		0	0	0	0	0	0	0	0	0	0	2.77777777777778	0	0	0	0	0	0	0	0	0	0	0	0	0	0	0	0	0	0	0	0	0	0	18.5185185185185	4.62962962962963	0	0	0	0	0	0	0	4.62962962962963	0	0
2011/04/07	NN8-14	14	d2		2.9126213592233	0	0	0	0	0	0	0	0	0	0	0	0	0	0	0	0	0	0	0	0	0	0	4.85436893203883	2.9126213592233	0	0	0	0	0	0	0	0	29.126213592233	0	0	0	0	0	9.70873786407767	0	0	4.85436893203883	0	0
2011/04/07	NN8-14	14	d3		2.97029702970297	0	0	0	0	0	0	0	0	0	0	0	0	0	0	0	0	0	0	0	0	0	0	4.95049504950495	0	0	0	2.97029702970297	0	0	0	0	0	29.7029702970297	0	0	0	0	0	9.9009900990099	0	0	9.9009900990099	0	0
2011/04/07	NN8-14	14	d4		5	0	0	0	0	0	0	0	0	0	0	0	0	0	0	0	0	0	0	0	0	0	0	5	0	0	0	0	0	0	0	0	0	15	0	0	0	0	0	10	0	0	10	0	0
2011/04/08	SW	1	d1		0	0	0.943396226415094	0	0	0	0	0	0	0	0	0	0	0	0	0	4.71698113207547	0	0	0	0	0	0	0	0	0	0	0	0	0	0	0	0	0	0	0	0	0	0	2.83018867924528	0	0	4.71698113207547	0	0
2011/04/08	SW	1	d2		0	0	2	0	0	0	0	0	0	0	0	5	0	0	0	0	5	0	0	0	0	0	0	0	0	0	0	0	0	0	0	0	0	0	0	0	0	0	0	0	5	0	0	0	0
2011/04/08	SW	1	d3		0	0	5.10204081632653	0	0	0	0	0	0	0	0	2.04081632653061	0	5.10204081632653	0	0	5.10204081632653	0	0	0	0	0	0	0	0	0	0	0	0	0	0	0	0	0	0	0	0	0	0	0	0	0	0	0	0
2011/04/08	SW	1	d4		0	0	4.71698113207547	0	0	0	0	0	0	0	0	18.8679245283019	0	2.83018867924528	0	0	4.71698113207547	0	0	0	0	0	0	0	0	0	0	0	0	0	0	0	0	0	0	0	0	0	0	0	0	2.83018867924528	4.71698113207547	0	0
2011/04/08	SW	2	d1		0	0	5.10204081632653	0	0	0	0	0	0	0	0	5.10204081632653	0	3.06122448979592	0	0	5.10204081632653	0	0	0	0	0	0	0	0	0	0	0	0	0	0	0	0	0	0	0	0	0	0	0	2.04081632653061	0	0	0	0
2011/04/08	SW	2	d2		0	0	9.43396226415094	0	0	0	0	0	0	0	0	12.2641509433962	0	0	0	0	2.83018867924528	0	0	0	0	0	0	0	0	0	0	0	0	0	0	0	0	0	0	0	0	0	0	0	1.88679245283019	0	0	0	0
2011/04/08	SW	2	d3		0	0	4.95049504950495	0	0	0	0	0	0	0	0	4.95049504950495	0	0	0	0	4.95049504950495	0	0	0	0	0	0	0	0	0	0	0	0	0	0	0	0	0	0	0	0	0	0	0	0	0	0	0	0
2011/04/08	SW	2	d4		0	0	9.52380952380952	0	0	0	0	0	0	0	0	9.52380952380952	0	0	0	0	4.76190476190476	0	0	0	0	0	0	0	0	0	0	0	0	0	0	0	0	0	0	0	0	0	0	0	0	0	4.76190476190476	0	9.52380952380952
2011/04/08	SW	3	d1		0	0	2.77777777777778	0	0	0	0	0	0	0	0	9.25925925925926	0	2.77777777777778	0	0	4.62962962962963	0	0	0	0	0	0	0	0	0	0	0	0	0	0	0	0	0	2.77777777777778	0	0	0	0	0	1.85185185185185	0	1.85185185185185	0	0
2011/04/08	SW	3	d2		0	0	0	0	0	0	0	0	0	0	0	10	0	0	0	0	3	0	0	0	0	0	0	0	0	0	0	0	0	0	0	0	0	0	8	0	0	0	0	0	0	0	0	0	0
2011/04/08	SW	3	d3		0	0	4.76190476190476	0	0	0	0	0	0	0	0	0	0	2.85714285714286	0	0	2.85714285714286	0	0	0	0	0	0	0	0	0	0	0	0	0	0	0	0	0	4.76190476190476	0	0	0	0	0	0	0	0	0	0
2011/04/08	SW	3	d4		0	0	3.06122448979592	0	0	0	0	0	0	0	0	15.3061224489796	0	5.10204081632653	0	0	3.06122448979592	0	0	0	0	0	0	0	0	0	0	0	0	0	0	0	0	0	2.04081632653061	0	0	0	0	0	0	0	5.10204081632653	0	0
2011/04/08	SW	4	d1		0	0	4.80769230769231	0	0	0	0	0	0	0	0	2.88461538461538	0	0	0	0	0	0	0	0	0	0	0	0	0	0	0	0	0	0	0	0	0	0	2.88461538461538	0	0	0	0	0	2.88461538461538	0	0	0	0
2011/04/08	SW	4	d2		0	0	4.80769230769231	0	0	0	0	0	0	0	0	0	0	0	0	0	0	0	0	0	0	0	0	0	0	0	0	0	0	0	0	0	0	0	14.4230769230769	0	0	0	0	4.80769230769231	0	0	0	0	0
2011/04/08	SW	4	d3		0	0	5.15463917525773	0	0	0	0	0	0	0	0	0	0	2.06185567010309	0	0	0	0	0	0	0	0	0	0	0	0	0	0	0	0	0	0	0	0	5.15463917525773	0	0	0	0	3.09278350515464	0	0	3.09278350515464	0	0
2011/04/08	SW	4	d4		0	0	2.94117647058824	0	0	0	0	0	0	0	0	2.94117647058824	0	0	0	0	0	0	0	0	0	0	0	0	0	0	0	0	0	0	0	0	0	0	4.90196078431373	0	0	0	0	0	4.90196078431373	2.94117647058824	9.80392156862745	0	0
2011/04/10	SE	1	d1		0	0	0	0	0	0	0	0	0	2.02020202020202	0	10.1010101010101	0	0	0	0	0	0	0	0	0	0	0	0	0	0	0	0	0	0	0	0	0	0	0	0	0	0	0	10.1010101010101	0	0	0	0	0
2011/04/10	SE	1	d2		0	0	0	0	0	0	0	0	0	2.80373831775701	0	4.67289719626168	0	0	0	0	0	0	0	0	0	0	0	0	0	0	0	14.018691588785	0	0	0	0	0	0	0	0	0	0	0	0	0	0	0	0	4.67289719626168
2011/04/10	SE	1	d3		0	0	0	0	0	0	0	0	0	0	0	4.71698113207547	0	1.88679245283019	0	4.71698113207547	4.71698113207547	2.83018867924528	0	0	0	0	0	0	0	0	0	0	0	0	0	0	0	0	0	0	0	0	0	2.83018867924528	0	0	0	0	2.83018867924528
2011/04/10	SE	1	d4		0	0	0	0	0	0	0	0	0	0	0	3.09278350515464	0	0	0	2.06185567010309	5.15463917525773	3.09278350515464	0	0	0	0	0	0	0	0	0	0	3.09278350515464	0	0	0	0	0	0	0	0	0	0	5.15463917525773	0	0	3.09278350515464	0	0
2011/04/10	SE	2	d1		0	0	0	0	0	0	0	0	0	1.9047619047619	0	19.047619047619	0	0	0	0	0	0	0	0	0	0	0	0	0	0	0	0	0	0	0	0	0	0	4.76190476190476	0	0	0	0	2.85714285714286	1.9047619047619	0	0.952380952380952	0	0
2011/04/10	SE	2	d2		0	2.85714285714286	0	0	0	0	0	0	0	0	0	23.8095238095238	0	0	0	0	0	0	0	0	0	0	0	0	0	0	0	0	0	0	0	0	0	0	4.76190476190476	0	0	0	0	2.85714285714286	0	0	0	0	4.76190476190476
2011/04/10	SE	2	d3		0	0	9.61538461538462	0	0	0	0	0	0	0	0	19.2307692307692	0	0	0	0	0	0	0	0	0	0	0	0	0	0	0	0	0	0	0	0	0	0	9.61538461538462	0	0	0	0	2.88461538461538	1.92307692307692	0	0.961538461538462	0	4.80769230769231
2011/04/10	SE	2	d4		0	0	0	0	0	0	0	0	0	0	0	25.2525252525253	0	0	0	0	0	0	0	0	0	0	0	0	0	0	0	0	0	0	0	0	0	0	0	0	0	0	0	3.03030303030303	0	0	0	0	0
2011/04/10	SE	3	d1		0	0	0	0	0	0	0	0	0	0	0	4.85436893203883	2.9126213592233	0	0	0	0	2.9126213592233	0	0	0	0	0	0	0	0	0	0	0	0	0	0	0	2.9126213592233	2.9126213592233	0	0	0	0	4.85436893203883	0	0	0	2.9126213592233	0
2011/04/10	SE	3	d2		0	4.76190476190476	0	0	0	0	0	0	0	0	0	4.76190476190476	4.76190476190476	0	0	0	0	4.76190476190476	0	0	0	0	0	0	0	0	0	0	0	0	0	0	0	0	2.85714285714286	0	0	0	0	2.85714285714286	0	0	2.85714285714286	0	0
2011/04/10	SE	3	d3		0	0	2.85714285714286	0	0	0	0	0	0	0	0	9.52380952380952	2.85714285714286	0	0	0	0	4.76190476190476	0	0	0	0	0	0	0	0	0	0	0	0	0	0	0	0	2.85714285714286	0	0	0	0	0	0	0	4.76190476190476	0	0
2011/04/10	SE	3	d4		0	0	0	0	0	0	0	0	0	2.85714285714286	0	4.76190476190476	2.85714285714286	0	0	0	0	2.85714285714286	0	0	0	0	0	0	0	0	0	0	0	0	0	0	0	0	0	0	0	0	0	0	0	0	2.85714285714286	0	0
2011/04/10	SE	4	d1		0	0	0	0	0	0	0	0	0	1.92307692307692	0	4.80769230769231	1.92307692307692	0	0	0	0	1.92307692307692	0	0	0	0	0	0	0	0	0	0	0	0	0	0	0	0	0	0	0	0	0	4.80769230769231	0	0	2.88461538461538	0	0
2011/04/10	SE	4	d2		0	0	0	0	0	0	0	0	0	1.88679245283019	0	9.43396226415094	0	0	0	0	0	0	0	0	0	0	0	0	0	0	0	0	0	0	0	0	0	0	2.83018867924528	0	0	0	0	2.83018867924528	0	0	4.71698113207547	0	2.83018867924528
2011/04/10	SE	4	d3		0	0	4.90196078431373	0	0	0	0	0	0	0	0	9.80392156862745	2.94117647058824	0	0	0	0	2.94117647058824	0	0	0	0	0	0	0	0	0	0	0	0	0	0	0	0	4.90196078431373	0	0	0	0	2.94117647058824	0	0	2.94117647058824	0	0
2011/04/10	SE	4	d4		0	0	0	0	0	0	0	0	0	0	0	5.43478260869565	10.8695652173913	0	0	0	0	0	0	0	0	0	0	0	0	0	0	0	0	0	0	0	0	0	0	0	0	0	0	3.26086956521739	0	0	3.26086956521739	0	0
2011/04/16	NN1-7	1	d1		0	40	0	0	0	0	0	0	0	5	0	0	0	0	0	0	0	0	0	0	0	0	0	0	0	0	0	0	0	0	0	0	0	0	0	0	0	0	0	5	0	0	5	5	5
2011/04/16	NN1-7	1	d2		0	37.7358490566038	0	0	0	0	0	0	0	4.71698113207547	0	0	0	0	0	0	0	0	0	0	0	0	0	0	0	0	0	0	0	0	0	0	0	0	0	0	0	0	0	4.71698113207547	0	4.71698113207547	0	0	18.8679245283019
2011/04/16	NN1-7	1	d3		0	25	30	0	0	0	0	0	0	10	0	0	0	0	0	0	0	0	0	0	0	0	0	0	0	0	0	0	0	0	0	0	0	0	0	0	0	0	0	10	0	0	0	0	0
2011/04/16	NN1-7	1	d4		0	0	39.2156862745098	0	0	0	0	0	0	0	0	0	0	0	0	0	0	0	0	0	0	0	0	0	0	0	0	0	0	0	0	0	0	4.90196078431373	0	0	0	0	0	9.80392156862745	0	0	0	0	0
2011/04/16	NN1-7	2	d1		0	19.6078431372549	0	0	0	0	0	0	0	2.94117647058824	0	0	0	0	0	0	0	0	0	0	0	0	0	0	0	0	0	0	0	0	0	0	0	4.90196078431373	0	0	0	0	0	4.90196078431373	0	0	2.94117647058824	2.94117647058824	0
2011/04/16	NN1-7	2	d2		0	35.7142857142857	0	0	0	0	0	0	0	0	0	0	0	0	0	0	0	0	0	0	0	0	0	0	0	0	0	0	0	0	0	0	0	5.10204081632653	0	0	0	0	0	5.10204081632653	0	0	5.10204081632653	0	3.06122448979592
2011/04/16	NN1-7	2	d3		0	20	30	0	0	0	0	0	0	0	0	0	0	0	0	0	0	0	0	0	0	0	0	0	0	0	0	0	0	0	0	0	0	0	0	0	0	0	0	5	0	0	0	0	5
2011/04/16	NN1-7	2	d4		0	0	49.0196078431373	0	0	0	0	0	0	0	0	0	0	0	0	0	0	0	0	0	0	0	0	0	0	0	0	0	0	0	0	0	0	1.96078431372549	0	0	0	0	0	4.90196078431373	0	0	0	0	0
2011/04/16	NN1-7	3	d1		0	14.1509433962264	0	0	0	0	0	0	0	2.83018867924528	0	0	0	0	0	0	0	0	0	0	0	0	0	0	0	0	0	0	0	0	0	0	0	0	0	0	0	0	0	0	0	1.88679245283019	0	0	0
2011/04/16	NN1-7	3	d2		0	19.8019801980198	0	0	0	0	0	0	0	2.97029702970297	0	0	0	0	0	0	0	0	0	0	0	0	0	0	0	0	0	0	0	0	0	0	0	0	0	0	0	0	0	2.97029702970297	0	0	0	0	4.95049504950495
2011/04/16	NN1-7	3	d3		0	12.1951219512195	32.520325203252	0	0	0	0	0	0	0	2.4390243902439	0	0	0	0	0	0	0	0	0	0	0	0	0	0	0	0	0	0	0	0	0	0	0	0	0	0	0	0	8.13008130081301	0	0	0	0	0
2011/04/16	NN1-7	3	d4		0	0	30	0	0	0	0	0	0	0	0	0	0	0	0	0	0	0	0	0	0	0	0	0	0	0	0	0	0	0	0	0	0	0	0	0	0	0	0	10	0	0	5	0	5
2011/04/16	NN1-7	4	d1		0	0	0	0	0	0	0	0	0	3.09278350515464	0	0	0	0	10.3092783505155	0	0	0	0	0	0	0	0	0	0	0	0	0	0	0	0	0	0	0	0	0	0	0	0	5.15463917525773	2.06185567010309	0	0	0	0
2011/04/16	NN1-7	4	d2		0	0	0	0	0	0	0	0	0	0	5	0	0	0	10	0	0	0	0	0	0	0	0	0	0	0	0	0	0	0	0	0	0	0	0	0	0	0	0	5	0	0	0	0	0
2011/04/16	NN1-7	4	d3		0	0	0	0	0	0	0	0	0	0	5	0	0	0	10	0	0	0	0	0	0	0	0	0	0	0	0	0	0	0	0	0	0	0	0	0	0	0	0	3	2	0	0	0	5
2011/04/16	NN1-7	4	d4		0	0	0	0	0	0	0	0	0	0	2.97029702970297	0	0	0	9.9009900990099	0	0	0	0	0	0	0	0	2.97029702970297	0	0	0	0	0	0	0	0	0	0	0	0	0	0	0	4.95049504950495	0	0	9.9009900990099	0	0
2011/04/17	NN1-7	5	d1		0	0	0	0	0	0	0	0	0	2.97029702970297	0	0	0	0	0	0	0	0	0	0	0	0	0	0	0	0	0	0	0	0	0	0	0	0	0	0	0	0	0	4.95049504950495	0	0	2.97029702970297	0	0
2011/04/17	NN1-7	5	d2		0	0	0	0	0	0	0	0	0	0	2.97029702970297	0	0	0	0	0	0	0	0	0	0	0	0	0	0	0	0	0	0	0	0	0	0	0	0	0	0	0	0	4.95049504950495	4.95049504950495	0	0	0	4.95049504950495
2011/04/17	NN1-7	5	d3		0	0	0	0	0	0	0	0	0	0	3.125	0	0	0	0	0	0	10.4166666666667	0	0	0	0	0	0	0	0	0	0	0	0	0	0	0	0	0	0	0	0	0	3.125	0	0	5.20833333333333	0	0
2011/04/17	NN1-7	5	d4		0	0	0	0	0	0	0	0	0	0	2.97029702970297	0	0	0	0	0	0	2.97029702970297	0	0	0	0	0	0	0	0	0	0	0	0	0	0	0	0	0	0	0	0	0	4.95049504950495	0	0	9.9009900990099	0	0
2011/04/17	NN1-7	6	d1		0	0	0	0	0	0	0	0	0	0	2.97029702970297	0	0	0	0	0	0	0	0	0	0	0	0	0	0	0	0	0	0	0	0	0	0	0	0	0	0	0	0	4.95049504950495	0	0	0	0	4.95049504950495
2011/04/17	NN1-7	6	d2		0	0	0	0	0	0	0	0	0	2.9126213592233	0	0	0	0	0	0	0	0	0	0	0	0	0	0	0	0	0	0	0	0	0	0	0	0	0	0	0	0	0	4.85436893203883	4.85436893203883	0	0	0	4.85436893203883
2011/04/17	NN1-7	6	d3		0	0	0	0	0	0	0	0	0	0	5	0	0	0	0	0	0	0	0	0	0	0	0	0	0	0	0	0	0	0	0	0	0	0	0	0	0	0	0	5	0	0	5	0	0
2011/04/17	NN1-7	6	d4		0	0	0	0	0	0	0	0	0	0	5	0	0	0	0	0	0	0	0	0	0	0	0	0	0	0	0	0	0	0	0	0	0	0	0	0	0	0	0	5	0	0	15	0	0
2011/04/19	NN1-7	7	d1		0	0	0	0	0	0	0	0	0	2.80373831775701	0	0	28.0373831775701	0	0	0	0	0	0	0	0	0	0	0	0	0	0	0	0	0	0	0	0	0	0	0	0	0	0	2.80373831775701	1.86915887850467	0	4.67289719626168	0	0
2011/04/19	NN1-7	7	d2		0	0	0	0	0	0	0	0	0	2.97029702970297	0	0	54.4554455445545	0	0	0	0	0	0	0	0	0	0	0	0	0	0	0	0	0	0	0	0	0	0	0	0	0	0	0	0	0	2.97029702970297	0	0
2011/04/19	NN1-7	7	d3		0	0	0	0	0	0	0	0	0	2.97029702970297	0	0	34.6534653465347	0	0	0	0	0	0	0	0	0	0	0	0	0	0	0	0	0	0	0	0	0	0	0	0	0	0	2.97029702970297	0	0	4.95049504950495	0	0
2011/04/19	NN1-7	7	d4		0	0	0	0	0	0	0	0	0	3.06122448979592	0	0	5.10204081632653	0	0	0	0	5.10204081632653	0	0	0	0	0	0	0	0	0	0	0	0	0	0	0	0	0	0	0	0	0	20.4081632653061	0	0	10.2040816326531	0	0
2011/04/19	NN8-14	8	d1		0	0	0	0	0	0	0	0	0	2.80373831775701	0	0	2.80373831775701	0	0	0	0	0	0	0	0	9.34579439252336	0	0	0	0	0	0	0	0	0	0	0	0	0	0	0	0	0	0	0	0	2.80373831775701	0	0
2011/04/19	NN8-14	8	d2		0	0	0	0	0	0	0	0	0	0	0	0	2.88461538461538	0	0	0	0	0	0	0	0	2.88461538461538	0	0	0	0	0	0	0	0	0	0	0	0	0	0	0	0	0	4.80769230769231	0	4.80769230769231	9.61538461538462	0	0
2011/04/19	NN8-14	8	d3		0	0	0	0	0	0	0	0	0	0	0	0	3	0	0	0	0	2	0	0	0	0	0	0	0	0	0	0	0	0	0	0	0	0	0	0	0	0	0	5	0	0	10	0	5
2011/04/19	NN8-14	8	d4		0	0	0	0	0	0	0	0	0	0	0	0	0	0	0	0	0	5	0	0	0	0	0	0	0	0	0	0	0	0	0	0	0	0	0	0	0	0	0	10	0	0	20	0	0
2011/04/19	NN8-14	9	d1		0	0	0	0	0	0	0	0	0	0	0	0	0	0	0	0	0	0	0	0	0	0	0	0	0	0	0	0	0	0	0	0	0	0	1.92307692307692	0	0	0	0	0	9.61538461538462	0	14.4230769230769	0	0
2011/04/19	NN8-14	9	d2		0	0	0	0	0	0	0	0	0	0	1.94174757281553	0	0	0	0	0	0	0	0	0	0	0	0	0	0	0	0	0	0	0	0	0	0	0	2.9126213592233	0	0	0	0	2.9126213592233	0	0	9.70873786407767	0	4.85436893203883
2011/04/19	NN8-14	9	d3		0	0	0	0	0	0	0	0	0	0	2.85714285714286	0	0	0	0	0	0	0	0	0	0	0	0	0	1.9047619047619	0	0	0	0	0	0	0	0	0	1.9047619047619	0	0	0	0	9.52380952380952	0	0	14.2857142857143	0	0
2011/04/19	NN8-14	9	d4		0	0	0	0	0	0	0	0	0	0	4.90196078431373	0	0	0	0	0	0	0	0	0	0	0	0	0	0	0	0	0	0	0	0	0	0	0	0.980392156862745	0	0	0	0	4.90196078431373	2.94117647058824	0	29.4117647058824	0	0
2011/04/20	NN8-14	10	d1		0	0	0	0	0	0	0	0	0	1.92307692307692	0	0	0	0.961538461538462	4.80769230769231	0	0	0	0	0	0	0	0	0	0	0	0	0	0	0	0	0	0	0	0.961538461538462	0	0	0	0	9.61538461538462	0	0	19.2307692307692	0	0
2011/04/20	NN8-14	10	d2		0	0	0	0	0	0	0	0	0	0	0	0	0	0	0	0	0	0	0	0	0	0	0	0	0	0	0	0	0	0	0	0	0	0	1.98019801980198	0	0	0	0	4.95049504950495	0	0	29.7029702970297	0	0
2011/04/20	NN8-14	10	d3		0	0	0	0	0	0	0	0	0	0	0.980392156862745	0	0	0	0	0	0	0	0	0	0	0	0	0	0	0	0	0	0	0	0	0	0	0	0.980392156862745	0	0	0	0	9.80392156862745	1.96078431372549	0	34.3137254901961	0	0
2011/04/20	NN8-14	10	d4		0	0	0	0	0	0	0	0	0	0	1.9047619047619	0	0	0	0	0	0	0	0	0	0	0	0	0	0	0	0	0	0	0	0	0	0	0	0.952380952380952	0	0	0	0	9.52380952380952	4.76190476190476	0	33.3333333333333	0	0
2011/04/20	NN8-14	11	d1		0	0	0	0	0	0	0	0	0	0	0	0	0	0	0	0	0	0	0	0	0	0	0	0	0	0	0	0	0	0	0	0	0	0	0.980392156862745	0	0	0	0	14.7058823529412	0	0	14.7058823529412	0	0
2011/04/20	NN8-14	11	d2		0	0	0	0	0	0	0	0	0	0	0	0	0	0	0	0	0	0	0	0	0	0	0	0	0	0	0	0	0	0	0	0	0	0	2.97029702970297	0	0	0	0	29.7029702970297	0	0	29.7029702970297	0	0
2011/04/20	NN8-14	11	d3		0	0	0	0	0	0	0	0	0	0	0	0	0	0	0	0	0	0	0	0	0	4.90196078431373	0	0	0	0	0	0	0	0	0	0	0	0	0.980392156862745	0	0	0	0	9.80392156862745	0	0.980392156862745	24.5098039215686	0	0
2011/04/20	NN8-14	11	d4		0	0	0	0	0	0	0	0	0	0	0	0	0	0	0	0	0	0	0	0	0	4.95049504950495	0	0	0	0	0	0	0	0	0	0	0	0	0.99009900990099	0	0	0	0	4.95049504950495	0	0	39.6039603960396	0	0
2011/04/20	NN8-14	12	d1		0	0	0	0	0	0	0	0	0	0	0	0	0	0	2.88461538461538	0	0	0	0	0	0	0	0	0	0	0	0	0	0	0	0	0	0	0	0.961538461538462	0	0	0	0	4.80769230769231	0	2.88461538461538	24.0384615384615	0	0
2011/04/20	NN8-14	12	d2		0	0	0	0	0	0	0	0	0	0	0	0	0	0	0	0	0	0	0	0	0	0	0	0	0	0	0	0	0	0	0	0	0	0	0.980392156862745	0	0	0	0	14.7058823529412	0	0	34.3137254901961	0	0
2011/04/20	NN8-14	12	d3		0	0	0	0	0	0	0	0	0	0	0	0	0	0	0	0	0	0	0	0	0	0	0	0	0	0	0	0	0	0	0	0	0	0	2.9126213592233	0	0	0	0	14.5631067961165	0	0	29.126213592233	0	0
2011/04/20	NN8-14	12	d4		0	0	0	0	0	0	0	0	0	0	2.9126213592233	0	0	0	0	0	0	0	0	0	0	0	0	1.94174757281553	0	0	0	0	0	0	0	0	0	0	2.9126213592233	0	0	0	0	4.85436893203883	0	0	33.9805825242718	0	0
2011/04/22	NN8-14	13	d1		0	0	0	0	0	0	0	0	0	2.77777777777778	2.77777777777778	0	0	0	2.77777777777778	0	0	0	0	0	0	0	0	2.77777777777778	0	0	0	0	0	0	0	0	0	1.85185185185185	4.62962962962963	0	0	0	0	4.62962962962963	0	0	46.2962962962963	0	0
2011/04/22	NN8-14	13	d2		0	0	0	0	0	0	0	0	0	0	0	0	0	0	0	0	2.12765957446809	0	0	0	0	0	0	0	0	0	0	0	0	0	0	0	0	0	7.4468085106383	0	0	0	0	5.31914893617021	0	0	42.5531914893617	0	0
2011/04/22	NN8-14	13	d3		4.58715596330275	0	0	0	0	0	0	0	0	0	0	0	0	0	0	0	0	0	0	0	0	0	0	2.75229357798165	0	0	0	0	0	0	0	0	0	2.75229357798165	4.58715596330275	0	0	0	0	4.58715596330275	0	0	32.1100917431193	0	0
2011/04/22	NN8-14	13	d4		2.9126213592233	0	0	0	0	0	0	0	0	0	0	0	0	0	0	0	0	0	0	0	0	0	0	0	0	0	0	0	0	0	0	0	0	2.9126213592233	9.70873786407767	0	0	0	0	9.70873786407767	0	0	29.126213592233	0	0
2011/04/22	NN8-14	14	d1		0	0	0	0	0	0	0	0	19.4174757281553	0	2.9126213592233	0	0	0	0	0	0	0	0	0	0	0	0	0	0	0	0	0	0	0	0	0	0	0	4.85436893203883	0	0	0	0	9.70873786407767	0	0	29.126213592233	0	0
2011/04/22	NN8-14	14	d2		0	0	0	0	0	0	0	0	0	0	0	0	0	0	0	0	0	0	0	0	0	0	0	15.3061224489796	0	0	0	0	0	0	0	0	0	20.4081632653061	3.06122448979592	0	0	0	0	5.10204081632653	0	0	35.7142857142857	0	0
2011/04/22	NN8-14	14	d3		0	0	0	0	0	0	0	0	0	0	0	0	0	0	0	0	0	0	0	0	0	0	0	9.43396226415094	0	0	0	0	0	0	0	0	0	28.3018867924528	7.54716981132075	0	0	0	0	4.71698113207547	0	0	28.3018867924528	0	0
2011/04/22	NN8-14	14	d4		0	0	0	0	0	0	0	0	0	0	0	0	0	0	0	0	0	0	0	0	0	0	0	5	0	0	0	0	0	0	0	0	0	20	5	0	0	0	0	5	0	0	30	0	2
2011/04/22	SW	1	d1		0	0	3.03030303030303	0	0	0	0	0	0	0	0	0	0	0	0	0	3.03030303030303	0	0	0	0	0	0	0	0	0	0	0	0	0	0	0	0	0	0	0	0	0	0	5.05050505050505	0	0	5.05050505050505	0	0
2011/04/22	SW	1	d2		0	0	2.9126213592233	0	0	0	0	0	0	0	0	9.70873786407767	0	0	0	0	4.85436893203883	0	0	0	0	0	0	0	0	0	0	0	0	0	0	0	0	0	0	0	0	0	0	9.70873786407767	0	0	4.85436893203883	0	0
2011/04/22	SW	1	d3		0	0	5.05050505050505	0	0	0	0	0	0	0	0	10.1010101010101	0	3.03030303030303	0	0	3.03030303030303	0	0	0	0	0	0	0	0	0	0	0	0	0	0	0	0	0	0	0	0	0	0	5.05050505050505	0	0	5.05050505050505	0	0
2011/04/22	SW	1	d4		0	0	9.25925925925926	0	0	0	0	0	0	2.77777777777778	0	13.8888888888889	0	2.77777777777778	0	0	2.77777777777778	0	0	0	0	0	0	0	0	0	0	0	0	0	0	0	0	0	0	0	0	0	0	4.62962962962963	0	4.62962962962963	9.25925925925926	0	0
2011/04/22	SW	2	d1		0	0	4.95049504950495	0	0	0	0	0	0	0	0	4.95049504950495	0	0	0	0	4.95049504950495	0	0	0	0	0	0	0	0	0	0	0	0	0	0	0	0	0	0	0	0	0	0	4.95049504950495	0	0	2.97029702970297	0	0
2011/04/22	SW	2	d2		0	0	4.80769230769231	0	0	0	0	0	0	0	0	17.3076923076923	0	0	0	0	2.88461538461538	0	0	0	0	0	0	0	0	0	0	0	0	0	0	0	0	0	0	0	0	0	0	0	0	0	2.88461538461538	0	1.92307692307692
2011/04/22	SW	2	d3		0	0	9.9009900990099	0	0	0	0	0	0	0	0	14.8514851485149	0	0	0	0	2.97029702970297	0	0	0	0	0	0	0	0	0	0	0	0	0	0	0	0	0	0	0	0	0	0	4.95049504950495	0	0	0	0	0
2011/04/22	SW	2	d4		0	0	15	0	0	0	0	0	0	0	0	10	0	0	0	0	5	0	0	0	0	0	0	0	0	0	0	0	0	0	0	0	0	0	0	0	0	0	0	0	0	0	5	0	15
2011/04/22	SW	3	d1		0	0	4.76190476190476	0	0	0	0	0	0	0	0	14.2857142857143	0	2.85714285714286	0	0	2.85714285714286	0	0	0	0	0	0	0	0	0	0	0	0	0	0	0	0	0	2.85714285714286	0	0	0	0	2.85714285714286	0	0	2.85714285714286	0	0
2011/04/22	SW	3	d2		0	0	2.83018867924528	0	0	0	0	0	0	2.83018867924528	0	9.43396226415094	0	1.88679245283019	0	0	2.83018867924528	0	0	0	0	0	0	0	0	0	0	0	0	0	0	0	0	0	4.71698113207547	0	0	0	0	4.71698113207547	0	0	0	0	0
2011/04/22	SW	3	d3		0	0	9.9009900990099	0	0	0	0	0	0	0	0	0	0	2.97029702970297	0	0	2.97029702970297	0	0	0	0	0	0	0	0	0	0	0	0	0	0	0	0	0	9.9009900990099	0	0	0	0	4.95049504950495	0	0	0	0	0
2011/04/22	SW	3	d4		0	0	4.80769230769231	0	0	0	0	0	0	0	0	9.61538461538462	0	4.80769230769231	0	0	2.88461538461538	0	0	0	0	0	0	0	0	0	0	0	0	0	0	0	0	0	0	0	0	0	0	0	0	0	14.4230769230769	0	0
2011/04/22	SW	4	d1		0	0	4.31034482758621	0	0	0	0	0	0	0	0	4.31034482758621	0	0	0	0	0	0	0	0	0	0	0	0	0	0	0	0	0	0	0	0	0	0	4.31034482758621	0	0	0	0	4.31034482758621	0	0	8.62068965517241	0	0
2011/04/22	SW	4	d2		0	0	15	0	0	0	0	0	0	0	0	0	0	2	0	0	0	0	0	0	0	0	0	0	0	0	0	0	0	0	0	0	0	0	15	0	0	0	0	5	0	0	5	0	0
2011/04/22	SW	4	d3		0	0	14.018691588785	0	0	0	0	0	0	0	0	0	0	2.80373831775701	0	0	0	0	0	0	0	0	0	0	0	0	0	0	0	0	0	0	0	0	9.34579439252336	0	0	0	0	4.67289719626168	0	0	14.018691588785	0	0
2011/04/22	SW	4	d4		0	0	4.85436893203883	0	0	0	0	0	0	0	0	0	0	0	0	0	0	0	0	0	0	0	0	0	2.9126213592233	0	0	0	0	0	0	0	0	0	4.85436893203883	0	0	0	0	4.85436893203883	0	0	29.126213592233	0	0
2011/04/24	SE	1	d1		0	0	0	0	0	0	0	0	0	0	0	14.5631067961165	0	0	0	0	0	2.9126213592233	0	0	0	0	0	0	0	0	0	0	0	0	0	0	0	0	0	0	0	0	0	9.70873786407767	0	0	0	0	0
2011/04/24	SE	1	d2		0	0	0	0	0	0	0	0	0	0	0	9.09090909090909	0	0	0	0	0	4.54545454545455	0	0	0	0	0	0	0	0	0	18.1818181818182	0	0	0	0	0	0	0	0	0	0	0	4.54545454545455	0	0	0	0	4.54545454545455
2011/04/24	SE	1	d3		0	0	0	0	0	0	0	0	0	0	0	4.80769230769231	0	2.88461538461538	0	0	4.80769230769231	4.80769230769231	0	0	0	0	0	0	0	0	0	0	0	0	0	0	0	0	0	0	0	0	0	4.80769230769231	0	0	4.80769230769231	0	4.80769230769231
2011/04/24	SE	1	d4		0	0	0	0	0	0	0	0	0	0	0	4.23728813559322	0	0	0	0	8.47457627118644	2.54237288135593	0	0	0	0	0	0	0	0	0	0	2.54237288135593	0	0	0	0	0	0	0	0	0	0	2.54237288135593	0	0	8.47457627118644	0	0
2011/04/24	SE	2	d1		0	0	0	0	0	0	0	0	0	0	0	9.34579439252336	0	0	0	0	0	2.80373831775701	0	0	0	0	0	0	0	0	0	0	0	0	0	0	0	0	4.67289719626168	0	0	0	0	0	0	0	4.67289719626168	0	0
2011/04/24	SE	2	d2		0	4.95049504950495	0	0	0	0	0	0	0	0	0	24.7524752475248	0	0	0	0	0	0	0	0	0	0	0	0	0	0	0	0	0	0	0	0	0	0	2.97029702970297	0	0	0	0	0	0	0	0	0	4.95049504950495
2011/04/24	SE	2	d3		0	0	9.70873786407767	0	0	0	0	0	0	0	0	19.4174757281553	0	0	0	0	0	0	0	0	0	0	0	0	0	0	0	0	0	0	0	0	0	0	7.76699029126214	0	0	0	0	4.85436893203883	0	0	0	0	4.85436893203883
2011/04/24	SE	2	d4		0	0	0	0	0	0	0	0	0	0	0	19.4174757281553	0	0	0	0	0	0	0	0	0	0	0	0	0	0	0	0	0	0	0	0	0	0	0	0	0	0	0	0	0	0	2.9126213592233	0	0
2011/04/24	SE	3	d1		0	0	0	0	0	0	0	0	0	0	2.94117647058824	9.80392156862745	4.90196078431373	0	0	0	0	2.94117647058824	0	0	0	0	0	0	0	0	0	0	0	0	0	0	0	0	4.90196078431373	0	0	0	0	4.90196078431373	0	0	9.80392156862745	0	0
2011/04/24	SE	3	d2		0	4.95049504950495	0	0	0	0	0	0	0	0	0	9.9009900990099	4.95049504950495	0	0	0	0	4.95049504950495	0	0	0	0	0	0	0	0	0	0	0	0	0	0	0	0	2.97029702970297	0	0	0	0	4.95049504950495	0	0	4.95049504950495	0	0
2011/04/24	SE	3	d3		0	0	0	0	0	0	0	0	0	0	0	10	0	0	0	0	0	5	0	0	0	0	0	0	0	0	0	0	0	0	0	0	0	0	10	0	0	0	0	0	0	0	10	0	0
2011/04/24	SE	3	d4		0	0	0	0	0	0	0	0	0	0	0	12.8712871287129	2.97029702970297	0	0	0	0	4.95049504950495	0	0	0	0	0	0	0	0	0	0	0	0	0	0	0	0	0	0	0	0	0	0	0	0	4.95049504950495	0	0
2011/04/24	SE	4	d1		0	0	0	0	0	0	0	0	0	0	0	3.06122448979592	2.04081632653061	0	0	0	0	5.10204081632653	0	0	0	0	0	0	0	0	0	0	0	0	0	0	0	0	5.10204081632653	0	0	0	0	5.10204081632653	0	0	5.10204081632653	0	0
2011/04/24	SE	4	d2		0	0	0	0	0	0	0	0	0	0	0	22.7272727272727	0	0	0	0	0	3.40909090909091	0	0	0	0	0	0	0	0	0	0	0	0	0	0	0	0	5.68181818181818	0	0	0	0	0	0	0	11.3636363636364	0	5.68181818181818
2011/04/24	SE	4	d3		0	0	2.67857142857143	0	0	0	0	0	0	0	0	17.8571428571429	4.46428571428571	0	0	0	0	2.67857142857143	0	0	0	0	0	0	0	0	0	0	0	0	0	0	0	0	4.46428571428571	0	0	0	0	0	0	0	13.3928571428571	0	2.67857142857143
2011/04/24	SE	4	d4		0	0	0	0	0	0	0	0	0	0	0	10	10	0	0	0	0	0	0	0	0	0	0	0	0	0	0	0	0	0	0	0	0	0	0	0	0	0	0	0	5	0	0	0	0
2011/04/29	NN1-7	1	d1		0	49.0196078431373	0	0	0	0	0	2.94117647058824	0	2.94117647058824	0	0	0	0	0	0	0	0	0	0	0	0	0	0	2.94117647058824	0	0	0	0	0	0	0	0	0	0	0	0	0	0	4.90196078431373	0	0	4.90196078431373	0	4.90196078431373
2011/04/29	NN1-7	1	d2		4.90196078431373	44.1176470588235	0	0	0	0	0	0	0	0	0	0	0	0	0	0	0	0	0	0	0	0	0	0	2.94117647058824	0	0	0	0	0	0	0	0	0	0	0	0	0	0	4.90196078431373	0	4.90196078431373	2.94117647058824	0	14.7058823529412
2011/04/29	NN1-7	1	d3		0	28.8461538461538	28.8461538461538	0	0	0	0	0	0	2.88461538461538	0	0	0	0	0	0	0	0	0	0	0	0	0	0	0	0	0	0	0	0	0	0	0	0	0	0	0	0	0	9.61538461538462	0	0	0	0	0
2011/04/29	NN1-7	1	d4		0	0	43.6893203883495	0	0	0	0	0	0	0	0	0	0	0	0	0	0	0	0	0	0	0	0	0	0	0	0	0	0	0	0	0	0	0	0	0	0	0	0	9.70873786407767	0	0	0	0	2.9126213592233
2011/04/29	NN1-7	2	d1		0	35.3535353535354	0	0	0	0	0	3.03030303030303	0	0	0	0	0	0	0	0	0	0	0	0	0	0	0	0	0	0	0	0	0	0	0	0	0	3.03030303030303	0	0	0	0	0	0	0	0	5.05050505050505	0	3.03030303030303
2011/04/29	NN1-7	2	d2		0	33.9805825242718	0	0	0	0	0	0	0	0	0	0	0	0	0	0	0	0	0	0	0	0	0	0	2.9126213592233	0	0	0	0	0	0	0	0	0	0	0	0	0	0	4.85436893203883	0	0	9.70873786407767	0	9.70873786407767
2011/04/29	NN1-7	2	d3		0	19.4174757281553	29.126213592233	0	0	0	0	0	0	2.9126213592233	0	0	0	0	0	0	0	0	0	0	0	0	0	0	0	0	0	0	0	0	0	0	0	0	0	0	0	0	0	4.85436893203883	0	0	0	0	4.85436893203883
2011/04/29	NN1-7	2	d4		0	0	45	0	0	0	0	0	0	0	0	0	0	0	0	0	0	0	0	0	0	0	0	0	0	0	0	0	0	0	0	0	0	0	0	0	0	0	0	10	0	0	0	0	0
2011/04/29	NN1-7	3	d1		0	19.4174757281553	0	0	0	0	0	1.94174757281553	0	0	1.94174757281553	0	0	0	0	0	0	0	0	0	0	0	0	0	0	0	0	0	0	0	0	0	0	0	0	0	0	0	0	2.9126213592233	0	0	0	0	0
2011/04/29	NN1-7	3	d2		0	28.3018867924528	0	0	0	0	0	0	0	0	2.83018867924528	0	0	0	0	0	0	0	0	0	0	0	0	0	0	0	0	0	0	0	0	0	0	0	0	0	0	0	0	4.71698113207547	0	0	0	0	4.71698113207547
2011/04/29	NN1-7	3	d3		0	19.4174757281553	19.4174757281553	0	0	0	0	0	0	0	2.9126213592233	0	0	0	0	0	0	0	0	0	0	0	0	0	0	0	0	0	0	0	0	0	0	0	0	0	0	0	0	9.70873786407767	0	0	0	0	4.85436893203883
2011/04/29	NN1-7	3	d4		0	0	35	0	0	0	0	0	0	0	0	0	0	0	0	0	0	0	0	0	0	0	0	0	0	0	0	0	0	0	0	0	0	0	0	0	0	0	0	10	0	0	10	0	0
2011/05/01	NN1-7	4	d1		0	0	0	0	0	0	0	0	0	0	1.96078431372549	0	0	0	4.90196078431373	0	0	0	0	0	0	0	0	0	0	0	0	0	0	0	0	0	0	0	0	0	0	0	0	4.90196078431373	0	0	0	0	0
2011/05/01	NN1-7	4	d2		0	0	0	0	0	0	0	0	0	0	5	0	0	0	10	0	0	0	0	0	0	0	0	0	0	0	0	0	0	0	0	0	0	0	0	0	0	0	0	5	0	0	0	0	0
2011/05/01	NN1-7	4	d3		0	0	0	0	0	0	0	0	0	0	5	0	0	0	10	0	0	0	0	0	0	0	0	0	0	0	0	0	0	0	0	0	0	0	0	0	0	0	0	5	0	0	0	0	5
2011/05/01	NN1-7	4	d4		0	0	0	0	0	0	0	0	0	0	2.97029702970297	0	0	0	4.95049504950495	0	0	0	0	0	0	0	0	2.97029702970297	0	0	0	0	0	0	0	0	0	0	0	0	0	0	0	4.95049504950495	0	0	14.8514851485149	0	0
2011/05/01	NN1-7	5	d1		0	0	0	0	0	0	0	1.98019801980198	0	0	1.98019801980198	0	0	0	0	0	0	0	0	0	0	0	0	0	0	0	0	0	0	0	0	0	0	0	0	0	0	0	0	4.95049504950495	0	0	0	0	0
2011/05/01	NN1-7	5	d2		0	0	0	0	0	0	0	0	0	0	2.9126213592233	0	0	0	0	0	0	0	0	0	0	0	0	0	0	0	0	0	0	0	0	0	0	0	0	0	0	0	0	9.70873786407767	0	0	0	0	4.85436893203883
2011/05/01	NN1-7	5	d3		0	0	0	0	0	0	0	0	0	0	1.94174757281553	0	0	0	0	0	0	4.85436893203883	0	0	0	0	0	0	0	0	0	0	0	0	0	0	0	0	0	0	0	0	0	4.85436893203883	0	0	4.85436893203883	0	0
2011/05/01	NN1-7	5	d4		0	0	0	0	0	0	0	0	0	0	10.3092783505155	0	0	0	0	0	0	0	0	0	0	0	0	2.06185567010309	0	0	0	0	0	0	0	0	0	0	0	0	0	0	0	5.15463917525773	0	0	15.4639175257732	0	0
2011/05/01	NN1-7	6	d1		0	0	0	0	0	0	0	1.88679245283019	0	0	1.88679245283019	0	0	0	0	0	0	0	0	0	0	0	0	0	0	0	0	0	0	0	0	0	0	0	0	0	0	0	0	9.43396226415094	0	0	4.71698113207547	0	4.71698113207547
2011/05/01	NN1-7	6	d2		0	0	0	0	0	0	0	0	0	0	0	0	0	0	0	0	0	0.961538461538462	0	0	0	0	0	0	0	0	0	0	0	0	0	0	0	0	0	0	0	0	0	4.80769230769231	0	0	0	0	9.61538461538462
2011/05/01	NN1-7	6	d3		0	0	0	0	0	0	0	0	0	0	4.95049504950495	0	0	0	0	0	0	0	0	0	0	0	0	0	0	0	0	0	0	0	0	0	0	0	0	0	0	0	0	4.95049504950495	0	0	4.95049504950495	0	0
2011/05/01	NN1-7	6	d4		0	0	0	0	0	0	0	0	0	0	2.9126213592233	0	0	0	0	0	0	0	0	0	0	0	0	0	0	0	0	0	0	0	0	0	0	0	0	0	0	0	0	4.85436893203883	0	0	33.9805825242718	0	0
2011/05/02	NN1-7	7	d1		0	0	0	0	0	0	0	2.88461538461538	0	2.88461538461538	0	0	38.4615384615385	0	0	0	0	0	0	0	0	0	0	0	0	0	0	0	0	0	0	0	0	0	0	0	0	0	0	4.80769230769231	0	0	9.61538461538462	0	0
2011/05/02	NN1-7	7	d2		0	0	0	0	0	0	0	0	2.97029702970297	0	0	0	59.4059405940594	0	0	0	0	0	0	0	0	0	0	0	0	0	0	0	0	0	0	0	0	0	0	0	0	0	0	2.97029702970297	0	0	4.95049504950495	0	0
2011/05/02	NN1-7	7	d3		0	0	0	0	0	0	0	0	0	0	0	0	38.8349514563107	0	0	0	0	0	0	0	0	0	2.9126213592233	0	0	0	0	0	0	0	0	0	0	0	0	0	0	0	0	0	0	0	9.70873786407767	0	0
2011/05/02	NN1-7	7	d4		0	0	0	0	0	0	0	0	0	0	0	0	4.62962962962963	0	0	0	0	4.62962962962963	0	0	0	0	2.77777777777778	0	0	0	0	0	0	0	0	0	0	0	0	0	0	0	0	13.8888888888889	0	0	18.5185185185185	0	0
2011/05/02	NN8-14	8	d1		0	0	0	0	0	0	0	2.9126213592233	0	0	0	0	9.70873786407767	0	0	0	0	0	0	0	0	4.85436893203883	0	0	0	0	0	0	0	0	0	0	0	0	0	0	0	0	0	0	0	0	14.5631067961165	0	0
2011/05/02	NN8-14	8	d2		0	0	0	0	0	0	0	0	0	0	0	0	9.80392156862745	0	0	0	0	0	0	0	0	1.96078431372549	0	0	0	0	0	0	0	0	0	0	0	0	0	0	0	0	0	4.90196078431373	0	0	29.4117647058824	0	0
2011/05/02	NN8-14	8	d3		0	0	0	0	0	0	0	0	0	2.9126213592233	0	0	4.85436893203883	0	0	0	0	0	0	0	0	0	0	0	0	0	0	0	0	0	0	0	0	0	0	0	0	0	0	4.85436893203883	0	0	14.5631067961165	0	4.85436893203883
2011/05/02	NN8-14	8	d4		0	0	0	0	0	0	0	0	0	0	0	0	0	0	0	0	0	10	0	0	0	0	0	0	0	0	0	0	0	0	0	0	0	0	0	0	0	0	0	10	0	0	40	0	0
2011/05/03	NN8-14	9	d1		0	0	0	0	0	0	0	0	0	0	1.98019801980198	0	0	0	0	0	0	0	0	0	0	0	0	0	0	0	0	0	0	0	0	0	0	0	2.97029702970297	0	0	0	0	4.95049504950495	0	0	24.7524752475248	0	0
2011/05/03	NN8-14	9	d2		0	0	0	0	0	0	0	0	0	0	0	0	0	0	0	0	0	0	0	0	0	0	0	0	0	0	0	0	0	0	0	0	0	0	2.80373831775701	0	0	0	0	4.67289719626168	0	0	23.3644859813084	0	4.67289719626168
2011/05/03	NN8-14	9	d3		0	0	0	0	0	0	0	0	0	0	2.97029702970297	0	0	0	0	0	0	0	0	0	0	0	0	0	0	0	0	0	0	0	0	0	0	0	2.97029702970297	0	0	0	0	0	0	9.9009900990099	24.7524752475248	0	0
2011/05/03	NN8-14	9	d4		0	0	0	0	0	0	0	0	0	0	5	0	0	0	0	0	0	0	0	0	0	0	0	0	0	0	0	0	0	0	0	0	0	0	0	0	0	0	0	15	0	0	25	0	0
2011/05/03	NN8-14	10	d1		0	0	0	0	0	0	0	0	0	0	0	0	0	0	2.88461538461538	0	0	0	0	0	0	0	0	0	0	0	0	0	0	0	0	0	0	0	1.92307692307692	0	0	0	0	9.61538461538462	0	0	38.4615384615385	0	0
2011/05/03	NN8-14	10	d2		0	0	0	0	0	0	0	0	0	0	0.970873786407767	0	0	0	0	0	0	0	0	0	0	0	0	0	0	0	0	0	0	0	0	0	0	0	0.970873786407767	0	0	0	0	4.85436893203883	0	0	43.6893203883495	0	0
2011/05/03	NN8-14	10	d3		0	0	0	0	0	0	0	0	0	0	1.94174757281553	0	0	0	0	0	0	0	0	0	0	0	0	0	0	0	0	0	0	0	0	0	0	0	0	0	0	0	0	9.70873786407767	0	0	29.126213592233	0	0
2011/05/03	NN8-14	10	d4		0	0	0	0	0	0	0	0	0	0	2	0	0	0	0	0	0	0	0	0	0	0	0	0	0	0	0	0	0	0	0	0	0	0	0	0	0	0	0	15	0	0	30	0	0
2011/05/03	NN8-14	11	d1		0	0	0	0	0	0	0	0	0	0	0	0	0	0	0	0	0	0	0	0	0	0	0	0	0	0	0	0	0	0	0	0	0	0	0.961538461538462	0	0	0	0	14.4230769230769	0	0	33.6538461538462	0	0
2011/05/03	NN8-14	11	d2		0	0	0	0	0	0	0	0	0	0	0	0	0	0	0	0	0	0	0	0	0	0	0	0	0	0	0	0	0	0	0	0	0	0	2.97029702970297	0	0	0	0	9.9009900990099	0	0	54.4554455445545	0	0
2011/05/03	NN8-14	11	d3		0	0	0	0	0	0	0	0	0	0	0	0	0	0	0	0	0	0	0	0	0	5	0	0	0	0	0	0	0	0	0	0	0	0	0	0	0	0	0	10	0	5	45	0	0
2011/05/03	NN8-14	11	d4		0	0	0	0	0	0	0	0	0	0	0.970873786407767	0	0	0	0	0	0	0	0	0	0	4.85436893203883	0	0	0	0	0	0	0	0	0	0	0	0	1.94174757281553	0	0	0	0	9.70873786407767	0	0	43.6893203883495	0	0
2011/05/03	NN8-14	12	d1		0	0	0	0	0	0	0	0	0	0	0	0	0	0	1.98019801980198	0	0	0	0	0	0	0	0	0	0	0	0	0	0	0	0	0	0	0	0.99009900990099	0	0	0	0	9.9009900990099	0	4.95049504950495	34.6534653465347	0	0
2011/05/03	NN8-14	12	d2		0	0	0	0	0	0	0	0	0	0	0	0	0	0	0	0	0	0	0	0	0	0	0	0	0	0	0	0	0	0	0	0	0	0	0	0	0	0	0	5.68181818181818	0	0	51.1363636363636	0	0
2011/05/03	NN8-14	12	d3		0	0	0	0	0	0	0	0	0	0	2.04081632653061	0	0	0	0	0	0	0	0	0	0	0	0	0	0	0	0	0	0	0	0	0	0	0	1.02040816326531	0	0	0	0	10.2040816326531	0	0	45.9183673469388	0	0
2011/05/03	NN8-14	12	d4		0	0	0	0	0	0	0	0	0	0	2.88461538461538	0	0	0	0	0	0	0	0	0	0	0	0	0	0	0	0	0	0	0	0	0	0	0	0.961538461538462	0	0	0	0	14.4230769230769	0	0	43.2692307692308	0	0
2011/05/05	NN8-14	13	d1		0	0	0	0	0	0	0	0	0	0	2	0	0	0	2	0	0	0	0	0	0	0	0	0	0	0	0	0	0	0	0	0	0	0	5	0	0	0	0	5	0	0	65	0	0
2011/05/05	NN8-14	13	d2		0	0	0	0	0	0	0	0	0	0	0	0	0	0	0	0	1.8348623853211	0	0	0	0	0	0	0	0	0	0	0	0	0	0	0	0	0	6.42201834862385	0	0	0	0	9.1743119266055	0	0	64.2201834862385	0	0
2011/05/05	NN8-14	13	d3		4.90196078431373	0	0	0	0	0	0	0	0	0	0.980392156862745	0	0	0	0	0	0	0	0	0	0	0	0	0	0	0	0	0	0	0	0	0	0	0	7.84313725490196	0	0	0	0	4.90196078431373	0	0	49.0196078431373	0	0
2011/05/05	NN8-14	13	d4		4.85436893203883	0	0	0	0	0	0	0	0	0	0	0	0	0	0	0	0	0	0	0	0	0	0	0	0	0	0	0	0	0	0	0	0	0	4.85436893203883	0	0	0	0	4.85436893203883	0	0	58.252427184466	0	0
2011/05/05	NN8-14	14	d1		0	0	0	0	0	0	0	0	14.7058823529412	0	1.96078431372549	0	0	0	0	0	0	0	0	0	0	0	0	0	0	0	0	0	0	0	0	0	0	0	4.90196078431373	0	0	0	0	14.7058823529412	0	0	39.2156862745098	0	0
2011/05/05	NN8-14	14	d2		0	0	0	0	0	0	0	0	19.4174757281553	0	2.9126213592233	0	0	0	0	0	0	0	0	0	0	0	0	0	0	0	0	0	0	0	0	0	0	0	4.85436893203883	0	0	0	0	9.70873786407767	0	0	48.5436893203884	0	0
2011/05/05	NN8-14	14	d3		0	0	0	0	0	0	0	0	35	0	0	0	0	0	0	0	0	0	0	0	0	0	0	0	0	0	0	0	0	0	0	0	0	0	10	0	0	0	0	10	0	0	35	0	0
2011/05/05	NN8-14	14	d4		0	0	0	0	0	0	0	0	19.047619047619	0	0	0	0	0	0	0	0	0	0	0	0	0	0	0	0	0	0	0	0	0	0	0	0	0	4.76190476190476	0	0	0	0	9.52380952380952	0	0	47.6190476190476	0	0
2011/05/05	SW	1	d1		0	0	4.71698113207547	0	0	0	0	0	0	0	0	0	0	0	0	0	0	0	2.83018867924528	0	0	0	0	0	0	0	0	0	0	0	0	0	0	0	0	0	0	0	0	4.71698113207547	0	0	28.3018867924528	0	0
2011/05/05	SW	1	d2		0	0	4.76190476190476	0	0	0	0	0	0	0	0	9.52380952380952	0	0	0	0	0	0	0	0	0	0	0	0	0	0	0	0	0	0	0	0	0	0	0	0	0	0	0	4.76190476190476	0	0	28.5714285714286	0	0
2011/05/05	SW	1	d3		0	0	10.3092783505155	0	0	0	0	0	0	0	0	5.15463917525773	0	5.15463917525773	0	0	0	0	0	0	0	0	0	0	0	0	0	0	0	0	0	0	0	0	0	0	0	0	0	10.3092783505155	0	0	10.3092783505155	0	0
2011/05/05	SW	1	d4		0	0	9.52380952380952	0	0	0	0	0	0	0	0	14.2857142857143	0	0	0	0	0	0	2.85714285714286	0	0	0	0	0	0	0	0	0	0	0	0	0	0	0	0	0	0	0	0	4.76190476190476	0	4.76190476190476	33.3333333333333	0	0
2011/05/05	SW	2	d1		0	0	9.9009900990099	0	0	0	0	0	0	0	0	4.95049504950495	0	2.97029702970297	0	0	4.95049504950495	0	0	0	0	0	0	0	0	0	0	0	0	0	0	0	0	0	0	0	0	0	0	0	0	0	9.9009900990099	0	0
2011/05/05	SW	2	d2		0	0	10.4166666666667	0	0	0	0	0	0	0	0	13.5416666666667	0	0	0	0	3.125	0	3.125	0	0	0	0	0	0	0	0	0	0	0	0	0	0	0	0	0	0	0	0	5.20833333333333	0	0	15.625	0	0
2011/05/05	SW	2	d3		0	0	14.1509433962264	0	0	0	0	0	0	0	0	14.1509433962264	0	0	0	0	4.71698113207547	0	2.83018867924528	0	0	0	0	0	0	0	0	0	0	0	0	0	0	0	0	0	0	0	0	4.71698113207547	0	0	4.71698113207547	0	0
2011/05/05	SW	2	d4		0	0	15	0	0	0	0	0	0	0	0	20	0	0	0	0	5	0	0	0	0	0	0	0	0	0	0	0	0	0	0	0	0	0	0	0	0	0	0	5	0	0	10	0	15
2011/05/06	SW	3	d1		0	0	4.80769230769231	0	0	0	0	0	0	0	0	14.4230769230769	0	2.88461538461538	0	0	4.80769230769231	0	0	0	0	0	0	0	0	0	0	0	0	0	0	0	0	0	2.88461538461538	0	0	0	0	4.80769230769231	0	0	14.4230769230769	0	0
2011/05/06	SW	3	d2		0	0	2.83018867924528	0	0	0	0	0	0	0	0	9.43396226415094	0	2.83018867924528	0	0	4.71698113207547	0	1.88679245283019	0	0	0	0	0	0	0	0	0	0	0	0	0	0	0	2.83018867924528	0	0	0	0	4.71698113207547	0	0	4.71698113207547	0	0
2011/05/06	SW	3	d3		0	0	4.5045045045045	0	0	0	0	0	0	0	0	2.7027027027027	0	2.7027027027027	0	0	2.7027027027027	0	2.7027027027027	0	0	0	0	0	0	0	0	0	0	0	0	0	0	0	4.5045045045045	0	0	0	0	9.00900900900901	0	0	9.00900900900901	0	0
2011/05/06	SW	3	d4		0	0	4.80769230769231	0	0	0	0	0	0	0	0	14.4230769230769	0	9.61538461538462	0	0	2.88461538461538	0	0	0	0	0	0	0	0	0	0	0	0	0	0	0	0	0	0	0	0	0	0	4.80769230769231	0	0	28.8461538461538	0	0
2011/05/06	SW	4	d1		0	0	4.46428571428571	0	0	0	0	0	0	0	0	1.78571428571429	0	1.78571428571429	0	0	0	0	2.67857142857143	0	0	0	0	0	0	0	0	0	0	0	0	0	0	0	4.46428571428571	0	0	0	0	4.46428571428571	0	0	17.8571428571429	0	0
2011/05/06	SW	4	d2		0	0	9.70873786407767	0	0	0	0	0	0	0	0	0	0	2.9126213592233	0	0	0	0	1.94174757281553	0	0	0	0	0	0	0	0	0	0	0	0	0	0	0	6.79611650485437	0	0	0	0	4.85436893203883	0	0	9.70873786407767	0	0
2011/05/06	SW	4	d3		0	0	15.7894736842105	0	0	0	0	0	0	0	0	0	0	5.26315789473684	0	0	0	0	2.10526315789474	0	0	0	0	0	0	0	0	0	0	0	0	0	0	0	5.26315789473684	0	0	0	0	10.5263157894737	0	0	21.0526315789474	0	0
2011/05/06	SW	4	d4		0	0	5.49450549450549	0	0	0	0	0	0	0	0	0	0	3.2967032967033	0	0	0	0	3.2967032967033	0	0	0	0	0	0	0	0	0	0	0	0	0	0	0	5.49450549450549	0	0	0	0	10.989010989011	0	0	32.967032967033	0	0
2011/05/06	SE	1	d1		0	0	0	0	0	0	0	0	0	0	0	15	0	0	0	0	0	5	0	0	0	0	0	0	0	0	0	0	0	0	0	0	0	0	0	0	0	0	0	10	0	0	0	0	0
2011/05/06	SE	1	d2		0	0	0	0	0	0	0	0	0	0	0	2.83018867924528	0	0	0	0	0	4.71698113207547	0	0	0	0	0	0	0	0	0	28.3018867924528	0	0	0	0	0	0	0	0	0	0	0	4.71698113207547	0	0	0	0	4.71698113207547
2011/05/06	SE	1	d3		0	0	0	0	0	0	0	0	0	0	0	9.25925925925926	0	2.77777777777778	0	0	4.62962962962963	4.62962962962963	0	0	0	0	0	0	0	0	0	0	0	0	0	0	0	0	0	0	0	0	0	9.25925925925926	0	0	9.25925925925926	0	4.62962962962963
2011/05/06	SE	1	d4		0	0	0	0	0	0	0	0	0	0	0	4.85436893203883	0	0	0	0	4.85436893203883	4.85436893203883	0	0	0	0	0	0	0	0	0	0	2.9126213592233	0	0	0	0	0	0	0	0	0	0	0	0	0	19.4174757281553	0	0
2011/05/06	SE	2	d1		0	0	0	0	0	0	0	0	0	0	0	14.8514851485149	0	0	0	0	0	2.97029702970297	0	0	0	0	0	0	0	0	0	0	0	0	0	0	0	0	4.95049504950495	0	0	0	0	4.95049504950495	0	0	4.95049504950495	0	0
2011/05/06	SE	2	d2		0	4.71698113207547	0	0	0	0	0	0	0	0	0	18.8679245283019	0	0	0	0	0	0	2.83018867924528	0	0	0	0	0	0	0	0	0	0	0	0	0	0	0	2.83018867924528	0	0	0	0	4.71698113207547	0	0	0	0	4.71698113207547
2011/05/06	SE	2	d3		0	0	9.00900900900901	0	0	0	0	0	0	0	0	18.018018018018	0	0	0	0	0	0	0	0	0	0	0	0	0	0	0	0	0	0	0	0	0	0	2.7027027027027	0	0	0	0	4.5045045045045	0	0	2.7027027027027	0	4.5045045045045
2011/05/06	SE	2	d4		0	0	0	0	0	0	0	0	0	0	0	20	0	0	0	0	0	0	0	0	0	0	0	0	0	0	0	0	0	0	0	0	0	0	0	0	0	0	0	0	0	0	0	0	0
2011/05/06	SE	3	d1		0	0	0	0	0	0	0	0	0	0	0	15	0	0	0	0	0	5	0	0	0	0	0	0	0	0	0	0	0	0	0	0	0	0	0	0	0	0	0	10	0	0	10	0	5
2011/05/06	SE	3	d2		0	9.70873786407767	0	0	0	0	0	0	0	0	0	9.70873786407767	4.85436893203883	0	0	0	0	4.85436893203883	0	0	0	0	0	0	0	0	0	0	0	0	0	0	0	0	2.9126213592233	0	0	0	0	4.85436893203883	0	0	4.85436893203883	0	0
2011/05/06	SE	3	d3		0	0	5	0	0	0	0	0	0	0	0	10	0	0	0	0	0	5	0	0	0	0	0	0	0	0	0	0	0	0	0	0	0	0	10	0	0	0	0	0	0	0	10	0	0
2011/05/06	SE	3	d4		0	0	0	0	0	0	0	0	0	0	0	14.5631067961165	2.9126213592233	0	0	0	0	4.85436893203883	0	0	0	0	0	0	0	0	0	0	0	0	0	0	0	0	0	0	0	0	0	0	0	0	4.85436893203883	0	0
2011/05/06	SE	4	d1		0	0	0	0	0	0	0	0	0	0	0	10.2040816326531	5.10204081632653	0	0	0	0	5.10204081632653	0	0	0	0	0	0	0	0	0	0	0	0	0	0	0	0	3.06122448979592	0	0	0	0	10.2040816326531	0	0	10.2040816326531	0	0
2011/05/06	SE	4	d2		0	0	0	0	0	0	0	0	0	0	0	20	0	0	0	0	0	5	0	0	0	0	0	0	0	0	0	0	0	0	0	0	0	0	0	0	0	0	0	5	0	0	10	0	0
2011/05/06	SE	4	d3		0	0	4.85436893203883	0	0	0	0	0	0	0	0	19.4174757281553	2.9126213592233	0	0	0	0	4.85436893203883	0	0	0	0	0	0	0	0	0	0	0	0	0	0	0	0	4.85436893203883	0	0	0	0	0	0	0	19.4174757281553	0	0
2011/05/06	SE	4	d4		0	0	0	0	0	0	0	0	0	0	0	9.70873786407767	9.70873786407767	0	0	0	0	4.85436893203883	0	0	0	0	0	0	0	0	0	0	0	0	0	0	0	0	0	0	0	0	0	4.85436893203883	0	0	9.70873786407767	0	0
2011/05/10	NN1-7	1	d1		2.97029702970297	44.5544554455446	0	0	0	0	0	2.97029702970297	0	0	0	0	0	0	0	0	0	0	0	0	0	0	0	0	0	0	0	0	0	0	0	0	0	0	0	0	0	0	0	9.9009900990099	0	0	4.95049504950495	0	4.95049504950495
2011/05/10	NN1-7	1	d2		2.9126213592233	38.8349514563107	0	0	0	0	0	0	0	0	0	0	0	0	0	0	0	0	0	0	0	0	0	0	0	0	0	0	0	0	0	0	0	0	0	0	0	0	0	9.70873786407767	0	0	4.85436893203883	0	14.5631067961165
2011/05/10	NN1-7	1	d3		0	29.126213592233	33.9805825242718	0	0	0	0	0	0	0	0	0	0	0	0	0	0	0	0	0	0	0	0	0	0	0	0	0	0	0	0	0	0	0	0	0	0	0	0	9.70873786407767	0	0	4.85436893203883	0	0
2011/05/10	NN1-7	1	d4		2.06185567010309	0	36.0824742268041	0	0	0	0	0	0	0	0	0	0	0	0	0	0	0	0	0	0	0	0	0	0	0	0	0	0	0	0	0	0	0	0	0	0	0	0	10.3092783505155	0	0	0	0	0
2011/05/10	NN1-7	2	d1		0	23.8095238095238	0	0	0	0	0	1.9047619047619	0	0	0	0	0	0	0	0	0	0	0	0	0	0	0	0	0	0	0	0	0	0	0	0	0	0	0	0	0	0	0	9.52380952380952	0	0	4.76190476190476	0	2.85714285714286
2011/05/10	NN1-7	2	d2		0	35	0	0	0	0	0	0	0	0	0	0	0	0	0	0	0	0	0	0	0	0	0	0	0	0	0	0	0	0	0	0	0	0	0	0	0	0	0	0	0	0	10	0	10
2011/05/10	NN1-7	2	d3		0	14.5631067961165	24.2718446601942	0	0	0	0	0	0	2.9126213592233	0	0	0	0	0	0	0	0	0	0	0	0	0	0	0	0	0	0	0	0	0	0	0	0	0	0	0	0	0	4.85436893203883	0	0	0	0	4.85436893203883
2011/05/10	NN1-7	2	d4		2.9126213592233	0	33.9805825242718	0	0	0	0	0	0	0	0	0	0	0	0	0	0	0	0	0	0	0	0	0	0	0	0	0	0	0	0	0	0	0	0	0	0	0	0	9.70873786407767	0	0	0	0	0
2011/05/10	NN1-7	3	d1		0	19.2307692307692	0	0	0	0	0	1.92307692307692	0	0	1.92307692307692	0	0	0	0	0	0	0	0	0	0	0	0	0	0	0	0	0	0	0	0	0	0	0	0	0	0	0	0	9.61538461538462	0	0	0	0	0
2011/05/10	NN1-7	3	d2		0	19.6078431372549	0	0	0	0	0	0	0	0	1.96078431372549	0	0	0	0	0	0	0	0	0	0	0	0	0	0	0	0	0	0	0	0	0	0	0	0	0	0	0	0	4.90196078431373	0	0	4.90196078431373	0	4.90196078431373
2011/05/10	NN1-7	3	d3		0	9.34579439252336	18.6915887850467	0	0	0	0	0	0	0	1.86915887850467	0	0	0	0	0	0	0	0	0	0	0	0	0	0	0	0	0	0	0	0	0	0	0	0	0	0	0	0	9.34579439252336	0	0	0	0	4.67289719626168
2011/05/10	NN1-7	3	d4		0	0	29.7029702970297	0	0	0	0	0	0	0	0.99009900990099	0	0	0	0	0	0	0	0	0	0	0	0	0	0	0	0	0	0	0	0	0	0	0	0	0	0	0	0	14.8514851485149	0	0	4.95049504950495	0	9.9009900990099
2011/05/10	NN1-7	4	d1		0	0	0	0	0	0	0	2.02020202020202	0	0	0	0	0	0	10.1010101010101	0	0	2.02020202020202	0	0	0	0	0	0	0	0	0	0	0	0	0	0	0	0	0	0	0	0	0	10.1010101010101	0	0	0	0	0
2011/05/10	NN1-7	4	d2		0	0	0	0	0	0	0	0	0	0	2.9126213592233	0	0	0	14.5631067961165	0	0	4.85436893203883	0	0	0	0	0	0	0	0	0	0	0	0	0	0	0	0	0	0	0	0	0	9.70873786407767	0	0	0	0	0
2011/05/10	NN1-7	4	d3		0	0	0	0	0	0	0	0	0	0	4.95049504950495	0	0	0	14.8514851485149	0	0	2.97029702970297	0	0	0	0	0	0	0	0	0	0	0	0	0	0	0	0	0	0	0	0	0	4.95049504950495	0	0	0	0	2.97029702970297
2011/05/10	NN1-7	4	d4		0	0	0	0	0	0	0	0	0	0	4.85436893203883	0	0	0	9.70873786407767	0	0	2.9126213592233	0	0	0	0	0	0	0	0	0	0	0	0	0	0	0	0	0	0	0	0	0	14.5631067961165	0	0	9.70873786407767	0	0
2011/05/15	NN1-7	5	d1		0	0	0	0	0	0	0	1.92307692307692	0	0	4.80769230769231	0	0	0	0	0	0	0	0	0	0	0	0	0	0	0	0	0	0	0	0	0	0	0	0	0	0	0	0	9.61538461538462	0	0	0	0	0
2011/05/15	NN1-7	5	d2		0	0	0	0	0	0	0	0	0	0	9.80392156862745	0	0	0	0	0	0	4.90196078431373	0	0	0	0	0	0	0	0	0	0	0	0	0	0	0	0	0	0	0	0	0	9.80392156862745	0	0	0	0	9.80392156862745
2011/05/15	NN1-7	5	d3		0	0	0	0	0	0	0	0	0	0	5	0	0	0	0	0	0	10	0	0	0	0	0	0	0	0	0	0	0	0	0	0	0	0	0	0	0	0	0	10	0	0	5	0	0
2011/05/15	NN1-7	5	d4		0	0	0	0	0	0	0	0	0	0	15	0	0	0	0	0	0	5	0	0	0	0	0	0	0	0	0	0	0	0	0	0	0	0	0	0	0	0	0	15	0	0	20	0	0
2011/05/15	NN1-7	6	d1		0	0	0	0	0	0	0	2	0	0	5	0	0	0	0	0	0	0	0	0	0	0	0	0	0	0	0	0	0	0	0	0	0	0	0	0	0	0	0	10	0	0	5	0	0
2011/05/15	NN1-7	6	d2		0	0	0	0	0	0	0	0	0	0	0	0	0	0	0	0	0	0.99009900990099	0	0	0	0	0	0	0	0	0	0	0	0	0	0	0	0	0	0	0	0	0	4.95049504950495	0	0	0	0	9.9009900990099
2011/05/15	NN1-7	6	d3		0	0	0	0	0	0	0	0	0	0	14.7058823529412	0	0	0	0	0	0	1.96078431372549	0	0	0	0	0	0	0	0	0	0	0	0	0	0	0	0	0	0	0	0	0	4.90196078431373	0	0	4.90196078431373	0	0
2011/05/15	NN1-7	6	d4		0	0	0	0	0	0	0	0	0	0	9.9009900990099	0	0	0	0	0	0	0.99009900990099	0	0	0	0	0	0	0	0	0	0	0	0	0	0	0	0	0	0	0	0	0	4.95049504950495	0	0	29.7029702970297	0	0
2011/05/15	NN1-7	7	d1		0	0	0	0	0	0	0	1.92307692307692	0	0	0	0	33.6538461538462	0	0	0	0	0	0	0	0	0	1.92307692307692	0	0	0	0	0	0	0	0	0	0	0	0	0	0	0	0	4.80769230769231	0	0	14.4230769230769	0	0
2011/05/15	NN1-7	7	d2		0	0	0	0	0	0	0	0	0	0	0	0	48.5436893203884	0	0	0	0	0	0	0	0	0	2.9126213592233	0	0	0	0	0	0	0	0	0	0	0	0	0	0	0	0	4.85436893203883	0	0	4.85436893203883	0	0
2011/05/15	NN1-7	7	d3		0	0	0	0	0	0	0	0	0	0	0	0	43.2692307692308	0	0	0	0	2.88461538461538	0	0	0	0	4.80769230769231	0	0	0	0	0	0	0	0	0	0	0	0	0	0	0	0	4.80769230769231	0	0	9.61538461538462	0	2.88461538461538
2011/05/15	NN1-7	7	d4		0	0	0	0	0	0	0	0	0	0	0	0	4.85436893203883	0	0	0	0	9.70873786407767	0	0	0	0	2.9126213592233	0	0	0	0	0	0	0	0	0	0	0	0	0	0	0	0	19.4174757281553	0	0	29.126213592233	0	0
2011/05/15	NN8-14	8	d1		0	0	0	0	0	0	0	1.98019801980198	0	0	1.98019801980198	0	0	0	0	0	0	0	0	0	0	9.9009900990099	0	0	0	0	0	0	0	0	0	0	0	0	0	0	0	0	0	0	0	0	29.7029702970297	0	4.95049504950495
2011/05/15	NN8-14	8	d2		0	0	0	0	0	0	0	0	0	0	0	0	2.9126213592233	0	0	0	0	0	0	0	0	4.85436893203883	0	0	0	0	0	0	0	0	0	0	0	0	0	0	0	0	0	4.85436893203883	0	0	29.126213592233	0	0
2011/05/15	NN8-14	8	d3		0	0	0	0	0	0	0	0	0	0	1.94174757281553	0	2.9126213592233	0	0	0	0	2.9126213592233	0	0	0	0	0	0	0	0	0	0	0	0	0	0	0	0	0	0	0	0	0	0	0	0	24.2718446601942	0	4.85436893203883
2011/05/15	NN8-14	8	d4		0	0	0	0	0	0	0	0	0	0	0	0	0	0	0	0	0	5	0	0	0	0	0	0	0	0	0	0	0	0	0	0	0	0	0	0	0	0	0	25	0	0	40	0	0
2011/05/16	NN8-14	9	d1		0	0	0	0	0	0	0	0.980392156862745	0	0	0.980392156862745	0	0	0	0	0	0	0	0	0	0	0	0	0	0	0	0	0	0	0	0	0	0	0	1.96078431372549	0	0	0	0	4.90196078431373	0	0	49.0196078431373	0	0
2011/05/16	NN8-14	9	d2		0	0	0	0	0	0	0	0	0	0	2.9126213592233	0	0	0	0	0	0	0	0	0	0	0	0	0	0	0	0	0	0	0	0	0	0	0	2.9126213592233	0	0	0	0	4.85436893203883	0	0	38.8349514563107	0	0
2011/05/16	NN8-14	9	d3		0	0	0	0	0	0	0	0	0	0	5	0	0	0	0	0	0	0	0	0	0	0	0	0	0	0	0	0	0	0	0	0	0	0	0	0	0	0	0	10	0	0	35	0	0
2011/05/16	NN8-14	9	d4		0	0	0	0	0	0	0	0	0	0	14.5631067961165	0	0	0	0	0	0	0	0	0	0	0	0	0	0	0	0	0	0	0	0	0	0	0	2.9126213592233	0	0	0	0	14.5631067961165	0	0	29.126213592233	0	0
2011/05/16	NN8-14	10	d1		0	0	0	0	0	0	0	0.961538461538462	0	0	0	0	0	0	0	0	0	0	0	0	0	0	0	0	0	0	0	0	0	0	0	0	0	0	0	0	0	0	0	9.61538461538462	0	0	57.6923076923077	0	0
2011/05/16	NN8-14	10	d2		0	0	0	0	0	0	0	0	0	0	1.03092783505155	0	0	0	0	0	0	0	0	0	0	0	0	0	0	0	0	0	0	0	0	0	0	0	0	0	0	0	0	10.3092783505155	0	0	61.8556701030928	0	0
2011/05/16	NN8-14	10	d3		0	0	0	0	0	0	0	0	0	0	4.95049504950495	0	0	0	0	0	0	0	0	0	0	0	0	0	0	0	0	0	0	0	0	0	0	0	0	0	0	0	0	14.8514851485149	0	0	39.6039603960396	0	0
2011/05/16	NN8-14	10	d4		0	0	0	0	0	0	0	0	0	0	4.90196078431373	0	0	0	0	0	0	0	0	0	0	1.96078431372549	0	0	0	0	0	0	0	0	0	0	0	0	0	0	0	0	0	9.80392156862745	0	0	29.4117647058824	0	0
2011/05/16	NN8-14	11	d1		0	0	0	0	0	0	0	0	0	0	0	0	0	0	0	0	0	0	0	0	0	0	0	0	0	0	0	0	0	0	0	0	0	0	0	0	0	0	0	14.1509433962264	0	0	33.0188679245283	0	0
2011/05/16	NN8-14	11	d2		0	0	0	0	0	0	0	0	0	0	0	0	0	0	0	0	0	0	0	0	0	0	0	0	0	0	0	0	0	0	0	0	0	0	0	0	0	0	0	15	0	0	60	0	0
2011/05/16	NN8-14	11	d3		0	0	0	0	0	0	0	0	0	0	0	0	0	0	0	0	0	0	0	0	0	4.85436893203883	0	0	0	0	0	0	0	0	0	0	0	0	0	0	0	0	0	9.70873786407767	0	0	53.3980582524272	0	0
2011/05/16	NN8-14	11	d4		0	0	0	0	0	0	0	0	0	0	1	0	0	0	0	0	0	0	0	0	0	3	0	0	0	0	0	0	0	0	0	0	0	0	0	0	0	0	0	15	0	0	40	0	0
2011/05/16	NN8-14	12	d1		0	0	0	0	0	0	0	0	0	0	0.961538461538462	0	0	0	0	0	0	0	0	0	0	0	0	0	0	0	0	0	0	0	0	0	0	0	0	0	0	0	0	9.61538461538462	2.88461538461538	0	48.0769230769231	0	0
2011/05/16	NN8-14	12	d2		0	0	0	0	0	0	0	0	0	0	0	0	0	0	0	0	0	0	0	0	0	0	0	0	0	0	0	0	0	0	0	0	0	0	0	0	0	0	0	14.5631067961165	0	0	48.5436893203884	0	0
2011/05/16	NN8-14	12	d3		0	0	0	0	0	0	0	0	0	0	0.99009900990099	0	0	0	0	0	0	0	0	0	0	0	0	0	0	0	0	0	0	0	0	0	0	0	0	0	0	0	0	9.9009900990099	0	0	59.4059405940594	0	0
2011/05/16	NN8-14	12	d4		0	0	0	0	0	0	0	0	0	0	2.85714285714286	0	0	0	0	0	0	0	0	0	0	0	0	0	0	0	0	0	0	0	0	0	0	0	0	0	0	0	0	14.2857142857143	0	0	52.3809523809524	0	0
2011/05/20	NN8-14	13	d1		4.71698113207547	0	0	0	0	0	0	0	0	0	2.83018867924528	0	0	0	0	0	0	0	0	0	0	0	0	0	0	0	0	0	0	2.83018867924528	0	0	0	0	0	0	0	0	0	9.43396226415094	0	1.88679245283019	61.3207547169811	0	0
2011/05/20	NN8-14	13	d2		2.72727272727273	0	0	0	0	0	0	0	0	0	0	0	0	0	0	0	0	0	0	0	0	0	0	0	0	0	0	0	0	0	0	0	9.09090909090909	0	0	0	0	0	0	18.1818181818182	0	0	54.5454545454545	0	0
2011/05/20	NN8-14	13	d3		9.80392156862745	0	0	0	0	0	0	0	0	0	0.980392156862745	0	0	0	0	0	0	0	0	0	0	0	0	0	0	0	0	0	0	0	0	0	0	0	0	0	0	0	0	0	0	0	68.6274509803922	0	0
2011/05/20	NN8-14	13	d4		4.85436893203883	0	0	0	0	0	0	0	0	0	0	0	0	0	0	0	0	0	0	0	0	0	0	0	0	0	0	0	0	0	0	0	0	0	4.85436893203883	0	0	0	0	14.5631067961165	0	0	58.252427184466	0	0
2011/05/20	NN8-14	14	d1		0	0	0	0	0	0	0	0	0	0	1.96078431372549	0	0	0	0	0	0	0	0	0	0	0	0	0	0	0	0	0	0	0	0	0	0	0	4.90196078431373	0	0	0	0	19.6078431372549	0	0	53.921568627451	0	0
2011/05/20	NN8-14	14	d2		0	0	0	0	0	0	0	0	0	0	0.99009900990099	0	0	0	0	0	0	0	0	0	0	0	0	0	0	0	0	0	0	0	0	0	0	0	2.97029702970297	0	0	0	0	19.8019801980198	0	0	54.4554455445545	0	0.99009900990099
2011/05/20	NN8-14	14	d3		0	0	0	0	0	0	0	0	0	0	0	0	0	0	0	0	0	0	0	0	0	0	0	0	0	0	0	0	0	0	0	0	0	0	12.621359223301	0	0	0	0	29.126213592233	0	0	48.5436893203884	0	0
2011/05/20	NN8-14	14	d4		2.75229357798165	0	0	0	0	0	0	0	0	0	2.75229357798165	0	0	0	0	0	0	0	0	0	0	0	0	0	0	0	0	0	0	0	0	0	2.75229357798165	0	2.75229357798165	0	0	0	0	18.348623853211	0	0	55.045871559633	0	0
2011/05/20	SW	1	d1		0	0	0.980392156862745	0	0	0	0	0	0	0	0	0	0	0	0	0	0	0	1.96078431372549	0	0	0	0	0	0	0	0	0	0	0	0	0	1.96078431372549	0	0	0	0	0	0	9.80392156862745	0	0	39.2156862745098	0	0
2011/05/20	SW	1	d2		0	0	2.85714285714286	0	0	0	0	0	0	0	0	4.76190476190476	0	0	0	0	0	0	0	0	0	0	0	0	0	0	0	0	0	0	0	0	2.85714285714286	0	0	0	0	0	0	9.52380952380952	0	0	52.3809523809524	0	0
2011/05/20	SW	1	d3		0	0	1.9047619047619	0	0	0	0	0	0	0	0	11.4285714285714	0	4.76190476190476	0	0	0	0	0	0	0	0	0	0	0	0	0	0	0	0	0	0	0	0	0	0	0	0	0	9.52380952380952	0	0	38.0952380952381	0	0
2011/05/20	SW	1	d4		0	0	4.62962962962963	0	0	0	0	0	0	0	0	27.7777777777778	0	0	0	0	0.925925925925926	0	1.85185185185185	0	0	0	0	0	0	0	0	0	0	0	0	0	0	0	0	0	0	0	0	9.25925925925926	0	4.62962962962963	27.7777777777778	0	0
2011/05/20	SW	2	d1		0	0	0	0	0	0	0	0	0	0	0	5	0	3	0	0	2	0	5	0	0	0	0	0	0	0	0	0	0	0	0	0	0	0	0	0	0	0	0	10	0	0	10	0	0
2011/05/20	SW	2	d2		0	0	2.9126213592233	0	0	0	0	0	0	0	0	22.3300970873786	0	0	0	0	1.94174757281553	0	2.9126213592233	0	0	0	0	0	0	0	0	0	0	0	0	0	0	0	0	0	0	0	0	9.70873786407767	0	0	29.126213592233	0	0
2011/05/20	SW	2	d3		0	0	5.15463917525773	0	0	0	0	0	0	0	0	15.4639175257732	0	0	0	0	3.09278350515464	0	0	0	0	0	0	0	0	0	0	0	0	0	0	0	0	0	0	0	0	0	0	10.3092783505155	0	0	25.7731958762887	0	0
2011/05/20	SW	2	d4		0	0	6.02409638554217	0	0	0	0	0	0	0	0	36.144578313253	0	0	0	0	3.6144578313253	0	0	0	0	0	0	0	0	0	0	0	0	0	0	0	0	0	0	0	0	0	0	0	0	0	0	0	24.0963855421687
2011/05/20	SW	3	d1		0	0	1.88679245283019	0	0	0	0	0	0	0	0	28.3018867924528	0	2.83018867924528	0	0	2.83018867924528	0	2.83018867924528	0	0	0	0	0	0	0	0	0	0	0	0	0	0	0	0	0	0	0	0	9.43396226415094	0	0	18.8679245283019	0	0
2011/05/20	SW	3	d2		0	0	0	0	0	0	0	0	0	0	0	19.8019801980198	0	1.98019801980198	0	0	2.97029702970297	0	2.97029702970297	0	0	0	0	0	0	0	0	0	0	0	0	0	0	0	0	0	0	0	0	9.9009900990099	0	0	14.8514851485149	0	0
2011/05/20	SW	3	d3		0	0	3.09278350515464	0	0	0	0	0	0	0	0	0	0	5.15463917525773	0	0	0	0	3.09278350515464	0	0	0	0	0	0	0	0	0	0	0	0	0	0	0	5.15463917525773	0	0	0	0	10.3092783505155	0	0	30.9278350515464	0	0
2011/05/20	SW	3	d4		0	0	4.31034482758621	0	0	0	0	0	0	0	0	25.8620689655172	0	12.9310344827586	0	0	2.58620689655172	0	1.72413793103448	0	0	0	0	0	0	0	0	0	0	0	0	0	0	0	0	0	0	0	0	12.9310344827586	0	0	17.2413793103448	0	1.72413793103448
2011/05/20	SW	4	d1		0	0	0	0	0	0	0	0	0	0	0	2.88461538461538	0	0.961538461538462	0	0	0	0	2.88461538461538	0	0	0	0	0	0	0	0	0	0	0	0	0	19.2307692307692	0	0	0	0	0	0	9.61538461538462	0	0	19.2307692307692	0	0
2011/05/20	SW	4	d2		0	0	9.52380952380952	0	0	0	0	0	0	0	0	0	0	2.85714285714286	0	0	0	0	2.85714285714286	0	0	0	0	0	0	0	0	0	0	0	0	0	0	0	9.52380952380952	0	0	0	0	0	0	0	19.047619047619	0	0
2011/05/20	SW	4	d3		0	0	3.26086956521739	0	0	0	0	0	0	0	0	0	0	3.26086956521739	0	0	0	0	5.43478260869565	0	0	0	0	0	0	0	0	0	0	0	0	0	5.43478260869565	0	5.43478260869565	0	0	0	0	0	0	0	32.6086956521739	0	0
2011/05/20	SW	4	d4		0	0	2.77777777777778	0	0	0	0	0	0	0	0	1.85185185185185	0	1.85185185185185	0	0	0	0	2.77777777777778	0	0	0	0	0	0	0	0	0	0	0	0	0	0	0	0	0	0	0	0	0	0	0	27.7777777777778	0	1.85185185185185
2011/05/20	SE	1	d1		0	0	0	0	0	0	0	0	0	0	0	19.6078431372549	0	0	0	0	0	4.90196078431373	0	0	0	0	0	0	0	0	0	0	0	0	0	0	0	0	0	0	0	0	0	4.90196078431373	0	0	1.96078431372549	0	0
2011/05/20	SE	1	d2		0	0	0	0	0	0	0	0	0	0	0	4.95049504950495	0	0	0	0	0	9.9009900990099	0	0	0	0	0	0	0	0	0	0	0	0	0	0	0	0	14.8514851485149	0	0	0	0	4.95049504950495	0	0	0	0	9.9009900990099
2011/05/20	SE	1	d3		0	0	0	0	0	0	0	0	0	0	0	4.95049504950495	0	1.98019801980198	0	0	2.97029702970297	9.9009900990099	0	0	0	0	0	0	0	0	0	0	0	0	0	0	0	0	0	0	0	0	0	9.9009900990099	0	0	4.95049504950495	0	9.9009900990099
2011/05/20	SE	1	d4		0	0	0	0	0	0	0	0	0	0	0	5.05050505050505	0	0	0	0	5.05050505050505	10.1010101010101	0	0	0	0	0	0	0	0	0	0	0	0	0	0	0	0	0	0	0	0	0	0	0	0	20.2020202020202	0	0
2011/05/20	SE	2	d1		0	0	0	0	0	0	0	0	0	0	0	19.4174757281553	0	0	0	0	0	4.85436893203883	1.94174757281553	0	0	0	0	0	0	0	0	0	0	0	0	0	0	0	0	0	0	0	0	9.70873786407767	0	0	4.85436893203883	0	0
2011/05/20	SE	2	d2		0	4.71698113207547	0	0	0	0	0	0	0	0	0	37.7358490566038	0	0	0	0	0	0	1.88679245283019	0	0	0	0	0	0	0	0	0	0	0	0	0	0	0	0	0	0	0	0	0	0	0	0	0	9.43396226415094
2011/05/20	SE	2	d3		0	0	4.42477876106195	0	0	0	0	0	0	0	0	26.5486725663717	0	0	0	0	0	0	1.76991150442478	0	0	0	0	0	0	0	0	0	0	0	0	0	0	0	0	0	0	0	0	0	0	0	4.42477876106195	0	8.84955752212389
2011/05/20	SE	2	d4		0	0	0	0	0	0	0	0	0	0	0	33.6538461538462	0	0	0	0	0	0	0	0	0	0	0	0	0	0	0	0	0	0	0	0	0	0	0	0	0	0	0	0	0	0	1.92307692307692	0	0
2011/05/20	SE	3	d1		0	0	0	0	0	0	0	0	0	0	0	18.018018018018	0	0	0	0	0	4.5045045045045	0	0	0	0	0	0	0	0	0	0	0	0	0	0	0	0	0	0	0	0	0	9.00900900900901	0	0	9.00900900900901	0	4.5045045045045
2011/05/20	SE	3	d2		0	4.90196078431373	0	0	0	0	0	0	0	0	0	19.6078431372549	4.90196078431373	0	0	0	0	4.90196078431373	0	0	0	0	0	0	0	0	0	0	0	0	0	0	0	0	1.96078431372549	0	0	0	0	1.96078431372549	0	0	4.90196078431373	0	0
2011/05/20	SE	3	d3		0	0	0	0	0	0	0	0	0	0	0	22.5225225225225	0	0	0	0	0	4.5045045045045	0	0	0	0	0	0	0	0	0	0	0	0	0	0	0	0	4.5045045045045	0	0	0	0	0	0	0	9.00900900900901	0	0
2011/05/20	SE	3	d4		0	0	0	0	0	0	0	0	0	0	0	19.047619047619	0	0	0	0	0	4.76190476190476	0	0	0	0	0	0	0	0	0	0	0	0	0	0	0	0	0	0	0	0	0	0	0	0	9.52380952380952	0	0
2011/05/20	SE	4	d1		0	0	0	0	0	0	0	0	0	0	0	9.80392156862745	1.96078431372549	0	0	0	0	4.90196078431373	0	0	0	0	0	0	0	0	0	0	0	0	0	0	0	0	0	0	0	0	0	9.80392156862745	0	0	14.7058823529412	0	0
2011/05/20	SE	4	d2		0	0	0	0	0	0	0	0	0	0	0	30	0	0	0	0	0	5	0	0	0	0	0	0	0	0	0	0	0	0	0	0	0	0	0	0	0	0	0	5	0	0	20	0	5
2011/05/20	SE	4	d3		0	0	0	0	0	0	0	0	0	0	0	30.6122448979592	0	0	0	0	0	5.10204081632653	0	0	0	0	0	0	0	0	0	0	0	0	0	0	0	0	0	0	0	0	0	5.10204081632653	0	0	30.6122448979592	0	3.06122448979592
2011/05/20	SE	4	d4		0	0	0	0	0	0	0	0	0	0	0	19.6078431372549	9.80392156862745	0	0	0	0	4.90196078431373	0	0	0	0	0	0	0	0	0	0	0	0	0	0	0	0	0	0	0	0	0	4.90196078431373	0	0	9.80392156862745	0	0
2011/05/31	NN1-7	1	d1		0	0	0	0	0	0	0	2.7027027027027	0	2.7027027027027	0	0	0	0	0	0	0	0	0	0	0	0	0	0	0	0	0	0	0	0	0	2.7027027027027	0	0	0	0	0	0	0	4.5045045045045	0	0	4.5045045045045	0	4.5045045045045
2011/05/31	NN1-7	1	d2		9.25925925925926	0	0	0	0	0	0	0	0	0	0	0	0	0	0	0	0	0	0	0	0	0	0	0	0	0	0	0	0	0	0	0	0	0	0	0	0	0	0	4.62962962962963	0	2.77777777777778	0	0	13.8888888888889
2011/05/31	NN1-7	1	d3		3	0	0	0	0	0	0	0	0	0	0	0	0	0	0	0	0	0	0	0	0	0	0	0	0	0	0	0	0	0	0	0	0	0	0	0	0	0	0	20	0	0	0	0	0
2011/05/31	NN1-7	1	d4		2.88461538461538	0	0	0	0	0	0	0	0	0	0	0	0	0	0	0	0	0	0	0	0	0	0	0	0	0	0	0	0	0	0	0	0	0	0	0	0	0	0	19.2307692307692	0	0	0	0	2.88461538461538
2011/05/31	NN1-7	2	d1		1.05263157894737	0	0	0	0	0	0	1.05263157894737	0	1.05263157894737	0	0	0	0	0	0	0	0	0	0	0	0	0	0	0	0	0	0	0	0	0	5.26315789473684	0	0	0	0	0	0	0	5.26315789473684	0	0	5.26315789473684	0	5.26315789473684
2011/05/31	NN1-7	2	d2		0	0	0	0	0	0	0	0	0	0.900900900900901	0	0	0	0	0	0	0	0	0	0	0	0	0	0	0	0	0	0	0	0	0	0	0	0	0	0	0	0	0	4.5045045045045	0	0	4.5045045045045	0	9.00900900900901
2011/05/31	NN1-7	2	d3		0	0	0	0	0	0	0	0	0	1.01010101010101	0	0	0	0	0	0	0	0	0	0	0	0	0	0	0	0	0	0	0	0	0	0	0	0	0	0	0	0	0	15.1515151515152	0	0	0	0	10.1010101010101
2011/05/31	NN1-7	2	d4		2.72727272727273	0	0	0	0	0	0	0	0	0	0	0	0	0	0	0	0	0	0	0	0	0	0	0	0	0	0	0	0	0	0	0	0	0	0	0	0	0	0	27.2727272727273	2.72727272727273	0	2.72727272727273	0	0
2011/05/31	NN1-7	3	d1		0	0	0	0	0	0	0	0	0	0.943396226415094	0.943396226415094	0	0	0	0	0	0	0	0	0	0	0	0	0	0	0	0	0	0	0	0	0	0	0	0	0	0	0	0	18.8679245283019	4.71698113207547	2.83018867924528	0	0	2.83018867924528
2011/05/31	NN1-7	3	d2		0	0	0	0	0	0	0	0	0	2.65486725663717	2.65486725663717	0	0	0	0	0	0	0	0	0	0	0	0	0	0	0	0	0	0	0	0	2.65486725663717	0	0	0	0	0	0	0	4.42477876106195	0	0	2.65486725663717	0	4.42477876106195
2011/05/31	NN1-7	3	d3		0	0	0	0	0	0	0	0	0	2.88461538461538	4.80769230769231	0	0	2.88461538461538	0	0	0	2.88461538461538	0	0	0	0	0	0	0	0	0	0	0	0	0	0	0	0	0	0	0	0	0	28.8461538461538	0	0	0	0	4.80769230769231
2011/05/31	NN1-7	3	d4		1.98019801980198	0	0	0	0	0	0	0	0	2.97029702970297	0	0	0	0	0	0	0	0	0	0	0	0	0	0	0	0	0	0	0	0	0	0	0	0	0	0	0	0	0	39.6039603960396	2.97029702970297	0	2.97029702970297	0	9.9009900990099
2011/05/31	NN1-7	4	d1		0	0	0	0	0	0	0	0	0	1.8018018018018	0	0	0	0	9.00900900900901	0	0	4.5045045045045	0	0	0	0	0	0	0	0	0	0	0	0	0	0	0	0	0	0	0	0	0	9.00900900900901	0	0	0	0	2.7027027027027
2011/05/31	NN1-7	4	d2		0	0	0	0	0	0	0	0	0	2.75229357798165	4.58715596330275	0	0	0	13.7614678899083	0	0	9.1743119266055	0	0	0	0	0	0	0	0	0	0	0	0	0	0	0	0	0	0	0	0	0	9.1743119266055	0	0	0	0	0
2011/05/31	NN1-7	4	d3		0	0	0	0	0	0	0	0	0	0.970873786407767	4.85436893203883	0	0	0	14.5631067961165	0	0	9.70873786407767	0	0	0	0	0	0	0	0	0	0	0	0	0	2.9126213592233	0	0	0	0	0	0	0	9.70873786407767	0	0	0	0	2.9126213592233
2011/05/31	NN1-7	4	d4		0	0	0	0	0	0	0	0	0	0.961538461538462	4.80769230769231	0	0	0	0	0	0	4.80769230769231	0	0	0	0	0	0	0	0	0	0	0	0	0	0	0	0	0	0	0	0	0	33.6538461538462	0	14.4230769230769	0	0	2.88461538461538
2011/05/31	NN1-7	5	d1		0	0	0	0	0	0	0	0.934579439252336	0	0.934579439252336	4.67289719626168	0	0	0	0	0	0	2.80373831775701	0	0	0	0	0	0	0	0	0	0	0	0	0	0	0	0	0	0	0	0	0	14.018691588785	2.80373831775701	0	2.80373831775701	0	2.80373831775701
2011/05/31	NN1-7	5	d2		2.72727272727273	0	0	0	0	0	0	0	0	0.909090909090909	2.72727272727273	0	0	0	0	0	0	4.54545454545455	0	0	0	0	0	0	0	0	0	0	0	0	0	0	0	0	0	0	0	0	0	13.6363636363636	2.72727272727273	0	0	0	9.09090909090909
2011/05/31	NN1-7	5	d3		0	0	0	0	0	0	0	0	0	2.77777777777778	2.77777777777778	0	0	0	0	0	0	13.8888888888889	0	0	0	0	0	0	0	0.925925925925926	0	0	0	0	0	0	0	0	0	0	0	0	0	13.8888888888889	0	0	2.77777777777778	0	0
2011/05/31	NN1-7	5	d4		0	0	0	0	0	0	0	0	0	1.01010101010101	15.1515151515152	0	0	0	0	0	0	10.1010101010101	0	0	0	0	0	0	0	0	0	0	0	0	0	3.03030303030303	0	0	0	0	0	0	0	15.1515151515152	0	0	15.1515151515152	0	0
2011/05/31	NN1-7	6	d1		0	0	0	0	0	0	0	0.961538461538462	0	0.961538461538462	4.80769230769231	0	0	0	0	0	0	4.80769230769231	0	0	0	0	0	0	0	0	0	0	0	0	0	0	0	0	0	0	0	0	0	19.2307692307692	0	0	9.61538461538462	0	4.80769230769231
2011/05/31	NN1-7	6	d2		0.900900900900901	0	0	0	0	0	0	0	0	0	0	0	0	0	0	0	0	2.7027027027027	0	0	0	0	0	0	0	0	0	0	0	0	0	0	0	0	0	0	0	0	0	4.5045045045045	0	0	2.7027027027027	0	9.00900900900901
2011/05/31	NN1-7	6	d3		0	0	0	0	0	0	0	0	0	2.54237288135593	4.23728813559322	0	0	0	0	0	0	4.23728813559322	0	0	0	0	0	0	0	0	0	0	0	0	0	0	0	0	0	0	0	0	0	8.47457627118644	0	0	8.47457627118644	0	0
2011/05/31	NN1-7	6	d4		0	0	0	0	0	0	0	0	0	2.23880597014925	3.73134328358209	0	0	0	0	0	0	3.73134328358209	0	0	0	0	0	0	0	0	0	0	0	0	0	0	0	0	0	0	0	0	0	22.3880597014925	3.73134328358209	0	22.3880597014925	0	2.23880597014925
2011/05/31	NN1-7	7	d1		0	0	0	0	0	0	0	0.862068965517241	0	0.862068965517241	0	0	34.4827586206897	0	0	0	0	0	0	0	0	0	2.58620689655172	0	0	0	0	0	0	0	0	0	0	0	0	0	0	0	0	4.31034482758621	0	0	12.9310344827586	0	0
2011/05/31	NN1-7	7	d2		0	0	0	0	0	0	0	0	0	0.892857142857143	0	0	53.5714285714286	0	0	0	0	0	0	0	0	0	0	0	0	0	0	0	0	0	0	0	0	0	0	0	0	0	0	0.892857142857143	0	0	4.46428571428571	0	0
2011/05/31	NN1-7	7	d3		0	0	0	0	0	0	0	0	0	2.63157894736842	0	0	35.0877192982456	0	0	0	0	0	0	0	0	0	4.3859649122807	0	0	0	0	0	0	0	0	0	0	0	0	0	0	0	0	2.63157894736842	0	0	8.7719298245614	0	2.63157894736842
2011/05/31	NN1-7	7	d4		0	0	0	0	0	0	0	0	0	0	0	0	20	0	0	0	0	15	0	0	0	0	10	0	0	0	0	0	0	0	0	0	0	0	0	0	0	0	0	15	0	0	20	0	0
2011/05/31	NN8-14	8	d1		0	0	0	0	0	0	0	0	0	0.917431192660551	0	0	0	0	0	0	0	0	0	0	0	36.697247706422	0	0	0	0	0	0	0	0	0	0	0	0	0	0	0	0	0	0	0	0	36.697247706422	0	4.58715596330275
2011/05/31	NN8-14	8	d2		0	0	0	0	0	0	0	0	0	0	0	0	0	0	0	0	0	0	0	0	0	1.78571428571429	0	0	0	0	0	0	0	0	0	0	0	0	0	0	0	0	0	8.92857142857143	0	8.92857142857143	26.7857142857143	0	0
2011/05/31	NN8-14	8	d3		0	0	0	0	0	0	0	0	0	2.77777777777778	0	0	4.62962962962963	0	0	0	0	4.62962962962963	0	0	0	0	0	0	0	0	0	0	0	0	0	0	0	0	0	0	0	0	0	9.25925925925926	0	0	32.4074074074074	0	4.62962962962963
2011/05/31	NN8-14	8	d4		0	0	0	0	0	0	0	0	0	0	0	0	0	0	0	0	0	8.33333333333333	0	0	0	0	0	0	0	0	0	0	0	0	0	0	0	0	0	0	0	0	0	16.6666666666667	20.8333333333333	0	16.6666666666667	0	0
2011/06/01	NN8-14	9	d1		0	0	0	0	0	0	0	0	0	1.85185185185185	0	0	0	0	0	0	0	1.85185185185185	0	0	0	0	0	0	0	0	0	0	0	0	0	0	0	0	0	0	0	0	0	9.25925925925926	0	0	41.6666666666667	0	0
2011/06/01	NN8-14	9	d2		0	0	0	0	0	0	0	0	0	1.94174757281553	0.970873786407767	0	0	0	0	0	0	0	0	0	0	0	0	0	0	0	0	0	0	0	0	0	0	0	2.9126213592233	0	0	0	0	9.70873786407767	0	0	29.126213592233	0	4.85436893203883
2011/06/01	NN8-14	9	d3		0	0	0	0	0	0	0	0	0	0.884955752212389	4.42477876106195	0	0	0	0	0	0	1.76991150442478	0	0	0	0	0	0	0	0	0	0	0	0	0	0	0	0	0	0	0	0	0	22.1238938053097	0	0	13.2743362831858	0	0
2011/06/01	NN8-14	9	d4		0	0	0	0	0	0	0	0	0	0	4.85436893203883	0	0	0	0	0	0	0.970873786407767	0	0	0	0	0	0	0	0	0	0	0	0	0	0	0	0	0	0	0	0	0	19.4174757281553	0	0	19.4174757281553	0	0
2011/06/01	NN8-14	10	d1		0	0	0	0	0	0	0	0	0	1.03092783505155	0	0	0	0	0	0	0	0	0	0	0	0	0	0	0	0	0	0	0	0	0	0	0	0	0	0	0	0	0	20.6185567010309	1.03092783505155	0	46.3917525773196	0	0
2011/06/01	NN8-14	10	d2		0	0	0	0	0	0	0	0	0	0.970873786407767	0	0	0	0	0	0	0	0.970873786407767	0	0	0	0	0	0	0	0	0	0	0	0	0	0	0	0	0	0	0	0	0	19.4174757281553	0	0	38.8349514563107	0	0
2011/06/01	NN8-14	10	d3		0	0	0	0	0	0	0	0	0	0.943396226415094	4.71698113207547	0	0	0	0	0	0	0.943396226415094	0	0	0	0	0	0	0	0	0	0	0	0	0	0	0	0	0	0	0	0	0	18.8679245283019	0	0	37.7358490566038	0	0
2011/06/01	NN8-14	10	d4		0	0	0	0	0	0	0	0	0	0.980392156862745	4.90196078431373	0	0	0	0	0	0	0	0	0	0	0	0	0	0	0	0	0	0	0	0	0	0	0	0	0	0	0	0	19.6078431372549	0	0	29.4117647058824	0	0
2011/06/01	NN8-14	11	d1		0	0	0	0	0	0	0	0	0	4.80769230769231	0	0	0	0	0	0	0	0	0	0	0	0	0	0	0	0	0	0	0	0	0	0	0	0	0	0	0	0	0	24.0384615384615	0	0	19.2307692307692	0	0
2011/06/01	NN8-14	11	d2		0	0	0	0	0	0	0	0	0	1.04166666666667	0	0	0	0	0	0	0	1.04166666666667	0	0	0	0	0	0	0	0	0	0	0	0	0	0	2.08333333333333	0	0	0	0	0	0	31.25	20.8333333333333	0	0	0	0
2011/06/01	NN8-14	11	d3		0	0	0	0	0	0	0	0	0	2.9126213592233	0	0	0	0	0	0	0	0	0	0	0	4.85436893203883	0	0	0	0	0	0	0	0	0	0	0	0	0	0	0	0	0	24.2718446601942	0	0	29.126213592233	0	0
2011/06/01	NN8-14	11	d4		0	0	0	0	0	0	0	0	0	0.925925925925926	0	0	0	0	0	0	0	0	0	0	0	9.25925925925926	0	0	0	0	0	0	0	0	0	0	0	0	0	0	0	0	0	18.5185185185185	0	0	27.7777777777778	0	0
2011/06/01	NN8-14	12	d1		0	0	0	0	0	0	0	0	0	0.943396226415094	0	0	0	0	0	0	0	0	0	0	0	0	0	0	0	0	0	0	0	0	0	0	0	0	0	0	0	0	0	28.3018867924528	0	4.71698113207547	28.3018867924528	0	0
2011/06/01	NN8-14	12	d2		0	0	0	0	0	0	0	0	0	0.943396226415094	0	0	0	0	0	0	0	0	0	0	0	0	0	0	0	0	0	0	0	0	0	0	0	0	0	0	0	0	0	28.3018867924528	0	0	37.7358490566038	0	0
2011/06/01	NN8-14	12	d3		0	0	0	0	0	0	0	0	0	0.99009900990099	0	0	0	0	0	0	0	0	0	0	0	0	0	0	0	0	0	0	0	0	0	0	0	0	0	0	0	0	0	19.8019801980198	0	0	34.6534653465347	0	0
2011/06/01	NN8-14	12	d4		0	0	0	0	0	0	0	0	0	0	5	0	0	0	0	0	0	0	0	0	0	0	0	0	0	0	0	0	0	0	0	0	0	0	0	0	0	0	0	15	5	0	35	0	0
2011/06/01	NN8-14	13	d1		9.43396226415094	0	0	0	0	0	0	0	0	0	4.71698113207547	0	0	0	0	0	0	0	0	0	0	0	0	0	0	0	0	0	0	2.83018867924528	0	0	0	0	2.83018867924528	0	0	0	0	14.1509433962264	0	0	42.4528301886792	0	0
2011/06/01	NN8-14	13	d2		5	0	0	0	0	0	0	0	0	0	0	0	0	0	0	0	0	0	0	0	0	0	0	0	0	0	0	0	0	0	0	0	30	0	5	0	0	0	0	20	0	0	25	0	0
2011/06/01	NN8-14	13	d3		4.90196078431373	0	0	0	0	0	0	0	0	0	1.96078431372549	0	0	0	0	0	0	4.90196078431373	0	0	0	0	0	0	0	0	0	0	0	0	0	0	0	0	9.80392156862745	0	0	0	0	19.6078431372549	0	0	39.2156862745098	0	0
2011/06/01	NN8-14	13	d4		14.8514851485149	0	0	0	0	0	0	0	0	0.99009900990099	0	0	0	0	0	0	0	0	0	0	0	0	0	0	0	0	0	0	0	0	0	0	0	0	19.8019801980198	0	0	0	0	14.8514851485149	0	0	29.7029702970297	0	0
2011/06/01	NN8-14	14	d1		0	0	0	0	0	0	0	0	0	2.77777777777778	2.77777777777778	0	0	0	0	0	0	1.85185185185185	0	0	0	0	0	0	0	0	0	0	0	0	0	0	0	0	4.62962962962963	0	0	0	0	32.4074074074074	0	0	27.7777777777778	0	0
2011/06/01	NN8-14	14	d2		5.05050505050505	0	0	0	0	0	0	0	0	1.01010101010101	0	0	0	0	0	0	0	0	0	0	0	0	0	0	0	0	0	0	0	0	0	0	0	0	0	0	0	0	0	30.3030303030303	0	0	30.3030303030303	0	0
2011/06/01	NN8-14	14	d3		9.61538461538462	0	0	0	0	0	0	0	0	0.961538461538462	0	0	0	0	0	0	0	0	0	0	0	0	0	0	0	0	0	0	0	0	0	0	0	0	2.88461538461538	0	0	0	0	24.0384615384615	0	0	38.4615384615385	0	0
2011/06/01	NN8-14	14	d4		4.85436893203883	0	0	0	0	0	0	0	0	0	2.9126213592233	0	0	0	0	0	0	0	0	0	0	0	0	0	0	0	0	0	0	0	0	0	4.85436893203883	0	0	0	0	0	0	29.126213592233	4.85436893203883	0	33.9805825242718	0	0
2011/06/03	SW	1	d1		0	0	2.72727272727273	0	0	0	0	0	0	0.909090909090909	0	0	0	0	0	0	0	0	2.72727272727273	0	0	0	0	0	0	0	0	0	0	0	0	0	2.72727272727273	0	0	0	0	0	0	18.1818181818182	0	0	36.3636363636364	0	0
2011/06/03	SW	1	d2		0	0	0	0	0	0	0	0	0	0	0	28.3018867924528	0	0	0	0	0	0	0	0	0	0	0	0	0	0	0	0	0	0	0	0	0	0	0	0	0	0	0	18.8679245283019	0	0	28.3018867924528	0	0
2011/06/03	SW	1	d3		0	0	0	0	0	0	0	0	0	0	0	9.80392156862745	0	9.80392156862745	0	0	0	0	0	0	0	0	0	0	0	0	0	0	0	0	0	0	0	0	0	0	0	0	0	19.6078431372549	0	0	34.3137254901961	0	0
2011/06/03	SW	1	d4		0	0	0	0	0	0	0	0	0	0	0	28.0373831775701	0	2.80373831775701	0	0	0	0	0	0	0	0	0	0	0	0	0	0	0	0	0	0	0	0	0	0	0	0	0	18.6915887850467	0	2.80373831775701	28.0373831775701	0	0
2011/06/03	SW	2	d1		0	0	0	0	0	0	0	0	0	0.943396226415094	0	9.43396226415094	0	2.83018867924528	0	0	2.83018867924528	0	2.83018867924528	0	0	0	0	0	0	0	0	0	0	0	0	0	0	0	0	0	0	0	0	14.1509433962264	0	0	14.1509433962264	0	0
2011/06/03	SW	2	d2		0	0	0	0	0	0	0	0	0	0	0	12.3809523809524	0	0	0	0	1.9047619047619	0	2.85714285714286	0	0	0	0	0	0	0	0	0	0	0.952380952380952	0	0	0	0	0	0	0	0	0	19.047619047619	0	0	19.047619047619	0	0
2011/06/03	SW	2	d3		0	0	0	0	0	0	0	0	0	1.8348623853211	0	32.1100917431193	0	0	0	0	1.8348623853211	0	2.75229357798165	0	0	0	0	0	0	0	0	0	0	1.8348623853211	0	0	0	0	0	0	0	0	0	18.348623853211	0	0	13.7614678899083	0	0
2011/06/03	SW	2	d4		0	0	0	0	0	0	0	0	0	0.925925925925926	0	27.7777777777778	0	0	0	0	2.77777777777778	0	2.77777777777778	0	0	0	0	0	0	0	0	0	0	0	0	0	0	0	0	0	0	0	0	27.7777777777778	0	0	4.62962962962963	0	18.5185185185185
2011/06/03	SW	3	d1		0	0	0	0	0	0	0	0	0	0	0	9.80392156862745	0	4.90196078431373	0	0	2.94117647058824	0	2.94117647058824	0	0	0	0	0	0	0	0	0	0	0	0	0	0	0	2.94117647058824	0	0	0	0	14.7058823529412	0	0	19.6078431372549	0	0
2011/06/03	SW	3	d2		0	0	0	0	0	0	0	0	0	0	0	20	0	3	0	0	0	0	2	0	0	0	0	0	0	0	0	0	0	0	0	0	0	0	0	0	0	0	0	15	0	0	15	0	0
2011/06/03	SW	3	d3		0	0	0	0	0	0	0	0	0	1.88679245283019	0	4.71698113207547	0	4.71698113207547	0	0	0	0	0	0	0	0	0	0	0	0	0	0	0	0	0	0	0	0	4.71698113207547	0	0	0	0	18.8679245283019	0	0	23.5849056603774	0	0
2011/06/03	SW	3	d4		0	0	0	0	0	0	0	0	0	0	0	19.2307692307692	0	24.0384615384615	0	0	0.961538461538462	0	0	0	0	0	0	0	0	0	0	0	0	0	0	0	0	0	0	0	0	0	0	19.2307692307692	0	0	14.4230769230769	0	0
2011/06/03	SW	4	d1		0	0	0	0	0	0	0	0	0	0	0	0	0	1.96078431372549	0	0	0	0	2.94117647058824	0	0	0	0	0	0	0	0	0	0	0	0	0	9.80392156862745	0	0	0	0	0	0	9.80392156862745	0	0	19.6078431372549	0	0
2011/06/03	SW	4	d2		0	0	0	0	0	0	0	0	0	0	0	0	0	2.94117647058824	0	0	0	0	0	0	0	0	0	0	0	0	0	0	0	0	0	0	4.90196078431373	0	1.96078431372549	4.90196078431373	0	0	0	14.7058823529412	0	0	19.6078431372549	0	0
2011/06/03	SW	4	d3		0	0	0	0	0	0	0	0	0	0	0	0	0	4.90196078431373	0	0	0	0	2.94117647058824	0	0	0	0	0	0	0	0	0	0	0	0	0	4.90196078431373	0	4.90196078431373	0	0	0	0	19.6078431372549	0	0	29.4117647058824	0	0
2011/06/03	SW	4	d4		0	0	0	0	0	0	0	0	0	0	0	2.97029702970297	0	0	0	0	0	0	4.95049504950495	0	0	0	0	0	0	0	0	0	0	0	0	0	0	0	0	0	9.9009900990099	0	0	14.8514851485149	0	0	14.8514851485149	0	2.97029702970297
2011/06/03	SE	1	d1		0	0	0	0	0	0	0	0	0	0	0	19.8019801980198	0	0	0	0	0	14.8514851485149	0	0	0	0	0	0	0	0	0	0	0	0	0	0	0	0	0	0	0	0	0	9.9009900990099	0	0	0	0	0
2011/06/03	SE	1	d2		0	0	0	0	0	0	0	0	0	0	0	9.9009900990099	0	0	0	0	0	9.9009900990099	0	0	0	0	0	0	0	0	0	0	0	0	0	0	0	0	14.8514851485149	0	0	0	0	9.9009900990099	0	0	0	0	4.95049504950495
2011/06/03	SE	1	d3		0	0	0	0	0	0	0	0	0	0	0	9.52380952380952	0	0	0	0	2.85714285714286	19.047619047619	0	0	0	0	0	0	0	0	0	0	2.85714285714286	0	0	2.85714285714286	0	0	0	0	0	0	0	9.52380952380952	0	0	9.52380952380952	0	4.76190476190476
2011/06/03	SE	1	d4		0	0	0	0	0	0	0	0	0	0	0	4.76190476190476	0	0	0	0	4.76190476190476	14.2857142857143	0	0	0	0	0	0	0	0	0	0	0.952380952380952	0	0	2.85714285714286	0	0	0	0	0	0	0	0	0	0	28.5714285714286	0	2.85714285714286
2011/06/03	SE	2	d1		0	0	0	0	0	0	0	0	0	0	1.73913043478261	26.0869565217391	0	0	0	0	0	4.34782608695652	2.60869565217391	0	0	0	0	0	0	0	0	0	0	0	0	0	0	0	0	0	0	0	0	13.0434782608696	0	0	8.69565217391304	0	0
2011/06/03	SE	2	d2		0	0	0	0	0	0	0	0	0	0	2.88461538461538	38.4615384615385	0	0	0	0	0	2.88461538461538	0	0	0	0	0	0	0	0	0	0	0	0	0	0	0	0	0	0	0	0	0	0	0	0	0	0	9.61538461538462
2011/06/03	SE	2	d3		0	0	0	0	0	0	0	0	0	0	1.9047619047619	38.0952380952381	0	0	0	0	0	0	1.9047619047619	0	0	0	0	0	0	0	0	0	0	0	0	0	0	0	0	0	0	0	0	4.76190476190476	0	0	2.85714285714286	0	0
2011/06/03	SE	2	d4		0	0	0	0	0	0	0	0	0	0	0.961538461538462	33.6538461538462	0	0	0	0	0	0.961538461538462	0	0	0	0	0	0	0	0	0	0	0	0	0	0	0	0	0	0	0	0	0	0	0	0	0	0	0
2011/06/03	SE	3	d1		0	0	0	0	0	0	0	0	0	0	0	28.5714285714286	0	0	0	0	0	9.52380952380952	0	0	0	0	0	0	0	0	0	0	0	0	0	0	0	0	0	0	0	0	0	14.2857142857143	0	0	14.2857142857143	0	2.85714285714286
2011/06/03	SE	3	d2		0	0	0	0	0	0	0	0	0	0	0	33.9805825242718	0	0	0	0	0	14.5631067961165	0	0	0	0	0	0	0	0	0	0	0	0	0	0	0	0	2.9126213592233	0	0	0	0	0	0	0	9.70873786407767	0	0
2011/06/03	SE	3	d3		0	0	0	0	0	0	0	0	0	0	0	43.6893203883495	0	0	0	0	0	14.5631067961165	0	0	0	0	0	0	0	0	0	0	0	0	0	0	0	0	0	0	0	0	0	0	0	0	9.70873786407767	0	0
2011/06/03	SE	3	d4		0	0	0	0	0	0	0	0	0	0	0	40	0	0	0	0	0	5	0	0	0	0	0	0	0	0	0	0	0	0	0	0	0	0	0	0	0	0	0	0	0	0	0	0	0
2011/06/03	SE	4	d1		0	0	0	0	0	0	0	0	0	0	2.83018867924528	14.1509433962264	0	0	0	0	0	9.43396226415094	0	0	0	0	0	0	0	0	0	0	0	0	0	0	0	0	0	0	0	0	0	23.5849056603774	0	0	9.43396226415094	0	0
2011/06/03	SE	4	d2		0	0	0	0	0	0	0	0	0	0	0	29.126213592233	0	0	0	0	0	14.5631067961165	0	0	0	0	0	0	0	0	0	0	0	0	0	0	0	0	0	0	0	0	0	9.70873786407767	0	0	9.70873786407767	0	0
2011/06/03	SE	4	d3		0	0	0	0	0	0	0	0	0	0	0	33.9805825242718	0	0	0	0	0	9.70873786407767	0	0	0	0	0	0	0	0	0	0	0	0	0	0	0	0	0	0	0	0	0	4.85436893203883	0	0	19.4174757281553	0	0
2011/06/03	SE	4	d4		0	0	0	0	0	0	0	0	0	0	0	38.4615384615385	0	0	0	0	0	4.80769230769231	0	0	0	0	0	0	0	0	0	0	0	0	0	0	0	0	0	0	9.61538461538462	0	0	2.88461538461538	0	0	9.61538461538462	0	0
2011/06/12	NN1-7	1	d1		0.970873786407767	0	0	0	0	0	0	0	0	4.85436893203883	0	0	0	0	0	0	0	0	0	0	0	0	0	0	0	0	0	0	0	0	0	1.94174757281553	0	0	0	0	0	0	0	4.85436893203883	0	0	4.85436893203883	0	14.5631067961165
2011/06/12	NN1-7	1	d2		5	0	0	0	0	0	0	0	0	3	0	0	0	0	0	0	0	0	0	0	0	0	0	0	0	0	0	0	0	0	0	0	0	0	0	0	0	0	0	15	0	2	0	0	20
2011/06/12	NN1-7	1	d3		3	0	0	0	0	0	0	0	0	3	0	0	0	0	0	0	0	0	0	0	0	0	0	0	0	2	0	0	0	0	0	0	0	0	0	0	0	0	0	20	0	0	0	0	0
2011/06/12	NN1-7	1	d4		0	0	0	0	0	0	0	0	0	2.94117647058824	0	0	0	0	0	0	0	0	0	0	0	0	0	0	0	0	0	0	0	0	0	0	0	0	0	0	0	0	0	44.1176470588235	0	0	0	0	2.94117647058824
2011/06/12	NN1-7	2	d1		0	0	0	0	0	0	0	0	0	2.97029702970297	0	0	0	0	0	0	0	0	0	0	0	0	0	0	0	0	0	0	0	0	0	4.95049504950495	0	0	0	0	0	0	0	9.9009900990099	0	0	2.97029702970297	0	4.95049504950495
2011/06/12	NN1-7	2	d2		0	0	0	0	0	0	0	0	0	5	0	0	0	0	0	0	0	0	0	0	0	0	0	0	0	0	0	0	0	0	0	0	0	0	0	0	0	0	0	5	0	0	5	0	10
2011/06/12	NN1-7	2	d3		0	0	0	0	0	0	0	0	0	4.76190476190476	0	0	0	0	0	0	0	0	0	0	0	0	0	0	0	0	0	0	0	0	0	0	0	0	0	0	0	0	0	14.2857142857143	0	0	0	0	9.52380952380952
2011/06/12	NN1-7	2	d4		0	0	0	0	0	0	0	0	0	3.06122448979592	0	0	0	0	0	0	0	0	0	0	0	0	0	0	0	0	0	0	0	0	0	0	0	0	0	0	0	0	0	30.6122448979592	0	0	0	0	5.10204081632653
2011/06/12	NN1-7	3	d1		0	0	0	0	0	0	0	0	0	2.97029702970297	0	0	0	0	0	0	0	0	0	0	0	0	0	0	0	0	0	0	0	0	0	0	0	0	0	0	0	0	0	29.7029702970297	0	4.95049504950495	0	0	0
2011/06/12	NN1-7	3	d2		0	0	0	0	0	0	0	0	0	2.85714285714286	2.85714285714286	0	0	0	0	0	0	2.85714285714286	0	0	0	0	0	0	0	0	0	0	0	0	0	0	0	0	0	0	0	0	0	9.52380952380952	0	0	2.85714285714286	0	9.52380952380952
2011/06/12	NN1-7	3	d3		0	0	0	0	0	0	0	0	0	2.97029702970297	4.95049504950495	0	0	2.97029702970297	0	0	0	4.95049504950495	0	0	0	0	0	0	0	0	0	0	0	0	0	0	0	0	0	0	0	0	0	29.7029702970297	0	0	0	0	4.95049504950495
2011/06/12	NN1-7	3	d4		0	0	0	0	0	0	0	0	0	2.9126213592233	0	0	0	0	0	0	0	0	0	0	0	0	0	0	0	0	0	0	0	0	0	0	0	0	0	0	0	0	0	38.8349514563107	0	0	0	0	9.70873786407767
2011/06/12	NN1-7	4	d1		0	0	0	0	0	0	0	0	0	4.71698113207547	0	0	0	0	9.43396226415094	0	0	9.43396226415094	0	0	0	0	0	0	0	0	0	0	0	0	0	0	0	0	0	0	0	0	0	33.0188679245283	0	0	0	0	2.83018867924528
2011/06/12	NN1-7	4	d2		0	0	0	0	0	0	0	0	0	4.95049504950495	2.97029702970297	0	0	0	9.9009900990099	0	0	14.8514851485149	0	0	0	0	0	0	0	0	0	0	0	0	0	0	0	0	0	0	0	0	0	4.95049504950495	0	0	0	0	0
2011/06/12	NN1-7	4	d3		0	0	0	0	0	0	0	0	0	5	5	0	0	0	10	0	0	15	0	0	0	0	0	0	0	0	0	0	0	0	0	5	0	0	0	0	0	0	0	15	0	0	0	0	5
2011/06/12	NN1-7	4	d4		0	0	0	0	0	0	0	0	0	0.980392156862745	4.90196078431373	0	0	0	9.80392156862745	0	0	4.90196078431373	0	0	0	0	0	0	0	0	0	0	0	0	0	0	0	0	0	0	0	0	0	39.2156862745098	0	0	9.80392156862745	0	2.94117647058824
2011/06/12	NN1-7	5	d1		0	0	0	0	0	0	0	0	0	3.03030303030303	1.01010101010101	0	0	0	0	0	0	5.05050505050505	0	0	0	0	0	0	0	0	0	0	0	0	0	0	0	0	0	0	0	0	0	40.4040404040404	0	0	0	0	0
2011/06/12	NN1-7	5	d2		0	0	0	0	0	0	0	0	0	5.10204081632653	5.10204081632653	0	0	0	0	0	0	10.2040816326531	0	0	0	0	0	0	0	0	0	0	0	0	0	0	0	0	0	0	0	0	0	10.2040816326531	0	0	0	0	10.2040816326531
2011/06/12	NN1-7	5	d3		0	0	0	0	0	0	0	0	0	5	5	0	0	0	0	0	0	15	0	0	0	0	0	0	0	0	0	0	0	0	0	0	0	0	0	0	0	0	0	10	0	0	5	0	0
2011/06/12	NN1-7	5	d4		0	0	0	0	0	0	0	0	0	1.96078431372549	19.6078431372549	0	0	0	0	0	0	9.80392156862745	0	0	0	0	0	0	0	0	0	0	0	0	0	4.90196078431373	0	0	0	0	0	0	0	29.4117647058824	0	0	9.80392156862745	0	0
2011/06/12	NN1-7	6	d1		0	0	0	0	0	0	0	0	0	5.20833333333333	0	0	0	0	0	0	0	10.4166666666667	0	0	0	0	0	0	0	0	0	0	0	0	0	0	0	0	0	0	0	0	0	10.4166666666667	0	0	10.4166666666667	0	5.20833333333333
2011/06/12	NN1-7	6	d2		0	0	0	0	0	0	0	0	0	5.26315789473684	0	0	0	0	0	0	0	3.15789473684211	0	0	0	0	0	0	0	0	0	0	0	0	0	0	0	0	0	0	0	0	0	10.5263157894737	0	0	2.10526315789474	0	15.7894736842105
2011/06/12	NN1-7	6	d3		0	0	0	0	0	0	0	0	0	5	5	0	0	0	0	0	0	10	0	0	0	0	0	0	0	0	0	0	0	0	0	0	0	0	0	0	0	0	0	15	0	0	10	0	0
2011/06/12	NN1-7	6	d4		0	0	0	0	0	0	0	0	0	2.77777777777778	18.5185185185185	0	0	0	0	0	0	4.62962962962963	0	0	0	0	0	0	0	0	0	0	0	0	0	0	0	0	0	0	0	0	0	13.8888888888889	0	0	13.8888888888889	0	0
2011/06/12	NN1-7	7	d1		0	0	0	0	0	0	0	0	0	2.88461538461538	0	0	33.6538461538462	0	0	0	0	0	0	0	0	0	2.88461538461538	0	0	0	0	0	0	0	0	0	0	0	0	0	0	0	0	0	0	9.61538461538462	14.4230769230769	0	0
2011/06/12	NN1-7	7	d2		0	0	0	0	0	0	0	0	0	2.83018867924528	0	0	56.6037735849057	0	0	0	0	0	0	0	0	0	0	0	0	0	0	0	0	0	0	0	0	0	0	0	0	0	0	2.83018867924528	0	0	9.43396226415094	0	0
2011/06/12	NN1-7	7	d3		0	0	0	0	0	0	0	0	0	2.9126213592233	0	0	38.8349514563107	0	0	0	0	0	0	0	0	0	4.85436893203883	0	0	0	0	0	0	0	0	0	0	0	0	0	0	0	0	4.85436893203883	0	0	9.70873786407767	0	4.85436893203883
2011/06/12	NN1-7	7	d4		0	0	0	0	0	0	0	0	0	0	0	0	20	0	0	0	0	10	0	0	0	0	10	0	0	0	0	0	0	0	0	0	0	0	0	0	0	0	0	30	0	0	10	0	0
2011/06/12	NN8-14	8	d1		0	0	0	0	0	0	0	0	0	0.961538461538462	0	0	0	0	0	0	0	0	0	0	0	38.4615384615385	0	0	0	0	0	0	0	0	0	0	0	0	0	0	0	0	0	2.88461538461538	0	0	19.2307692307692	0	0
2011/06/12	NN8-14	8	d2		0	0	0	0	0	0	0	0	0	5	0	0	10	0	0	0	0	0	0	0	0	0	0	0	0	0	0	0	0	0	0	0	0	0	0	0	0	0	0	15	0	0	25	0	0
2011/06/12	NN8-14	8	d3		0	0	0	0	0	0	0	0	0	3.06122448979592	0	0	10.2040816326531	0	0	0	0	5.10204081632653	0	0	0	0	0	0	0	0	0	0	0	0	0	0	0	0	0	0	0	0	0	10.2040816326531	0	0	20.4081632653061	0	5.10204081632653
2011/06/12	NN8-14	8	d4		0	0	0	0	0	0	0	0	0	2.9126213592233	0	0	0	0	0	0	0	14.5631067961165	0	0	0	0	0	0	0	0	0	0	0	0	0	0	0	0	0	0	0	0	0	29.126213592233	0	0	29.126213592233	0	0
2011/06/15	NN8-14	9	d1		0	0	0	0	0	0	0	0	0	4.76190476190476	0	0	0	0	0	0	0	0	0	0	0	0	0	0	0	0	0	0	0	0	0	0	0	0	0	0	0	0	0	33.3333333333333	0	0	33.3333333333333	0	4.76190476190476
2011/06/15	NN8-14	9	d2		0	0	0	0	0	0	0	0	0	4.95049504950495	0	0	0	0	0	0	0	0	0	0	0	0	0	0	0	0	0	0	0	0	0	0	0	0	0	0	0	0	0	24.7524752475248	0	0	34.6534653465347	0	9.9009900990099
2011/06/15	NN8-14	9	d3		0	0	0	0	0	0	0	0	0	5	0	0	0	0	0	0	0	5	0	0	0	0	0	0	0	0	0	0	0	0	0	0	0	0	0	0	0	0	0	35	0	0	30	0	0
2011/06/15	NN8-14	9	d4		0	0	0	0	0	0	0	0	0	2.97029702970297	4.95049504950495	0	0	0	0	0	0	2.97029702970297	0	0	0	0	0	0	0	0	0	0	0	0	0	0	0	0	0	0	0	0	0	29.7029702970297	0	0	29.7029702970297	0	0
2011/06/15	NN8-14	10	d1		0	0	0	0	0	0	0	0	0	4.85436893203883	0	0	0	0	0	0	0	0	0	0	0	0	0	0	0	0	0	0	0	0	0	0	0	0	0	0	0	0	0	33.9805825242718	0	0	38.8349514563107	0	0
2011/06/15	NN8-14	10	d2		0	0	0	0	0	0	0	0	0	4.85436893203883	0	0	0	0	0	0	0	4.85436893203883	0	0	0	0	0	0	0	0	0	0	0	0	0	0	0	0	0	0	0	0	0	33.9805825242718	0	0	38.8349514563107	0	0
2011/06/15	NN8-14	10	d3		0	0	0	0	0	0	0	0	0	4.71698113207547	2.83018867924528	0	0	0	0	0	0	2.83018867924528	0	0	0	0	0	0	0	0	0	0	0	0	0	0	0	0	0	0	0	0	0	37.7358490566038	0	0	33.0188679245283	0	0
2011/06/15	NN8-14	10	d4		0	0	0	0	0	0	0	0	0	4.71698113207547	2.83018867924528	0	0	0	0	0	0	4.71698113207547	0	0	0	0	0	0	0	0	0	0	0	0	0	0	0	0	0	0	0	0	0	18.8679245283019	0	0	28.3018867924528	0	0
2011/06/15	NN8-14	11	d1		0	0	0	0	0	0	0	0	0	5	0	0	0	0	0	0	0	0	0	0	0	0	0	0	0	0	0	0	0	0	0	0	0	0	0	0	0	0	0	40	0	0	20	0	0
2011/06/15	NN8-14	11	d2		0	0	0	0	0	0	0	0	0	5	0	0	0	0	0	0	0	0	0	0	0	0	0	0	0	0	0	0	0	0	0	0	10	0	0	0	0	0	0	50	0	0	20	0	0
2011/06/15	NN8-14	11	d3		0	0	0	0	0	0	0	0	0	5	0	0	0	0	0	0	0	0	0	0	0	5	0	0	0	0	0	0	0	0	0	0	0	0	0	0	0	0	0	40	0	0	35	0	0
2011/06/15	NN8-14	11	d4		0	0	0	0	0	0	0	0	0	5	0	0	0	0	0	0	0	0	0	0	0	10	0	0	0	0	0	0	0	0	0	0	0	0	0	0	0	0	0	25	0	0	25	0	0
2011/06/15	NN8-14	12	d1		0	0	0	0	0	0	0	0	0	5	0	0	0	0	0	0	0	0	0	0	0	0	0	0	0	0	0	0	0	0	0	0	0	0	0	0	0	0	0	40	0	0	30	0	0
2011/06/15	NN8-14	12	d2		0	0	0	0	0	0	0	0	0	4.85436893203883	0	0	0	0	0	0	0	0	0	0	0	0	0	0	0	0	0	0	0	0	0	0	0	0	0	0	0	0	0	43.6893203883495	0	0	29.126213592233	0	0
2011/06/15	NN8-14	12	d3		0	0	0	0	0	0	0	0	0	5	0	0	0	0	0	0	0	0	0	0	0	0	0	0	0	0	0	0	0	0	0	0	0	0	0	0	0	0	0	40	0	0	35	0	5
2011/06/15	NN8-14	12	d4		0	0	0	0	0	0	0	0	0	5	5	0	0	0	0	0	0	0	0	0	0	0	0	0	0	0	0	0	0	0	0	0	0	0	0	0	0	0	0	30	0	0	20	0	0
2011/06/15	NN8-14	13	d1		9.9009900990099	0	0	0	0	0	0	0	0	4.95049504950495	4.95049504950495	0	0	0	0	0	0	0	0	0	0	0	0	0	0	0	0	0	0	0	2.97029702970297	0	0	0	0	0	0	0	0	19.8019801980198	0	0	39.6039603960396	0	0
2011/06/15	NN8-14	13	d2		0	0	0	0	0	0	0	0	0	5	0	0	0	0	0	0	0	0	0	0	0	0	0	0	0	0	0	0	0	0	0	0	10	0	5	0	0	0	0	30	0	0	20	0	0
2011/06/15	NN8-14	13	d3		5	0	0	0	0	0	0	0	0	5	0	0	0	0	0	0	0	0	0	0	0	0	0	0	0	0	0	0	0	0	0	0	0	0	20	0	0	0	0	20	0	0	30	0	5
2011/06/15	NN8-14	13	d4		10	0	0	0	0	0	0	0	0	5	0	0	0	0	0	0	0	0	0	0	0	0	0	0	0	0	0	0	0	0	0	0	0	0	20	0	0	0	0	15	0	0	35	0	0
2011/06/15	NN8-14	14	d1		0	0	0	0	0	0	0	0	0	5.26315789473684	5.26315789473684	0	0	0	0	0	0	0	0	0	0	0	0	0	0	0	0	0	0	0	0	0	0	0	10.5263157894737	0	0	0	0	26.3157894736842	0	0	21.0526315789474	0	0
2011/06/15	NN8-14	14	d2		10	0	0	0	0	0	0	0	0	5	0	0	0	0	0	0	0	0	0	0	0	0	0	0	0	0	0	0	0	0	0	0	0	0	0	0	0	0	0	30	0	0	40	0	0
2011/06/15	NN8-14	14	d3		15	0	0	0	0	0	0	0	0	5	0	0	0	0	0	0	0	0	0	0	0	0	0	0	0	0	0	0	0	0	0	0	0	0	10	0	0	0	0	30	0	0	30	0	0
2011/06/15	NN8-14	14	d4		9.70873786407767	0	0	0	0	0	0	0	0	4.85436893203883	4.85436893203883	0	0	0	0	0	0	0	0	0	0	0	0	0	0	0	0	0	0	0	0	0	9.70873786407767	0	2.9126213592233	0	0	0	0	14.5631067961165	0	0	38.8349514563107	0	0
2011/06/17	SW	1	d1		0	0	0	0	0	0	0	0	0	9.70873786407767	0	0	0	0	0	0	0	0	0	0	0	0	0	0	0	0	0	0	0	0	0	0	4.85436893203883	0	0	0	0	0	0	24.2718446601942	0	0	29.126213592233	0	0
2011/06/17	SW	1	d2		0	0	0	0	0	0	0	0	0	8.84955752212389	0	26.5486725663717	0	0	0	0	0	0	0	0	0	0	0	0	0	0	0	0	0	0	0	0	0	0	0	0	0	0	0	22.1238938053097	0	0	26.5486725663717	0	0
2011/06/17	SW	1	d3		0	0	0	0	0	0	0	0	0	9.52380952380952	0	9.52380952380952	0	9.52380952380952	0	0	0	0	0	0	0	0	0	0	0	0	0	0	0	0	0	0	0	0	0	0	0	0	0	28.5714285714286	0	0	28.5714285714286	0	0
2011/06/17	SW	1	d4		0	0	0	0	0	0	0	0	0	9.70873786407767	0	4.85436893203883	0	4.85436893203883	0	0	0	0	0	0	0	0	0	0	0	0	0	0	0	0	0	0	0	0	0	0	0	4.85436893203883	0	24.2718446601942	0	0	29.126213592233	0	0
2011/06/17	SW	2	d1		0	0	0	0	0	0	0	0	0	11.3636363636364	0	5.68181818181818	0	3.40909090909091	0	0	0	0	0	0	0	0	0	0	0	0	0	0	0	0	0	0	0	0	0	0	0	0	0	17.0454545454545	0	0	22.7272727272727	0	0
2011/06/17	SW	2	d2		0	0	0	0	0	0	0	0	0	9.9009900990099	0	9.9009900990099	0	0	0	0	0	0	0	0	4.95049504950495	0	0	0	0	0	0	0	0	0	0	0	0	0	0	0	0	0	0	29.7029702970297	0	0	14.8514851485149	0	0
2011/06/17	SW	2	d3		0	0	0	0	0	0	0	0	0	9.9009900990099	0	9.9009900990099	0	0	0	0	0	0	0	0	0	0	0	0	0	0	0	0	0	0	0	0	0	0	0	0	0	0	0	29.7029702970297	0	0	19.8019801980198	0	0
2011/06/17	SW	2	d4		0	0	0	0	0	0	0	0	0	10.1010101010101	0	5.05050505050505	0	0	0	0	3.03030303030303	0	3.03030303030303	0	0	0	0	0	0	0	0	0	0	0	0	0	0	0	0	0	0	10.1010101010101	0	15.1515151515152	0	0	0	0	5.05050505050505
2011/06/17	SW	3	d1		0	0	0	0	0	0	0	0	0	9.43396226415094	0	23.5849056603774	0	2.83018867924528	0	0	0	0	0	0	0	0	0	0	0	0	0	0	0	0	0	0	0	0	0	0	0	0	0	9.43396226415094	0	0	14.1509433962264	0	2.83018867924528
2011/06/17	SW	3	d2		0	0	0	0	0	0	0	0	0	13.8888888888889	0	23.1481481481481	0	0	0	0	0	0	0	0	0	0	0	0	0	0	0	0	0	0	0	0	0	0	0	0	0	0	0	13.8888888888889	0	0	13.8888888888889	0	0
2011/06/17	SW	3	d3		0	0	0	0	0	0	0	0	0	13.8888888888889	0	9.25925925925926	0	4.62962962962963	0	0	0	0	0	0	0	0	0	0	0	0	0	0	0	0	0	0	0	0	0	0	0	0	0	23.1481481481481	0	0	13.8888888888889	0	0
2011/06/17	SW	3	d4		0	0	0	0	0	0	0	0	0	9.52380952380952	0	0	0	14.2857142857143	0	0	0	0	0	0	0	0	0	0	0	0	0	0	0	0	0	0	0	0	0	0	0	4.76190476190476	0	14.2857142857143	0	0	14.2857142857143	0	4.76190476190476
2011/06/17	SW	4	d1		0	0	0	0	0	0	0	0	0	12.8205128205128	0	0	0	0	0	0	0	0	0	0	0	0	0	0	0	0	0	0	0	0	0	0	25.6410256410256	0	0	0	0	0	0	19.2307692307692	0	0	12.8205128205128	0	0
2011/06/17	SW	4	d2		0	0	0	0	0	0	0	0	0	15	0	0	0	0	0	0	0	0	0	0	0	0	0	0	0	0	0	0	0	0	0	0	15	0	0	0	0	0	0	20	0	0	10	0	0
2011/06/17	SW	4	d3		0	0	0	0	0	0	0	0	0	19.4174757281553	0	0	0	2.9126213592233	0	0	0	0	0	0	0	0	0	0	0	0	0	0	0	0	0	0	9.70873786407767	0	0	0	0	0	0	24.2718446601942	0	0	9.70873786407767	0	0
2011/06/17	SW	4	d4		0	0	0	0	0	0	0	0	0	20.4081632653061	0	0	0	3.06122448979592	0	0	0	0	0	0	0	0	0	0	0	0	0	0	0	0	0	0	0	0	0	0	0	0	0	20.4081632653061	0	0	15.3061224489796	0	0
2011/06/17	SE	1	d1		0	0	0	0	0	0	0	0	0	10	0	15	0	0	0	0	0	5	0	0	0	0	0	0	0	0	0	0	0	0	0	0	0	0	0	0	0	0	0	20	0	0	5	0	0
2011/06/17	SE	1	d2		0	0	0	0	0	0	0	0	0	9.70873786407767	0	9.70873786407767	0	0	0	0	0	14.5631067961165	0	0	0	0	0	0	0	0	0	0	0	0	0	0	0	0	9.70873786407767	0	0	0	0	0	0	0	0	0	9.70873786407767
2011/06/17	SE	1	d3		0	0	0	0	0	0	0	0	0	9.9009900990099	0	14.8514851485149	0	2.97029702970297	0	0	2.97029702970297	24.7524752475248	0	0	0	0	0	0	0	0	0	0	0	0	0	0	0	0	0	0	0	0	0	9.9009900990099	0	0	4.95049504950495	0	0
2011/06/17	SE	1	d4		0	0	0	0	0	0	0	0	0	15.625	0	15.625	0	0	0	0	3.125	20.8333333333333	0	0	0	0	0	0	0	0	0	0	0	0	0	0	0	0	0	0	0	0	0	0	0	0	15.625	0	0
2011/06/17	SE	2	d1		0	0	0	0	0	0	0	0	0	20	0	25	0	0	0	0	0	5	0	0	0	0	0	0	0	0	0	0	0	0	0	0	0	0	0	0	0	0	0	20	0	0	5	0	0
2011/06/17	SE	2	d2		0	0	0	0	0	0	0	0	0	14.8514851485149	0	29.7029702970297	0	0	0	0	0	2.97029702970297	0	0	0	0	0	0	0	0	0	0	0	0	0	0	0	0	0	0	0	0	0	0	0	0	0	0	14.8514851485149
2011/06/17	SE	2	d3		0	0	0	0	0	0	0	0	0	16.6666666666667	0	22.2222222222222	0	0	0	0	0	0	0	0	0	0	0	0	0	0	0	0	0	0	0	0	0	0	0	0	0	0	0	16.6666666666667	0	0	5.55555555555556	0	11.1111111111111
2011/06/17	SE	2	d4		0	0	0	0	0	0	0	0	0	16.6666666666667	0	38.8888888888889	0	0	0	0	0	5.55555555555556	0	0	0	0	0	0	0	0	0	0	0	0	0	0	0	0	0	0	0	0	0	0	0	0	0	0	0
2011/06/17	SE	3	d1		0	0	0	0	0	0	0	0	0	9.70873786407767	0	19.4174757281553	0	0	0	0	0	4.85436893203883	0	0	0	0	0	0	0	0	0	0	0	0	0	0	0	0	0	0	0	0	0	24.2718446601942	0	0	9.70873786407767	0	4.85436893203883
2011/06/17	SE	3	d2		0	0	0	0	0	0	0	0	0	5.26315789473684	0	42.1052631578947	0	0	0	0	0	5.26315789473684	0	0	0	0	0	0	0	0	0	0	0	0	0	0	0	0	0	0	0	0	0	5.26315789473684	0	0	5.26315789473684	0	0
2011/06/17	SE	3	d3		0	0	0	0	0	0	0	0	0	5.10204081632653	0	35.7142857142857	0	0	0	0	0	10.2040816326531	0	0	0	0	0	0	0	0	0	0	0	0	0	0	0	0	0	0	0	0	0	0	0	0	10.2040816326531	0	0
2011/06/17	SE	3	d4		0	0	0	0	0	0	0	0	0	5.55555555555556	0	33.3333333333333	0	0	0	0	0	11.1111111111111	0	0	0	0	0	0	0	0	0	0	0	0	0	0	0	0	0	0	0	0	0	0	0	0	5.55555555555556	0	0
2011/06/17	SE	4	d1		0	0	0	0	0	0	0	0	0	9.70873786407767	0	9.70873786407767	2.9126213592233	0	0	0	0	9.70873786407767	0	0	0	0	0	0	0	0	0	0	0	0	0	0	0	0	0	0	0	0	0	19.4174757281553	0	0	9.70873786407767	0	4.85436893203883
2011/06/17	SE	4	d2		0	0	0	0	0	0	0	0	0	9.43396226415094	0	23.5849056603774	0	0	0	0	0	9.43396226415094	0	0	0	0	0	0	0	0	0	0	0	0	0	0	0	0	0	0	0	0	0	4.71698113207547	0	0	14.1509433962264	0	4.71698113207547
2011/06/17	SE	4	d3		0	0	0	0	0	0	0	0	0	10.2040816326531	0	25.5102040816327	0	0	0	0	0	15.3061224489796	0	0	0	0	0	0	0	0	0	0	0	0	0	0	0	0	0	0	0	0	0	0	0	0	15.3061224489796	0	0
2011/06/17	SE	4	d4		0	0	0	0	0	0	0	0	0	5.10204081632653	0	15.3061224489796	15.3061224489796	0	0	0	0	0	0	0	0	0	0	0	0	0	0	0	0	0	0	0	0	0	0	0	5.10204081632653	0	0	5.10204081632653	0	0	10.2040816326531	0	0
2011/06/28	NN1-7	1	d1		2.9126213592233	0	0	0	0	0	0	0	0	4.85436893203883	0	0	0	0	0	0	0	0	0	0	0	0	0	0	0	0	0	0	0	0	0	0	0	0	0	0	0	0	0	19.4174757281553	0	0	4.85436893203883	0	29.126213592233
2011/06/28	NN1-7	1	d2		3.06122448979592	0	0	0	0	0	0	0	0	5.10204081632653	0	0	0	0	0	0	0	0	0	0	0	0	0	0	0	0	0	0	0	0	0	0	0	0	0	0	0	0	0	25.5102040816327	0	0	0	0	25.5102040816327
2011/06/28	NN1-7	1	d3		0	0	0	0	0	0	0	0	0	5	0	0	0	0	0	0	0	0	0	0	0	0	0	0	0	0	0	0	0	0	0	0	0	0	0	0	0	0	0	40	0	0	0	0	0
2011/06/28	NN1-7	1	d4		0	0	0	0	0	0	0	0	0	4.76190476190476	0	0	0	0	0	0	0	0	0	0	0	0	0	0	0	0	0	0	0	0	0	0	0	0	0	0	0	0	0	57.1428571428571	0	0	0	0	4.76190476190476
2011/06/28	NN1-7	2	d1		0	0	0	0	0	0	0	0	0	10	0	0	0	0	0	0	0	0	0	0	0	0	0	0	0	0	0	0	0	0	0	0	0	0	0	0	0	0	0	10	0	0	5	0	10
2011/06/28	NN1-7	2	d2		0	0	0	0	0	0	0	0	0	15	0	0	0	0	0	0	0	0	0	0	0	0	0	0	0	0	0	0	0	0	0	0	0	0	0	0	0	0	0	5	0	0	5	0	10
2011/06/28	NN1-7	2	d3		0	0	0	0	0	0	0	0	0	10.5263157894737	0	0	0	0	0	0	0	0	0	0	0	0	0	0	0	0	0	0	0	0	0	0	0	0	0	0	0	0	0	26.3157894736842	0	0	0	0	26.3157894736842
2011/06/28	NN1-7	2	d4		0	0	0	0	0	0	0	0	0	10	0	0	0	0	0	0	0	0	0	0	0	0	0	0	0	0	0	0	0	0	0	0	0	0	0	0	0	0	0	65	0	0	0	0	5
2011/06/28	NN1-7	3	d1		0	0	0	0	0	0	0	0	0	4.95049504950495	0	0	0	0	0	0	0	4.95049504950495	0	0	0	0	0	0	0	0	0	0	0	0	0	0	0	0	0	0	0	0	0	14.8514851485149	0	0	0	0	2.97029702970297
2011/06/28	NN1-7	3	d2		0	0	0	0	0	0	0	0	0	4.71698113207547	2.83018867924528	0	0	0	0	0	0	4.71698113207547	0	0	0	0	0	0	0	0	0	0	0	0	0	0	0	0	0	0	0	0	0	4.71698113207547	0	0	0	0	4.71698113207547
2011/06/28	NN1-7	3	d3		0	0	0	0	0	0	0	0	0	4.85436893203883	0	0	0	2.9126213592233	0	0	0	0	0	0	0	0	0	0	0	0	0	0	0	0	0	0	0	0	0	0	0	0	0	29.126213592233	0	0	0	0	4.85436893203883
2011/06/28	NN1-7	3	d4		0	0	0	0	0	0	0	0	0	5	0	0	0	0	0	0	0	5	0	0	0	0	0	0	0	0	0	0	0	0	0	0	0	0	0	0	0	0	0	40	0	0	0	0	5
2011/06/28	NN1-7	4	d1		0	0	0	0	0	0	0	0	0	9.70873786407767	0	0	0	0	0	0	0	4.85436893203883	0	0	0	0	0	0	0	0	0	0	0	0	0	0	0	0	0	0	0	0	0	19.4174757281553	0	0	0	0	0
2011/06/28	NN1-7	4	d2		0	0	0	0	0	0	0	0	0	10	0	0	0	0	5	0	0	15	0	0	0	0	0	0	0	0	0	0	0	0	0	0	0	0	0	0	0	0	0	5	0	0	0	0	0
2011/06/28	NN1-7	4	d3		0	0	0	0	0	0	0	0	0	9.52380952380952	4.76190476190476	0	0	0	0	0	0	14.2857142857143	0	0	0	0	0	0	0	0	0	0	0	0	0	0	0	0	0	0	0	0	0	28.5714285714286	0	0	0	0	0
2011/06/28	NN1-7	4	d4		0	0	0	0	0	0	0	0	0	10	0	0	0	0	5	0	0	5	0	0	0	0	0	0	0	0	0	0	0	0	0	0	0	0	0	0	0	0	0	30	0	0	10	0	0
2011/06/28	NN1-7	5	d1		0	0	0	0	0	0	0	0	0	9.9009900990099	0	0	0	0	0	0	0	4.95049504950495	0	0	0	0	0	0	0	0	0	0	0	0	0	0	0	0	0	0	0	0	0	19.8019801980198	0	0	0	0	2.97029702970297
2011/06/28	NN1-7	5	d2		0	0	0	0	0	0	0	0	0	5.26315789473684	0	0	0	0	0	0	0	10.5263157894737	0	0	0	0	0	0	0	0	0	0	0	0	0	0	0	0	0	0	0	0	0	10.5263157894737	0	0	0	0	21.0526315789474
2011/06/28	NN1-7	5	d3		0	0	0	0	0	0	0	0	0	9.52380952380952	0	0	0	0	0	0	0	14.2857142857143	0	0	0	0	0	0	0	0	0	0	0	0	0	0	0	0	0	0	0	0	0	19.047619047619	0	0	4.76190476190476	0	0
2011/06/28	NN1-7	5	d4		0	0	0	0	0	0	0	0	0	9.70873786407767	4.85436893203883	0	0	0	0	0	0	9.70873786407767	0	0	0	0	0	0	0	0	0	0	0	0	0	0	0	0	0	0	0	0	0	29.126213592233	0	0	9.70873786407767	0	0
2011/06/28	NN1-7	6	d1		0	0	0	0	0	0	0	0	0	9.70873786407767	0	0	0	0	0	0	0	9.70873786407767	0	0	0	0	0	0	0	0	0	0	0	0	0	0	0	0	0	0	0	0	0	14.5631067961165	0	0	4.85436893203883	0	4.85436893203883
2011/06/28	NN1-7	6	d2		0	0	0	0	0	0	0	0	0	15.7894736842105	0	0	0	0	0	0	0	0	0	0	0	0	0	0	0	0	0	0	0	0	0	0	0	0	0	0	0	0	0	5.26315789473684	0	0	0	0	10.5263157894737
2011/06/28	NN1-7	6	d3		0	0	0	0	0	0	0	0	0	9.25925925925926	4.62962962962963	0	0	0	0	0	0	9.25925925925926	0	0	0	0	0	0	0	0	0	0	0	0	0	0	0	0	0	0	0	0	0	4.62962962962963	0	0	4.62962962962963	0	0
2011/06/28	NN1-7	6	d4		0	0	0	0	0	0	0	0	0	15.7894736842105	5.26315789473684	0	0	0	0	0	0	5.26315789473684	0	0	0	0	0	0	0	0	0	0	0	0	0	0	0	0	0	0	0	0	0	21.0526315789474	0	0	21.0526315789474	0	0
2011/06/28	NN1-7	7	d1		0	0	0	0	0	0	0	0	0	9.9009900990099	0	24.7524752475248	0	0	0	0	0	0	0	0	0	0	0	0	0	0	0	0	0	0	0	0	0	0	0	0	0	0	0	0	0	0	9.9009900990099	0	2.97029702970297
2011/06/28	NN1-7	7	d2		0	0	0	0	0	0	0	0	0	4.85436893203883	0	0	48.5436893203884	0	0	0	0	0	0	0	0	0	0	0	0	0	0	0	0	0	0	0	0	0	0	0	0	0	0	4.85436893203883	0	0	2.9126213592233	0	0
2011/06/28	NN1-7	7	d3		0	0	0	0	0	0	0	0	0	9.52380952380952	0	0	38.0952380952381	0	0	0	0	0	0	0	0	0	0	0	0	0	0	0	0	0	0	0	0	0	0	0	0	0	0	4.76190476190476	0	0	9.52380952380952	0	4.76190476190476
2011/06/28	NN1-7	7	d4		0	0	0	0	0	0	0	0	0	10.752688172043	0	0	10.752688172043	0	0	0	0	0	0	0	0	0	10.752688172043	0	0	0	0	0	0	0	0	0	0	0	0	0	0	0	0	16.1290322580645	0	0	5.37634408602151	0	0
2011/06/28	NN8-14	8	d1		0	0	0	0	0	0	0	0	0	9.9009900990099	0	0	0	0	0	0	0	0	0	0	0	19.8019801980198	0	0	0	0	0	0	0	0	0	0	0	0	0	0	0	0	0	2.97029702970297	0	0	19.8019801980198	0	4.95049504950495
2011/06/28	NN8-14	8	d2		0	0	0	0	0	0	0	0	0	14.8514851485149	0	0	0	0	0	0	0	0	0	0	0	0	0	0	0	0	0	0	0	0	0	0	0	0	0	0	0	0	0	9.9009900990099	0	2.97029702970297	19.8019801980198	0	0
2011/06/28	NN8-14	8	d3		0	0	0	0	0	0	0	0	0	5.68181818181818	0	0	5.68181818181818	0	0	0	0	3.40909090909091	0	0	0	0	0	0	0	0	0	0	0	0	0	0	0	0	0	0	0	0	0	17.0454545454545	0	0	11.3636363636364	0	11.3636363636364
2011/06/28	NN8-14	8	d4		0	0	0	0	0	0	0	0	0	9.52380952380952	0	0	0	0	0	0	0	9.52380952380952	0	0	0	0	0	0	0	0	0	0	0	0	0	0	0	0	0	0	0	0	0	19.047619047619	0	0	33.3333333333333	0	0
2011/06/28	NN8-14	9	d1		0	0	0	0	0	0	0	0	0	10	0	0	0	0	0	0	0	0	0	0	0	0	0	0	0	0	0	0	0	0	0	0	0	0	0	0	0	0	0	20	0	0	35	0	5
2011/06/28	NN8-14	9	d2		0	0	0	0	0	0	0	0	0	4.85436893203883	0	0	0	0	0	0	0	4.85436893203883	0	0	0	0	0	0	0	0	0	0	0	0	0	0	0	0	0	0	0	0	0	29.126213592233	0	0	38.8349514563107	0	4.85436893203883
2011/06/28	NN8-14	9	d3		0	0	0	0	0	0	0	0	0	4.95049504950495	0	0	0	0	0	0	0	4.95049504950495	0	0	0	0	0	0	0	0	0	0	0	0	0	0	0	0	0	0	0	0	0	34.6534653465347	0	0	19.8019801980198	0	0
2011/06/28	NN8-14	9	d4		0	0	0	0	0	0	0	0	0	5	0	0	0	0	0	0	0	5	0	0	0	0	0	0	0	0	0	0	0	0	0	0	0	0	0	0	0	0	0	25	0	0	30	0	0
2011/06/28	NN8-14	10	d1		0	0	0	0	0	0	0	0	0	4.85436893203883	0	0	0	2.9126213592233	0	0	0	0	0	0	0	0	0	0	0	0	0	0	0	0	0	0	0	0	0	0	0	0	0	67.9611650485437	0	0	14.5631067961165	0	0
2011/06/28	NN8-14	10	d2		0	0	0	0	0	0	0	0	0	4.71698113207547	0	0	0	0	0	0	0	0	0	0	0	0	0	0	0	0	0	0	0	0	0	0	0	0	0	0	0	0	0	66.0377358490566	0	0	9.43396226415094	0	2.83018867924528
2011/06/28	NN8-14	10	d3		0	0	0	0	0	0	0	0	0	4.95049504950495	0	0	0	0	0	0	0	2.97029702970297	0	0	0	0	0	0	0	0	0	0	0	0	0	0	0	0	0	0	0	0	0	59.4059405940594	0	0	19.8019801980198	0	0
2011/06/28	NN8-14	10	d4		0	0	0	0	0	0	0	0	0	9.9009900990099	0	0	0	0	0	0	0	4.95049504950495	0	0	0	0	0	0	0	0	0	0	0	0	0	0	0	0	0	0	0	0	0	34.6534653465347	0	0	19.8019801980198	0	2.97029702970297
2011/06/28	NN8-14	11	d1		0	0	0	0	0	0	0	0	0	10	0	0	0	0	0	0	0	0	0	0	0	0	0	0	0	0	0	0	0	0	0	0	0	0	0	0	0	0	0	60	0	0	15	0	0
2011/06/28	NN8-14	11	d2		0	0	0	0	0	0	0	0	0	4.54545454545455	0	0	0	0	0	0	0	0	0	0	0	0	0	0	0	0	0	0	0	0	0	0	4.54545454545455	0	0	0	0	0	0	54.5454545454545	0	0	9.09090909090909	0	0
2011/06/28	NN8-14	11	d3		0	0	0	0	0	0	0	0	0	4.95049504950495	0	0	0	0	0	0	0	0	0	0	0	2.97029702970297	0	0	0	0	0	0	0	0	0	0	0	0	0	0	0	0	0	54.4554455445545	0	0	14.8514851485149	0	0
2011/06/28	NN8-14	11	d4		0	0	0	0	0	0	0	0	0	5	0	0	0	0	0	0	0	0	0	0	0	0	0	0	0	0	0	0	0	0	0	0	0	0	0	0	0	0	0	30	0	0	15	0	0
2011/06/28	NN8-14	12	d1		0	0	0	0	0	0	0	0	0	10.5263157894737	0	0	0	0	0	0	0	0	0	0	0	0	0	0	0	0	0	0	0	0	0	0	0	0	0	0	0	0	0	42.1052631578947	0	0	15.7894736842105	0	0
2011/06/28	NN8-14	12	d2		0	0	0	0	0	0	0	0	0	5	0	0	0	0	0	0	0	0	0	0	0	0	0	0	0	0	0	0	0	0	0	0	0	0	0	0	0	0	0	65	0	0	10	0	0
2011/06/28	NN8-14	12	d3		0	0	0	0	0	0	0	0	0	10	0	0	0	0	0	0	0	0	0	0	0	0	0	0	0	0	0	0	0	0	0	0	0	0	0	0	0	0	0	55	0	0	15	0	0
2011/06/28	NN8-14	12	d4		0	0	0	0	0	0	0	0	0	10.2040816326531	0	0	0	0	0	0	0	0	0	0	0	0	0	0	0	0	0	0	0	0	0	0	0	0	0	0	0	0	0	30.6122448979592	0	0	30.6122448979592	0	0
2011/06/28	NN8-14	13	d1		4.85436893203883	0	0	0	0	0	0	0	0	14.5631067961165	0	0	0	0	0	0	0	0	0	0	0	0	0	0	0	0	0	0	0	0	2.9126213592233	0	0	0	0	0	0	0	0	4.85436893203883	0	0	53.3980582524272	0	0
2011/06/28	NN8-14	13	d2		0	0	0	0	0	0	0	0	0	5	0	0	0	0	0	0	0	0	0	0	0	0	0	0	0	0	0	0	0	0	0	0	15	0	0	0	0	0	0	15	0	0	35	0	0
2011/06/28	NN8-14	13	d3		2.9126213592233	0	0	0	0	0	0	0	0	9.70873786407767	0	0	0	0	0	0	0	0	0	0	0	0	0	0	0	0	0	0	0	0	0	0	0	0	14.5631067961165	0	0	0	0	9.70873786407767	0	0	38.8349514563107	0	0
2011/06/28	NN8-14	13	d4		4.95049504950495	0	0	0	0	0	0	0	0	2.97029702970297	0	0	0	0	0	0	0	0	0	0	0	0	0	0	0	0	0	0	0	0	0	0	0	0	14.8514851485149	0	0	0	0	0	0	14.8514851485149	39.6039603960396	0	0
2011/06/28	NN8-14	14	d1		0	0	0	0	0	0	0	0	0	9.70873786407767	4.85436893203883	0	0	0	0	0	0	0	0	0	0	0	0	0	0	0	0	0	0	0	2.9126213592233	0	0	0	14.5631067961165	0	0	0	0	4.85436893203883	0	0	29.126213592233	0	0
2011/06/28	NN8-14	14	d2		0	0	0	0	0	0	0	0	0	5	0	0	0	0	0	0	0	0	0	0	0	0	0	0	0	0	0	0	0	0	0	0	0	0	0	0	0	0	0	5	0	0	35	0	0
2011/06/28	NN8-14	14	d3		5	0	0	0	0	0	0	0	0	5	0	0	0	0	0	0	0	0	0	0	0	0	0	0	0	0	0	0	0	0	0	0	0	0	10	0	0	0	0	5	0	0	35	0	0
2011/06/28	NN8-14	14	d4		0	0	0	0	0	0	0	0	0	2.9126213592233	0	0	0	0	0	0	0	0	0	0	0	0	0	0	0	0	0	0	0	0	0	0	29.126213592233	0	0	0	0	0	0	4.85436893203883	0	0	29.126213592233	0	0
2011/07/04	SW	1	d1		0	0	0	0	0	0	0	0	0	1.96078431372549	0	0	0	0	0	0	0	0	0	0	0	0	0	0	0	0	0	0	0	0	0	0	0	0	0	0	0	0	0	39.2156862745098	0	0	9.80392156862745	0	0
2011/07/04	SW	1	d2		0	0	0	0	0	0	0	0	0	14.2857142857143	0	4.76190476190476	0	0	0	0	0	0	0	0	0	0	0	0	0	0	0	0	0	0	0	0	0	0	0	0	0	0	0	38.0952380952381	0	0	14.2857142857143	0	0
2011/07/04	SW	1	d3		0	0	0	0	0	0	0	0	0	20	0	0	0	5	0	0	0	0	0	0	0	0	0	0	0	0	0	0	0	0	0	0	0	0	0	0	0	0	0	40	0	0	5	0	0
2011/07/04	SW	1	d4		0	0	0	0	0	0	0	0	0	10.2040816326531	0	0	0	0	0	0	0	0	0	0	0	0	0	0	0	0	0	0	0	0	0	0	0	0	0	0	0	5.10204081632653	0	40.8163265306122	0	0	5.10204081632653	0	0
2011/07/04	SW	2	d1		0	0	0	0	0	0	0	0	0	9.70873786407767	0	4.85436893203883	0	2.9126213592233	0	0	0	0	0	0	0	0	0	0	0	0	0	0	0	0	0	0	0	0	0	0	0	0	0	24.2718446601942	0	0	9.70873786407767	0	0
2011/07/04	SW	2	d2		0	0	0	0	0	0	0	0	0	10.2040816326531	0	0	0	0	0	0	0	0	0	0	0	0	0	0	0	0	0	0	0	0	0	0	0	0	0	0	0	0	0	30.6122448979592	0	0	15.3061224489796	0	3.06122448979592
2011/07/04	SW	2	d3		0	0	0	0	0	0	0	0	0	9.09090909090909	0	4.54545454545455	0	0	0	0	0	0	0	0	0	0	0	0	0	0	0	0	0	0	0	0	0	0	0	0	0	0	0	36.3636363636364	0	0	4.54545454545455	0	1.81818181818182
2011/07/04	SW	2	d4		0	0	0	0	0	0	0	0	0	9.52380952380952	0	0	0	0	0	0	0	0	0	0	0	0	0	0	0	0	0	0	0	0	0	0	0	0	0	0	0	4.76190476190476	0	28.5714285714286	0	0	1.9047619047619	0	14.2857142857143
2011/07/04	SW	3	d1		0	0	0	0	0	0	0	0	0	9.80392156862745	0	9.80392156862745	0	4.90196078431373	0	0	0	0	0	0	0	0	0	0	0	0	0	0	0	0	0	0	0	0	0	0	0	0	0	19.6078431372549	0	0	9.80392156862745	0	1.96078431372549
2011/07/04	SW	3	d2		0	0	0	0	0	0	0	0	0	19.2307692307692	0	9.61538461538462	0	1.92307692307692	0	0	0	0	0	0	0	0	0	0	0	0	0	0	0	0	0	0	0	0	0	0	0	0	0	19.2307692307692	0	0	4.80769230769231	0	0
2011/07/04	SW	3	d3		0	0	0	0	0	0	0	0	0	5.05050505050505	0	0	0	5.05050505050505	0	0	0	0	0	0	0	0	0	0	0	0	0	0	0	0	0	0	0	0	5.05050505050505	0	0	0	0	40.4040404040404	0	0	5.05050505050505	0	0
2011/07/04	SW	3	d4		0	0	0	0	0	0	0	0	0	10	0	0	0	15	0	0	0	0	0	0	0	0	0	0	0	0	0	0	0	0	0	0	0	0	0	0	0	5	0	25	0	0	15	0	0
2011/07/04	SW	4	d1		0	0	0	0	0	0	0	0	0	14.7058823529412	0	0	0	1.96078431372549	0	0	0	0	0	0	0	0	0	0	0	0	0	0	0	0	0	0	14.7058823529412	0	0	0	0	0	0	14.7058823529412	0	0	14.7058823529412	0	0
2011/07/04	SW	4	d2		0	0	0	0	0	0	0	0	0	28.5714285714286	0	0	0	2.85714285714286	0	0	0	0	0	0	0	0	0	0	0	0	0	0	0	0	0	0	4.76190476190476	0	0	0	0	0	0	28.5714285714286	0	0	4.76190476190476	0	0
2011/07/04	SW	4	d3		0	0	0	0	0	0	0	0	0	10.2040816326531	0	0	0	3.06122448979592	0	0	0	0	0	0	0	0	0	0	0	0	0	0	0	0	0	0	10.2040816326531	0	0	0	0	0	0	30.6122448979592	0	0	5.10204081632653	0	0
2011/07/04	SW	4	d4		0	0	0	0	0	0	0	0	0	10.752688172043	0	0	0	3.2258064516129	0	0	0	0	0	0	0	0	0	0	0	0	0	0	0	0	0	0	0	0	0	0	0	0	0	32.258064516129	0	0	0	0	0
2011/07/04	SE	1	d1		0	0	0	0	0	0	0	0	0	15	0	10	0	0	0	0	0	5	0	0	0	0	0	0	0	0	0	0	0	0	0	0	0	0	0	0	0	0	0	30	0	0	0	0	0
2011/07/04	SE	1	d2		0	0	0	0	0	0	0	0	0	19.4174757281553	0	9.70873786407767	0	0	0	0	0	9.70873786407767	0	0	0	0	0	0	0	0	0	0	0	0	0	0	0	0	9.70873786407767	0	0	0	0	0	0	0	0	0	9.70873786407767
2011/07/04	SE	1	d3		0	0	0	0	0	0	0	0	0	14.1509433962264	0	9.43396226415094	0	2.83018867924528	0	0	0	18.8679245283019	0	0	0	0	0	0	0	0	0	0	0	0	0	0	0	0	0	0	0	0	0	9.43396226415094	0	0	4.71698113207547	0	9.43396226415094
2011/07/04	SE	1	d4		0	0	0	0	0	0	0	0	0	20	0	10	0	0	0	0	0	20	0	0	0	0	0	0	0	0	0	0	0	0	0	0	0	0	0	0	0	0	0	0	0	0	20	0	0
2011/07/04	SE	2	d1		0	0	0	0	0	0	0	0	0	24.2718446601942	0	9.70873786407767	0	0	0	0	0	4.85436893203883	0	0	0	0	0	0	0	0	0	0	0	0	0	0	0	0	0	0	0	0	0	9.70873786407767	0	0	0	0	4.85436893203883
2011/07/04	SE	2	d2		0	0	0	0	0	0	0	0	0	23.8095238095238	0	9.52380952380952	0	0	0	0	0	4.76190476190476	0	0	0	0	0	0	0	0	0	0	0	0	0	0	0	0	0	0	0	0	0	0	0	0	0	0	19.047619047619
2011/07/04	SE	2	d3		0	0	0	0	0	0	0	0	0	19.4174757281553	0	9.70873786407767	0	0	0	0	0	0	0	0	0	0	0	0	0	0	0	0	0	0	0	0	0	0	0	0	0	0	0	0	0	0	2.9126213592233	0	9.70873786407767
2011/07/04	SE	2	d4		0	0	0	0	0	0	0	0	0	19.4174757281553	0	9.70873786407767	0	0	0	0	0	0	0	0	0	0	0	0	0	0	0	0	0	0	0	0	0	0	0	0	0	0	0	0	0	0	0	0	0
2011/07/04	SE	3	d1		0	0	0	0	0	0	0	0	0	9.70873786407767	0	19.4174757281553	0	0	0	0	0	2.9126213592233	0	0	0	0	0	0	0	0	0	0	0	0	0	0	0	0	0	0	0	0	0	14.5631067961165	0	0	9.70873786407767	0	4.85436893203883
2011/07/04	SE	3	d2		0	0	0	0	0	0	0	0	0	15	0	30	0	0	0	0	0	5	0	0	0	0	0	0	0	0	0	0	0	0	0	0	0	0	0	0	0	0	0	0	0	0	5	0	0
2011/07/04	SE	3	d3		0	0	0	0	0	0	0	0	0	11.1111111111111	0	33.3333333333333	0	0	0	0	0	5.55555555555556	0	0	0	0	0	0	0	0	0	0	0	0	0	0	0	0	0	0	0	0	0	0	0	0	5.55555555555556	0	0
2011/07/04	SE	3	d4		0	0	0	0	0	0	0	0	0	10	0	40	0	0	0	0	0	5	0	0	0	0	0	0	0	0	0	0	0	0	0	0	0	0	0	0	0	0	0	0	0	0	5	0	0
2011/07/04	SE	4	d1		0	0	0	0	0	0	0	0	0	10	0	20	0	0	0	0	0	5	0	0	0	0	0	0	0	0	0	0	0	0	0	0	0	0	0	0	0	0	0	30	0	0	5	0	5
2011/07/04	SE	4	d2		0	0	0	0	0	0	0	0	0	14.1509433962264	0	28.3018867924528	0	2.83018867924528	0	0	0	4.71698113207547	0	0	0	0	0	0	0	0	0	0	0	0	0	0	0	0	0	0	0	0	0	4.71698113207547	0	0	9.43396226415094	0	4.71698113207547
2011/07/04	SE	4	d3		0	0	0	0	0	0	0	0	0	9.70873786407767	0	19.4174757281553	0	2.9126213592233	0	0	0	9.70873786407767	0	0	0	0	0	0	0	0	0	0	0	0	0	0	0	0	0	0	0	0	0	4.85436893203883	0	0	29.126213592233	0	0
2011/07/04	SE	4	d4		0	0	0	0	0	0	0	0	0	5	0	40	0	0	0	0	0	5	0	0	0	0	0	0	0	0	0	0	0	0	0	0	0	0	0	0	0	0	0	5	0	0	10	0	0
2011/07/07	NN1-7	1	d1		2.9126213592233	0	0	0	0	0	0	0	0	4.85436893203883	0	0	0	0	0	0	0	0	0	0	0	0	0	0	0	0	0	0	0	0	0	0	0	0	0	0	0	0	0	33.9805825242718	0	0	0	0	24.2718446601942
2011/07/07	NN1-7	1	d2		2.83018867924528	0	0	0	0	0	0	0	0	4.71698113207547	0	0	0	0	0	0	0	0	0	0	0	0	0	0	0	0	0	0	0	0	0	0	0	0	0	0	0	0	0	28.3018867924528	0	0	0	0	37.7358490566038
2011/07/07	NN1-7	1	d3		0	0	0	0	0	0	0	0	0	5.10204081632653	0	0	0	0	0	0	0	0	0	0	0	0	0	0	0	0	0	0	0	0	0	0	0	0	0	0	0	0	0	40.8163265306122	0	0	0	0	3.06122448979592
2011/07/07	NN1-7	1	d4		0	0	0	0	0	0	0	0	0	4.71698113207547	0	0	0	0	0	0	0	0	0	0	0	0	0	0	0	0	0	0	0	0	0	0	0	0	0	0	0	0	0	47.1698113207547	0	0	0	0	4.71698113207547
2011/07/07	NN1-7	2	d1		0	0	0	0	0	0	0	0	0	4.85436893203883	0	0	0	0	0	0	0	0	0	0	0	0	0	0	0	0	0	0	0	0	0	0	0	0	0	0	0	0	0	29.126213592233	0	0	0	0	4.85436893203883
2011/07/07	NN1-7	2	d2		0	0	0	0	0	0	0	0	0	15	0	0	0	0	0	0	0	0	0	0	0	0	0	0	0	0	0	0	0	0	0	0	0	0	0	0	0	0	0	10	0	0	0	0	10
2011/07/07	NN1-7	2	d3		0	0	0	0	0	0	0	0	0	15	0	0	0	0	0	0	0	0	0	0	0	0	0	0	0	0	0	0	0	0	0	0	0	0	0	0	0	0	0	40	0	0	0	0	0
2011/07/07	NN1-7	2	d4		0	0	0	0	0	0	0	0	0	5.20833333333333	0	0	0	0	0	0	0	0	0	0	0	0	0	0	0	0	0	0	0	0	0	0	0	0	0	0	0	0	0	52.0833333333333	0	0	1.04166666666667	0	0
2011/07/07	NN1-7	3	d1		0	0	0	0	0	0	0	0	0	4.95049504950495	4.95049504950495	0	0	0	0	0	0	0	0	0	0	0	0	0	0	0	0	0	0	0	0	0	0	0	0	0	0	0	0	9.9009900990099	0	0	0	0	0
2011/07/07	NN1-7	3	d2		0	0	0	0	0	0	0	0	0	4.76190476190476	4.76190476190476	0	0	0	0	0	0	0	0	0	0	0	0	0	0	0	0	0	0	0	0	0	0	0	0	0	0	0	0	9.52380952380952	0	0	4.76190476190476	0	9.52380952380952
2011/07/07	NN1-7	3	d3		0	0	0	0	0	0	0	0	0	4.71698113207547	2.83018867924528	0	0	2.83018867924528	0	0	0	0	0	0	0	0	0	0	0	0	0	0	0	0	0	0	0	0	0	0	0	0	0	28.3018867924528	0	0	0	0	9.43396226415094
2011/07/07	NN1-7	3	d4		0	0	0	0	0	0	0	0	0	9.9009900990099	2.97029702970297	0	0	0	0	0	0	0	0	0	0	0	0	0	0	0	0	0	0	0	0	0	0	0	0	0	0	0	0	44.5544554455446	0	0	4.95049504950495	0	0
2011/07/07	NN1-7	4	d1		0	0	0	0	0	0	0	0	0	8.92857142857143	0	0	0	0	0	0	0	4.46428571428571	0	0	0	0	0	0	0	0	0	0	0	0	0	0	0	0	0	0	0	0	0	13.3928571428571	0	0	0	0	2.67857142857143
2011/07/07	NN1-7	4	d2		0	0	0	0	0	0	0	0	0	4.62962962962963	0	0	0	0	2.77777777777778	0	0	18.5185185185185	0	0	0	0	0	0	0	0	0	0	0	0	0	0	0	0	0	0	0	0	0	4.62962962962963	0	0	0	0	0
2011/07/07	NN1-7	4	d3		0	0	0	0	0	0	0	0	0	14.5631067961165	0	0	0	0	2.9126213592233	0	0	9.70873786407767	0	0	0	0	0	0	0	0	0	0	0	0	0	0	0	0	0	0	0	0	0	9.70873786407767	0	0	0	0	0
2011/07/07	NN1-7	4	d4		0	0	0	0	0	0	0	0	0	9.70873786407767	0	0	0	0	0	0	0	4.85436893203883	0	0	0	0	0	0	0	0	0	0	0	0	0	0	0	0	0	0	0	0	0	38.8349514563107	0	0	9.70873786407767	0	0
2011/07/07	NN1-7	5	d1		0	0	0	0	0	0	0	0	0	21.0526315789474	0	0	0	0	0	0	0	5.26315789473684	0	0	0	0	0	0	0	0	0	0	0	0	0	0	0	0	0	0	0	0	0	10.5263157894737	0	0	0	0	0
2011/07/07	NN1-7	5	d2		0	0	0	0	0	0	0	0	0	9.52380952380952	0	0	0	0	0	0	0	9.52380952380952	0	0	0	0	0	0	0	0	0	0	0	0	0	0	0	0	0	0	0	0	0	19.047619047619	0	0	0	0	19.047619047619
2011/07/07	NN1-7	5	d3		0	0	0	0	0	0	0	0	0	9.70873786407767	0	0	0	0	0	0	0	0	19.4174757281553	0	0	0	0	0	0	0	0	0	0	0	0	0	0	0	0	0	0	0	0	29.126213592233	0	0	0	0	0
2011/07/07	NN1-7	5	d4		0	0	0	0	0	0	0	0	0	9.52380952380952	0	0	0	0	0	0	0	14.2857142857143	0	0	0	0	0	0	0	0	0	0	0	0	0	0	0	0	0	0	0	0	0	28.5714285714286	0	0	4.76190476190476	0	0
2011/07/07	NN1-7	6	d1		0	0	0	0	0	0	0	0	0	14.8514851485149	0	0	0	0	0	0	0	9.9009900990099	0	0	0	0	0	0	0	0	0	0	0	0	0	0	0	0	0	0	0	0	0	4.95049504950495	0	0	4.95049504950495	0	4.95049504950495
2011/07/07	NN1-7	6	d2		0	0	0	0	0	0	0	0	0	9.09090909090909	0	0	4.54545454545455	0	0	0	0	0	0	0	0	0	0	0	0	0	0	0	0	0	0	0	0	0	0	0	0	0	0	4.54545454545455	0	0	0	0	13.6363636363636
2011/07/07	NN1-7	6	d3		0	0	0	0	0	0	0	0	0	14.5631067961165	0	0	0	0	0	0	0	4.85436893203883	0	0	0	0	0	0	0	0	0	0	0	0	0	0	0	0	0	0	0	0	0	9.70873786407767	0	0	4.85436893203883	0	0
2011/07/07	NN1-7	6	d4		0	0	0	0	0	0	0	0	0	19.4174757281553	0	0	0	0	0	0	0	4.85436893203883	0	0	0	0	0	0	0	0	0	0	0	0	0	0	0	0	0	0	0	0	0	9.70873786407767	0	0	14.5631067961165	0	0
2011/07/07	NN1-7	7	d1		0	0	0	0	0	0	0	0	0	14.5631067961165	0	0	29.126213592233	0	0	0	0	0	0	0	0	0	0	0	0	0	0	0	0	0	0	0	0	0	0	0	0	0	0	4.85436893203883	0	0	14.5631067961165	0	0
2011/07/07	NN1-7	7	d2		0	0	0	0	0	0	0	0	0	5	0	0	40	0	0	0	0	0	0	0	0	0	0	0	0	0	0	0	0	0	0	0	0	0	0	0	0	0	0	5	0	0	5	0	0
2011/07/07	NN1-7	7	d3		0	0	0	0	0	0	0	0	0	4.76190476190476	0	0	38.0952380952381	0	0	0	0	0	0	0	0	0	0	0	0	0	0	0	0	0	0	0	0	0	0	0	0	0	0	4.76190476190476	0	0	9.52380952380952	0	4.76190476190476
2011/07/07	NN1-7	7	d4		0	0	0	0	0	0	0	0	0	10	0	0	5	0	0	0	0	10	0	0	0	0	0	0	0	0	0	0	0	0	0	0	0	0	0	0	0	0	0	20	0	0	15	0	0
2011/07/07	NN8-14	8	d1		0	0	0	0	0	0	0	0	0	13.5135135135135	0	0	0	0	0	0	0	0	0	0	0	22.5225225225225	0	0	0	0	0	0	0	0	0	0	0	0	0	0	0	0	0	9.00900900900901	0	0	18.018018018018	0	4.5045045045045
2011/07/07	NN8-14	8	d2		0	0	0	0	0	0	0	0	0	14.5631067961165	0	0	9.70873786407767	0	0	0	0	0	0	0	0	0	0	0	0	0	0	0	0	0	0	0	0	0	0	0	0	0	0	14.5631067961165	0	9.70873786407767	14.5631067961165	0	0
2011/07/07	NN8-14	8	d3		0	0	0	0	0	0	0	0	0	10.752688172043	0	0	0	0	0	0	0	5.37634408602151	0	0	0	0	0	0	0	0	0	0	0	0	0	0	0	0	0	0	0	0	0	16.1290322580645	0	10.752688172043	16.1290322580645	0	0
2011/07/07	NN8-14	8	d4		0	0	0	0	0	0	0	0	0	10	0	0	0	0	0	0	0	20	0	0	0	0	0	0	0	0	0	0	0	0	0	0	0	0	0	0	0	0	0	20	0	0	30	0	0
2011/07/13	NN8-14	9	d1		0	0	0	0	0	0	0	0	0	9.52380952380952	0	0	0	0	0	0	0	0	0	0	0	0	0	0	0	0	0	0	0	0	0	0	0	0	0	0	0	0	0	42.8571428571429	0	0	19.047619047619	0	4.76190476190476
2011/07/13	NN8-14	9	d2		0	0	0	0	0	0	0	0	0	9.9009900990099	0	0	0	0	0	0	0	4.95049504950495	0	0	0	0	0	0	0	0	0	0	0	0	0	0	0	0	0	0	0	0	0	34.6534653465347	0	0	19.8019801980198	0	4.95049504950495
2011/07/13	NN8-14	9	d3		0	0	0	0	0	0	0	0	0	5.37634408602151	0	0	0	0	0	0	0	5.37634408602151	0	0	0	0	0	0	0	0	0	0	0	0	0	0	0	0	0	0	0	0	0	37.6344086021505	0	0	16.1290322580645	0	0
2011/07/13	NN8-14	9	d4		0	0	0	0	0	0	0	0	0	9.70873786407767	0	0	0	0	0	0	0	4.85436893203883	0	0	0	0	0	0	0	0	0	0	0	0	0	0	0	0	0	0	0	0	0	19.4174757281553	0	0	24.2718446601942	0	0
2011/07/13	NN8-14	10	d1		0	0	0	0	0	0	0	0	0	4.95049504950495	0	0	0	0	0	0	0	0	0	0	0	0	0	0	0	0	0	0	0	0	0	0	0	0	0	0	0	0	0	54.4554455445545	0	0	19.8019801980198	0	1.98019801980198
2011/07/13	NN8-14	10	d2		0	0	0	0	0	0	0	0	0	5.05050505050505	0	0	0	0	0	0	0	0	0	0	0	0	0	0	0	0	0	0	0	0	0	0	0	0	0	0	0	0	0	55.5555555555556	0	0	20.2020202020202	0	0
2011/07/13	NN8-14	10	d3		0	0	0	0	0	0	0	0	0	10	0	0	0	0	0	0	0	5	0	0	0	0	0	0	0	0	0	0	0	0	0	0	0	0	0	0	0	0	0	45	0	0	15	0	0
2011/07/13	NN8-14	10	d4		0	0	0	0	0	0	0	0	0	9.34579439252336	0	0	0	0	0	0	0	4.67289719626168	0	0	0	0	0	0	0	0	0	0	0	0	0	0	0	0	0	0	0	0	0	28.0373831775701	0	0	18.6915887850467	0	1.86915887850467
2011/07/13	NN8-14	11	d1		0	0	0	0	0	0	0	0	0	5.15463917525773	0	0	0	0	0	0	0	2.06185567010309	0	0	0	0	0	0	0	0	0	0	0	0	0	0	0	0	0	0	0	0	0	51.5463917525773	0	0	10.3092783505155	0	0
2011/07/13	NN8-14	11	d2		0	0	0	0	0	0	0	0	0	4.90196078431373	0	0	0	0	0	0	0	0	0	0	0	0	0	0	0	0	0	0	0	0	0	0	4.90196078431373	0	0	0	0	0	0	53.921568627451	0	0	9.80392156862745	0	0
2011/07/13	NN8-14	11	d3		0	0	0	0	0	0	0	0	0	4.76190476190476	0	0	0	0	0	0	0	0	0	0	0	0	0	0	0	0	0	0	0	0	0	0	0	0	0	0	0	0	0	52.3809523809524	0	0	19.047619047619	0	0
2011/07/13	NN8-14	11	d4		0	0	0	0	0	0	0	0	0	4.80769230769231	0	0	0	0	0	0	0	0	0	0	0	0	0	0	0	0	0	0	0	0	0	0	0	0	0	0	0	0	0	38.4615384615385	0	0	19.2307692307692	0	0
2011/07/13	NN8-14	12	d1		0	0	0	0	0	0	0	0	0	9.80392156862745	0	0	0	0	0	0	0	0	0	0	0	0	0	0	0	0	0	0	0	0	0	0	0	0	0	0	0	0	0	44.1176470588235	0	0	24.5098039215686	0	0
2011/07/13	NN8-14	12	d2		0	0	0	0	0	0	0	0	0	5	0	0	0	0	0	0	0	0	0	0	0	0	0	0	0	0	0	0	0	0	0	0	0	0	0	0	0	0	0	60	0	0	20	0	0
2011/07/13	NN8-14	12	d3		0	0	0	0	0	0	0	0	0	4.80769230769231	0	0	0	0	0	0	0	0	0	0	0	0	0	0	0	0	0	0	0	0	0	0	0	0	0	0	0	0	0	57.6923076923077	0	0	28.8461538461538	0	1.92307692307692
2011/07/13	NN8-14	12	d4		0	0	0	0	0	0	0	0	0	2.06185567010309	0	0	0	0	0	0	0	0	0	0	0	0	0	0	0	0	0	0	0	0	0	0	0	0	0	0	0	0	0	20.6185567010309	0	0	41.2371134020619	0	0
2011/07/13	NN8-14	13	d1		0	0	0	0	0	0	0	0	0	23.8095238095238	0	0	0	0	0	0	0	0	0	0	0	0	0	0	0	0	0	0	0	0	0	0	0	0	0	0	0	0	0	14.2857142857143	0	0	47.6190476190476	0	0
2011/07/13	NN8-14	13	d2		0	0	0	0	0	0	0	0	0	14.2857142857143	0	0	0	0	0	0	0	0	0	0	0	0	0	0	0	0	0	0	0	0	0	0	9.52380952380952	0	0	0	0	0	0	28.5714285714286	0	0	38.0952380952381	0	0
2011/07/13	NN8-14	13	d3		0	0	0	0	0	0	0	0	0	13.7614678899083	0	0	0	0	0	0	0	0	0	0	0	0	0	0	0	0	0	0	0	0	0	0	0	0	13.7614678899083	0	0	0	0	27.5229357798165	0	0	32.1100917431193	0	0
2011/07/13	NN8-14	13	d4		2.02020202020202	0	0	0	0	0	0	0	0	5.05050505050505	0	0	0	2.02020202020202	0	0	0	0	0	0	0	0	0	0	0	0	0	0	0	0	0	0	0	0	15.1515151515152	0	0	0	0	5.05050505050505	0	0	60.6060606060606	0	0
2011/07/13	NN8-14	14	d1		0	0	0	0	0	0	0	0	0	5.26315789473684	0	0	0	0	0	0	0	0	0	0	0	0	0	0	0	0	0	0	0	0	0	0	0	0	5.26315789473684	0	0	0	0	5.26315789473684	0	0	42.1052631578947	0	0
2011/07/13	NN8-14	14	d2		0	0	0	0	0	0	0	0	0	10	0	0	0	5	0	0	0	0	0	0	0	0	0	0	0	0	0	0	0	0	0	0	0	0	0	0	0	0	0	5	0	0	60	0	0
2011/07/13	NN8-14	14	d3		4.90196078431373	0	0	0	0	0	0	0	0	0	0	0	0	0	0	0	0	0	0	0	0	0	0	0	0	0	0	0	0	0	0	0	0	0	9.80392156862745	0	0	0	0	4.90196078431373	0	0	68.6274509803922	0	0
2011/07/13	NN8-14	14	d4		0	0	0	0	0	0	0	0	0	1.94174757281553	0	0	0	0	0	0	0	0	0	0	0	0	0	0	0	0	0	0	0	0	0	0	29.126213592233	0	0	0	0	0	0	4.85436893203883	0	0	48.5436893203884	0	0
2011/07/13	SW	1	d1		0	0	0	0	0	0	0	0	0	13.2743362831858	0	0	0	0	0	0	0	0	0	0	0	0	0	0	0	0	0	0	0	0	0	0	0	0	0	0	0	0	0	35.3982300884956	0	0	22.1238938053097	0	1.76991150442478
2011/07/13	SW	1	d2		0	0	0	0	0	0	0	0	0	19.8019801980198	0	4.95049504950495	0	0	0	0	0	0	0	0	0	0	0	0	0	0	0	0	0	0	0	0	0	0	0	0	0	0	0	39.6039603960396	0	0	24.7524752475248	0	0
2011/07/13	SW	1	d3		0	0	0	0	0	0	0	0	0	14.8514851485149	0	0	0	1.98019801980198	0	0	0	0	0	0	0	0	0	0	0	0	0	0	0	0	0	0	0	0	0	0	0	0	0	49.5049504950495	0	0	9.9009900990099	0	0
2011/07/13	SW	1	d4		0	0	0	0	0	0	0	0	0	4.90196078431373	0	0	0	0	0	0	0	0	0	0	0	0	0	0	0	0	0	0	0	0	0	0	0	0	0	0	0	9.80392156862745	0	53.921568627451	0	4.90196078431373	9.80392156862745	0	0
2011/07/13	SW	2	d1		0	0	0	0	0	0	0	0	0	9.43396226415094	0	9.43396226415094	0	2.83018867924528	0	0	0	0	0	0	0	0	0	0	0	0	0	0	0	0	0	0	0	0	0	0	0	0	0	42.4528301886792	0	0	9.43396226415094	0	0.943396226415094
2011/07/13	SW	2	d2		0	0	0	0	0	0	0	0	0	14.7058823529412	0	0	0	0	0	0	0	0	0	0	0	0	0	0	0	0	0	0	0	0	0	0	0	0	0	0	0	0	0	44.1176470588235	0	0	9.80392156862745	0	1.96078431372549
2011/07/13	SW	2	d3		0	0	0	0	0	0	0	0	0	9.9009900990099	0	0	0	0	0	0	0	0	0	0	0	0	0	0	0	0	0	0	0	0	0	0	0	0	0	0	0	0	0	49.5049504950495	0	0	4.95049504950495	0	1.98019801980198
2011/07/13	SW	2	d4		0	0	0	0	0	0	0	0	0	9.80392156862745	0	0	0	0	0	0	0	0	0	0	0	0	0	0	0	0	0	0	0	0	0	0	0	0	0	0	0	9.80392156862745	0	29.4117647058824	0	0	4.90196078431373	0	24.5098039215686
2011/07/13	SW	3	d1		0	0	0	0	0	0	0	0	0	10	0	10	0	5	0	0	0	0	0	0	0	0	0	0	0	0	0	0	0	0	0	0	0	0	0	0	0	0	0	30	0	0	10	0	0
2011/07/13	SW	3	d2		0	0	0	0	0	0	0	0	0	20.4081632653061	0	5.10204081632653	0	2.04081632653061	0	0	0	0	0	0	0	0	0	0	0	0	0	0	0	0	0	0	0	0	0	0	0	0	0	30.6122448979592	0	0	2.04081632653061	0	0
2011/07/13	SW	3	d3		0	0	0	0	0	0	0	0	0	9.1743119266055	0	0	0	1.8348623853211	0	0	0	0	0	0	0	0	0	0	0	0	0	0	0	0	0	0	0	0	4.58715596330275	0	0	0	0	55.045871559633	0	0	1.8348623853211	0	0.917431192660551
2011/07/13	SW	3	d4		0	0	0	0	0	0	0	0	0	9.9009900990099	0	4.95049504950495	0	9.9009900990099	0	0	0	0	0	0	0	0	0	0	0	0	0	0	0	0	0	0	0	0	0	0	0	4.95049504950495	0	39.6039603960396	0	0	9.9009900990099	0	0.99009900990099
2011/07/13	SW	4	d1		0	0	0	0	0	0	0	0	0	9.61538461538462	0	0	0	1.92307692307692	0	0	0	0	0	0	0	0	0	0	0	0	0	0	0	0	0	0	28.8461538461538	0	0	0	0	0	0	24.0384615384615	0	0	4.80769230769231	0	1.92307692307692
2011/07/13	SW	4	d2		0	0	0	0	0	0	0	0	0	30.6122448979592	0	0	0	3.06122448979592	0	0	0	0	0	0	0	0	0	0	0	0	0	0	0	0	0	0	0	0	0	0	0	0	0	40.8163265306122	0	0	2.04081632653061	0	1.02040816326531
2011/07/13	SW	4	d3		0	0	0	0	0	0	0	0	0	14.7058823529412	0	0	0	0	0	0	0	0	0	0	0	0	0	0	0	0	0	0	0	0	0	0	4.90196078431373	0	4.90196078431373	0	0	0	0	39.2156862745098	0	0	4.90196078431373	0	0
2011/07/13	SW	4	d4		0	0	0	0	0	0	0	0	0	19.8019801980198	0	0	0	0	0	0	0	0	0	0	0	0	0	0	0	0	0	0	0	0	0	0	0	0	0	0	0	0	0	44.5544554455446	0	0	9.9009900990099	0	0.99009900990099
2011/07/13	SE	1	d1		0	0	0	0	0	0	0	0	0	9.80392156862745	0	24.5098039215686	0	0	0	0	0	4.90196078431373	0	0	0	0	0	0	0	0	0	0	0	0	0	0	0	0	0	0	0	0	0	24.5098039215686	0	0	0	0	0
2011/07/13	SE	1	d2		0	0	0	0	0	0	0	0	0	20.6185567010309	0	25.7731958762887	0	0	0	0	0	5.15463917525773	0	0	0	0	0	0	0	0	0	0	0	0	0	0	0	0	5.15463917525773	0	0	0	0	5.15463917525773	0	0	0	0	10.3092783505155
2011/07/13	SE	1	d3		0	0	0	0	0	0	0	0	0	26.5957446808511	0	21.2765957446809	0	2.12765957446809	0	0	0	5.31914893617021	0	0	0	0	0	0	0	0	0	0	0	0	0	0	0	0	0	0	0	0	0	10.6382978723404	0	0	0	0	10.6382978723404
2011/07/13	SE	1	d4		0	0	0	0	0	0	0	0	0	18.8679245283019	0	14.1509433962264	0	0	0	0	0	4.71698113207547	0	0	0	0	0	0	0	0	0	0	0	0	0	0	0	0	0	0	0	0	0	0	0	0	28.3018867924528	0	1.88679245283019
2011/07/13	SE	2	d1		0	0	0	0	0	0	0	0	0	28.8461538461538	0	9.61538461538462	0	0	0	0	0	0	0	0	0	0	0	0	0	0	0	0	0	0	0	0	0	0	0	0	0	0	0	4.80769230769231	0	0	4.80769230769231	0	0
2011/07/13	SE	2	d2		0	0	0	0	0	0	0	0	0	15.4639175257732	0	20.6185567010309	0	0	0	0	0	0	0	0	0	0	0	0	0	0	0	0	0	0	0	0	0	0	0	0	0	0	0	0	0	0	0	0	10.3092783505155
2011/07/13	SE	2	d3		0	0	0	0	0	0	0	0	0	20	0	25	0	0	0	0	0	0	0	0	0	0	0	0	0	0	0	0	0	0	0	0	0	0	0	0	0	0	0	0	0	0	5	0	5
2011/07/13	SE	2	d4		0	0	0	0	0	0	0	0	0	34.3137254901961	0	9.80392156862745	0	0	0	0	0	0	0	0	0	0	0	0	0	0	0	0	0	0	0	0	0	0	0	0	0	0	0	4.90196078431373	0	0	0	0	0
2011/07/13	SE	3	d1		0	0	0	0	0	0	0	0	0	14.018691588785	0	18.6915887850467	0	0	0	0	0	4.67289719626168	0	0	0	0	0	0	0	0	0	0	0	0	0	0	0	0	0	0	0	0	0	0	0	0	9.34579439252336	0	4.67289719626168
2011/07/13	SE	3	d2		0	0	0	0	0	0	0	0	0	4.95049504950495	0	39.6039603960396	0	0	0	0	0	4.95049504950495	0	0	0	0	0	0	0	0	0	0	0	0	0	0	0	0	1.98019801980198	0	0	0	0	0	0	0	4.95049504950495	0	4.95049504950495
2011/07/13	SE	3	d3		0	0	0	0	0	0	0	0	0	4.90196078431373	0	34.3137254901961	0	0	0	0	0	4.90196078431373	0	0	0	0	0	0	0	0	0	0	0	0	0	0	0	0	0	0	0	0	0	0	0	0	9.80392156862745	0	0
2011/07/13	SE	3	d4		0	0	0	0	0	0	0	0	0	12.0967741935484	0	24.1935483870968	0	0	0	0	0	4.03225806451613	0	0	0	0	0	0	0	0	0	0	0	0	0	0	0	0	0	0	0	0	0	0	0	0	8.06451612903226	0	0
2011/07/13	SE	4	d1		0	0	0	0	0	0	0	0	0	18.348623853211	0	36.697247706422	0	0	0	0	0	0	0	0	0	0	0	0	0	0	0	0	0	0	0	0	0	0	0	0	0	0	0	0	0	0	4.58715596330275	0	0
2011/07/13	SE	4	d2		0	0	0	0	0	0	0	0	0	17.6991150442478	0	26.5486725663717	0	0	0	0	0	8.84955752212389	0	0	0	0	0	0	0	0	0	0	0	0	0	0	0	0	0	0	0	0	0	0	0	0	26.5486725663717	0	1.76991150442478
2011/07/13	SE	4	d3		0	0	0	0	0	0	0	0	0	29.7029702970297	0	29.7029702970297	0	0	0	0	0	1.98019801980198	0	0	0	0	0	0	0	0	0	0	0	0	0	0	0	0	0	0	0	0	0	1.98019801980198	0	0	4.95049504950495	0	4.95049504950495
2011/07/13	SE	4	d4		0	0	0	0	0	0	0	0	0	18.8679245283019	0	18.8679245283019	0	0	0	0	0	0	0	0	0	0	0	0	0	0	0	0	0	0	0	0	0	0	0	0	0	0	0	14.1509433962264	0	0	18.8679245283019	0	1.88679245283019
2011/07/23	NN1-7	1	d1		2.9126213592233	0	0	0	0	0	0	0	0	4.85436893203883	0	0	0	0	0	0	0	0	0	0	0	0	0	0	0	0	0	0	0	0	0	0	0	0	0	0	0	0	0	24.2718446601942	0	0	4.85436893203883	0	19.4174757281553
2011/07/23	NN1-7	1	d2		2.9126213592233	0	0	0	0	0	0	0	0	4.85436893203883	0	0	0	0	0	0	0	0	0	0	0	0	0	0	0	0	0	0	0	0	0	0	0	0	0	0	0	0	0	33.9805825242718	0	0	0	0	9.70873786407767
2011/07/23	NN1-7	1	d3		0	0	0	0	0	0	0	0	0	10.8695652173913	0	0	0	0	0	0	0	0	0	0	0	0	0	0	0	0	0	0	0	0	0	0	0	0	0	0	0	0	0	43.4782608695652	0	0	0	0	0
2011/07/23	NN1-7	1	d4		0	0	0	0	0	0	0	0	0	4.80769230769231	0	0	0	0	0	0	0	0	0	0	0	0	0	0	0	0	0	0	0	0	0	0	0	0	0	0	0	0	0	38.4615384615385	0	0	1.92307692307692	0	4.80769230769231
2011/07/23	NN1-7	2	d1		0	0	0	0	0	0	0	0	0	3.09278350515464	0	0	0	0	0	0	0	0	0	0	0	0	0	0	0	0	0	0	0	0	0	0	0	0	0	0	0	0	0	36.0824742268041	0	0	2.06185567010309	0	0
2011/07/23	NN1-7	2	d2		0	0	0	0	0	0	0	0	0	24.5098039215686	0	0	0	0	0	0	0	0	0	0	0	0	0	0	0	0	0	0	0	0	0	0	0	0	0	0	0	0	0	9.80392156862745	0	0	1.96078431372549	0	4.90196078431373
2011/07/23	NN1-7	2	d3		0	0	0	0	0	0	0	0	0	23.1481481481481	0	0	0	0	0	0	0	0	0	0	0	0	0	0	0	0	0	0	0	0	0	0	0	0	0	0	0	0	0	32.4074074074074	0	0	0	0	9.25925925925926
2011/07/23	NN1-7	2	d4		0	0	0	0	0	0	0	0	0	5.05050505050505	0	0	0	0	0	0	0	0	0	0	0	0	0	0	0	0	0	0	0	0	0	0	0	0	0	0	0	0	0	35.3535353535354	0	0	1.01010101010101	0	2.02020202020202
2011/07/23	NN1-7	3	d1		0	0	0	0	0	0	0	0	0	4.90196078431373	0	0	0	0	0	0	0	4.90196078431373	0	0	0	0	0.980392156862745	0	0	0	0	0	0	0	0	0	0	0	0	0	0	0	0	9.80392156862745	0	4.90196078431373	0	0	0
2011/07/23	NN1-7	3	d2		0	0	0	0	0	0	0	0	0	5.26315789473684	0	0	0	0	0	0	0	5.26315789473684	0	0	0	0	0	0	0	0	0	0	0	0	0	0	0	0	0	0	0	0	0	10.5263157894737	0	0	2.10526315789474	0	0
2011/07/23	NN1-7	3	d3		0	0	0	0	0	0	0	0	0	4.85436893203883	0	0	0	0	0	0	0	4.85436893203883	0	0	0	0	0	0	0	0	0	0	0	0	0	0	0	0	0	0	0	0	0	29.126213592233	0	0	0	0	4.85436893203883
2011/07/23	NN1-7	3	d4		0.961538461538462	0	0	0	0	0	0	0	0	4.80769230769231	0	0	0	0	0	0	0	0	0	0	0	0	0	0	0	0	0	0	0	0	0	0	0	0	0	0	0	0	0	28.8461538461538	0	0	0	0	4.80769230769231
2011/07/23	NN1-7	4	d1		0	0	0	0	0	0	0	0	0	9.52380952380952	0	0	0	0	0	0	0	4.76190476190476	0	0	0	0	0	0	0	0	0	0	0	0	0	0	0	0	0	0	0	0	0	4.76190476190476	0	0	0	0	0
2011/07/23	NN1-7	4	d2		0	0	0	0	0	0	0	0	0	4.95049504950495	0	0	0	0	0	0	0	9.9009900990099	0	0	0	0	0	0	0	0	0	0	0	0	0	0	0	0	0	0	0	0	0	4.95049504950495	0	0	0	0	0
2011/07/23	NN1-7	4	d3		0	0	0	0	0	0	0	0	0	4.95049504950495	0	0	0	0	0	0	0	9.9009900990099	0	0	0	0	0	0	0	0	0	0	0	0	0	0	0	0	0	0	0	0	0	9.9009900990099	0	0	0	0	0
2011/07/23	NN1-7	4	d4		0	0	0	0	0	0	0	0	0	10	0	0	0	0	0	0	0	10	0	0	0	0	0	0	0	0	0	0	0	0	0	0	0	0	0	0	0	0	0	20	0	0	10	0	5
2011/07/23	NN1-7	5	d1		0	0	0	0	0	0	0	0	0	19.8019801980198	0	0	0	0	0	0	0	4.95049504950495	0	0	0	0	0	0	0	0	0	0	0	0	0	0	0	0	0	0	0	0	0	9.9009900990099	0	0	0	0	0
2011/07/23	NN1-7	5	d2		0	0	0	0	0	0	0	0	0	5	0	0	0	0	0	0	0	10	0	0	0	0	0	0	0	0	0	0	0	0	0	0	0	0	0	0	0	0	0	5	0	0	0	0	10
2011/07/23	NN1-7	5	d3		0	0	0	0	0	0	0	0	0	5	0	0	0	0	0	0	0	20	0	0	0	0	0	0	0	0	0	0	0	0	0	0	0	0	0	0	0	0	0	15	0	0	0	0	0
2011/07/23	NN1-7	5	d4		0	0	0	0	0	0	0	0	0	10	0	0	0	0	0	0	0	10	0	0	0	0	0	0	0	0	0	0	0	0	0	0	0	0	0	0	0	0	0	25	0	0	0	0	0
2011/07/23	NN1-7	6	d1		0	0	0	0	0	0	0	0	0	19.6078431372549	0	0	0	0	0	0	0	9.80392156862745	0	0	0	0	0	0	0	0	0	0	0	0	0	0	0	0	0	0	0	0	0	14.7058823529412	0	0	4.90196078431373	0	0
2011/07/23	NN1-7	6	d2		0	0	0	0	0	0	0	0	0	4.90196078431373	0	0	0	0	0	0	0	0	0	0	0	0	0	0	0	0	0	0	0	0	0	0	0	0	0	0	0	0	0	4.90196078431373	0	0	0	0	19.6078431372549
2011/07/23	NN1-7	6	d3		0	0	0	0	0	0	0	0	0	9.80392156862745	0	0	0	0	0	0	0	4.90196078431373	0	0	0	0	0	0	0	0	0	0	0	0	0	0	0	0	0	0	0	0	0	9.80392156862745	0	0	4.90196078431373	0	0
2011/07/23	NN1-7	6	d4		0	0	0	0	0	0	0	0	0	9.80392156862745	0	0	0	0	0	0	0	4.90196078431373	0	0	0	0	0	0	0	0	0	0	0	0	0	0	0	0	0	0	0	0	0	19.6078431372549	0	0	19.6078431372549	0	0
2011/07/23	NN1-7	7	d1		0	0	0	0	0	0	0	0	0	9.70873786407767	0	0	24.2718446601942	0	0	0	0	0	0	0	0	0	0	0	0	0	0	0	0	0	0	0	0	0	0	0	0	0	0	4.85436893203883	0	0	9.70873786407767	0	1.94174757281553
2011/07/23	NN1-7	7	d2		0	0	0	0	0	0	0	0	0	1.94174757281553	0	0	29.126213592233	0	0	0	0	0	0	0	0	0	0	0	0	0	0	0	0	0	0	0	0	0	0	0	0	0	0	0	0	0	9.70873786407767	0	0
2011/07/23	NN1-7	7	d3		0	0	0	0	0	0	0	0	0	4.85436893203883	0	0	33.9805825242718	0	0	0	0	0	0	0	0	0	0	0	0	0	0	0	0	0	0	0	0	0	0	0	0	0	0	9.70873786407767	0	0	9.70873786407767	0	9.70873786407767
2011/07/23	NN1-7	7	d4		0	0	0	0	0	0	0	0	0	4.67289719626168	0	0	18.6915887850467	0	0	0	0	9.34579439252336	0	0	0	0	0	0	0	0	0	0	0	0	0	0	0	0	0	0	0	0	0	18.6915887850467	0	0	18.6915887850467	0	0
2011/07/23	NN8-14	8	d1		0	0	0	0	0	0	0	0	0	14.5631067961165	0	0	0	0	0	0	0	0	0	0	0	14.5631067961165	0	0	0	0	0	0	0	0	0	0	0	0	0	0	0	0	0	0	0	0	14.5631067961165	0	9.70873786407767
2011/07/23	NN8-14	8	d2		0	0	0	0	0	0	0	0	0	15	0	0	10	0	0	0	0	0	0	0	0	0	0	0	0	0	0	0	0	0	0	0	0	0	0	0	0	0	0	10	0	10	10	0	0
2011/07/23	NN8-14	8	d3		0	0	0	0	0	0	0	0	0	4.76190476190476	0	0	9.52380952380952	0	0	0	0	0	0	0	0	0	0	0	0	0	0	0	0	0	0	0	0	0	0	0	0	0	0	23.8095238095238	0	0	4.76190476190476	0	9.52380952380952
2011/07/23	NN8-14	8	d4		0	0	0	0	0	0	0	0	0	9.80392156862745	0	0	0	0	0	0	0	19.6078431372549	0	0	0	0	0	0	0	0	0	0	0	0	0	0	0	0	0	0	0	0	0	24.5098039215686	0	0	19.6078431372549	0	0.980392156862745
2011/07/23	NN8-14	9	d1		0	0	0	0	0	0	0	0	0	10	0	0	0	0	0	0	0	0	0	0	0	0	0	0	0	0	0	0	0	0	0	0	0	0	0	0	0	0	0	45	0	0	15	0	5
2011/07/23	NN8-14	9	d2		0	0	0	0	0	0	0	0	0	10	0	0	0	0	0	0	0	0	0	0	0	0	0	0	0	0	0	0	0	0	0	0	0	0	0	0	0	0	0	35	0	0	20	0	10
2011/07/23	NN8-14	9	d3		0	0	0	0	0	0	0	0	0	4.90196078431373	0	0	0	0	0	0	0	4.90196078431373	0	0	0	0	0	0	0	0	0	0	0	0	0	0	0	0	0	0	0	0	0	49.0196078431373	0	0	19.6078431372549	0	0
2011/07/23	NN8-14	9	d4		0	0	0	0	0	0	0	0	0	10	0	0	0	0	0	0	0	5	0	0	0	0	0	0	0	0	0	0	0	0	0	0	0	0	0	0	0	0	0	35	0	0	15	0	0
2011/07/23	NN8-14	10	d1		0	0	0	0	0	0	0	0	0	4.71698113207547	0	0	0	0	0	0	0	0	0	0	0	0	0	0	0	0	0	0	0	0	0	0	0	0	0	0	0	0	0	56.6037735849057	0	0	18.8679245283019	0	0
2011/07/23	NN8-14	10	d2		0	0	0	0	0	0	0	0	0	4.80769230769231	0	0	0	0	0	0	0	1.92307692307692	0	0	0	0	0	0	0	0	0	0	0	0	0	0	0	0	0	0	0	0	0	57.6923076923077	0	0	19.2307692307692	0	1.92307692307692
2011/07/23	NN8-14	10	d3		0	0	0	0	0	0	0	0	0	5	0	0	0	0	0	0	0	5	0	0	0	0	0	0	0	0	0	0	0	0	0	0	0	0	0	0	0	0	0	55	0	0	15	0	0
2011/07/23	NN8-14	10	d4		0	0	0	0	0	0	0	0	0	9.80392156862745	0	0	0	0	0	0	0	4.90196078431373	0	0	0	0	0	0	0	0	0	0	0	0	0	0	0	0	0	0	0	0	0	39.2156862745098	0	0	19.6078431372549	0	1.96078431372549
2011/07/23	NN8-14	11	d1		0	0	0	0	0	0	0	0	0	2.88461538461538	0	0	0	0	0	0	0	0	0	0	0	0	0	0	0	0	0	0	0	0	0	0	0	0	0	0	0	0	0	62.5	0	0	14.4230769230769	0	0
2011/07/23	NN8-14	11	d2		0	0	0	0	0	0	0	0	0	4.85436893203883	0	0	0	0	0	0	0	1.94174757281553	0	0	0	0	0	0	0	0	0	0	0	0	0	0	9.70873786407767	0	0	0	0	0	0	63.1067961165049	0	0	4.85436893203883	0	0
2011/07/23	NN8-14	11	d3		0	0	0	0	0	0	0	0	0	5	0	0	0	0	0	0	0	0	0	0	0	5	0	0	0	0	0	0	0	0	0	0	0	0	0	0	0	0	0	65	0	0	15	0	0
2011/07/23	NN8-14	11	d4		0	0	0	0	0	0	0	0	0	2.9126213592233	0	0	0	0	0	0	0	0	0	0	0	0	0	0	0	0	0	0	0	0	0	0	0	0	0	0	0	0	0	38.8349514563107	0	0	14.5631067961165	0	0
2011/07/23	NN8-14	12	d1		0	0	0	0	0	0	0	0	0	4.90196078431373	0	0	0	0	0	0	0	0	0	0	0	0	0	0	0	0	0	0	0	0	0	0	0	0	0	0	0	0	0	58.8235294117647	0	0	19.6078431372549	0	0
2011/07/23	NN8-14	12	d2		0	0	0	0	0	0	0	0	0	3.03030303030303	0	0	0	0	0	0	0	0	0	0	0	0	0	0	0	0	0	0	0	0	0	0	0	0	0	0	0	0	0	75.7575757575758	0	0	5.05050505050505	0	0
2011/07/23	NN8-14	12	d3		0	0	0	0	0	0	0	0	0	9.34579439252336	0	0	0	0	0	0	0	4.67289719626168	0	0	0	0	0	0	0	0	0	0	0	0	0	0	0	0	0	0	0	0	0	65.4205607476635	0	0	9.34579439252336	0	0
2011/07/23	NN8-14	12	d4		0	0	0	0	0	0	0	0	0	20	0	0	0	0	0	0	0	0	0	0	0	0	0	0	0	0	0	0	0	0	0	0	0	0	0	0	0	0	0	30	0	0	35	0	0
2011/07/23	NN8-14	13	d1		0	0	0	0	0	0	0	0	0	29.126213592233	0	0	0	0	0	0	0	1.94174757281553	0	0	0	0	0	0	0	0	0	0	0	0	2.9126213592233	0	0	0	2.9126213592233	0	0	0	0	24.2718446601942	0	0	29.126213592233	0	0
2011/07/23	NN8-14	13	d2		0	0	0	0	0	0	0	0	0	15	0	0	0	0	0	0	0	0	0	0	0	0	0	0	0	0	0	0	0	0	0	0	10	0	5	0	0	0	0	35	0	0	30	0	0
2011/07/23	NN8-14	13	d3		0	0	0	0	0	0	0	0	0	4.58715596330275	0	0	0	0	0	0	0	9.1743119266055	0	0	0	0	0	0	0	0	0	0	0	0	0	0	0	0	18.348623853211	0	0	0	0	22.9357798165138	0	0	27.5229357798165	0	1.8348623853211
2011/07/23	NN8-14	13	d4		4.76190476190476	0	0	0	0	0	0	0	0	0	0	0	0	0	0	0	0	9.52380952380952	0	0	0	0	0	0	0	0	0	0	0	0	0	0	0	0	19.047619047619	0	0	0	0	4.76190476190476	9.52380952380952	0	38.0952380952381	0	0
2011/07/23	NN8-14	14	d1		0	0	0	0	0	0	0	0	0	4.95049504950495	0	0	0	0	0	0	0	0	0	0	0	0	0	0	0	0	0	0	0	0	4.95049504950495	0	0	0	14.8514851485149	0	0	0	0	4.95049504950495	0	0	49.5049504950495	0	0
2011/07/23	NN8-14	14	d2		0	0	0	0	0	0	0	0	0	4.80769230769231	0	0	0	0	0	0	0	0	0	0	0	0	0	0	0	0	0	0	0	0	0	0	0	0	0	0	0	0	0	4.80769230769231	0	0	76.9230769230769	0	0.961538461538462
2011/07/23	NN8-14	14	d3		4.90196078431373	0	0	0	0	0	0	0	0	0	0	0	0	0	0	0	0	0	0	0	0	0	0	0	0	0	0	0	0	0	0	0	0	0	9.80392156862745	0	0	0	0	4.90196078431373	0	0	68.6274509803922	0	0
2011/07/23	NN8-14	14	d4		0	0	0	0	0	0	0	0	0	0	0	0	0	0	0	0	0	0	0	0	0	0	0	0	0	0	0	0	0	0	0	0	27.7777777777778	0	0	0	0	0	0	9.25925925925926	9.25925925925926	0	32.4074074074074	0	0
2011/07/26	SW	1	d1		0	0	0	0	0	0	0	0	0	10.1010101010101	0	0	0	0	0	0	0	0	0	0	0	0	0	0	0	0	0	0	0	0	0	0	0	0	0	0	0	0	0	45.4545454545455	0	0	20.2020202020202	0	2.02020202020202
2011/07/26	SW	1	d2		0	0	0	0	0	0	0	0	0	14.7058823529412	0	4.90196078431373	0	0.980392156862745	0	0	0	0	0	0	0	0	0	0	0	0	0	0	0	0	0	0	0	0	0	0	0	0	0	58.8235294117647	0	0	9.80392156862745	0	0.980392156862745
2011/07/26	SW	1	d3		0	0	0	0	0	0	0	0	0	14.8514851485149	0	2.97029702970297	0	4.95049504950495	0	0	0	0	0	0	0	0	0	0	0	0	0	0	0	0	0	0	0	0	0	0	0	0	0	54.4554455445545	0	0	4.95049504950495	0	0
2011/07/26	SW	1	d4		0	0	0	0	0	0	0	0	0	10	0	3	0	0	0	0	0	0	0	0	0	0	0	0	0	0	0	0	0	0	0	0	0	0	0	0	0	5	0	60	0	5	5	0	0
2011/07/26	SW	2	d1		0	0	0	0	0	0	0	0	0	8.84955752212389	0	13.2743362831858	0	2.65486725663717	0	0	0	0	0	0	0	0	0	0	0	0	0	0	0	0	0	0	0	0	0	0	0	0	0	30.9734513274336	0	0	8.84955752212389	0	1.76991150442478
2011/07/26	SW	2	d2		0	0	0	0	0	0	0	0	0	14.2857142857143	0	4.76190476190476	0	0	0	0	0	0	0	0	0	0	0	0	0	0	0	0	0	0	0	0	0	0	0	0	0	0	0	42.8571428571429	0	0	4.76190476190476	0	2.85714285714286
2011/07/26	SW	2	d3		0	0	0	0	0	0	0	0	0	4.58715596330275	0	9.1743119266055	0	2.75229357798165	0	0	0	0	0	0	0	0	0	0	0	0	0	0	0	0	0	0	0	0	0	0	0	0	0	36.697247706422	0	0	2.75229357798165	0	1.8348623853211
2011/07/26	SW	2	d4		0	0	0	0	0	0	0	0	0	4.90196078431373	0	0	0	0	0	0	0	0	0	0	0	0	0	0	0	0	0	0	0	0	0	0	0	0	0	0	0	4.90196078431373	0	34.3137254901961	0	0	4.90196078431373	0	29.4117647058824
2011/07/26	SW	3	d1		0	0	0	0	0	0	0	0	0	9.00900900900901	0	4.5045045045045	0	4.5045045045045	0	0	0	0	0	0	0	0	0	0	0	0	0	0	0	0	0	0	0	0	0	0	0	0	0	31.5315315315315	0	0	9.00900900900901	0	2.7027027027027
2011/07/26	SW	3	d2		0	0	0	0	0	0	0	0	0	19.2307692307692	0	9.61538461538462	0	2.88461538461538	0	0	0	0	0	0	0	0	0	0	0	0	0	0	0	0	0	0	0	0	0	0	0	0	0	28.8461538461538	0	0	2.88461538461538	0	0
2011/07/26	SW	3	d3		0	0	0	0	0	0	0	0	0	9.52380952380952	0	4.76190476190476	0	2.85714285714286	0	0	0	0	0	0	0	0	0	0	0	0	0	0	0	0	0	0	0	0	0	0	0	0	0	57.1428571428571	0	0	1.9047619047619	0	0
2011/07/26	SW	3	d4		0	0	0	0	0	0	0	0	0	5.15463917525773	0	0	0	10.3092783505155	0	0	0	0	0	0	0	0	0	0	0	0	0	0	0	0	0	0	0	0	0	0	0	5.15463917525773	0	46.3917525773196	0	0	10.3092783505155	0	2.06185567010309
2011/07/26	SW	4	d1		0	0	0	0	0	0	0	0	0	4.80769230769231	0	0	0	0	0	0	0	0	0	0	0	0	0	0	0	0	0	0	0	0	0	0	28.8461538461538	0	0	0	0	0	0	19.2307692307692	0	0	1.92307692307692	0	4.80769230769231
2011/07/26	SW	4	d2		0	0	0	0	0	0	0	0	0	39.6039603960396	0	0	0	2.97029702970297	0	0	0	0	0	0	0	0	0	0	0	0	0	0	0	0	0	0	4.95049504950495	0	0	0	0	0	0	24.7524752475248	0	0	2.97029702970297	0	1.98019801980198
2011/07/26	SW	4	d3		0	0	0	0	0	0	0	0	0	14.7058823529412	0	0	0	2.94117647058824	0	0	0	0	0	0	0	0	0	0	0	0	0	0	0	0	0	0	9.80392156862745	0	2.94117647058824	0	0	0	0	39.2156862745098	0	0	2.94117647058824	0	0
2011/07/26	SW	4	d4		0	0	0	0	0	0	0	0	0	19.6078431372549	0	0	0	1.96078431372549	0	0	0	0	0	0	0	0	0	0	0	0	0	0	0	0	0	0	0	0	0	0	0	0	0	39.2156862745098	0	0	4.90196078431373	0	1.96078431372549
2011/07/26	SE	1	d1		0	0	0	0	0	0	0	0	0	4.95049504950495	0	19.8019801980198	0	0	0	0	0	4.95049504950495	0	0	0	0	0	0	0	0	0	0	0	0	0	0	0	0	0	0	0	0	0	29.7029702970297	2.97029702970297	0	0	0	0
2011/07/26	SE	1	d2		0	0	0	0	0	0	0	0	0	10.3092783505155	0	15.4639175257732	0	0	0	0	0	10.3092783505155	0	0	0	0	0	0	0	0	0	0	0	0	0	0	0	0	2.06185567010309	0	0	0	0	5.15463917525773	0	0	0	0	10.3092783505155
2011/07/26	SE	1	d3		0	0	0	0	0	0	0	0	0	23.1481481481481	0	13.8888888888889	0	4.62962962962963	0	0	0	18.5185185185185	0	0	0	0	0	0	0	0	0	0	0	0	0	0	0	0	0	0	0	0	0	9.25925925925926	2.77777777777778	0	0	0	9.25925925925926
2011/07/26	SE	1	d4		0	0	0	0	0	0	0	0	0	20.4081632653061	0	10.2040816326531	0	0	0	0	0	0	0	0	0	0	0	0	0	0	0	0	0	0	0	0	0	0	0	0	0	0	0	5.10204081632653	3.06122448979592	0	20.4081632653061	0	10.2040816326531
2011/07/26	SE	2	d1		0	0	0	0	0	0	0	0	0	37.2340425531915	0	10.6382978723404	0	0	0	0	0	5.31914893617021	0	0	0	0	0	0	0	0	0	0	0	0	0	0	0	0	0	0	0	0	0	15.9574468085106	0	0	2.12765957446809	0	0
2011/07/26	SE	2	d2		0	0	0	0	0	0	0	0	0	35	0	20	0	0	0	0	0	0	0	0	0	0	0	0	0	0	0	0	0	0	0	0	0	0	0	0	0	0	0	10	0	0	0	0	15
2011/07/26	SE	2	d3		0	0	0	0	0	0	0	0	0	34.3137254901961	0	19.6078431372549	0	0	0	0	0	0	0	0	0	0	0	0	0	0	0	0	0	0	0	0	0	0	0	0	0	0	0	4.90196078431373	0	0	1.96078431372549	0	9.80392156862745
2011/07/26	SE	2	d4		0	0	0	0	0	0	0	0	0	34.3137254901961	0	14.7058823529412	0	0	0	0	0	0	0	0	0	0	0	0	0	0	0	0	0	0	0	0	0	0	0	0	0	0	0	14.7058823529412	0	0	0.980392156862745	0	0
2011/07/26	SE	3	d1		0	0	0	0	0	0	0	0	0	15.4639175257732	0	15.4639175257732	0	0	0	0	0	2.06185567010309	0	0	0	0	0	0	0	0	0	0	0	0	0	0	0	0	0	0	0	0	0	20.6185567010309	0	0	5.15463917525773	0	5.15463917525773
2011/07/26	SE	3	d2		0	0	0	0	0	0	0	0	0	15	0	15	0	0	0	0	0	5	0	0	0	0	0	0	0	0	0	0	0	0	0	0	0	0	0	0	0	0	0	10	0	0	5	0	0
2011/07/26	SE	3	d3		0	0	0	0	0	0	0	0	0	9.25925925925926	0	27.7777777777778	0	0	0	0	0	13.8888888888889	0	0	0	0	0	0	0	0	0	0	0	0	0	0	0	0	0	0	0	0	0	4.62962962962963	0	0	4.62962962962963	0	0
2011/07/26	SE	3	d4		0	0	0	0	0	0	0	0	0	25	0	15	0	0	0	0	0	0	0	0	0	0	0	0	0	0	0	0	0	0	0	0	0	0	0	0	0	0	0	5	0	0	5	0	0
2011/07/26	SE	4	d1		0	0	0	0	0	0	0	0	0	18.8679245283019	0	4.71698113207547	0	0	0	0	0	4.71698113207547	0	0	0	0	0	0	0	0	0	0	0	0	0	0	0	0	0	0	0	0	0	18.8679245283019	0	0	0	0	2.83018867924528
2011/07/26	SE	4	d2		0	0	0	0	0	0	0	0	0	41.2371134020619	0	15.4639175257732	0	0	0	0	0	5.15463917525773	0	0	0	0	0	0	0	0	0	0	0	0	0	0	0	0	0	0	0	0	0	2.06185567010309	0	0	10.3092783505155	0	0
2011/07/26	SE	4	d3		0	0	0	0	0	0	0	0	0	20	0	20	0	0	0	0	0	10	0	0	0	0	0	0	0	0	0	0	0	0	0	0	0	0	0	0	0	0	0	5	0	0	20	0	0
2011/07/26	SE	4	d4		0	0	0	0	0	0	0	0	0	19.6078431372549	0	19.6078431372549	0	0	0	0	0	1.96078431372549	0	0	0	0	0	0	0	0	0	0	0	0	0	0	0	0	0	0	0	0	0	4.90196078431373	0	0	9.80392156862745	0	0
2011/08/17	NN1-7	1	d1		0	0	0	5	0	0	0	0	0	0	0	0	0	0	0	0	0	0	0	0	0	0	0	0	0	0	0	0	0	0	0	0	0	0	0	0	0	0	0	60	0	0	0	0	10
2011/08/17	NN1-7	1	d2		0	0	0	4.95049504950495	0	0	0	0	0	0	0	0	0	0	0	0	0	0	0	0	0	0	0	0	0	0	0	0	0	0	0	0	0	0	0	0	0	0	0	74.2574257425743	0	0	0	0	2.97029702970297
2011/08/17	NN1-7	1	d3		0	0	0	4.80769230769231	0	0	0	0	0	0	0	0	0	0	0	0	0	0	0	0	0	0	0	0	0	0	0	0	0	0	0	0	0	0	0	0	0	0	0	76.9230769230769	0	0	0	0	0
2011/08/17	NN1-7	1	d4		0	0	0	0	0.980392156862745	0	0	0	0	0	0	0	0	0	0	0	0	0	0	0	0	0	0	0	0	0	0	0	0	0	0	0	0	0	0	0	0	0	0	68.6274509803922	0	0	0	0	4.90196078431373
2011/08/17	NN1-7	2	d1		0	0	0	0	0	0	0	0	0	0	0	0	0	0	0	0	0	0	0	0	0	0	0	0	0	0	0	0	0	0	0	0	0	0	0	0	0	0	0	58.8235294117647	2.94117647058824	0	0.980392156862745	0	2.94117647058824
2011/08/17	NN1-7	2	d2		0	0	0	9.61538461538462	0	2.88461538461538	0	0	0	0	0	0	0	0	0	0	0	0	0	0	0	0	0	0	0	0	0	0	0	0	0	0	0	0	0	0	0	0	0	38.4615384615385	0	0	0.961538461538462	0	4.80769230769231
2011/08/17	NN1-7	2	d3		0	0	0	2.9126213592233	0	0	0	0	0	0	0	0	0	0	0	0	0	0	0	0	0	0	0	0	0	0	0	0	0	0	0	0	0	0	0	0	0	0	0	33.9805825242718	0	0	0	0	1.94174757281553
2011/08/17	NN1-7	2	d4		0	0	0	0	2.9126213592233	0	0	0	0	0	0	0	0	0	0	0	0	0	0	0	0	0	0	0	0	0	0	0	0	0	0	0	0	0	0	0	0	0	0	43.6893203883495	0	0	1.94174757281553	0	1.94174757281553
2011/08/17	NN1-7	3	d1		0	0	0	9.43396226415094	0	0	0	0	0	1.88679245283019	0	0	0	0	0	0	0	0	0	0	0	0	0	0	0	0	0	0	0	0	0	0	0	0	0	0	0	0	0	9.43396226415094	2.83018867924528	0	0	0	4.71698113207547
2011/08/17	NN1-7	3	d2		0	0	0	24.5098039215686	0	0	0	0	0	1.96078431372549	0	0	0	0	0	0	0	0	0	0	0	0	0	0	0	0	0	0	0	0	0	0	0	0	0	0	0	0	0	9.80392156862745	0	0	0	0	4.90196078431373
2011/08/17	NN1-7	3	d3		0	0	0	4.80769230769231	0	0	0	0	0	0	0	0	0	0	0	0	0	0	0	0	0	0	0	0	0	0	0	0	0	0	0	0	0	0	0	0	0	0	0	38.4615384615385	0	0	0	0	0.961538461538462
2011/08/17	NN1-7	3	d4		0	0	0	17.1428571428571	0	0	0	0	0	0.952380952380952	0	0	0	0	0	0	0	0	0	0	0	0	0	0	0	0	0	0	0	0	0	0	0	0	0	0	0	0	0	38.0952380952381	0	0	0	0	0
2011/08/17	NN1-7	4	d1		0	0	0	43.2692307692308	0	1.92307692307692	0	0	0	1.92307692307692	0	0	0	0	0	0	0	0	0	0	0	0	0	0	0	0	0	0	0	0	0	0	0	0	0	0	0	0	0	9.61538461538462	0	0	0	0	4.80769230769231
2011/08/17	NN1-7	4	d2		0	0	0	14.018691588785	0	1.86915887850467	0	0	0	1.86915887850467	0	0	0	0	0	0	0	0	0	0	0	0	0	0	0	0	0	0	0	0	0	0	0	0	0	0	0	0	0	9.34579439252336	0	0	0	0	4.67289719626168
2011/08/17	NN1-7	4	d3		0	0	0	9.61538461538462	0	1.92307692307692	0	0	0	1.92307692307692	0	0	0	0	0	0	0	0	0	0	0	0	0	0	0	0	0	0	0	0	0	0	0	0	0	0	0	0	0	14.4230769230769	0	0	0	0	4.80769230769231
2011/08/17	NN1-7	4	d4		0	0	0	9.43396226415094	2.83018867924528	0	0	0	0	0.943396226415094	0	0	0	0	0	0	0	0	0	0	0	0	0	0	0	0	0	0	0	0	0	0	0	0	0	0	0	0	0	37.7358490566038	0	0	1.88679245283019	0	4.71698113207547
2011/08/17	NN1-7	5	d1		0	0	0	76.9230769230769	0	1.92307692307692	0	0	0	1.92307692307692	0	0	0	0	0	0	0	0	0	0	0	0	0	0	0	0	0	0	0	0	0	0	0	0	0	0	0	0	0	4.80769230769231	0	0	0	0	4.80769230769231
2011/08/17	NN1-7	5	d2		0	0	0	1.88679245283019	4.71698113207547	1.88679245283019	0	0	0	1.88679245283019	0	0	0	0	0	0	0	0	0	0	0	0	0	0	0	0	0	0	0	0	0	0	0	0	0	0	0	0	0	14.1509433962264	0	0	0	0	9.43396226415094
2011/08/17	NN1-7	5	d3		0	0	0	5.60747663551402	1.86915887850467	1.86915887850467	0	0	0	1.86915887850467	0	0	0	0	0	0	0	0	0	0	0	0	0	0	0	0	0	0	0	0	0	0	0	0	0	0	0	0	0	14.018691588785	0	0	0	0	0
2011/08/17	NN1-7	5	d4		0	0	0	19.047619047619	0	4.76190476190476	0	0	0	1.9047619047619	0	0	0	0	0	0	0	0	0	0	0	0	0	0	0	0	0	0	0	0	0	0	0	0	0	0	0	0	0	28.5714285714286	0	0	1.9047619047619	0	0
2011/08/17	NN1-7	6	d1		0	0	0	73.394495412844	1.8348623853211	0.917431192660551	0	0	0	1.8348623853211	0	0	0	0	0	0	0	0	0	0	0	0	0	0	0	0	0	0	0	0	0	0	0	0	0	0	0	0	0	4.58715596330275	0	0	0	0	2.75229357798165
2011/08/17	NN1-7	6	d2		0	0	0	12.8205128205128	0	1.70940170940171	0	0	0	2.56410256410256	0	0	0	0	0	0	0	0	0	0	0	0	0	0	0	0	0	0	0	0	0	0	0	0	0	0	0	0	0	4.27350427350427	0	0	0	0	12.8205128205128
2011/08/17	NN1-7	6	d3		0	0	0	4.71698113207547	0	4.71698113207547	0	0	0	2.83018867924528	0	0	0	0	0	0	0	0	0	0	0	0	0	0	0	0	0	0	0	0	0	0	0	0	0	0	0	0	0	9.43396226415094	0	0	0	0	0
2011/08/17	NN1-7	6	d4		0	0	0	28.8461538461538	0	4.80769230769231	0	0	0	1.92307692307692	0	0	0	0	0	0	0	0	0	0	0	0	0	0	0	0	0	0	0	0	0	0	0	0	0	0	0	0	0	19.2307692307692	0	0	4.80769230769231	0	0
2011/08/17	NN1-7	7	d1		0	0	0	18.5185185185185	2.77777777777778	0.925925925925926	0	0	0	2.77777777777778	0	0	9.25925925925926	0	0	0	0	0	0	0	0	0	0	0	0	0	0	0	0	0	0	0	0	0	0	0	0	0	0	9.25925925925926	0	0	0.925925925925926	0	0
2011/08/17	NN1-7	7	d2		0	0	0	4.85436893203883	0	0.970873786407767	0	0	0	2.9126213592233	0	0	29.126213592233	0	0	0	0	0	0	0	0	0	0	0	0	0	0	0	0	0	0	0	0	0	0	0	0	0	0	1.94174757281553	0	0	1.94174757281553	0	0
2011/08/17	NN1-7	7	d3		0	0	0	4.67289719626168	1.86915887850467	0.934579439252336	0	0	0	1.86915887850467	0	0	28.0373831775701	0	0	0	0	0	0	0	0	0	0	0	0	0	0	0	0	0	0	0	0	0	0	0	0	0	0	4.67289719626168	0	0	4.67289719626168	0	1.86915887850467
2011/08/17	NN1-7	7	d4		0	0	0	9.70873786407767	1.94174757281553	1.94174757281553	0	0	0	1.94174757281553	0	0	0	0	0	0	0	0	0	0	0	0	0	0	0	0	0	0	0	0	0.970873786407767	0	0	0	0	0	0	0	0	9.70873786407767	0	0	4.85436893203883	0	0
2011/08/17	NN8-14	8	d1		0	0	0	23.5849056603774	1.88679245283019	0.943396226415094	0	0	0	0.943396226415094	0	0	0	0	0	0	0	0	0	0	0	0	0	0	0	0	0	0	0	0	0	0	0	0	0	0	0	0	0	9.43396226415094	0	0	9.43396226415094	0	4.71698113207547
2011/08/17	NN8-14	8	d2		0	0	0	29.126213592233	1.94174757281553	0.970873786407767	0	0	0	0	0	0	4.85436893203883	0	0	0	0	0	0	0	0	0	0	0	0	0	0	0	0	0	0	0	0	0	0	0	0	0	0	9.70873786407767	1.94174757281553	1.94174757281553	4.85436893203883	0	0
2011/08/17	NN8-14	8	d3		0	0	0	1.96078431372549	0	1.96078431372549	0	0	0	0.980392156862745	0	0	0	0	0	0	0	0	0	0	0	0	0	0	0	0	0	0	0	0	0	0	0	0	0	0	0	0	0	19.6078431372549	0	0	1.96078431372549	0	4.90196078431373
2011/08/17	NN8-14	8	d4		0	0	0	9.61538461538462	0	9.61538461538462	0	0	0	0	0	0	0	0	0	0	0	4.80769230769231	0	0	0	0	0	0	0	0	0	0	0	0	0	0	0	0	0	0	0	0	0	19.2307692307692	0	0	0	0	0
2011/08/17	NN8-14	9	d1		0	0	0	28.3018867924528	1.88679245283019	0.943396226415094	0	0	0	0.943396226415094	0	0	0	0	0	0	0	0	0	0	0	0	0	0	0	0	0	0	0	0	0	0	0	0	0	0	0	0	0	18.8679245283019	0	0	4.71698113207547	0	0
2011/08/17	NN8-14	9	d2		0	0	0	4.90196078431373	0	1.96078431372549	0	0	0	0.980392156862745	0	0	0	0	0	0	0	0	0	0	0	0	0	0	0	0	0	0	0	0	0	0	0	0	0	0	0	0	0	19.6078431372549	0	0	4.90196078431373	0	4.90196078431373
2011/08/17	NN8-14	9	d3		0	0	0	1.88679245283019	0.943396226415094	0	0	0	0	0.943396226415094	0	0	0	0	0	0	0	0	0	0	0	0	0	0	0	0	0	0	0	0	0	0	0	0	0	0	0	0	0	28.3018867924528	0	0	1.88679245283019	0	0
2011/08/17	NN8-14	9	d4		0	0	0	2	0	10	0	0	0	0	0	0	0	0	0	0	0	0	0	0	0	0	0	0	0	0	0	0	0	0	0	0	0	0	0	0	0	0	0	30	2	0	2	0	0
2011/08/17	NN8-14	10	d1		0	0	0	9.52380952380952	0	0.952380952380952	0	0	0	1.9047619047619	0	0	0	0	0	0	0	0	0	0	0	0	0	0	0	0	0	0	0	0	0	0	0	0	0	0	0	0	0	47.6190476190476	0	0	4.76190476190476	0	0
2011/08/17	NN8-14	10	d2		0	0	0	9.70873786407767	0	0.970873786407767	0	0	0	0	0	0	0	0	0	0	0	0	0	0	0	0	0	0	0	0	0	0	0	0	0	0	0	0	0	0	0	0	0	48.5436893203884	0	0	9.70873786407767	0	0
2011/08/17	NN8-14	10	d3		0	0	0	14.5631067961165	0	1.94174757281553	0	0	0	0	0	0	0	0	0	0	0	0	0	0	0	0	0	0	0	0	0	0	0	0	0	0	0	0	0	0	0	0	0	38.8349514563107	0	0	4.85436893203883	0	0
2011/08/17	NN8-14	10	d4		0	0	0	24.5098039215686	0	4.90196078431373	0	0	0	0	0	0	0	0	0	0	0	0	0	0	0	0	0	0	0	0	0	0	0	0	0	0	0	0	0	0	0	0	0	29.4117647058824	0	0	0	0	0
2011/08/17	NN8-14	11	d1		0	0	0	4.95049504950495	0	0	0	0	0	0.99009900990099	0	0	0	0	0	0	0	0	0	0	0	0	0	0	0	0	0	0	0	0	0	0	0	0	0	0	0	0	0	59.4059405940594	0	0	4.95049504950495	0	0
2011/08/17	NN8-14	11	d2		0	0	0	4.90196078431373	0	0	0	0	0	2.94117647058824	0	0	0	0	0	0	0	0	0	0	0	0	0	0	0	0	0	0	0	0	0	0	4.90196078431373	0	0	0	0	0	0	58.8235294117647	0	0	1.96078431372549	0	0
2011/08/17	NN8-14	11	d3		0	0	0	9.61538461538462	0	0.961538461538462	0	0	0	2.88461538461538	0	0	0	0	0	0	0	0	0	0	0	0	0	0	0	0	0	0	0	0	0	0	4.80769230769231	0	0	0	0	0	0	38.4615384615385	0	0	9.61538461538462	0	0
2011/08/17	NN8-14	11	d4		0	0	0	4.76190476190476	0	1.9047619047619	0	0	0	2.85714285714286	0	0	0	0	0	0	0	0	0	0	0	0	0	0	0	0	0	0	0	0	0	0	0	0	0	0	0	0	0	42.8571428571429	0	0	9.52380952380952	0	0
2011/08/17	NN8-14	12	d1		0	0	0	4.76190476190476	0.952380952380952	0.952380952380952	0	0	0	2.85714285714286	0	0	0	0	0	0	0	0	0	0	0	0	0	0	0	0	0	0	0	0	0	0	0	0	0	0	0	0	0	47.6190476190476	0	4.76190476190476	9.52380952380952	0	0
2011/08/17	NN8-14	12	d2		0	0	0	0	0	0.952380952380952	0	0	0	2.85714285714286	0	0	0	0	0	0	0	0	0	0	0	0	0	0	0	0	0	0	0	0	0	0	0	0	0	0	0	0	0	61.9047619047619	0	0	4.76190476190476	0	0
2011/08/17	NN8-14	12	d3		0	0	0	19.4174757281553	0	0	0	0	0	2.9126213592233	0	0	0	0	0	0	0	0	0	0	0	0	0	0	0	0	0	0	0	0	0	0	0	0	0	0	0	0	0	38.8349514563107	0	0	4.85436893203883	0	0
2011/08/17	NN8-14	12	d4		0	0	0	1.92307692307692	0	9.61538461538462	0	0	0	2.88461538461538	0	0	0	0	0	0	0	0	0	0	0	0	0	0	0	0	0	0	0	0	0	0	0	0	0	0	0	0	0	38.4615384615385	1.92307692307692	0	14.4230769230769	0	0
2011/08/17	NN8-14	13	d1		0	0	0	38.4615384615385	4.80769230769231	9.61538461538462	1.92307692307692	0	0	1.92307692307692	0	0	0	0	0	0	0	0	0	0	0	0	0	0	0	0	0	0	0	0	0	0	0	0	0	0	0	0	0	19.2307692307692	0	0	19.2307692307692	0	0
2011/08/17	NN8-14	13	d2		0	0	0	18.5185185185185	0	4.62962962962963	0	0	0	2.77777777777778	0	0	0	0	0	0	0	0	0	0	0	0	0	0	0	0	0	0	0	0	0	0	37.037037037037	0	0	0	0	0	0	13.8888888888889	0	0	13.8888888888889	0	0
2011/08/17	NN8-14	13	d3		0	0	0	0	0	24.5098039215686	0	0	0	1.96078431372549	0	0	0	0	0	0	0	0	0	0	0	0	0	0	0	0	0	0	0	0	0	0	0	0	4.90196078431373	0	0	0	0	29.4117647058824	0	0	14.7058823529412	0	0
2011/08/17	NN8-14	13	d4		0	0	0	0	0	10.1010101010101	0	0	0	2.02020202020202	0	0	0	0	0	0	0	20.2020202020202	0	0	0	0	0	0	0	0	0	0	0	0	0	0	0	0	10.1010101010101	0	0	0	0	20.2020202020202	5.05050505050505	0	20.2020202020202	0	0
2011/08/17	NN8-14	14	d1		0	0	0	10.1010101010101	2.02020202020202	15.1515151515152	0	0	0	2.02020202020202	0	0	0	0	0	0	0	0	0	0	0	0	0	0	0	0	0	0	0	0	0	0	0	0	0	0	0	0	0	20.2020202020202	0	0	30.3030303030303	0	0
2011/08/17	NN8-14	14	d2		0	0	0	37.3831775700935	1.86915887850467	9.34579439252336	0	0	0	2.80373831775701	0	0	0	0	0	0	0	0	0	0	0	0	0	0	0	0	0	0	0	0	1.86915887850467	0	0	0	0	0	0	0	0	9.34579439252336	0	0	23.3644859813084	0	4.67289719626168
2011/08/17	NN8-14	14	d3		0	0	0	10.752688172043	0	0	0	0	0	3.2258064516129	0	0	0	0	0	0	0	0	0	0	0	0	0	0	0	0	0	0	0	0	0	0	0	0	5.37634408602151	0	0	0	0	21.505376344086	0	0	53.763440860215	0	0
2011/08/17	NN8-14	14	d4		0	0	0	0	0	0	0	0	0	2.02020202020202	0	0	0	0	0	0	0	5.05050505050505	0	0	0	0	0	0	0	0	0	0	0	0	0	0	70.7070707070707	0	0	0	0	0	0	10.1010101010101	0	0	10.1010101010101	0	0
2011/08/19	SW	1	d1		0	0	0	9.9009900990099	0	0	0	0	0	0.99009900990099	0	0	0	0	0	0	0	0	0	0	0	0	0	0	0	0	0	0	0	0	0	0	0	0	0	0	0	0	0	29.7029702970297	0	0	4.95049504950495	0	4.95049504950495
2011/08/19	SW	1	d2		0	0	0	14.8514851485149	0	0	0	0	0	0.99009900990099	0	4.95049504950495	0	0	0	0	0	0	0	0	0	0	0	0	0	0	0	0	0	0	0	0	0	0	0	0	0	0	0	24.7524752475248	0	0	4.95049504950495	0	0
2011/08/19	SW	1	d3		0	0	0	4.76190476190476	0	0	0	0	0	0.952380952380952	0	4.76190476190476	0	0.952380952380952	0	0	0	0	0	0	0	0	0	0	0	0	0	0	0	0	0	0	0	0	0	0	0	0	0	28.5714285714286	0	0	1.9047619047619	0	0
2011/08/19	SW	1	d4		0	0	0	23.8095238095238	0	0	0	0	0	0.952380952380952	0	0	0	0	0	0	0	0	0	0	0	0	0	0	0	0	0	0	0	0	0	0	0	0	0	0	0	1.9047619047619	0	28.5714285714286	0	0	4.76190476190476	0	0
2011/08/19	SW	2	d1		0	0	0	0	0	0	0	0	0	2.85714285714286	0	19.047619047619	0	0	0	0	0	0	0	0	0	0	0	0	0	0	0	0	0	0	0	0	0	0	0	0	0	0	0	33.3333333333333	0	0	1.9047619047619	0	0
2011/08/19	SW	2	d2		0	0	0	9.70873786407767	0	0	0	0	0	2.9126213592233	0	9.70873786407767	0	0	0	0	0	0	0	0	0	0	0	0	0	0	0	0	0	0	0	0	0	0	0	0	0	0	0	33.9805825242718	0	0	0	0	0
2011/08/19	SW	2	d3		0	0	0	9.70873786407767	0	0	0	0	0	0.970873786407767	0	4.85436893203883	0	0	0	0	0	0	0	0	0	0	0	0	0	0	0	0	0	0	0	0	0	0	0	0	0	0	0	38.8349514563107	0	0	0.970873786407767	0	0
2011/08/19	SW	2	d4		0	0	0	9.80392156862745	0	4.90196078431373	0	0	0	0.980392156862745	0	0	0	0	0	0	0	0	0	0	0	0	0	0	0	0	0	0	0	0	0	0	0	0	0	0	0	1.96078431372549	0	29.4117647058824	0	0	0	0	9.80392156862745
2011/08/19	SW	3	d1		0	0	0	9.43396226415094	0	1.88679245283019	0	0	0	2.83018867924528	0	4.71698113207547	0	1.88679245283019	0	0	0	0	0	0	0	0	0	0	0	0	0	0	0	0	0	0	0	0	0	0	0	0	0	18.8679245283019	0	0	0	0	4.71698113207547
2011/08/19	SW	3	d2		0	0	0	18.1818181818182	0	0	0	0	0	1.81818181818182	0	4.54545454545455	0	1.81818181818182	0	0	0	0	0	0	0	0	0	0	0	0	0	0	0	0	0	0	0	0	0	0	0	0	0	27.2727272727273	0	0	0.909090909090909	0	0
2011/08/19	SW	3	d3		0	0	0	14.1509433962264	0	0.943396226415094	0	0	0	0.943396226415094	0	4.71698113207547	0	1.88679245283019	0	0	0	0	0	0	0	0	0	0	0	0	0	0	0	0	0	0	0	0	0	0	0	0	0	37.7358490566038	0	0	0	0	1.88679245283019
2011/08/19	SW	3	d4		0	0	0	26.7857142857143	0	0.892857142857143	0	0	0	0.892857142857143	0	0	0	1.78571428571429	0	0	0	0	0	0	0	0	0	0	0	0	0	0	0	0	0	0	0	0	0	0	0	4.46428571428571	0	26.7857142857143	0	0	0.892857142857143	0	1.78571428571429
2011/08/19	SW	4	d1		0	0	0	19.4174757281553	0	0	0	0	0	0.970873786407767	0	0	0	0	0	0	0	0	0	0	0	0	0	0	0	0	0	0	0	0	0	0	29.126213592233	0	0	0	0	0	0	9.70873786407767	0	0	0	0	1.94174757281553
2011/08/19	SW	4	d2		0	0	0	32.7102803738318	0	0.934579439252336	0	0	0	2.80373831775701	0	0	0	0	0	0	0	0	0	0	0	0	0	0	0	0	0	0	0	0	0	0	0	0	0	0	0	0	0	4.67289719626168	0	0	0	0	0
2011/08/19	SW	4	d3		0	0	0	4.67289719626168	0	1.86915887850467	0	0	0	0.934579439252336	0	0	0	0	0	0	0	0	0	0	0	0	0	0	0	0	0	0	0	0	0	0	14.018691588785	0	0	0	0	0	0	32.7102803738318	0	0	0	0	0
2011/08/19	SW	4	d4		0	0	0	5	0	10	0	0	0	0	0	0	0	0	0	0	0	0	0	0	0	0	0	0	0	0	0	0	0	0	0	0	0	0	0	0	0	0	0	30	0	0	0	0	0
2011/08/19	SE	1	d1		0	0	0	24.7524752475248	0	0	0	0	0	0	0	9.9009900990099	0	0	0	0	0	1.98019801980198	0	0	0	0	0	0	0	0	0	0	0	0	0	0	0	0	0	0	0	0	0	34.6534653465347	0	0	0	0	1.98019801980198
2011/08/19	SE	1	d2		0	0	0	9.52380952380952	4.76190476190476	0	0	0	0	0	0	14.2857142857143	0	0	0	0	0	4.76190476190476	0	0	0	0	0	0	0	0	0	0	0	0	0	0	0	0	4.76190476190476	0	0	0	0	19.047619047619	0	0	0	0	14.2857142857143
2011/08/19	SE	1	d3		0	0	0	19.2307692307692	6.41025641025641	1.28205128205128	0	0	0	0	0	12.8205128205128	0	0	0	0	0	0	0	0	0	0	0	0	0	0	0	0	0	0	0	0	0	0	0	0	0	0	0	25.6410256410256	0	0	2.56410256410256	0	12.8205128205128
2011/08/19	SE	1	d4		0	0	0	25	2	0	0	0	0	1	0	10	0	0	0	0	0	0	0	0	0	0	0	0	0	0	0	0	0	0	0	0	0	0	0	0	0	0	0	15	0	0	5	0	0
2011/08/19	SE	2	d1		0	0	0	28.5714285714286	4.76190476190476	0	0	0	0	1.9047619047619	0	0	0	0	0	0	0	4.76190476190476	0	0	0	0	0	0	0	0	0	0	0	0	0	0	0	0	0	0	0	0	0	28.5714285714286	0	0	0.952380952380952	0	0
2011/08/19	SE	2	d2		0	0	0	33.9805825242718	4.85436893203883	0	0	0	0	0	0	19.4174757281553	0	0	0	0	0	0	0	0	0	0	0	0	0	0	0	0	0	0	0	0	0	0	0	0	0	0	0	0	0	0	0.970873786407767	0	24.2718446601942
2011/08/19	SE	2	d3		0	0	0	18.5185185185185	4.62962962962963	0	0	0	0	0	0	13.8888888888889	0	0	0	0	0	0	0	0	0	0	0	0	0	0	0	0	0	0	0	0	0	0	0	0	0	0	0	13.8888888888889	0	0	0.925925925925926	0	9.25925925925926
2011/08/19	SE	2	d4		0	0	0	29.126213592233	4.85436893203883	1.94174757281553	0	0	0	2.9126213592233	0	9.70873786407767	0	0	0	0	0	0	0	0	0	0	0	0	0	0	0	0	0	0	0	0	0	0	0	0	0	0	0	19.4174757281553	0	0	0	0	0
2011/08/19	SE	3	d1		0	0	0	9.61538461538462	4.80769230769231	0.961538461538462	0	0	0	0.961538461538462	0	19.2307692307692	0	0	0	0	0	0	0	0	0	0	0	0	0	0	0	0	0	0	0	0	0	0	0	0	0	0	0	19.2307692307692	1.92307692307692	0	4.80769230769231	0	9.61538461538462
2011/08/19	SE	3	d2		0	0	0	9.80392156862745	9.80392156862745	0	0	0	0	0.980392156862745	0	29.4117647058824	0	0	0	0	0	0	0	0	0	0	0	0	0	0	0	0	0	0	0	0	0	0	0	0	0	0	0	9.80392156862745	1.96078431372549	0	1.96078431372549	0	4.90196078431373
2011/08/19	SE	3	d3		0	0	0	0	1.86915887850467	1.86915887850467	0	0	0	0.934579439252336	0	28.0373831775701	0	0	0	0	0	4.67289719626168	0	0	0	0	0	0	0	0	0	0	0	0	0	0	0	0	0	0	0	0	0	9.34579439252336	1.86915887850467	0	4.67289719626168	0	0
2011/08/19	SE	3	d4		0	0	0	9.61538461538462	1.92307692307692	0	0	0	0	0.961538461538462	0	19.2307692307692	0	0	0	0	0	1.92307692307692	0	0	0	0	0	0	0	0	0	0	0	0	0	0	0	0	0	0	0	0	0	19.2307692307692	1.92307692307692	0	0	0	0
2011/08/19	SE	4	d1		0	0	0	4.80769230769231	0	0	0	0	0	1.92307692307692	0	28.8461538461538	0	0	0	0	0	4.80769230769231	0	0	0	0	0	0	0	0	0	0	0	0	0	0	0	0	0	0	0	0	0	19.2307692307692	1.92307692307692	0	4.80769230769231	0	4.80769230769231
2011/08/19	SE	4	d2		0	0	0	18.8679245283019	4.71698113207547	0.943396226415094	0	0	0	0.943396226415094	0	18.8679245283019	0	0	0	0	0	0	0	0	0	0	0	0	0	0	0	0	0	0	0	0	0	0	0	0	0	0	0	9.43396226415094	1.88679245283019	0	4.71698113207547	0	1.88679245283019
2011/08/19	SE	4	d3		0	0	0	9.43396226415094	4.71698113207547	0.943396226415094	0	0	0	0.943396226415094	0	18.8679245283019	0	0	0	0	0	0	0	0	0	0	0	0	0	0	0	0	0	0	0	0	0	0	0	0	0	0	0	9.43396226415094	1.88679245283019	0	4.71698113207547	0	1.88679245283019
2011/08/19	SE	4	d4		0	0	0	19.2307692307692	0	2.88461538461538	0	0	0	0.961538461538462	0	28.8461538461538	0	0	0	0	0	0	0	0	0	0	0	0	0	0	0	0	0	0	0	0	0	0	0	0	0	0	0	14.4230769230769	0	0	4.80769230769231	0	0
2011/09/04	NN1-7	1	d1		0	0	0	19.2307692307692	0	0	0	0	0	0	0	0	0	0	0	0	0	0	0	0	0	0	0	0	0	0	0	0	0	0	0	0	0	0	0	0	0	0	0	28.8461538461538	1.92307692307692	0	0	0	6.73076923076923
2011/09/04	NN1-7	1	d2		0	0	0	20	0	0	0	0	0	0	0	0	0	0	0	0	0	0	0	0	0	0	0	0	0	0	0	0	0	0	0	0	0	0	0	0	0	0	0	45	0	0	0	0	0
2011/09/04	NN1-7	1	d3		0	0	0	34.6534653465347	0	0	0	0	0	0.99009900990099	0	0	0	0	0	0	0	0	0	0	0	0	0	0	0	0	0	0	0	0	0	0	0	0	0	0	0	0	0	39.6039603960396	0	0	0	0	0
2011/09/04	NN1-7	1	d4		0	0	0	0	1.92307692307692	0	0	0	0	0.961538461538462	0	0	0	0	0	0	0	0	0	0	0	0	0	0	0	0	0	0	0	0	0	0	0	0	0	0	0	0	0	48.0769230769231	0	0	0	0	4.80769230769231
2011/09/04	NN1-7	2	d1		0	0	0	0	0	0	0	0	0	0	0	0	0	0	0	0	0	0	0	0	0	0	0	0	0	0	0	0	0	0	0	0	0	0	0	0	0	0	0	60	0	0	0	0	0
2011/09/04	NN1-7	2	d2		0	0	0	33.9805825242718	0	1.94174757281553	0	0	0	0	0	0	0	0	0	0	0	0	0	0	0	0	0	0	0	0	0	0	0	0	0	0	0	0	0	0	0	0	0	38.8349514563107	0	0	0.970873786407767	0	4.85436893203883
2011/09/04	NN1-7	2	d3		0	0	0	10	0	0	0	0	0	0	0	0	0	0	0	0	0	0	0	0	0	0	0	0	0	0	0	0	0	0	0	0	0	0	0	0	0	0	0	60	0	0	0	0	0
2011/09/04	NN1-7	2	d4		0	0	0	0	3.06122448979592	0	0	0	0	0	0	0	0	0	0	0	0	0	0	0	0	0	0	0	0	0	0	0	0	0	0	0	0	0	0	0	0	0	0	61.2244897959184	35.7142857142857	0	0	0	0
2011/09/04	NN1-7	3	d1		0	0	0	25	0	0	0	0	0	0	0	0	0	0	0	0	0	0	0	0	0	0	0	0	0	0	0	0	0	0	0	0	0	0	0	0	0	0	0	35	0	0	0	0	0
2011/09/04	NN1-7	3	d2		0	0	0	47.3684210526316	0	0	0	0	0	0	0	0	0	0	0	0	0	5.26315789473684	0	0	0	0	0	0	0	0	0	0	0	0	0	0	0	0	0	0	0	0	0	31.5789473684211	0	0	0	0	0
2011/09/04	NN1-7	3	d3		0	0	0	9.70873786407767	0	0	0	0	0	0	0	0	0	0	0	0	0	2.9126213592233	0	0	0	0	0	0	0	0	0	0	0	0	0	0	0	0	0	0	0	0	0	48.5436893203884	0	0	0	0	4.85436893203883
2011/09/04	NN1-7	3	d4		0	0	0	27.2727272727273	2.72727272727273	0	0	0	0	0	0	0	0	0	0	0	0	2.72727272727273	0	0	0	0	0	0	0	0	0	0	0	0	0	0	0	0	0	0	0	0	0	40.9090909090909	0	0	0.909090909090909	0	2.72727272727273
2011/09/04	NN1-7	4	d1		0	0	0	76.1904761904762	0	0	0	0	0	0	0	0	0	0	0	0	0	2.85714285714286	0	0	0	0	0	0	0	0	0	0	0	0	0	0	0	0	0	0	0	0	0	9.52380952380952	0	0	0	0	1.9047619047619
2011/09/04	NN1-7	4	d2		0	0	0	29.7029702970297	0	0.99009900990099	0	0	0	0	0	0	0	0	0	0	0	2.97029702970297	0	0	0	0	0	0	0	0	0	0	0	0	0	0	0	0	0	0	0	0	0	19.8019801980198	0	0	0	0	0
2011/09/04	NN1-7	4	d3		0	0	0	18.8679245283019	0	0.943396226415094	0	0	0	0	0	0	0	0	0	0	0	1.88679245283019	0	0	0	0	0	0	0	0	0	0	0	0	0	0	0	0	0	0	0	0	0	47.1698113207547	0	0	0	0	2.83018867924528
2011/09/04	NN1-7	4	d4		0	0	0	14.4230769230769	1.92307692307692	0	0	0	0	0	0	0	0	0	0	0	0	0	0	0	0	0	0	0	0	0	0	0	0	0	0	0	0	0	0	0	0	0	4.80769230769231	28.8461538461538	0	0	1.92307692307692	0	4.80769230769231
2011/09/04	NN1-7	5	d1		0	0	0	89.1089108910891	0	0.99009900990099	0	0	0	0	0	0	0	0	0	0	0	0	0	0	0	0	0	0	0	0	0	0	0	0	0	0	0	0	0	0	0	0	0	4.95049504950495	0	0	0	0	0
2011/09/04	NN1-7	5	d2		0	0	0	4.95049504950495	0	0.99009900990099	0	0	0	0	0	0	0	0	0	0	0	4.95049504950495	0	0	0	0	0	0	0	0	0	0	0	0	0	0	0	0	0	0	0	0	0	19.8019801980198	0	0	0	0	4.95049504950495
2011/09/04	NN1-7	5	d3		0	0	0	14.5631067961165	0	0.970873786407767	0	0	0	0	0	0	0	0	0	0	0	9.70873786407767	0	0	0	0	0	0	0	0	0	0	0	0	0	0	0	0	0	0	0	0	0	19.4174757281553	0	0	1.94174757281553	0	0
2011/09/04	NN1-7	5	d4		0	0	0	29.4117647058824	0	4.90196078431373	0	0	0	0	0	0	0	0	0	0	0	0	0	0	0	0	0	0	0	0	0	0	0	0	0	0	0	0	0	0	0	0	0	19.6078431372549	0	0	1.96078431372549	0	0
2011/09/04	NN1-7	6	d1		0	0	0	80.8080808080808	5.05050505050505	1.01010101010101	0	0	0	0	0	0	0	0	0	0	0	0	0	0	0	0	0	0	0	0	0	0	0	0	0	0	0	0	0	0	0	0	0	10.1010101010101	0	0	0	0	2.02020202020202
2011/09/04	NN1-7	6	d2		0	0	0	38.0952380952381	0	0.952380952380952	0	0	0	0	0	0	0	0	0	0	0	0	0	0	0	0	0	0	0	0	0	0	0	0	0	0	0	0	0	0	0	0	0	19.047619047619	0	0	0	0	9.52380952380952
2011/09/04	NN1-7	6	d3		0	0	0	14.7058823529412	0	9.80392156862745	0	0	0	0	0	0	0	0	0	0	0	1.96078431372549	0	0	0	0	0	0	0	0	0	0	0	0	0	0	0	0	0	0	0	0	0	19.6078431372549	0	0	0	0	0
2011/09/04	NN1-7	6	d4		0	0	0	33.3333333333333	2.85714285714286	1.9047619047619	0	0	0	0	0	0	0	0	0	0	0	0	0	0	0	0	0	0	0	0	0	0	0	0	0	0	0	0	0	0	0	0	0	38.0952380952381	0	0	4.76190476190476	0	0
2011/09/04	NN1-7	7	d1		0	0	0	35	5	1	0	0	0	0	0	0	10	0	0	0	0	0	0	0	0	0	0	0	0	0	0	0	0	0	0	0	0	0	0	0	0	0	0	10	0	0	2	0	0
2011/09/04	NN1-7	7	d2		0	0	0	19.8019801980198	0	0.99009900990099	0	0	0	0	0	0	29.7029702970297	0	0	0	0	0	0	0	0	0	0	0	0	0	0	0	0	0	0	0	0	0	0	0	0	0	0	4.95049504950495	0	0	0	0	0
2011/09/04	NN1-7	7	d3		0	0	0	9.61538461538462	2.88461538461538	0.961538461538462	0	0	0	0	0	0	28.8461538461538	0	0	0	0	0	0	0	0	0	0	0	0	0	0	0	0	0	0	0	0	0	0	0	0	0	0	9.61538461538462	0	0	4.80769230769231	0	9.61538461538462
2011/09/04	NN1-7	7	d4		0	0	0	19.047619047619	1.9047619047619	1.9047619047619	0	0	0	0	0	0	0	0	0	0	0	0	0	0	0	0	0	0	0	0	0	0	0	0	0.952380952380952	0	0	0	0	0	0	0	0	38.0952380952381	0	0	9.52380952380952	0	0
2011/09/04	NN8-14	8	d1		0	0	0	46.7289719626168	0	0	0	0	0	0	0	0	0	0	0	0	0	0	0	0	0	0	0	0	0	0	0	0	0	0	0	0	0	0	0	0	0	0	0	14.018691588785	0	0	1.86915887850467	0	4.67289719626168
2011/09/04	NN8-14	8	d2		0	0	0	39.6039603960396	1.98019801980198	0.99009900990099	0	0	0	0	0	0	0	0	0	0	0	0	0	0	0	0	0	0	0	0	0	0	0	0	0	0	0	0	0	0	0	0	0	29.7029702970297	0	0.99009900990099	1.98019801980198	0	0
2011/09/04	NN8-14	8	d3		0	0	0	9.9009900990099	0	0.99009900990099	0	0	0	0	0	0	4.95049504950495	0	0	0	0	0	0	0	0	0	0	0	0	0	0	0	0	0	0	0	0	0	0	0	0	0	0	39.6039603960396	0	0	4.95049504950495	0	9.9009900990099
2011/09/04	NN8-14	8	d4		0	0	0	30	0	5	0	0	0	0	0	0	0	0	0	0	0	5	0	0	0	0	0	0	0	0	0	0	0	0	0	0	0	0	0	0	0	0	0	20	0	0	5	0	0
2011/09/04	NN8-14	9	d1		0	0	0	33.6538461538462	0.961538461538462	0.961538461538462	0	0	0	0	0	0	0	0	0	0	0	1.92307692307692	0	0	0	0	0	0	0	0	0	0	0	0	0	0	0	0	0	0	0	0	0	38.4615384615385	0	0	4.80769230769231	0	4.80769230769231
2011/09/04	NN8-14	9	d2		0	0	0	14.5631067961165	1.94174757281553	4.85436893203883	0	0	0	0	0	0	0	0	0	0	0	1.94174757281553	0	0	0	0	0	0	0	0	0	0	0	0	0	0	0	0	0	0	0	0	0	48.5436893203884	0	0	1.94174757281553	0	0
2011/09/04	NN8-14	9	d3		0	0	0	9.9009900990099	1.98019801980198	0	0	0	0	0	0	0	0	0	0	0	0	1.98019801980198	0	0	0	0	0	0	0	0	0	0	0	0	0	0	0	0	0	0	0	0	0	49.5049504950495	0	0	1.98019801980198	0	0
2011/09/04	NN8-14	9	d4		0	0	0	15	0	10	0	0	0	0	0	0	0	0	0	0	0	5	0	0	0	0	0	0	0	0	0	0	0	0	0	0	0	0	0	0	0	0	0	50	0	0	10	0	0
2011/09/04	NN8-14	10	d1		0	0	0	29.126213592233	0	0.970873786407767	0	0	0	0	0	0	0	0	0	0	0	0	0	0	0	0	0	0	0	0	0	0	0	0	0	0	0	0	0	0	0	0	0	38.8349514563107	0	0	19.4174757281553	0	0
2011/09/04	NN8-14	10	d2		0	0	0	28.8461538461538	0	0	0	0	0	0	0	0	0	0	0	0	0	0	0	0	0	0	0	0	0	0	0	0	0	0	0	0	0	0	0	0	0	0	0	38.4615384615385	0	0	19.2307692307692	0	0
2011/09/04	NN8-14	10	d3		0	0	0	29.7029702970297	0	0.99009900990099	0	0	0	0	0	0	0	0	0	0	0	0	0	0	0	0	0	0	0	0	0	0	0	0	0	0	0	0	0	0	0	0	0	39.6039603960396	0	0	19.8019801980198	0	0
2011/09/04	NN8-14	10	d4		0	0	0	35	0	0	0	0	0	0	0	0	0	0	0	0	0	10	0	0	0	0	0	0	0	0	0	0	0	0	0	0	0	0	0	0	0	0	0	30	0	0	15	0	5
2011/09/04	NN8-14	11	d1		0	0	0	9.52380952380952	0	0	0	0	0	0	0	0	0	0	0	0	0	0	0	0	0	0	0	0	0	0	0	0	0	0	0	0	0	0	0	0	0	0	4.76190476190476	33.3333333333333	0	0	14.2857142857143	0	0
2011/09/04	NN8-14	11	d2		0	0	0	10	0	0	0	0	0	0	0	0	0	0	0	0	0	0	0	0	0	0	0	0	0	0	0	0	0	0	0	0	10	0	0	0	0	0	0	35	0	0	10	0	0
2011/09/04	NN8-14	11	d3		0	0	0	30	0	0	0	0	0	0	0	0	0	0	0	0	0	0	0	0	0	0	0	0	0	0	0	0	0	0	0	0	0	0	0	0	0	0	0	35	0	0	15	0	0
2011/09/04	NN8-14	11	d4		0	0	0	19.4174757281553	0	0.970873786407767	0	0	0	0	0	0	0	0	0	0	0	0	0	0	0	0	0	0	0	0	0	0	0	0	0	0	0	0	0	0	0	0	9.70873786407767	19.4174757281553	0	0	14.5631067961165	0	1.94174757281553
2011/09/04	NN8-14	12	d1		0	0	0	19.6078431372549	0.980392156862745	0.980392156862745	0	0	0	0	0	0	0	0	0	0	0	0	0	0	0	0	0	0	0	0	0	0	0	0	0	0	0	0	0	0	0	0	0	34.3137254901961	0	0	9.80392156862745	0	0
2011/09/04	NN8-14	12	d2		0	0	0	0	0	0	0	0	0	0	0	0	0	0	0	0	0	0	0	0	0	0	0	0	0	0	0	0	0	0	0	0	0	0	0	0	0	0	0	20	0	0	10	0	0
2011/09/04	NN8-14	12	d3		0	0	0	35	0	0	0	0	0	0	0	0	0	0	0	0	0	5	0	0	0	0	0	0	0	0	0	0	0	0	0	0	0	0	0	0	0	0	0	20	0	0	10	0	0
2011/09/04	NN8-14	12	d4		0	0	0	15	0	10	0	0	0	0	0	0	0	0	0	0	0	0	0	0	0	0	0	0	0	0	0	0	0	0	0	0	0	0	0	0	0	0	0	20	0	0	15	0	0
2011/09/04	NN8-14	13	d1		0	0	0	56.6037735849057	1.88679245283019	9.43396226415094	1.88679245283019	0	0	0	0	0	0	0	0	0	0	1.88679245283019	0	0	0	0	0	0	0	0	0	0	0	0	0	0	0	0	0	0	0	0	0	18.8679245283019	0	0	9.43396226415094	0	0
2011/09/04	NN8-14	13	d2		0	0	0	39.6039603960396	0	4.95049504950495	0	0	0	0	0	0	0	0	0	0	0	1.98019801980198	0	0	0	0	0	0	0	0	0	0	0	0	1.98019801980198	0	0	0	1.98019801980198	0	0	0	0	14.8514851485149	0	0	19.8019801980198	0	4.95049504950495
2011/09/04	NN8-14	13	d3		0	0	0	0	0	20	0	0	0	0	0	0	0	0	0	0	0	10	0	0	0	0	0	0	0	0	0	0	0	0	0	0	0	0	15	0	0	0	0	30	0	0	20	0	5
2011/09/04	NN8-14	13	d4		0	0	0	4.90196078431373	0	9.80392156862745	0	0	0	0	0	0	0	0	0	0	0	29.4117647058824	0	0	0	0	0	0	0	0	0	0	0	0	0	0	0	0	1.96078431372549	0	0	0	0	19.6078431372549	0	0	19.6078431372549	0	4.90196078431373
2011/09/04	NN8-14	14	d1		0	0	0	59.4059405940594	1.98019801980198	4.95049504950495	1.98019801980198	0	0	0	0	0	0	0	0	0	0	4.95049504950495	0	0	0	0	0	0	0	0	0	0	0	0	0	0	0	0	1.98019801980198	0	0	0	0	9.9009900990099	0	0	14.8514851485149	0	0
2011/09/04	NN8-14	14	d2		0	0	0	49.0196078431373	9.80392156862745	0	0	0	0	0	0	0	0	0	0	0	0	4.90196078431373	0	0	0	0	0	0	0	0	0	0	0	0	0	0	0	0	0	0	0	0	0	9.80392156862745	0	0	24.5098039215686	0	1.96078431372549
2011/09/04	NN8-14	14	d3		0	0	0	20	0	0	0	0	0	0	0	0	0	0	0	0	0	5	0	0	0	0	0	0	0	0	0	0	0	0	0	0	0	0	10	0	0	0	0	5	0	0	50	0	0
2011/09/04	NN8-14	14	d4		0	0	0	0	0	0	0	0	0	0	0	0	0	0	0	0	0	9.80392156862745	0	0	0	0	0	0	0	0	0	0	0	0	0	0	39.2156862745098	0	0	0	0	0	0	4.90196078431373	0	0	39.2156862745098	0	1.96078431372549
2011/09/05	SW	1	d1		0	0	0	19.6078431372549	0	0	0	0	0	0	0	0	0	0	0	0	0	0	0	0	0	0	0	0	0	0	0	0	0	0	0	0	0	0	0	0	0	0	0	39.2156862745098	0	0	4.90196078431373	0	1.96078431372549
2011/09/05	SW	1	d2		0	0	0	30	0	0	0	0	0	0	0	0	0	0	0	0	0	0	0	0	0	0	0	0	0	0	0	0	0	0	0	0	0	0	0	0	0	0	0	35	0	0	5	0	5
2011/09/05	SW	1	d3		0	0	0	14.7058823529412	0	0	0	0	0	0	0	0	0	4.90196078431373	0	0	0	0	0	0	0	0	0	0	0	0	0	0	0	0	0	0	0	0	0	0	0	0	0	39.2156862745098	0	0	1.96078431372549	0	0
2011/09/05	SW	1	d4		0	0	0	34.3137254901961	0	0	0	0	0	0	0	4.90196078431373	0	0	0	0	0	0	0	0	0	0	0	0	0	0	0	0	0	0	0	0	0	0	0	0	0	1.96078431372549	0	39.2156862745098	0	0	4.90196078431373	0	0
2011/09/05	SW	2	d1		0	0	0	0	0	0	0	0	0	0	0	4.76190476190476	0	0.952380952380952	0	0	0	0	0	0	0	0	0	0	0	0	0	0	0	0	0	0	0	0	0	0	0	0	0	42.8571428571429	0	0	1.9047619047619	0	1.9047619047619
2011/09/05	SW	2	d2		0	0	0	19.4174757281553	0	0	0	0	0	0	0	0	0	0	0	0	0	0	0	0	0	0	0	0	0	0	0	0	0	0	0	0	0	0	0	0	0	0	0	38.8349514563107	0	0	0.970873786407767	0	1.94174757281553
2011/09/05	SW	2	d3		0	0	0	18.6915887850467	0	0	0	0	0	0	0	4.67289719626168	0	0	0	0	0	0	0	0	0	0	0	0	0	0	0	0	0	0	0	0	0	0	0	0	0	0	0	37.3831775700935	0	0	0	0	1.86915887850467
2011/09/05	SW	2	d4		0	0	0	19.8019801980198	0	4.95049504950495	0	0	0	0	0	0	0	0	0	0	0	0	0	0.99009900990099	0	0	0	0	0	0	0	0	0	0	0	0	0	0	0	0	0	0	0	29.7029702970297	0	0	0	0	14.8514851485149
2011/09/05	SW	3	d1		0	0	0	24.5098039215686	0	0.980392156862745	0	0	0	0	0	0	0	4.90196078431373	0	0	0	0	0	0	0	0	0	0	0	0	0	0	0	0	0	0	0	0	0	0	0	0	0	19.6078431372549	0	0	0.980392156862745	0	4.90196078431373
2011/09/05	SW	3	d2		0	0	0	40	0	0	0	0	0	0	0	2	0	0	0	0	0	0	0	0	0	0	0	0	0	0	0	0	0	0	0	0	0	0	0	0	0	0	0	30	0	0	1	0	2
2011/09/05	SW	3	d3		0	0	0	29.7029702970297	0	0.99009900990099	0	0	0	0	0	4.95049504950495	0	1.98019801980198	0	0	0	0	0	0	0	0	0	0	0	0	0	0	0	0	0	0	0	0	0	0	0	0	0	29.7029702970297	0	0	0.99009900990099	0	0
2011/09/05	SW	3	d4		0	0	0	38.0952380952381	0	0	0	0	0	0	0	0	0	4.76190476190476	0	0	0	0	0	0	0	0	0	0	0	0	0	0	0	0	0	0	0	0	0	0	0	2.85714285714286	0	19.047619047619	0	0	4.76190476190476	0	0
2011/09/05	SW	4	d1		0	0	0	44.5544554455446	0	0	0	0	0	0	0	0	0	0	0	0	0	0	0	0	0	0	0	0	0	0	0	0	0	0	0	0	9.9009900990099	0	0	0	0	0	0	14.8514851485149	0	0	0.99009900990099	0	0
2011/09/05	SW	4	d2		0	0	0	49.5049504950495	0	0.99009900990099	0	0	0	0	0	0	0	0	0	0	0	0	0	0	0	0	0	0	0	0	0	0	0	0	0	0	9.9009900990099	0	0	0	0	0	0	24.7524752475248	0	0	0	0	0
2011/09/05	SW	4	d3		0	0	0	0	0	1.98019801980198	0	0	0	0	0	0	0	0	0	0	0	0	0	1.98019801980198	0	0	0	0	0	0	0	0	0	0	0	0	19.8019801980198	0	0	0	0	0	0	34.6534653465347	0	0	0	0	0
2011/09/05	SW	4	d4		0	0	0	0	0	4.95049504950495	0	0	0	0	0	0	0	0	0	0	0	0	0	1.98019801980198	0	0	0	0	0	0	0	0	0	0	0	0	0	0	0	0	0	0	0	39.6039603960396	0	0	0	0	1.98019801980198
2011/09/05	SE	1	d1		0	0	0	29.4117647058824	0	0	0	0	0	0	0	9.80392156862745	0	0	0	0	0	0	0	0	0	0	0	0	0	0	0	0	0	0	0	0	0	0	0	0	0	0	0	29.4117647058824	0	0	0	0	1.96078431372549
2011/09/05	SE	1	d2		0	0	0	19.6078431372549	9.80392156862745	0	0	0	0	0	0	14.7058823529412	0	0	0	0	0	1.96078431372549	0	0	0	0	0	0	0	0	0	0	0	0	0	0	0	0	0	0	0	0	0	29.4117647058824	0	0	0	0	14.7058823529412
2011/09/05	SE	1	d3		0	0	0	33.0188679245283	4.71698113207547	0.943396226415094	0	0	0	0	0	0	0	0	0	0	0	4.71698113207547	0	0	0	0	0	0	0	0	0	0	0	0	0	0	0	0	0	0	0	0	0	33.0188679245283	0	0	4.71698113207547	0	0
2011/09/05	SE	1	d4		0	0	0	40	0	0	0	0	0	0	0	5	0	0	0	0	0	5	0	0	0	0	0	0	0	0	0	0	0	0	0	0	0	0	0	0	0	0	0	20	0	0	5	0	5
2011/09/05	SE	2	d1		0	0	0	60	5	0	0	0	0	0	0	5	0	0	0	0	0	5	0	0	0	0	0	0	0	0	0	0	0	0	0	0	0	0	0	0	0	0	0	15	0	0	0	0	0
2011/09/05	SE	2	d2		0	0	0	55	5	0	0	0	0	0	0	10	0	0	0	0	0	0	0	0	0	0	0	0	0	0	0	0	0	0	0	0	0	0	0	0	0	0	0	15	0	0	0	0	10
2011/09/05	SE	2	d3		0	0	0	40	5	0	0	0	0	0	0	20	0	0	0	0	0	0	0	0	0	0	0	0	0	0	0	0	0	0	0	0	0	0	0	0	0	0	0	15	0	0	0	0	10
2011/09/05	SE	2	d4		0	0	0	60	5	0	0	0	0	0	0	10	0	0	0	0	0	0	0	0	0	0	0	0	0	0	0	0	0	0	0	0	0	0	0	0	0	0	0	20	0	0	0	0	0
2011/09/05	SE	3	d1		0	0	0	19.6078431372549	0	0	0	0	0	0	0	9.80392156862745	0	0	0	0	0	0	0	0	0	0	0	0	0	0	0	0	0	0	0	0	0	0	0	0	0	0	0	49.0196078431373	4.90196078431373	0	0	0	9.80392156862745
2011/09/05	SE	3	d2		0	0	0	18.5185185185185	4.62962962962963	0.925925925925926	0	0	0	0	0	18.5185185185185	0	0	0	0	0	1.85185185185185	0	0	0	0	0	0	0	0	0	0	0	0	0	0	0	0	0	0	0	0	0	32.4074074074074	0	0	0	0	9.25925925925926
2011/09/05	SE	3	d3		0	0	0	0	0	0.961538461538462	0	0	0	0	0	38.4615384615385	0	0	0	0	0	9.61538461538462	0	0	0	0	0	0	0	0	0	0	0	0	0	0	0	0	0	0	0	0	0	9.61538461538462	1.92307692307692	0	0.961538461538462	0	0
2011/09/05	SE	3	d4		0	0	0	39.2156862745098	0	0	0	0	0	0	0	29.4117647058824	0	0	0	0	0	4.90196078431373	0	0	0	0	0	0	0	0	0	0	0	0	0	0	0	0	0	0	0	0	0	9.80392156862745	0	0	0	0	4.90196078431373
2011/09/05	SE	4	d1		0	0	0	19.6078431372549	0	0	1.96078431372549	0	0	0	0	19.6078431372549	0	0	0	0	0	4.90196078431373	0	0	0	0	0	0	0	0	0	0	0	0	0	0	0	0	0	0	0	0	0	29.4117647058824	0	0	0	0	4.90196078431373
2011/09/05	SE	4	d2		0	0	0	40	10	1	0	0	0	0	0	10	0	0	0	0	0	5	0	0	0	0	0	0	0	0	0	0	0	0	0	0	0	0	0	0	0	0	0	25	2	0	2	0	0
2011/09/05	SE	4	d3		0	0	0	29.4117647058824	4.90196078431373	0.980392156862745	0	0	0	0	0	0	0	0	0	0	0	4.90196078431373	0	0	0	0	0	0	0	0	0	0	0	0	0	0	0	0	0	0	0	0	0	19.6078431372549	1.96078431372549	0	0	0	0
2011/09/05	SE	4	d4		0	0	0	40	0	0	0	0	0	0	0	30	0	0	0	0	0	0	0	0	0	0	0	0	0	0	0	0	0	0	0	0	0	0	0	0	0	0	0	10	5	0	0	0	0
2011/09/11	NN1-7	1	d1		0	0	0	29.126213592233	0	0	0	0	0	0.970873786407767	0	0	0	0	0	0	0	0	0	0	0	0	0	0	0	0	0	0	0	0	0	0	0	0	0	0	0	0	0	58.252427184466	0.970873786407767	0	0.970873786407767	0	0
2011/09/11	NN1-7	1	d2		0	0	0	19.8019801980198	0	0	0	0	0	0.99009900990099	0	0	0	0	0	0	0	0	0	0	0	0	0	0	0	0	0	0	0	0	0	0	0	0	0	0	0	0	0	69.3069306930693	0	0	0	0	0
2011/09/11	NN1-7	1	d3		0	0	0	39.6039603960396	0	0	0	0	0	0.99009900990099	0	0	0	0	0	0	0	0	0	0	0	0	0	0	0	0	0	0	0	0	0	0	0	0	0	0	0	0	0	49.5049504950495	0	0	0	0	0
2011/09/11	NN1-7	1	d4		0	0	0	0	1.94174757281553	0	0	0	0	0.970873786407767	0	0	0	0	0	0	0	0	0	0	0	0	0	0	0	0	0	0	0	0	0	0	0	0	0	0	0	0	0	77.6699029126214	0	0	0.970873786407767	0	4.85436893203883
2011/09/11	NN1-7	2	d1		0	0	0	0	0	0	0	0	0	1.01010101010101	0	0	0	0	0	0	0	0	0	0	0	0	0	0	0	0	0	0	0	0	0	0	0	0	0	0	0	0	0	80.8080808080808	1.01010101010101	0	1.01010101010101	0	0
2011/09/11	NN1-7	2	d2		0	0	0	66.0377358490566	0	0.943396226415094	0	0	0	1.88679245283019	0	0	0	0	0	0	0	0	0	0	0	0	0	0	0	0	0	0	0	0	0	0	0	0	0	0	0	0	0	23.5849056603774	0	0	0.943396226415094	0	0.943396226415094
2011/09/11	NN1-7	2	d3		0	0	0	29.4117647058824	0	0	0	0	0	1.96078431372549	0	0	0	0	0	0	0	0	0	0	0	0	0	0	0	0	0	0	0	0	0	0	0	0	0	0	0	0	0	58.8235294117647	0	0	0	0	0
2011/09/11	NN1-7	2	d4		0	0	0	0	4.85436893203883	0	0	0	0	0.970873786407767	0	0	0	0	0	0	0	0	0	0	0	0	0	0	0	0	0	0	0	0	0	0	0	0	0	0	0	0	0	77.6699029126214	0	0	0.970873786407767	0	0.970873786407767
2011/09/11	NN1-7	3	d1		0	0	0	48.5436893203884	0	0	0	0	0	0.970873786407767	0	0	0	0	0	0	0	1.94174757281553	0	0	0	0	0	0	0	0	0	0	0	0	0	0	0	0	0	0	0	0	0	29.126213592233	0	0	0	0	0
2011/09/11	NN1-7	3	d2		0	0	0	66.0377358490566	0	0	0	0	0	0.943396226415094	0	0	0	0	0	0	0	1.88679245283019	0	0	0	0	0	0	0	0	0	0	0	0	0	0	0	0	0	0	0	0	0	14.1509433962264	0	0	0.943396226415094	0	4.71698113207547
2011/09/11	NN1-7	3	d3		0	0	0	14.1509433962264	0	0	0	0	0	0.943396226415094	0	0	0	0	0	0	0	1.88679245283019	0	0	0	0	0	0	0	0	0	0	0	0	0	0	0	0	0	0	0	0	0	66.0377358490566	0	0	0	0	0.943396226415094
2011/09/11	NN1-7	3	d4		0	0	0	35	0	0	0	0	0	0	0	0	0	0	0	0	0	2	0	0	0	0	0	0	0	0	0	0	0	0	0	0	0	0	0	0	0	0	0	55	0	0	2	0	0
2011/09/11	NN1-7	4	d1		0	0	0	77.9816513761468	0	0	0	0	0	1.8348623853211	0	0	0	0	0	0	0	1.8348623853211	0	0	0	0	0	0	0	0	0	0	0	0	0	0	0	0	0	0	0	0	0	18.348623853211	0	0	0	0	0
2011/09/11	NN1-7	4	d2		0	0	0	33.9805825242718	0	0	0	0	0	0.970873786407767	0	0	0	0	0	0	0	1.94174757281553	0	0	0	0	0	0	0	0	0	0	0	0	0	0	0	0	0	0	0	0	0	29.126213592233	0	0	0	0	4.85436893203883
2011/09/11	NN1-7	4	d3		0	0	0	34.3137254901961	0	0	0	0	0	0.980392156862745	0	0	0	0	0	0	0	4.90196078431373	0	0	0	0	0	0	0	0	0	0	0	0	0	0	0	0	0	0	0	0	0	39.2156862745098	0	0	0	0	0.980392156862745
2011/09/11	NN1-7	4	d4		0	0	0	19.4174757281553	0.970873786407767	0	0	0	0	0	0	0	0	0	0	0	0	0	0	0	0	0	0	0	0	0	0	0	0	0	0	0	0	0	0	0	0	0	0	53.3980582524272	0	0	4.85436893203883	0	1.94174757281553
2011/09/11	NN1-7	5	d1		0	0	0	73.7704918032787	0	0.819672131147541	0	0	0	0.819672131147541	0	0	0	0	0	0	0	0	0	0	0	0	0	0	0	0	0	0	0	0	0	0	0	0	0	0	0	0	0	16.3934426229508	0	0	0	0	4.0983606557377
2011/09/11	NN1-7	5	d2		0	0	0	14.4230769230769	0	0	0	0	0	0.961538461538462	0	0	0	0	0	0	0	4.80769230769231	0	0	0	0	0	0	0	0	0	0	0	0	0	0	0	0	0	0	0	0	0	38.4615384615385	0	0	0	0	1.92307692307692
2011/09/11	NN1-7	5	d3		0	0	0	19.2307692307692	1.92307692307692	0.961538461538462	0	0	0	0.961538461538462	0	0	0	0	0	0	0	9.61538461538462	0	0	0	0	0	0	0	0	0	0	0	0	0	0	0	0	0	0	0	0	0	28.8461538461538	0	0	0	0	0
2011/09/11	NN1-7	5	d4		0	0	0	39.2156862745098	0	1.96078431372549	0	0	0	0.980392156862745	0	0	0	0	0	0	0	1.96078431372549	0	0	0	0	0	0	0	0	0	0	0	0	0	0	0	0	0	0	0	0	0	29.4117647058824	0	0	4.90196078431373	0	0
2011/09/11	NN1-7	6	d1		0	0	0	76.9230769230769	0	0.961538461538462	0	0	0	2.88461538461538	0	0	0	0	0	0	0	1.92307692307692	0	0	0	0	0	0	0	0	0	0	0	0	0	0	0	0	0	0	0	0	0	14.4230769230769	0.961538461538462	0	1.92307692307692	0	0
2011/09/11	NN1-7	6	d2		0	0	0	43.2692307692308	0	1.92307692307692	0	0	0	2.88461538461538	0	0	0	0	0	0	0	0	0	0	0	0	0	0	0	0	0	0	0	0	0	0	0	0	0	0	0	0	0	14.4230769230769	1.92307692307692	0	0	0	9.61538461538462
2011/09/11	NN1-7	6	d3		0	0	0	20	0	10	0	0	0	1	0	0	0	0	0	0	0	2	0	0	0	0	0	0	0	0	0	0	0	0	0	0	0	0	0	0	0	0	0	25	2	0	0	0	0
2011/09/11	NN1-7	6	d4		0	0	0	44.1176470588235	0	1.96078431372549	0	0	0	0	0	0	0	0	0	0	0	0	0	0	0	0	0	0	0	0	0	0	0	0	0	0	0	0	0	0	0	0	0	34.3137254901961	0	0	4.90196078431373	0	0
2011/09/13	NN1-7	7	d1		0	0	0	38.4615384615385	1.92307692307692	0	0	0	0	1.92307692307692	0	0	14.4230769230769	0	0	0	0	0	0	0	0	0	0	0	0	0	0	0	0	0	0	0	0	0	0	0	0	0	0	19.2307692307692	0	0	0	0	0
2011/09/13	NN1-7	7	d2		0	0	0	26.7857142857143	0	0	0	0	0	1.78571428571429	0	0	31.25	0	0	0	0	0	0	0	0	0	0	0	0	0	0	0	0	0	0	0	0	0	0	0	0	0	0	17.8571428571429	0	0	0	0	0
2011/09/13	NN1-7	7	d3		0	0	0	24.2718446601942	4.85436893203883	0	0	0	0	0.970873786407767	0	0	0	0	0	0	0	0	0	0	0	0	0	0	0	0	0	0	0	0	0	0	0	0	0	0	0	0	0	29.126213592233	1.94174757281553	0	9.70873786407767	0	0
2011/09/13	NN1-7	7	d4		0	0	0	34.3137254901961	4.90196078431373	0	0	0	0	0.980392156862745	0	0	0	0	0	0	0	0	0	0	0	0	0	0	0	0	0	0	0	0	0.980392156862745	0	0	0	0	0	0	0	0	39.2156862745098	0	0	9.80392156862745	0	0
2011/09/16	NN8-14	8	d1		0	0	0	52.1739130434783	0	0.869565217391304	0	0	0	0.869565217391304	0	0	0	0	0	0	0	1.73913043478261	0	0	0	0	0	0	0	0	0	0	0	0	0	0	0	0	0	0	0	0	0	13.0434782608696	0	0	0.869565217391304	0	4.34782608695652
2011/09/16	NN8-14	8	d2		0	0	0	46.7289719626168	1.86915887850467	0.934579439252336	0	0	0	0.934579439252336	0	0	9.34579439252336	0	0	0	0	0	0	0	0	0	0	0	0	0	0	0	0	0	0	0	0	0	0	0	0	0	0	18.6915887850467	1.86915887850467	4.67289719626168	0.934579439252336	0	0
2011/09/16	NN8-14	8	d3		0	0	0	9.61538461538462	0	0.961538461538462	0	0	0	2.88461538461538	0	0	4.80769230769231	0	0	0	0	0	0	0	0	0	0	0	0	0	0	0	0	0	0	0	0	0	0	0	0	0	0	19.2307692307692	0	0	9.61538461538462	0	19.2307692307692
2011/09/16	NN8-14	8	d4		0	0	0	33.9805825242718	0	1.94174757281553	0	0	0	0.970873786407767	0	0	0	0	0	0	0	14.5631067961165	0	0	0	0	0	0	0	0	0	0	0	0	0	0	0	0	0	0	0	0	0	29.126213592233	0	0	19.4174757281553	0	0
2011/09/16	NN8-14	9	d1		0	0	0	47.8260869565217	1.73913043478261	0.869565217391304	1.73913043478261	0	0	2.60869565217391	0	0	0	0	0	0	0	1.73913043478261	0	0	0	0	0	0	0	0	0	0	0	0	0	0	0	0	0	0	0	0	0	26.0869565217391	0	0	4.34782608695652	0	4.34782608695652
2011/09/16	NN8-14	9	d2		0	0	0	9.70873786407767	1.94174757281553	1.94174757281553	0	0	0	1.94174757281553	0	0	0	0	0	0	0	1.94174757281553	0	0	0	0	0	0	0	0	0	0	0	0	0	0	0	0	0	0	0	0	0	38.8349514563107	0	0	4.85436893203883	0	0
2011/09/16	NN8-14	9	d3		0	0	0	13.8888888888889	1.85185185185185	0	0	0	0	0.925925925925926	0	0	0	0	0	0	0	4.62962962962963	0	0	0	0	0	0	0	0	0	0	0	0	0	0	0	0	0	0	0	0	0	46.2962962962963	0	0	4.62962962962963	0	0
2011/09/16	NN8-14	9	d4		0	0	0	9.61538461538462	0	1.92307692307692	0	0	0	0	0	0	0	0	0	0	0	4.80769230769231	0	0	0	0	0	0	0	0	0	0	0	0	0	0	0	0	0	0	0	0	0	48.0769230769231	1.92307692307692	0	4.80769230769231	0	0
2011/09/16	NN8-14	10	d1		0	0	0	28.8461538461538	0	0.961538461538462	0	0	0	0.961538461538462	0	0	0	0	0	0	0	0	0	0	0	0	0	0	0	0	0	0	0	0	0	0	0	0	0	0	0	0	0	43.2692307692308	0	0	9.61538461538462	0	0
2011/09/16	NN8-14	10	d2		0	0	0	28.5714285714286	0	0	0	0	0	2.85714285714286	0	0	0	0	0	0	0	1.9047619047619	0	0	0	0	0	0	0	0	0	0	0	0	0	0	0	0	0	0	0	0	0	38.0952380952381	0	0	4.76190476190476	0	0
2011/09/16	NN8-14	10	d3		0	0	0	33.0188679245283	0	0.943396226415094	0	0	0	0.943396226415094	0	0	0	0	0	0	0	1.88679245283019	0	0	0	0	0	0	0	0	0	0	0	0	0	0	0	0	0	0	0	0	0	33.0188679245283	0	0	4.71698113207547	0	0
2011/09/16	NN8-14	10	d4		0	0	0	40	0	1	0	0	0	0	0	0	0	0	0	0	0	5	0	0	0	0	0	0	0	0	0	0	0	0	0	0	0	0	0	0	0	0	0	30	0	0	10	0	2
2011/09/16	NN8-14	11	d1		0	0	0	9.70873786407767	0	0	0	0	0	2.9126213592233	0	0	0	0	0	0	0	0	0	0	0	0	0	0	0	0	0	0	0	0	0	0	0	0	0	0	0	0	0	48.5436893203884	0	0	9.70873786407767	0	0
2011/09/16	NN8-14	11	d2		0	0	0	14.4230769230769	0	0	0	0	0	2.88461538461538	0	0	0	0	0	0	0	0	0	0	0	0	0	0	0	0	0	0	0	0	0	0	9.61538461538462	0	0	0	0	0	0	43.2692307692308	0	0	4.80769230769231	0	0
2011/09/16	NN8-14	11	d3		0	0	0	28.8461538461538	0	0	0	0	0	2.88461538461538	0	0	0	0	0	0	0	0	0	0	0	0	0	0	0	0	0	0	0	0	0	0	0	0	0	0	0	0	0	38.4615384615385	0	0	9.61538461538462	0	0
2011/09/16	NN8-14	11	d4		0	0	0	19.2307692307692	0	0	0	0	0	1.92307692307692	0	0	0	0	0	0	0	0	0	0	0	0	0	0	0	0	0	0	0	0	0	0	0	0	0	0	0	0	0	38.4615384615385	0	0	19.2307692307692	0	1.92307692307692
2011/09/16	NN8-14	12	d1		0	0	0	19.047619047619	0	0	0	0	0	2.85714285714286	0	0	0	0	0	0	0	0	0	0	0	0	0	0	0	0	0	0	0	0	0	0	0	0	0	0	0	0	0	57.1428571428571	0	4.76190476190476	4.76190476190476	0	0
2011/09/16	NN8-14	12	d2		0	0	0	0	0	0	0	0	0	2.85714285714286	0	0	0	0	0	0	0	0	0	0	0	0	0	0	0	0	0	0	0	0	0	0	0	0	0	0	0	0	0	61.9047619047619	0	0	4.76190476190476	0	0
2011/09/16	NN8-14	12	d3		0	0	0	38.4615384615385	0	0	0	0	0	1.92307692307692	0	0	0	0	0	0	0	1.92307692307692	0	0	0	0	0	0	0	0	0	0	0	0	0	0	0	0	0	0	0	0	0	38.4615384615385	0	0	4.80769230769231	0	0
2011/09/16	NN8-14	12	d4		0	0	0	14.4230769230769	0	1.92307692307692	0	0	0	2.88461538461538	0	0	0	0	0	0	0	1.92307692307692	0	0	0	0	0	0	0	0	0	0	0	0	0	0	0	0	0	0	0	0	0	38.4615384615385	0	0	14.4230769230769	0	0
2011/09/16	NN8-14	13	d1		0	0	0	60.7476635514019	1.86915887850467	0	1.86915887850467	0	0	2.80373831775701	0	0	0	0	0	0	0	4.67289719626168	0	0	0	0	0	0	0	0	0	0	0	0	0	0	0	0	0	0	0	0	0	14.018691588785	0	0	9.34579439252336	0	0
2011/09/16	NN8-14	13	d2		0	0	0	36.3636363636364	0	0	0	0	0	0.909090909090909	0	0	0	0	0	0	0	0	0	0	0	0	0	0	0	0	0	0	0	0	0	0	18.1818181818182	0	1.81818181818182	0	0	0	0	18.1818181818182	0	0	18.1818181818182	0	4.54545454545455
2011/09/16	NN8-14	13	d3		0	0	0	0	0	0	0	0	0	2.85714285714286	0	0	0	0	0	0	0	19.047619047619	0	0	0	0	0	0	0	0	0	0	0	0	0	0	0	0	9.52380952380952	0	0	0	0	38.0952380952381	0	0	19.047619047619	0	0
2011/09/16	NN8-14	13	d4		0	0	0	4.54545454545455	0	0	0	0	0	2.72727272727273	0	0	0	0	0	0	0	18.1818181818182	0	0	0	0	0	0	0	0	0	0	0	0	0	0	0	0	4.54545454545455	0	0	0	0	22.7272727272727	1.81818181818182	0	36.3636363636364	0	4.54545454545455
2011/09/16	NN8-14	14	d1		0	0	0	47.6190476190476	3.96825396825397	0	1.58730158730159	0	0	1.58730158730159	0	0	0	0	0	0	0	11.9047619047619	0	0	0	0	0	0	0	0	0	0	0	0	1.58730158730159	0	0	0	3.96825396825397	0	0	0	0	11.9047619047619	0	0	15.8730158730159	0	0
2011/09/16	NN8-14	14	d2		0	0	0	38.8349514563107	9.70873786407767	0	0	0	0	2.9126213592233	0	0	0	0	0	0	0	0	0	0	0	0	0	0	0	0	0	0	0	0	4.85436893203883	0	0	0	0	0	0	0	0	14.5631067961165	0	0	29.126213592233	0	0
2011/09/16	NN8-14	14	d3		0	0	0	29.126213592233	0	0	0	0	0	1.94174757281553	0	0	0	0	0	0	0	4.85436893203883	0	0	0	0	0	0	0	0	0	0	0	0	0.970873786407767	0	0	0	4.85436893203883	0	0	0	0	9.70873786407767	0	0	48.5436893203884	0	0
2011/09/16	NN8-14	14	d4		0	0	0	0	0	0	0	0	0	0.970873786407767	0	0	0	0	0	0	0	9.70873786407767	0	0	0	0	0	0	0	0	0	0	0	0	0	0	43.6893203883495	0	0	0	0	0	0	9.70873786407767	0	0	29.126213592233	0	0
2011/09/19	SW	1	d1		0	0	0	24.7524752475248	0	0	0	0	0	0.99009900990099	0	0	0	0	0	0	0	0	0	0	0	0	0	0	0	0	0	0	0	0	0	0	0	0	0	0	0	0	0	59.4059405940594	0	0	4.95049504950495	0	0
2011/09/19	SW	1	d2		0	0	0	23.5849056603774	0	0	0	0	0	0.943396226415094	0	9.43396226415094	0	0	0	0	0	0	0	0	0	0	0	0	0	0	0	0	0	0	0	0	0	0	0	0	0	0	0	47.1698113207547	0	0	4.71698113207547	0	0
2011/09/19	SW	1	d3		0	0	0	19.6078431372549	0	0	0	0	0	1.96078431372549	0	0	0	4.90196078431373	0	0	0	0	0	0	0	0	0	0	0	0	0	0	0	0	0	0	0	0	0	0	0	0	0	49.0196078431373	0	0	4.90196078431373	0	0
2011/09/19	SW	1	d4		0	0	0	39.2156862745098	0	0	0	0	0	1.96078431372549	0	0	0	0	0	0	0.980392156862745	0	0	0	0	0	0	0	0	0	0	0	0	0	0	0	0	0	0	0	0	0	0	39.2156862745098	0	1.96078431372549	4.90196078431373	0	0
2011/09/19	SW	2	d1		0	0	0	0	0	0	0	0	0	1.9047619047619	0	4.76190476190476	0	0	0	0	0	0	0	0	0	0	0	0	0	0	0	0	0	0	0	0	0	0	0	0	0	0	0	42.8571428571429	1.9047619047619	0	1.9047619047619	0	1.9047619047619
2011/09/19	SW	2	d2		0	0	0	28.5714285714286	0	0	0	0	0	2.85714285714286	0	0	0	0	0	0	0	0	0	0	0	0	0	0	0	0	0	0	0	0	0	0	0	0	0	0	0	0	0	38.0952380952381	0	0	4.76190476190476	0	1.9047619047619
2011/09/19	SW	2	d3		0	0	0	20	0	0	0	0	0	1	0	10	0	0	0	0	0	0	0	0	0	0	0	0	0	0	0	0	0	0	0	0	0	0	0	0	0	0	0	40	0	0	2	0	0
2011/09/19	SW	2	d4		0	0	0	20.6185567010309	0	1.03092783505155	0	0	0	1.03092783505155	0	0	0	0	0	0	0	0	0	0	0	0	0	0	0	0	0	0	0	0	0	0	0	0	0	0	0	0	0	46.3917525773196	0	0	5.15463917525773	0	5.15463917525773
2011/09/19	SW	3	d1		0	0	0	18.1818181818182	0	0	0	0	0	2.72727272727273	0	0	0	4.54545454545455	0	0	0	0	0	0	0	0	0	0	0	0	0	0	0	0	0	0	0	0	0	0	0	0	0	36.3636363636364	0	0	1.81818181818182	0	0
2011/09/19	SW	3	d2		0	0	0	37.3831775700935	0	0	0	0	0	2.80373831775701	0	1.86915887850467	0	1.86915887850467	0	0	0	0	0	0	0	0	0	0	0	0	0	0	0	0	0	0	0	0	0	0	0	0	0	28.0373831775701	0	0	0	0	0
2011/09/19	SW	3	d3		0	0	0	28.5714285714286	0	0.952380952380952	0	0	0	1.9047619047619	0	4.76190476190476	0	1.9047619047619	0	0	0	0	0	0	0	0	0	0	0	0	0	0	0	0	0	0	0	0	0	0	0	0	0	38.0952380952381	0	0	0	0	0
2011/09/19	SW	3	d4		0	0	0	40.4040404040404	0	0	0	0	0	2.02020202020202	0	0	0	10.1010101010101	0	0	0	0	0	0	0	0	0	0	0	0	0	0	0	0	0	0	0	0	0	0	0	2.02020202020202	0	35.3535353535354	0	0	5.05050505050505	0	0
2011/09/19	SW	4	d1		0	0	0	39.6039603960396	0	0	0	0	0	0.99009900990099	0	0	0	0	0	0	0	0	0	0	0	0	0	0	0	0	0	0	0	0	0	0	14.8514851485149	0	0	0	0	0	0	29.7029702970297	0	0	0	0	0
2011/09/19	SW	4	d2		0	0	0	59.4059405940594	0	0	0	0	0	0.99009900990099	0	0	0	0	0	0	0	0	0	0	0	0	0	0	0	0	0	0	0	0	0	0	4.95049504950495	0	0	0	0	0	0	0	0	24.7524752475248	0	0	0
2011/09/19	SW	4	d3		0	0	0	0	0	1.03092783505155	0	0	0	1.03092783505155	0	0	0	0	0	0	0	0	0	2.06185567010309	0	0	0	0	0	0	0	0	0	0	0	0	10.3092783505155	0	0	0	0	0	0	51.5463917525773	0	0	2.06185567010309	0	0
2011/09/19	SW	4	d4		0	0	0	1.01010101010101	0	1.01010101010101	0	0	0	1.01010101010101	0	0	0	0	0	0	0	0	0	2.02020202020202	0	0	0	0	0	0	0	0	0	0	0	0	0	0	0	0	0	0	0	60.6060606060606	0	0	0	0	0
2011/09/19	SE	1	d1		0	0	0	39.2156862745098	0	0	0	0	0	2.94117647058824	0	4.90196078431373	0	0	0	0	0	1.96078431372549	0	0	0	0	0	0	0	0	0	0	0	0	0	0	0	0	0	0	0	0	0	29.4117647058824	1.96078431372549	0	0	0	0
2011/09/19	SE	1	d2		0	0	0	28.8461538461538	4.80769230769231	0	0	0	0	1.92307692307692	0	0	0	0	0	0	0	9.61538461538462	0	0	0	0	0	0	0	0	0	0	0	0	0	0	0	0	0	0	0	0	0	19.2307692307692	1.92307692307692	0	0	0	0
2011/09/19	SE	1	d3		0	0	0	33.6538461538462	4.80769230769231	0	0	0	0	1.92307692307692	0	0	0	0	0	0	0	4.80769230769231	0	0	0	0	0	0	0	0	0	0	0	0	0	0	0	0	0	0	0	0	0	28.8461538461538	0	0	1.92307692307692	0	4.80769230769231
2011/09/19	SE	1	d4		0	0	0	33.0188679245283	0	0	0	0	0	1.88679245283019	0	4.71698113207547	0	0	0	0	0	4.71698113207547	0	0	0	0	0	0	0	0	0	0	0	0	0	0	0	0	0	0	0	0	0	28.3018867924528	1.88679245283019	0	4.71698113207547	0	1.88679245283019
2011/09/19	SE	2	d1		0	0	0	51.4018691588785	0	0	0	0	0	2.80373831775701	0	4.67289719626168	0	0	0	0	0	4.67289719626168	0	0	0	0	0	0	0	0	0	0	0	0	0	0	0	0	0	0	0	0	0	18.6915887850467	1.86915887850467	0	0	0	0
2011/09/19	SE	2	d2		0	0	0	38.8349514563107	4.85436893203883	0	0	0	0	0.970873786407767	0	4.85436893203883	0	0	0	0	0	0	0	0	0	0	0	0	0	0	0	0	0	0	0	0	0	0	0	0	0	0	0	29.126213592233	0	0	1.94174757281553	0	9.70873786407767
2011/09/19	SE	2	d3		0	0	0	33.9805825242718	4.85436893203883	0	0	0	0	1.94174757281553	0	4.85436893203883	0	0	0	0	0	0	0	0	0	0	0	0	0	0	0	0	0	0	0	0	0	0	0	0	0	0	0	29.126213592233	1.94174757281553	0	1.94174757281553	0	9.70873786407767
2011/09/19	SE	2	d4		0	0	0	45.4545454545455	1.01010101010101	0	0	0	0	1.01010101010101	0	10.1010101010101	0	0	0	0	0	0	0	0	0	0	0	0	0	0	0	0	0	0	0	0	0	0	0	0	0	0	0	30.3030303030303	0	0	2.02020202020202	0	0
2011/09/19	SE	3	d1		0	0	0	28.8461538461538	0	0	0	0	0	1.92307692307692	0	19.2307692307692	0	0	0	0	0	0	0	0	0	0	0	0	0	0	0	0	0	0	0	0	0	0	0	0	0	0	0	28.8461538461538	1.92307692307692	0	0	0	4.80769230769231
2011/09/19	SE	3	d2		0	0	0	20.4081632653061	10.2040816326531	0	0	0	0	1.02040816326531	0	5.10204081632653	0	0	0	0	0	0	0	0	0	0	0	0	0	0	0	0	0	0	0	0	0	0	0	0	0	0	0	10.2040816326531	0	0	0	0	15.3061224489796
2011/09/19	SE	3	d3		0	0	0	0	1.9047619047619	0	0	0	0	2.85714285714286	0	28.5714285714286	0	0	0	0	0	4.76190476190476	0	0	0	0	0	0	0	0	0	0	0	0	0	0	0	0	0	0	0	0	0	19.047619047619	0	0	0	0	0
2011/09/19	SE	3	d4		0	0	0	38.4615384615385	1.92307692307692	0	0	0	0	0	0	19.2307692307692	0	0	0	0	0	1.92307692307692	0	0	0	0	0	0	0	0	0	0	0	0	0	0	0	0	0	0	0	0	0	9.61538461538462	4.80769230769231	0	0	0	0
2011/09/19	SE	4	d1		0	0	0	28.0373831775701	0	0.934579439252336	1.86915887850467	0	0	2.80373831775701	0	4.67289719626168	0	0	0	0	0	4.67289719626168	0	0	0	0	0	0	0	0	0	0	0	0	0	0	0	0	0	0	0	0	0	37.3831775700935	0	0	0	0	1.86915887850467
2011/09/19	SE	4	d2		0	0	0	43.6893203883495	4.85436893203883	0	0	0	0	1.94174757281553	0	4.85436893203883	0	0	0	0	0	1.94174757281553	0	0	0	0	0	0	0	0	0	0	0	0	0	0	0	0	0	0	0	0	0	29.126213592233	1.94174757281553	0	0	0	0
2011/09/19	SE	4	d3		0	0	0	34.3137254901961	0	0.980392156862745	0	0	0	1.96078431372549	0	9.80392156862745	0	0	0	0	0	4.90196078431373	0	0	0	0	0	0	0	0	0	0	0	0	0	0	0	0	0	0	0	0	0	29.4117647058824	1.96078431372549	0	0	0	0
2011/09/19	SE	4	d4		0	0	0	40.4040404040404	0	1.01010101010101	0	0	0	1.01010101010101	0	30.3030303030303	0	0	0	0	0	0	0	0	0	0	0	0	0	0	0	0	0	0	0	0	0	0	0	0	0	0	0	20.2020202020202	2.02020202020202	0	0	0	0
2011/09/22	NN1-7	1	d1		0	0	0	24.5098039215686	0	0	0	0	0	1.96078431372549	0	0	0	0	0	0	0	0	0	0	0	0	0	0	0	0	0	0	0	0	0	0	0	0	0	0	0	0	0	58.8235294117647	4.90196078431373	0	0	0	0
2011/09/22	NN1-7	1	d2		0	0	0	19.4174757281553	0	0	0	0	0	0	0	0	0	0	0	0	0	0	0	0	0	0	0	0	0	0	0	0	0	0	0	0	0	0	0	0	0	0	0	67.9611650485437	0	0	0.970873786407767	0	0
2011/09/22	NN1-7	1	d3		0	0	0	29.126213592233	0	0	0	0	0	0.970873786407767	0	0	0	0	0	0	0	0	0	0	0	0	0	0	0	0	0	0	0	0	0	0	0	0	0	0	0	0	0	58.252427184466	0	0	0	0	0
2011/09/22	NN1-7	1	d4		0	0	0	0	0.943396226415094	0	0	0	0	0.943396226415094	0	0	0	0	0	0	0	0	0	0	0	0	0	0	0	0	0	0	0	0	0	0	0	0	0	0	0	0	0	84.9056603773585	1.88679245283019	0	0	0	4.71698113207547
2011/09/22	NN1-7	2	d1		0	0	0	0	0	0	0	0	0	1.98019801980198	0	0	0	0	0	0	0	0	0	0	0	0	0	0	0	0	0	0	0	0	0	0	0	0	0	0	0	0	0	79.2079207920792	1.98019801980198	0	0	0	0
2011/09/22	NN1-7	2	d2		0	0	0	28.8461538461538	0	0	0	0	0	1.92307692307692	0	0	0	0	0	0	0	0	0	0	0	0	0	0	0	0	0	0	0	0	0	0	0	0	0	0	0	0	0	57.6923076923077	0	0	4.80769230769231	0	0
2011/09/22	NN1-7	2	d3		0	0	0	19.4174757281553	0	0	0	0	0	2.9126213592233	0	0	0	0	0	0	0	0	0	0	0	0	0	0	0	0	0	0	0	0	0	0	0	0	0	0	0	0	0	67.9611650485437	0	0	0	0	0
2011/09/22	NN1-7	2	d4		0	0	0	0	1.9047619047619	0	0	0	0	2.85714285714286	0	0	0	0	0	0	0	0	0	0	0	0	0	0	0	0	0	0	0	0	0	0	0	0	0	0	0	0	0	85.7142857142857	0	0	0	0	0
2011/09/22	NN1-7	3	d1		0	0	0	24.5098039215686	0	0	0	0	0	1.96078431372549	0	0	0	0	0	0	0	0	0	0	0	0	0	0	0	0	0	0	0	0	0	0	0	0	0	0	0	0	0	49.0196078431373	0	0	0	0	4.90196078431373
2011/09/22	NN1-7	3	d2		0	0	0	28.8461538461538	0	0	0	0	0	1.92307692307692	0	0	0	0	0	0	0	1.92307692307692	0	0	0	0	0	0	0	0	0	0	0	0	0	0	0	0	0	0	0	0	0	38.4615384615385	0	0	0	0	0
2011/09/22	NN1-7	3	d3		0	0	0	9.9009900990099	0	0	0	0	0	0.99009900990099	0	0	0	0	0	0	0	0	0	0	0	0	0	0	0	0	0	0	0	0	0	0	0	0	0	0	0	0	0	29.7029702970297	0	0	0	0	4.95049504950495
2011/09/22	NN1-7	3	d4		0	0	0	14.4230769230769	0	0	0	0	0	0	0	0	0	0	0	0	0	1.92307692307692	0	0	0	0	0	0	0	0	0	0	0	0	0	0	0	0	0	0	0	0	0	67.3076923076923	0	0	1.92307692307692	0	4.80769230769231
2011/09/22	NN1-7	4	d1		0	0	0	58.8235294117647	0	0	0	0	0	1.96078431372549	0	0	0	0	0	0	0	0	0	0	0	0	0	0	0	0	0	0	0	0	0	0	0	0	0	0	0	0	0	29.4117647058824	0	0	0	0	0
2011/09/22	NN1-7	4	d2		0	0	0	23.3644859813084	0	0	0	0	0	2.80373831775701	0	0	0	0	0	0	0	1.86915887850467	0	0	0	0	0	0	0	0	0	0	0	0	0	0	0	0	0	0	0	0	0	18.6915887850467	0	0	0	0	0
2011/09/22	NN1-7	4	d3		0	0	0	33.6538461538462	0	0	0	0	0	1.92307692307692	0	0	0	0	0	0	0	1.92307692307692	0	0	0	0	0	0	0	0	0	0	0	0	0	0	0	0	0	0	0	0	0	28.8461538461538	0	0	0	0	0
2011/09/22	NN1-7	4	d4		0	0	0	15.3061224489796	0	0	0	0	0	1.02040816326531	0	0	0	0	0	0	0	2.04081632653061	0	0	0	0	0	0	0	0	0	0	0	0	0	0	0	0	0	0	0	0	0	45.9183673469388	0	0	5.10204081632653	0	0
2011/09/22	NN1-7	5	d1		0	0	0	60	0	0	0	0	0	0	0	0	0	0	0	0	0	0	0	0	0	0	0	0	0	0	0	0	0	0	0	0	0	0	0	0	0	0	0	20	0	0	0	0	5
2011/09/22	NN1-7	5	d2		0	0	0	9.80392156862745	0	0	0	0	0	0.980392156862745	0	0	0	0	0	0	0	1.96078431372549	0	0	0	0	0	0	0	0	0	0	0	0	0	0	0	0	0	0	0	0	0	19.6078431372549	0	0	0	0	1.96078431372549
2011/09/22	NN1-7	5	d3		0	0	0	9.80392156862745	0	0	0	0	0	1.96078431372549	0	0	0	0	0	0	0	4.90196078431373	0	0	0	0	0	0	0	0	0	0	0	0	0	0	0	0	0	0	0	0	0	29.4117647058824	0	0	0	0	0
2011/09/22	NN1-7	5	d4		0	0	0	27.1739130434783	0	0	0	0	0	1.08695652173913	0	0	0	0	0	0	0	2.17391304347826	0	0	0	0	0	0	0	0	0	0	0	0	0	0	0	0	0	0	0	0	0	32.6086956521739	0	0	2.17391304347826	0	0
2011/09/22	NN1-7	6	d1		0	0	0	57.6923076923077	0	0	0	0	0	1.92307692307692	0	0	0	0	0	0	0	0	0	0	0	0	0	0	0	0	0	0	0	0	0	0	0	0	0	0	0	0	0	14.4230769230769	0	0	1.92307692307692	0	0
2011/09/22	NN1-7	6	d2		0	0	0	24.2718446601942	0	0	0	0	0	2.9126213592233	0	0	0	0	0	0	0	0	0	0	0	0	0	0	0	0	0	0	0	0	0	0	0	0	0	0	0	0	0	19.4174757281553	0	0	0	0	0
2011/09/22	NN1-7	6	d3		0	0	0	18.6915887850467	0	0	0	0	0	2.80373831775701	0	0	0	0	0	0	0	1.86915887850467	0	0	0	0	0	0	0	0	0	0	0	0	0	0	0	0	0	0	0	0	0	18.6915887850467	0	0	1.86915887850467	0	0
2011/09/22	NN1-7	6	d4		0	0	0	29.7029702970297	0	0	0	0	0	0.99009900990099	0	0	0	0	0	0	0	0	0	0	0	0	0	0	0	0	0	0	0	0	0	0	0	0	0	0	0	0	0	49.5049504950495	0	0	4.95049504950495	0	0
2011/09/23	NN1-7	7	d1		0	0	0	18.8679245283019	4.71698113207547	0	0	0	0	0.943396226415094	0	18.8679245283019	0	0	0	0	0	0	0	0	0	0	0	0	0	0	0	0	0	0	0	0	0	0	0	0	0	0	0	9.43396226415094	0	0	4.71698113207547	0	4.71698113207547
2011/09/23	NN1-7	7	d2		0	0	0	14.2857142857143	0	0	0	0	0	2.85714285714286	0	33.3333333333333	0	0	0	0	0	0	0	0	0	0	0	0	0	0	0	0	0	0	0	0	0	0	0	0	0	0	0	4.76190476190476	0	0	4.76190476190476	0	1.9047619047619
2011/09/23	NN1-7	7	d3		0	0	0	9.52380952380952	1.9047619047619	0	0	0	0	2.85714285714286	0	33.3333333333333	0	0	0	0	0	0	0	0	0	0	0	0	0	0	0	0	0	0	0	0	0	0	0	0	0	0	0	14.2857142857143	0	0	4.76190476190476	0	9.52380952380952
2011/09/23	NN1-7	7	d4		0	0	0	18.8679245283019	1.88679245283019	0	0	0	0	1.88679245283019	0	0	0	0	0	0	0	0	0	0	0	0	0	0	0	0	0	0	0	0	0	0	0	0	0	0	0	0	0	37.7358490566038	0	0	23.5849056603774	0	0
2011/09/23	NN8-14	8	d1		0	0	0	49.0196078431373	0	0	0	0	0	1.96078431372549	0	0	0	0	0	0	0	0	0	0	0	0	0	0	0	0	0	0	0	0	0	0	0	0	0	0	0	0	0	29.4117647058824	0	0	0	0	0
2011/09/23	NN8-14	8	d2		0	0	0	34.6534653465347	0	0	0	0	0	0.99009900990099	0	14.8514851485149	0	0	0	0	0	0	0	0	0	0	0	0	0	0	0	0	0	0	0	0	0	0	0	0	0	0	0	19.8019801980198	4.95049504950495	4.95049504950495	4.95049504950495	0	0
2011/09/23	NN8-14	8	d3		0	0	0	9.34579439252336	0	0	0	0	0	1.86915887850467	0	14.018691588785	0	0	0	0	0	0	0	0	0	0	0	0	0	0	0	0	0	0	0	0	0	0	0	0	0	0	0	18.6915887850467	0	0	18.6915887850467	0	14.018691588785
2011/09/23	NN8-14	8	d4		0	0	0	24.5098039215686	0	0	0	0	0	1.96078431372549	0	0	0	0	0	0	0	9.80392156862745	0	0	0	0	0	0	0	0	0	0	0	0	0	0	0	0	0	0	0	0	0	29.4117647058824	0	0	29.4117647058824	0	0
2011/09/23	NN8-14	9	d1		0	0	0	38.0952380952381	1.9047619047619	0	0	0	0	2.85714285714286	0	0	0	0	0	0	0	0	0	0	0	0	0	0	0	0	0	0	0	0	0	0	0	0	0	0	0	0	0	42.8571428571429	0	0	4.76190476190476	0	0
2011/09/23	NN8-14	9	d2		0	0	0	14.5631067961165	0	0	0	0	0	0.970873786407767	0	0	0	0	0	0	0	0	0	0	0	0	0	0	0	0	0	0	0	0	0	0	0	0	0	0	0	0	0	48.5436893203884	0	0	14.5631067961165	0	1.94174757281553
2011/09/23	NN8-14	9	d3		0	0	0	14.8514851485149	0	0	0	0	0	0.99009900990099	0	0	0	0	0	0	0	0	0	0	0	0	0	0	0	0	0	0	0	0	0	0	0	0	0	0	0	0	0	49.5049504950495	0	0	19.8019801980198	0	0
2011/09/23	NN8-14	9	d4		0	0	0	14.8514851485149	0	0	0	0	0	0	0	0	0	0	0	0	0	1.98019801980198	0	0	0	0	0	0	0	0	0	0	0	0	0	0	0	0	0	0	0	0	0	39.6039603960396	1.98019801980198	0	19.8019801980198	0	0
2011/09/23	NN8-14	10	d1		0	0	0	29.126213592233	0	0	0	0	0	0.970873786407767	0	0	0	0	0	0	0	0	0	0	0	0	0	0	0	0	0	0	0	0	0	0	0	0	0	0	0	0	0	48.5436893203884	0	0	19.4174757281553	0	0
2011/09/23	NN8-14	10	d2		0	0	0	29.4117647058824	0	0	0	0	0	1.96078431372549	0	0	0	0	0	0	0	0	0	0	0	0	0	0	0	0	0	0	0	0	0	0	0	0	0	0	0	0	0	49.0196078431373	0	0	14.7058823529412	0	0
2011/09/23	NN8-14	10	d3		0	0	0	19.8019801980198	0	0	0	0	0	0.99009900990099	0	0	0	0	0	0	0	0	0	0	0	0	0	0	0	0	0	0	0	0	0	0	0	0	0	0	0	0	0	49.5049504950495	0	0	14.8514851485149	0	0
2011/09/23	NN8-14	10	d4		0	0	0	25	0	0	0	0	0	0	0	0	0	0	0	0	0	0	0	0	0	0	0	0	0	0	0	0	0	0	0	0	0	0	0	0	0	0	0	30	0	0	35	0	0
2011/09/23	NN8-14	11	d1		0	0	0	14.7058823529412	0	0	0	0	0	1.96078431372549	0	0	0	0	0	0	0	0	0	0	0	0	0	0	0	0	0	0	0	0	0	0	0	0	0	0	0	0	0	58.8235294117647	0	0	9.80392156862745	0	0
2011/09/23	NN8-14	11	d2		0	0	0	14.5631067961165	0	0	0	0	0	2.9126213592233	0	0	0	0	0	0	0	0	0	0	0	0	0	0	0	0	0	0	0	0	0	0	0	0	0	0	0	0	0	63.1067961165049	0	0	9.70873786407767	0	0
2011/09/23	NN8-14	11	d3		0	0	0	19.4174757281553	0	0	0	0	0	2.9126213592233	0	0	0	0	0	0	0	0	0	0	0	0	0	0	0	0	0	0	0	0	0	0	0	0	0	0	0	0	0	53.3980582524272	0	0	14.5631067961165	0	0
2011/09/23	NN8-14	11	d4		0	0	0	9.9009900990099	0	0	0	0	0	0.99009900990099	0	0	0	0	0	0	0	0	0	0	0	0	0	0	0	0	0	0	0	0	0	0	0	0	0	0	0	0	0	39.6039603960396	0	0	19.8019801980198	0	0
2011/09/23	NN8-14	12	d1		0	0	0	9.52380952380952	0	0	0	0	0	2.85714285714286	0	0	0	0	0	0	0	0	0	0	0	0	0	0	0	0	0	0	0	0	0	0	0	0	0	0	0	0	0	61.9047619047619	0	1.9047619047619	9.52380952380952	0	0
2011/09/23	NN8-14	12	d2		0	0	0	0	0	0	0	0	0	1.96078431372549	0	0	0	0	0	0	0	0	0	0	0	0	0	0	0	0	0	0	0	0	0	0	0	0	0	0	0	0	0	78.4313725490196	0	0	9.80392156862745	0	0
2011/09/23	NN8-14	12	d3		0	0	0	14.5631067961165	0	0	0	0	0	2.9126213592233	0	0	0	0	0	0	0	4.85436893203883	0	0	0	0	0	0	0	0	0	0	0	0	0	0	0	0	0	0	0	0	0	58.252427184466	0	0	9.70873786407767	0	0
2011/09/23	NN8-14	12	d4		0	0	0	9.52380952380952	0	0	0	0	0	2.85714285714286	0	0	0	0	0	0	0	0	0	0	0	0	0	0	0	0	0	0	0	0	0	0	0	0	0	0	0	0	0	52.3809523809524	1.9047619047619	0	19.047619047619	0	0
2011/09/23	NN8-14	13	d1		0	0	0	18.5185185185185	0	0	1.85185185185185	0	0	0.925925925925926	0	0	0	0	0	0	0	0	0	0	0	0	0	0	0	0	0	0	0	0	4.62962962962963	0	0	0	0	0	0	0	0	32.4074074074074	0	0	27.7777777777778	0	0
2011/09/23	NN8-14	13	d2		0	0	0	9.70873786407767	0	0	0	0	0	0.970873786407767	0	0	0	0	0	0	0	0	0	0	0	0	0	0	0	0	0	0	0	0	1.94174757281553	0	0	0	0	0	0	0	0	53.3980582524272	0	0	14.5631067961165	0	4.85436893203883
2011/09/23	NN8-14	13	d3		0	0	0	0	0	0	0	0	0	2.85714285714286	0	0	0	0	0	0	0	4.76190476190476	0	0	0	0	0	0	0	0	0	0	0	0	0	0	0	0	4.76190476190476	0	0	0	0	52.3809523809524	0	0	28.5714285714286	0	4.76190476190476
2011/09/23	NN8-14	13	d4		0	0	0	0	0	0	0	0	0	0	0	0	0	0	0	0	0	9.52380952380952	0	0	0	0	0	0	0	0	0	0	0	0	0	0	0	0	4.76190476190476	0	0	0	0	38.0952380952381	0	0	42.8571428571429	0	4.76190476190476
2011/09/23	NN8-14	14	d1		0	0	0	19.4174757281553	0	0	0	0	0	0.970873786407767	0	0	0	0	0	0	0	9.70873786407767	0	0	0	0	0	0	0	0	0	0	0	0	4.85436893203883	0	0	0	1.94174757281553	0	0	0	0	19.4174757281553	0	0	38.8349514563107	0	0
2011/09/23	NN8-14	14	d2		0	0	0	14.2857142857143	4.76190476190476	0	0	0	0	0.952380952380952	0	0	0	0	0	0	0	1.9047619047619	0	0	0	0	0	0	0	0	0	0	0	0	4.76190476190476	0	0	0	0	0	0	0	0	28.5714285714286	0	0	42.8571428571429	0	1.9047619047619
2011/09/23	NN8-14	14	d3		0	0	0	10	0	0	0	0	0	0	0	0	0	0	0	0	0	10	0	0	0	0	0	0	0	0	0	0	0	0	0	0	0	0	5	0	0	0	0	15	0	0	60	0	0
2011/09/23	NN8-14	14	d4		0	0	0	0	0	0	0	0	0	0	0	0	0	0	0	0	0	10	0	0	0	0	0	0	0	0	0	0	0	0	0	0	45	0	0	0	0	0	0	20	0	0	25	0	0
2011/09/28	SW	1	d1		0	0	0	24.0384615384615	0	0	0	0	0	1.92307692307692	0	0	0	0	0	0	0	0	0	0	0	0	0	0	0	0	0	0	0	0	0	0	0	0	4.80769230769231	0	0	0	0	43.2692307692308	0	0	4.80769230769231	0	0.961538461538462
2011/09/28	SW	1	d2		0	0	0	21.4953271028037	0	0	0	0	0	0.934579439252336	0	12.1495327102804	0	0	0	0	0	0	0	0	0	0	0	0	0	0	0	0	0	0	0	0	0	0	4.67289719626168	0	0	0	0	40.1869158878505	0	0	3.73831775700935	0	0
2011/09/28	SW	1	d3		0	0	0	12.3809523809524	0	0	0	0	0	1.9047619047619	0	0	0	3.80952380952381	0	0	0	0	0	0	0	0	0	0	0	0	0	0	0	0	0	0	0	0	4.76190476190476	0	0	0	0	45.7142857142857	0	0	4.76190476190476	0	0
2011/09/28	SW	1	d4		0	0	0	29.126213592233	0	0	0	0	0	0.970873786407767	0	0	0	0	0	0	0.970873786407767	0	0	0	0	0	0	0	0	0	0	0	0	0	0	0	0	0	4.85436893203883	0	0	0	0	38.8349514563107	0	0.970873786407767	4.85436893203883	0	0
2011/09/28	SW	2	d1		0	0	0	0	0	0	0	0	0	2.77777777777778	0	7.40740740740741	0	0.925925925925926	0	0	0	0	0	0	0	0	0	0	0	0	0	0	0	0	0	0	0	0	4.62962962962963	0	0	0	0	39.8148148148148	0.925925925925926	0	1.85185185185185	0	0.925925925925926
2011/09/28	SW	2	d2		0	0	0	23.5849056603774	0	0	0	0	0	2.83018867924528	0	0	0	0	0	0	0	0	0	0	0	0	0	0	0	0	0	0	0	0	0	0	0	0	2.83018867924528	0	0	0	0	33.0188679245283	0	0	3.77358490566038	0	0.943396226415094
2011/09/28	SW	2	d3		0	0	0	14.7058823529412	0	0	0	0	0	0.980392156862745	0	9.80392156862745	0	0	0	0	0	0	0	0	0	0	0	0	0	0	0	0	0	0	0	0	0	0	4.90196078431373	0	0	0	0	37.2549019607843	0	0	1.96078431372549	0	0
2011/09/28	SW	2	d4		0	0	0	17.3076923076923	0	0.961538461538462	0	0	0	0.961538461538462	0	0	0	0	0	0	0	0	0	0	0	0	0	0	0	0	0	0	0	0	0	0	0	0	2.88461538461538	0	0	0	0	36.5384615384615	0	0	3.84615384615385	0	4.80769230769231
2011/09/28	SW	3	d1		0	0	0	16.3636363636364	0	0	0	0	0	2.72727272727273	0	0	0	3.63636363636364	0	0	0	0	0	0	0	0	0	0	0	0	0	0	0	0	0	0	0	0	4.54545454545455	0	0	0	0	27.2727272727273	0	0	1.81818181818182	0	0
2011/09/28	SW	3	d2		0	0	0	33.0188679245283	0	0	0	0	0	2.83018867924528	0	0.943396226415094	0	1.88679245283019	0	0	0	0	0	0	0	0	0	0	0	0	0	0	0	0	0	0	0	0	4.71698113207547	0	0	0	0	23.5849056603774	0	0	0	0	0
2011/09/28	SW	3	d3		0	0	0	33.0188679245283	0	0.943396226415094	0	0	0	1.88679245283019	0	2.83018867924528	0	1.88679245283019	0	0	0	0	0	0	0	0	0	0	0	0	0	0	0	0	0	0	0	0	4.71698113207547	0	0	0	0	28.3018867924528	0	0	0	0	0
2011/09/28	SW	3	d4		0	0	0	33.6538461538462	0	0	0	0	0	1.92307692307692	0	0	0	7.69230769230769	0	0	0	0	0	0	0	0	0	0	0	0	0	0	0	0	0	0	0	0	2.88461538461538	0	0	1.92307692307692	0	28.8461538461538	0	0	4.80769230769231	0	0
2011/09/28	SW	4	d1		0	0	0	36.1904761904762	0	0	0	0	0	0.952380952380952	0	0	0	0	0	0	0	0	0	0	0	0	0	0	0	0	0	0	0	0	0	0	12.3809523809524	0	4.76190476190476	0	0	0	0	21.9047619047619	0	0	0.952380952380952	0	0.952380952380952
2011/09/28	SW	4	d2		0	0	0	43.6893203883495	0	0	0	0	0	0.970873786407767	0	0	0	0	0	0	0	0	0	0	0	0	0	0	0	0	0	0	0	0	0	0	2.9126213592233	0	4.85436893203883	0	0	0	0	14.5631067961165	0	12.621359223301	0.970873786407767	0	0
2011/09/28	SW	4	d3		0	0	0	0	0	0.980392156862745	0	0	0	0.980392156862745	0	0	0	0	0	0	0	0	0	0.980392156862745	0	0	0	0	0	0	0	0	0	0	0	0	9.80392156862745	0	4.90196078431373	0	0	0	0	39.2156862745098	0	0	1.96078431372549	0	0.980392156862745
2011/09/28	SW	4	d4		0	0	0	0.934579439252336	0	0.934579439252336	0	0	0	1.86915887850467	0	0	0	0.934579439252336	0	0	0	0	0	3.73831775700935	0	0	0	0	0	0	0	0	0	0	0	0	0	0	4.67289719626168	0	0	0	0	42.0560747663551	0	0	2.80373831775701	0	0
2011/09/28	SE	1	d1		0	0	0	32.1100917431193	0	0	0	0	0	2.75229357798165	0	4.58715596330275	0	0	0	0	0	0.917431192660551	0	0	0	0	0	0	0	0	0	0	0	0	0	0	0	0	2.75229357798165	0	0	0	0	27.5229357798165	0.917431192660551	0	0	0	0
2011/09/28	SE	1	d2		0	0	0	28.0373831775701	2.80373831775701	0	0	0	0	2.80373831775701	0	2.80373831775701	0	0	0	0	0	4.67289719626168	0	0	0	0	0	0	0	0	0	0	0	0	0	0	0	0	2.80373831775701	0	0	0	0	14.018691588785	0.934579439252336	0	0	0	0
2011/09/28	SE	1	d3		0	0	0	27.5229357798165	2.75229357798165	0	0	0	0	1.8348623853211	0	2.75229357798165	0	0	0	0	0	4.58715596330275	0	0	0	0	0	0	0	0	0	0	0	0	0	0	0	0	2.75229357798165	0	0	0	0	16.5137614678899	0	0	0.917431192660551	0	2.75229357798165
2011/09/28	SE	1	d4		0	0	0	28.3018867924528	0	0	0	0	0	1.88679245283019	0	4.71698113207547	0	0	0	0	0	4.71698113207547	0	0	0	0	0	0	0	0	0	0	0	0	0	0	0	0	4.71698113207547	0	0	0	0	16.9811320754717	0.943396226415094	0	7.54716981132075	0	0.943396226415094
2011/09/28	SE	2	d1		0	0	0	53.7037037037037	0	0	0	0	0	2.77777777777778	0	4.62962962962963	0	0	0	0	0	2.77777777777778	0	0	0	0	0	0	0	0	0	0	0	0	0	0	0	0	2.77777777777778	0	0	0	0	13.8888888888889	0.925925925925926	0	0.925925925925926	0	0
2011/09/28	SE	2	d2		0	0	0	48.0769230769231	2.88461538461538	0	0	0	0	0.961538461538462	0	9.61538461538462	0	0	0	0	0	0	0	0	0	0	0	0	0	0	0	0	0	0	0	0	0	0	2.88461538461538	0	0	0	0	17.3076923076923	0	0	0.961538461538462	0	4.80769230769231
2011/09/28	SE	2	d3		0	0	0	35.5140186915888	2.80373831775701	0	0	0	0	1.86915887850467	0	7.47663551401869	0	0	0	0	0	0	0	0	0	0	0	0	0	0	0	0	0	0	0	0	0	0	2.80373831775701	0	0	0	0	21.4953271028037	0.934579439252336	0	1.86915887850467	0	9.34579439252336
2011/09/28	SE	2	d4		0	0	0	36.8932038834951	0.970873786407767	0	0	0	0	0.970873786407767	0	14.5631067961165	0	0	0	0	0	0	0	0	0	0	0	0	0	0	0	0	0	0	0	0	0	0	2.9126213592233	0	0	0	0	17.4757281553398	0	0	1.94174757281553	0	0
2011/09/29	SE	3	d1		0	0	0	16.9811320754717	0	0	0	0	0	1.88679245283019	0	18.8679245283019	0	0	0	0	0	0	0	0	0	0	0	0	0	0	0	0	0	0	0	0	0	0	2.83018867924528	0	0	0	0	16.9811320754717	0.943396226415094	0	0.943396226415094	0	4.71698113207547
2011/09/29	SE	3	d2		0	0	0	17.4757281553398	4.85436893203883	0	0	0	0	0.970873786407767	0	9.70873786407767	0	0	0	0	0	0	0	0	0	0	0	0	0	0	0	0	0	0	0	0	0	0	4.85436893203883	0	0	0	0	7.76699029126214	0	0	0.970873786407767	0	12.621359223301
2011/09/29	SE	3	d3		0	0	0	0	0.952380952380952	0	0	0	0	1.9047619047619	0	26.6666666666667	0	0	0	0	0	2.85714285714286	0	0	0	0	0	0	0	0	0	0	0	0	0	0	0	0	4.76190476190476	0	0	0	0	12.3809523809524	0	0	0.952380952380952	0	0
2011/09/29	SE	3	d4		0	0	0	33.0188679245283	0.943396226415094	0	0	0	0	0.943396226415094	0	18.8679245283019	0	0	0	0	0	1.88679245283019	0	0	0	0	0	0	0	0	0	0	0	0	0	0	0	0	2.83018867924528	0	0	0	0	7.54716981132075	2.83018867924528	0	2.83018867924528	0	0
2011/09/29	SE	4	d1		0	0	0	22.7272727272727	0	0.909090909090909	3.63636363636364	0	0	1.81818181818182	0	7.27272727272727	0	0	0	0	0	3.63636363636364	0	0	0	0	0	0	0	0	0	0	0	0	0	0	0	0	2.72727272727273	0	0	0	0	20.9090909090909	0	0	0.909090909090909	0	0.909090909090909
2011/09/29	SE	4	d2		0	0	0	40.1869158878505	2.80373831775701	0	0	0	0	1.86915887850467	0	4.67289719626168	0	0	0	0	0	0.934579439252336	0	0	0	0	0	0	0	0	0	0	0	0	0	0	0	0	4.67289719626168	0	0	0	0	16.8224299065421	0.934579439252336	0	0.934579439252336	0	2.80373831775701
2011/09/29	SE	4	d3		0	0	0	33.9805825242718	0	0.970873786407767	0	0	0	1.94174757281553	0	12.621359223301	0	0	0	0	0	2.9126213592233	0	0	0	0	0	0	0	0	0	0	0	0	0	0	0	0	4.85436893203883	0	0	0	0	17.4757281553398	0.970873786407767	0	2.9126213592233	0	0
2011/09/29	SE	4	d4		0	0	0	34.3137254901961	0	0.980392156862745	0	0	0	0.980392156862745	0	24.5098039215686	0	0	0	0	0	0	0	0	0	0	0	0	0	0	0	0	0	0	0	0	0	0	2.94117647058824	0	0	0	0	19.6078431372549	0.980392156862745	0	0.980392156862745	0	0.980392156862745
2011/10/06	NN1-7	1	d1		0	0	0	24.5098039215686	0	0	0	0	0	1.96078431372549	0	0	0	0	0	0	0	0	0	0	0	0	0	0	0	0	0	0	0	0	0	0	0	0	4.90196078431373	0	0	0	0	19.6078431372549	0	0	0	0	0
2011/10/06	NN1-7	1	d2		0	0	0	23.3644859813084	0	0	0	0	0	0	0	0	0	0	0	0	0	0	0	0	0	0	0	0	0	0	0	0	0	0	0	0	0	0	4.67289719626168	0	0	0	0	18.6915887850467	0	0	0	0	1.86915887850467
2011/10/06	NN1-7	1	d3		0	0	0	34.6534653465347	0	0	0	0	0	0.99009900990099	0	0	0	0	0	0	0	0	0	0	0	0	0	0	0	0	0	0	0	0	0	0	0	0	4.95049504950495	0	0	0	0	24.7524752475248	0	0	0	0	0
2011/10/06	NN1-7	1	d4		0	0	0	0	0	0	0	0	0	0.99009900990099	0	0	0	0	0	0	0	0	0	0	0	0	0	0	0	0	0	0	0	0	0	0	0	0	4.95049504950495	0	0	0	0	34.6534653465347	0	0	0	0	4.95049504950495
2011/10/06	NN1-7	2	d1		0	0	0	0	0	0	0	0	0	0.970873786407767	0	0	0	0	0	0	0	0	0	0	0	0	0	0	0	0	0	0	0	0	0	0	0	0	4.85436893203883	0	0	0	0	38.8349514563107	0	0	1.94174757281553	0	0
2011/10/06	NN1-7	2	d2		0	0	0	33.3333333333333	0	0	0	0	0	0.952380952380952	0	0	0	0	0	0	0	0	0	0	0	0	0	0	0	0	0	0	0	0	0	0	0	0	4.76190476190476	0	0	0	0	28.5714285714286	1.9047619047619	0	1.9047619047619	0	0
2011/10/06	NN1-7	2	d3		0	0	0	19.4174757281553	0	0	0	0	0	2.9126213592233	0	0	0	0	0	0	0	0	0	0	0	0	0	0	0	0	0	0	0	0	0	0	0	0	4.85436893203883	0	0	0	0	43.6893203883495	0	0	0	0	0
2011/10/06	NN1-7	2	d4		0	0	0	0	0	0	0	0	0	1.88679245283019	0	0	0	0	0	0	0	0	0	0	0	0	0	0	0	0	0	0	0	0	0	0	0	0	4.71698113207547	0	0	0	0	51.8867924528302	0	0	1.88679245283019	0	4.71698113207547
2011/10/06	NN1-7	3	d1		0	0	0	44.5544554455446	0	0	0	0	0	0.99009900990099	0	0	0	0	0	0	0	0	0	0	0	0	0	0	0	0	0	0	0	0	0	0	0	0	4.95049504950495	0	0	0	0	9.9009900990099	0	0	0	0	4.95049504950495
2011/10/06	NN1-7	3	d2		0	0	0	28.3018867924528	0	0	0	0	0	1.88679245283019	0	0	0	0	0	0	0	1.88679245283019	0	0	0	0	0	0	0	0	0	0	0	0	0	0	0	0	4.71698113207547	0	0	0	0	9.43396226415094	0	0	0	0	1.88679245283019
2011/10/06	NN1-7	3	d3		0	0	0	15.4639175257732	0	0	0	0	0	2.06185567010309	0	0	0	0	0	0	0	5.15463917525773	0	0	0	0	0	0	0	0	0	0	0	0	0	0	0	0	5.15463917525773	0	0	0	0	20.6185567010309	0	0	0	0	5.15463917525773
2011/10/06	NN1-7	3	d4		0	0	0	24.0384615384615	0	0	0	0	0	0	0	0	0	0	0	0	0	1.92307692307692	0	0	0	0	0	0	0	0	0	0	0	0	0	0	0	0	4.80769230769231	0	0	0	0	38.4615384615385	0	0	1.92307692307692	0	4.80769230769231
2011/10/06	NN1-7	4	d1		0	0	0	68.6274509803922	0	0	0	0	0	1.96078431372549	0	0	0	0	0	0	0	0	0	0	0	0	0	0	0	0	0	0	0	0	0	0	0	0	4.90196078431373	0	0	0	0	4.90196078431373	0	0	0	0	0
2011/10/06	NN1-7	4	d2		0	0	0	29.4117647058824	0	0	0	0	0	0.980392156862745	0	0	0	0	0	0	0	1.96078431372549	0	0	0	0	0	0	0	0	0	0	0	0	0	0	0	0	4.90196078431373	0	0	0	0	9.80392156862745	0	0	0	0	1.96078431372549
2011/10/06	NN1-7	4	d3		0	0	0	33.3333333333333	0	0	0	0	0	0.952380952380952	0	0	0	0	0	0	0	1.9047619047619	0	0	0	0	0	0	0	0	0	0	0	0	0	0	0	0	4.76190476190476	0	0	0	0	14.2857142857143	0	0	0	0	1.9047619047619
2011/10/06	NN1-7	4	d4		0	0	0	13.3928571428571	0	0	0	0	0	0.892857142857143	0	0	0	0	0	0	0	1.78571428571429	0	0	0	0	0	0	0	0	0	0	0	0	0	0	0	0	4.46428571428571	0	0	0	0	44.6428571428571	0	0	1.78571428571429	0	4.46428571428571
2011/10/06	NN1-7	5	d1		0	0	0	48.0769230769231	0	0	0	0	0	0	0	0	0	0	0	0	0	0	0	0	0	0	0	0	0	0	0	0	0	0	0	0	0	0	4.80769230769231	0	0	0	0	9.61538461538462	0	0	0	0	1.92307692307692
2011/10/06	NN1-7	5	d2		0	0	0	14.2857142857143	0	0	0	0	0	0.952380952380952	0	0	0	0	0	0	0	1.9047619047619	0	0	0	0	0	0	0	0	0	0	0	0	0	0	0	0	4.76190476190476	0	0	0	0	4.76190476190476	0	0	0	0	1.9047619047619
2011/10/06	NN1-7	5	d3		0	0	0	14.8514851485149	0	0	0	0	0	0.99009900990099	0	0	0	0	0	0	0	4.95049504950495	0	0	0	0	0	0	0	0	0	0	0	0	0	0	0	0	4.95049504950495	0	0	0	0	19.8019801980198	0	0	0	0	0
2011/10/06	NN1-7	5	d4		0	0	0	29.7029702970297	0	0	0	0	0	0.99009900990099	0	0	0	0	0	0	0	0	0	0	0	0	0	0	0	0	0	0	0	0	0	0	0	0	4.95049504950495	0	0	0	0	9.9009900990099	0	0	4.95049504950495	0	0
2011/10/06	NN1-7	6	d1		0	0	0	48.5436893203884	0	0	0	0	0	0.970873786407767	0	0	0	0	0	0	0	1.94174757281553	0	0	0	0	0	0	0	0	0	0	0	0	0	0	0	0	4.85436893203883	0	0	0	0	14.5631067961165	0	0	4.85436893203883	0	0
2011/10/06	NN1-7	6	d2		0	0	0	28.0373831775701	0	0	0	0	0	0.934579439252336	0	0	0	0	0	0	0	0	0	0	0	0	0	0	0	0	0	0	0	0	0	0	0	0	4.67289719626168	0	0	0	0	14.018691588785	0	0	0	0	1.86915887850467
2011/10/06	NN1-7	6	d3		0	0	0	24.2718446601942	0	0	0	0	0	1.94174757281553	0	0	0	0	0	0	0	1.94174757281553	0	0	0	0	0	0	0	0	0	0	0	0	0	0	0	0	4.85436893203883	0	0	0	0	0	0	0	1.94174757281553	0	0
2011/10/06	NN1-7	6	d4		0	0	0	34.6534653465347	0	0	0	0	0	0.99009900990099	0	0	0	0	0	0	0	0	0	0	0	0	0	0	0	0	0	0	0	0	0	0	0	0	4.95049504950495	0	0	0	0	9.9009900990099	0	0	9.9009900990099	0	0
2011/10/06	NN1-7	7	d1		0	0	0	19.8019801980198	0	0	0	0	0	0.99009900990099	0	0	14.8514851485149	0	0	0	0	0	0	0	0	0	0	0	0	0	0	0	0	0	0	0	0	0	4.95049504950495	0	0	0	0	9.9009900990099	0	0	4.95049504950495	0	0
2011/10/06	NN1-7	7	d2		0	0	0	14.7058823529412	0	0	0	0	0	0.980392156862745	0	29.4117647058824	0	0	0	0	0	0	0	0	0	0	0	0	0	0	0	0	0	0	0	0	0	0	4.90196078431373	0	0	0	0	1.96078431372549	0	0	1.96078431372549	0	0
2011/10/06	NN1-7	7	d3		0	0	0	9.9009900990099	0	0	0	0	0	0.99009900990099	0	14.8514851485149	0	0	0	0	0	0	0	0	0	0	0	0	0	0	0	0	0	0	0	0	0	0	4.95049504950495	0	0	0	0	9.9009900990099	0	0	9.9009900990099	0	4.95049504950495
2011/10/06	NN1-7	7	d4		0	0	0	24.5098039215686	0	0	0	0	0	0	0	0	0	0	0	0	0	0	0	0	0	0	0	0	0	0	0	0	0	0	0	0	0	0	4.90196078431373	0	0	0	0	4.90196078431373	0	0	14.7058823529412	0	0
2011/10/06	NN8-14	8	d1		0	0	0	36.036036036036	0	0	0	0	0	0.900900900900901	0	0	4.5045045045045	0	0	0	0	0	0	0	0	0	0	0	0	0	0	0	0	0	0	0	0	0	4.5045045045045	0	0	0	0	18.018018018018	0	4.5045045045045	4.5045045045045	0	4.5045045045045
2011/10/06	NN8-14	8	d2		0	0	0	24.2718446601942	0	0	0	0	0	0.970873786407767	0	0	4.85436893203883	0	0	0	0	0	0	0	0	0	0	0	0	0	0	0	0	0	0	0	0	0	4.85436893203883	0	0	0	0	19.4174757281553	0	4.85436893203883	4.85436893203883	0	1.94174757281553
2011/10/06	NN8-14	8	d3		0	0	0	4.95049504950495	0	0	0	0	0	0.99009900990099	0	0	0	0	0	0	0	0	0	0	0	0	0	0	0	0	0	0	0	0	0	0	0	0	4.95049504950495	0	0	0	0	4.95049504950495	0	0	14.8514851485149	0	9.9009900990099
2011/10/06	NN8-14	8	d4		0	0	0	29.7029702970297	0	0	0	0	0	0.99009900990099	0	0	0	0	0	0	0	4.95049504950495	0	0	0	0	0	0	0	0	0	0	0	0	0	0	0	0	4.95049504950495	0	0	0	0	4.95049504950495	0	0	19.8019801980198	0	4.95049504950495
2011/10/06	NN8-14	9	d1		0	0	0	29.4117647058824	0	0	0	0	0	1.96078431372549	0	0	0	0	0	0	0	0	0	0	0	0	0	0	0	0	0	0	0	0	0	0	0	0	4.90196078431373	0	0	0	0	34.3137254901961	0	0	4.90196078431373	0	4.90196078431373
2011/10/06	NN8-14	9	d2		0	0	0	14.2857142857143	0	0	0	0	0	0.952380952380952	0	0	0	0	0	0	0	0	0	0	0	0	0	0	0	0	0	0	0	0	0	0	0	0	4.76190476190476	0	0	0	0	28.5714285714286	0	0	1.9047619047619	0	1.9047619047619
2011/10/06	NN8-14	9	d3		0	0	0	9.70873786407767	0	0	0	0	0	0.970873786407767	0	0	0	0	0	0	0	1.94174757281553	0	0	0	0	0	0	0	0	0	0	0	0	0	0	0	0	4.85436893203883	0	0	0	0	33.9805825242718	0	0	9.70873786407767	0	0
2011/10/06	NN8-14	9	d4		0	0	0	20	0	0	0	0	0	0	0	0	0	0	0	0	0	5	0	0	0	0	0	0	0	0	0	0	0	0	0	0	0	0	5	0	0	0	0	20	0	0	10	0	0
2011/10/06	NN8-14	10	d1		0	0	0	14.7058823529412	0	0	0	0	0	1.96078431372549	0	0	0	0	0	0	0	0	0	0	0	0	0	0	0	0	0	0	0	0	0	0	0	0	4.90196078431373	0	0	0	0	44.1176470588235	0	0	4.90196078431373	0	0
2011/10/06	NN8-14	10	d2		0	0	0	23.8095238095238	0	0	0	0	0	2.85714285714286	0	0	0	0	0	0	0	1.9047619047619	0	0	0	0	0	0	0	0	0	0	0	0	0	0	0	0	4.76190476190476	0	0	0	0	38.0952380952381	0	0	9.52380952380952	0	0
2011/10/06	NN8-14	10	d3		0	0	0	19.2307692307692	0	0	0	0	0	1.92307692307692	0	0	0	0	0	0	0	1.92307692307692	0	0	0	0	0	0	0	0	0	0	0	0	0	0	0	0	4.80769230769231	0	0	0	0	28.8461538461538	0	0	4.80769230769231	0	0
2011/10/06	NN8-14	10	d4		0	0	0	20	0	0	0	0	0	0	0	0	0	0	0	0	0	5	0	0	0	0	0	0	0	0	0	0	0	0	0	0	0	0	5	0	0	0	0	5	0	0	10	0	0
2011/10/06	NN8-14	11	d1		0	0	0	9.9009900990099	0	0	0	0	0	0.99009900990099	0	0	0	0	0	0	0	0	0	0	0	0	0	0	0	0	0	0	0	0	0	0	0	0	4.95049504950495	0	0	0	0	34.6534653465347	0	0	9.9009900990099	0	0
2011/10/06	NN8-14	11	d2		0	0	0	10.752688172043	0	0	0	0	0	3.2258064516129	0	0	0	0	0	0	0	0	0	0	0	0	0	0	0	0	0	0	0	0	0	0	0	0	5.37634408602151	0	0	0	0	43.010752688172	0	0	5.37634408602151	0	0
2011/10/06	NN8-14	11	d3		0	0	0	24.2718446601942	0	0	0	0	0	2.9126213592233	0	0	0	0	0	0	0	0	0	0	0	0	0	0	0	0	0	0	0	0	0	0	0	0	4.85436893203883	0	0	0	0	29.126213592233	0	0	4.85436893203883	0	0
2011/10/06	NN8-14	11	d4		0	0	0	9.34579439252336	0	0	0	0	0	1.86915887850467	0	0	0	0	0	0	0	0	0	0	0	0	0	0	0	0	0	0	0	0	0	0	0	0	4.67289719626168	0	0	0	0	28.0373831775701	0	0	9.34579439252336	0	0
2011/10/06	NN8-14	12	d1		0	0	0	14.5631067961165	0	0	0	0	0	2.9126213592233	0	0	0	0	0	0	0	0	0	0	0	0	0	0	0	0	0	0	0	0	0	0	0	0	4.85436893203883	0	0	0	0	33.9805825242718	0	4.85436893203883	9.70873786407767	0	0
2011/10/06	NN8-14	12	d2		0	0	0	0	0	0	0	0	0	2.9126213592233	0	0	0	0	0	0	0	0	0	0	0	0	0	0	0	0	0	0	0	0	0	0	0	0	4.85436893203883	0	0	0	0	38.8349514563107	0	0	14.5631067961165	0	0
2011/10/06	NN8-14	12	d3		0	0	0	19.6078431372549	0	0	0	0	0	1.96078431372549	0	0	0	0	0	0	0	0	0	0	0	0	0	0	0	0	0	0	0	0	0	0	0	0	4.90196078431373	0	0	0	0	34.3137254901961	0	0	9.80392156862745	0	0
2011/10/06	NN8-14	12	d4		0	0	0	9.70873786407767	0	0	0	0	0	2.9126213592233	0	0	0	0	0	0	0	0	0	0	0	0	0	0	0	0	0	0	0	0	0	0	0	0	4.85436893203883	0	0	0	0	29.126213592233	0	0	14.5631067961165	0	0
2011/10/06	NN8-14	13	d1		0	0	0	28.0373831775701	0	0	0	0	0	0	0	0	0	0	0	0	0	1.86915887850467	0	0	0	0	0	0	0	0	0	0	0	0	4.67289719626168	0	0	0	4.67289719626168	0	0	0	0	14.018691588785	0	0	28.0373831775701	0	0
2011/10/06	NN8-14	13	d2		0	0	0	15.3061224489796	0	0	0	0	0	3.06122448979592	0	0	0	0	0	0	0	0	0	0	0	0	0	0	0	0	0	0	0	0	5.10204081632653	0	0	0	5.10204081632653	0	0	0	0	15.3061224489796	0	0	30.6122448979592	0	5.10204081632653
2011/10/06	NN8-14	13	d3		0	0	0	0	0	0	0	0	0	3.06122448979592	0	0	0	0	0	0	0	15.3061224489796	0	0	0	0	0	0	0	0	0	0	0	0	0	0	0	0	5.10204081632653	0	0	0	0	25.5102040816327	0	0	30.6122448979592	0	10.2040816326531
2011/10/06	NN8-14	13	d4		0	0	0	5.26315789473684	0	0	0	0	0	0	0	0	0	0	0	0	0	21.0526315789474	0	0	0	0	0	0	0	0	0	0	0	0	0	0	0	0	5.26315789473684	0	0	0	0	5.26315789473684	5.26315789473684	0	31.5789473684211	0	10.5263157894737
2011/10/06	NN8-14	14	d1		0	0	0	15.1515151515152	0	0	0	0	0	2.02020202020202	0	0	0	0	0	0	0	10.1010101010101	0	0	0	0	0	0	0	0	0	0	0	0	5.05050505050505	0	0	0	5.05050505050505	0	0	0	0	2.02020202020202	0	0	20.2020202020202	0	0
2011/10/06	NN8-14	14	d2		0	0	0	14.8514851485149	0	0	0	0	0	0.99009900990099	0	0	0	0	0	0	0	9.9009900990099	0	0	0	0	0	0	0	0	0	0	0	0	9.9009900990099	0	0	0	4.95049504950495	0	0	0	0	4.95049504950495	0	0	34.6534653465347	0	9.9009900990099
2011/10/06	NN8-14	14	d3		0	0	0	10.2040816326531	0	0	0	0	0	3.06122448979592	0	0	0	0	0	0	0	5.10204081632653	0	0	0	0	0	5.10204081632653	0	0	0	0	0	0	0	0	0	0	10.2040816326531	0	0	0	0	5.10204081632653	0	0	51.0204081632653	0	0
2011/10/06	NN8-14	14	d4		0	0	0	0	0	0	0	0	0	0.99009900990099	0	0	0	0	0	0	0	19.8019801980198	0	0	0	0	0	0	0	0	0	0	0	0	0	0	0	0	4.95049504950495	0	0	0	0	9.9009900990099	0	0	29.7029702970297	0	4.95049504950495
2011/10/08	SW	1	d1		0	0	0	24.0384615384615	0	0	0	0	0	1.92307692307692	0	0	0	0	0	0	0	0	0	0	0	0	0	0	0	0	0	0	0	0	0	0	0	0	9.61538461538462	0	0	0	0	28.8461538461538	0	0	4.80769230769231	0	1.92307692307692
2011/10/08	SW	1	d2		0	0	0	19.6078431372549	0	0	0	0	0	0	0	14.7058823529412	0	0	0	0	0	0	0	0	0	0	0	0	0	0	0	0	0	0	0	0	0	0	9.80392156862745	0	0	0	0	34.3137254901961	0	0	1.96078431372549	0	0
2011/10/08	SW	1	d3		0	0	0	4.80769230769231	0	0	0	0	0	1.92307692307692	0	0	0	1.92307692307692	0	0	0	0	0	0	0	0	0	0	0	0	0	0	0	0	0	0	0	0	9.61538461538462	0	0	0	0	43.2692307692308	0	0	4.80769230769231	0	0
2011/10/08	SW	1	d4		0	0	0	20	0	0	0	0	0	0	0	0	0	0	0	0	0	0	0	0	0	0	0	0	0	0	0	0	0	0	0	0	0	0	10	0	0	0	0	40	0	0	5	0	0
2011/10/08	SW	2	d1		0	0	0	0	0	0	0	0	0	2.80373831775701	0	9.34579439252336	0	1.86915887850467	0	0	0	0	0	0	0	0	0	0	0	0	0	0	0	0	0	0	0	0	9.34579439252336	0	0	0	0	37.3831775700935	0	0	1.86915887850467	0	0
2011/10/08	SW	2	d2		0	0	0	19.2307692307692	0	0	0	0	0	1.92307692307692	0	0	0	0	0	0	0	0	0	0	0	0	0	0	0	0	0	0	0	0	0	0	0	0	4.80769230769231	0	0	0	0	28.8461538461538	0	0	1.92307692307692	0	0
2011/10/08	SW	2	d3		0	0	0	9.70873786407767	0	0	0	0	0	0.970873786407767	0	9.70873786407767	0	0	0	0	0	0	0	0	0	0	0	0	0	0	0	0	0	0	0	0	0	0	9.70873786407767	0	0	0	0	33.9805825242718	0	0	1.94174757281553	0	0
2011/10/08	SW	2	d4		0	0	0	14.5631067961165	0	0	0	0	0	0.970873786407767	0	0	0	0	0	0	0	0	0	0	0	0	0	0	0	0	0	0	0	0	0	0	0	0	4.85436893203883	0	0	0	0	29.126213592233	0	0	1.94174757281553	0	4.85436893203883
2011/10/08	SW	3	d1		0	0	0	14.018691588785	0	0	0	0	0	2.80373831775701	0	0	0	1.86915887850467	0	0	0	0	0	0	0	0	0	0	0	0	0	0	0	0	0	0	0	0	9.34579439252336	0	0	0	0	18.6915887850467	0	0	1.86915887850467	0	0
2011/10/08	SW	3	d2		0	0	0	28.8461538461538	0	0	0	0	0	1.92307692307692	0	0	0	1.92307692307692	0	0	0	0	0	0	0	0	0	0	0	0	0	0	0	0	0	0	0	0	9.61538461538462	0	0	0	0	19.2307692307692	0	0	0	0	0
2011/10/08	SW	3	d3		0	0	0	38.8349514563107	0	0	0	0	0	0.970873786407767	0	0	0	1.94174757281553	0	0	0	0	0	0	0	0	0	0	0	0	0	0	0	0	0	0	0	0	9.70873786407767	0	0	0	0	19.4174757281553	0	0	0	0	0
2011/10/08	SW	3	d4		0	0	0	29.7029702970297	0	0	0	0	0	0.99009900990099	0	0	0	4.95049504950495	0	0	0	0	0	0	0	0	0	0	0	0	0	0	0	0	0	0	0	0	4.95049504950495	0	0	0	0	24.7524752475248	0	0	4.95049504950495	0	0
2011/10/08	SW	4	d1		0	0	0	33.3333333333333	0	0	0	0	0	0.952380952380952	0	0	0	0	0	0	0	0	0	0	0	0	0	0	0	0	0	0	0	0	0	0	9.52380952380952	0	9.52380952380952	0	0	0	0	14.2857142857143	0	0	1.9047619047619	0	1.9047619047619
2011/10/08	SW	4	d2		0	0	0	29.126213592233	0	0	0	0	0	0.970873786407767	0	0	0	0	0	0	0	0	0	0	0	0	0	0	0	0	0	0	0	0	0	0	0	0	9.70873786407767	0	0	0	0	29.126213592233	0	0	1.94174757281553	0	0
2011/10/08	SW	4	d3		0	0	0	0	0	0	0	0	0	0.952380952380952	0	0	0	0	0	0	0	0	0	0	0	0	0	0	0	0	0	0	0	0	0	0	9.52380952380952	0	9.52380952380952	0	0	0	0	28.5714285714286	0	0	1.9047619047619	0	1.9047619047619
2011/10/08	SW	4	d4		0	0	0	0	0	0	0	0	0	1.8348623853211	0	0	0	1.8348623853211	0	0	0	0	0	4.58715596330275	0	0	0	0	0	0	0	0	0	0	0	0	0	0	9.1743119266055	0	0	0	0	27.5229357798165	0	0	4.58715596330275	0	0
2011/10/08	SE	1	d1		0	0	0	26.7857142857143	0	0	0	0	0	1.78571428571429	0	4.46428571428571	0	0	0	0	0	0	0	0	0	0	0	0	0	0	0	0	0	0	0	0	0	0	4.46428571428571	0	0	0	0	26.7857142857143	0	0	0	0	0
2011/10/08	SE	1	d2		0	0	0	29.126213592233	0	0	0	0	0	2.9126213592233	0	4.85436893203883	0	0	0	0	0	0	0	0	0	0	0	0	0	0	0	0	0	0	0	0	0	0	4.85436893203883	0	0	0	0	9.70873786407767	0	0	0	0	0
2011/10/08	SE	1	d3		0	0	0	23.8095238095238	0	0	0	0	0	0.952380952380952	0	4.76190476190476	0	0	0	0	0	4.76190476190476	0	0	0	0	0	0	0	0	0	0	0	0	0	0	0	0	4.76190476190476	0	0	0	0	4.76190476190476	0	0	0	0	0
2011/10/08	SE	1	d4		0	0	0	24.7524752475248	0	0	0	0	0	0.99009900990099	0	4.95049504950495	0	0	0	0	0	4.95049504950495	0	0	0	0	0	0	0	0	0	0	0	0	0	0	0	0	9.9009900990099	0	0	0	0	4.95049504950495	0	0	9.9009900990099	0	0
2011/10/08	SE	2	d1		0	0	0	57.6923076923077	0	0	0	0	0	1.92307692307692	0	4.80769230769231	0	0	0	0	0	0	0	0	0	0	0	0	0	0	0	0	0	0	0	0	0	0	4.80769230769231	0	0	0	0	9.61538461538462	0	0	1.92307692307692	0	0
2011/10/08	SE	2	d2		0	0	0	59.4059405940594	0	0	0	0	0	0.99009900990099	0	14.8514851485149	0	0	0	0	0	0	0	0	0	0	0	0	0	0	0	0	0	0	0	0	0	0	4.95049504950495	0	0	0	0	4.95049504950495	0	0	0	0	0
2011/10/08	SE	2	d3		0	0	0	38.4615384615385	0	0	0	0	0	1.92307692307692	0	9.61538461538462	0	0	0	0	0	0	0	0	0	0	0	0	0	0	0	0	0	0	0	0	0	0	4.80769230769231	0	0	0	0	14.4230769230769	0	0	1.92307692307692	0	9.61538461538462
2011/10/08	SE	2	d4		0	0	0	29.126213592233	0	0	0	0	0	0.970873786407767	0	19.4174757281553	0	0	0	0	0	0	0	0	0	0	0	0	0	0	0	0	0	0	0	0	0	0	4.85436893203883	0	0	0	0	4.85436893203883	0	0	1.94174757281553	0	0
2011/10/10	SE	3	d1		0	0	0	4.90196078431373	0	0	0	0	0	0.980392156862745	0	19.6078431372549	0	0	0	0	0	0	0	0	0	0	0	0	0	0	0	0	0	0	0	0	0	0	4.90196078431373	0	0	0	0	4.90196078431373	0	0	0.980392156862745	0	4.90196078431373
2011/10/10	SE	3	d2		0	0	0	14.5631067961165	0	0	0	0	0	0.970873786407767	0	14.5631067961165	0	0	0	0	0	0	0	0	0	0	0	0	0	0	0	0	0	0	0	0	0	0	9.70873786407767	0	0	0	0	4.85436893203883	0	0	1.94174757281553	0	9.70873786407767
2011/10/10	SE	3	d3		0	0	0	0	0	0	0	0	0	1.02040816326531	0	25.5102040816327	0	0	0	0	0	0	0	0	0	0	0	0	0	0	0	0	0	0	0	0	0	0	10.2040816326531	0	0	0	0	5.10204081632653	0	0	2.04081632653061	0	0
2011/10/10	SE	3	d4		0	0	0	29.126213592233	0	0	0	0	0	0.970873786407767	0	19.4174757281553	0	0	0	0	0	1.94174757281553	0	0	0	0	0	0	0	0	0	0	0	0	0	0	0	0	4.85436893203883	0	0	0	0	4.85436893203883	0	0	4.85436893203883	0	0
2011/10/10	SE	4	d1		0	0	0	19.2307692307692	0	0	4.80769230769231	0	0	0.961538461538462	0	9.61538461538462	0	0	0	0	0	1.92307692307692	0	0	0	0	0	0	0	0	0	0	0	0	0	0	0	0	4.80769230769231	0	0	0	0	4.80769230769231	0	0	0.961538461538462	0	0
2011/10/10	SE	4	d2		0	0	0	38.8349514563107	0	0	0	0	0	0.970873786407767	0	4.85436893203883	0	0	0	0	0	0	0	0	0	0	0	0	0	0	0	0	0	0	0	0	0	0	9.70873786407767	0	0	0	0	4.85436893203883	0	0	1.94174757281553	0	4.85436893203883
2011/10/10	SE	4	d3		0	0	0	36.4583333333333	0	0	0	0	0	1.04166666666667	0	15.625	0	0	0	0	0	0	0	0	0	0	0	0	0	0	0	0	0	0	0	0	0	0	10.4166666666667	0	0	0	0	5.20833333333333	0	0	5.20833333333333	0	0
2011/10/10	SE	4	d4		0	0	0	30	0	0	0	0	0	1	0	20	0	0	0	0	0	0	0	0	0	0	0	0	0	0	0	0	0	0	0	0	0	0	5	0	0	0	0	20	0	0	2	0	2
2011/11/03	NN1-7	1	d1		0	0	0	0	0	0	0	0	0	1.88679245283019	0	0	0	0	0	0	0	0	0	0	0	0	0	0	0	0	0	0	0	0	0	0	0	0	9.43396226415094	0	0	0	0	18.8679245283019	4.71698113207547	0	1.88679245283019	0	0
2011/11/03	NN1-7	1	d2		0	0	0	0	0	0	0	0	0	0.952380952380952	0	0	0	0	0	0	0	1.9047619047619	0	0	0	0	0	0	0	0	0	0	0	0	0	0	0	0	9.52380952380952	0	0	0	0	14.2857142857143	4.76190476190476	0	1.9047619047619	0	9.52380952380952
2011/11/03	NN1-7	1	d3		0	0	0	0	0	0	0	0	0	0.892857142857143	0	0	0	0	0	0	0	0	0	0	0	0	0	0	0	0	0	0	0	0	0	0	0	0	8.92857142857143	0	0	0	0	22.3214285714286	1.78571428571429	0	0	0	1.78571428571429
2011/11/03	NN1-7	1	d4		0	0	0	0	0	0	0	0	0	0.970873786407767	0	0	0	0	0	0	0	0	0	0	0	0	0	0	0	0	0	0	0	0	0	0	0	0	9.70873786407767	0	0	0	0	29.126213592233	0	0	1.94174757281553	0	9.70873786407767
2011/11/03	NN1-7	2	d1		0	0	0	0	0	0	0	0	0	0.99009900990099	0	0	0	0	0	0	0	0	0	0	0	0	0	0	0	0	0	0	0	0	0	0	0	0	9.9009900990099	0	0	0	0	9.9009900990099	4.95049504950495	0	4.95049504950495	0	4.95049504950495
2011/11/03	NN1-7	2	d2		0	0	0	0	0	0	0	0	0	1.92307692307692	0	0	0	0	0	0	0	0	0	0	0	0	0	0	0	0	0	0	0	0	0	0	0	0	9.61538461538462	0	0	0	0	9.61538461538462	4.80769230769231	0	9.61538461538462	0	4.80769230769231
2011/11/03	NN1-7	2	d3		0	0	0	0	0	0	0	0	0	1.96078431372549	0	0	0	0	0	0	0	0	0	0	0	0	0	0	0	0	0	0	0	0	0	0	0	0	9.80392156862745	0	0	0	0	19.6078431372549	4.90196078431373	0	0	0	0
2011/11/03	NN1-7	2	d4		0	0	0	0	0	0	0	0	0	1.92307692307692	0	0	0	0	0	0	0	0	0	0	0	0	0	0	0	0	0	0	0	0	0	0	0	0	9.61538461538462	0	0	0	0	24.0384615384615	0	0	1.92307692307692	0	4.80769230769231
2011/11/03	NN1-7	3	d1		0	0	0	0	0	0	0	0	0	1.96078431372549	0	0	0	0	0	0	0	4.90196078431373	0	0	0	0	0	0	0	0	0	0	0	0	0	0	0	0	9.80392156862745	0	0	0	0	9.80392156862745	4.90196078431373	0	0	0	9.80392156862745
2011/11/03	NN1-7	3	d2		0	0	0	0	0	0	0	0	0	4.54545454545455	0	0	0	0	0	0	0	9.09090909090909	0	0	0	0	0	0	0	0	0	0	0	0	0	0	0	0	9.09090909090909	0	0	0	0	9.09090909090909	9.09090909090909	0	0	0	4.54545454545455
2011/11/03	NN1-7	3	d3		0	0	0	4.46428571428571	0	0	0	0	0	1.78571428571429	0	0	0	0	0	0	0	8.92857142857143	0	0	0	0	0	0	0	0	0	0	0	0	0	0	0	0	8.92857142857143	0	0	0	0	8.92857142857143	4.46428571428571	0	0	0	4.46428571428571
2011/11/03	NN1-7	3	d4		0	0	0	0	0	0	0	0	0	0.99009900990099	0	0	0	0	0	0	0	4.95049504950495	0	0	0	0	0	0	0	0	0	0	0	0	0	0	0	0	9.9009900990099	0	0	0	0	24.7524752475248	0	0	4.95049504950495	0	4.95049504950495
2011/11/03	NN1-7	4	d1		0	0	0	28.0373831775701	0	0	0	0	0	1.86915887850467	0	0	0	0	4.67289719626168	0	0	0	0	0	0	0	0	0	0	0	0	0	0	0	0	0	0	0	9.34579439252336	0	0	0	0	9.34579439252336	4.67289719626168	0	0	0	4.67289719626168
2011/11/03	NN1-7	4	d2		0	0	0	19.4174757281553	0	0	0	0	0	0.970873786407767	0	0	0	0	4.85436893203883	0	0	4.85436893203883	0	0	0	0	0	0	0	0	0	0	0	0	0	0	0	0	9.70873786407767	0	0	0	0	9.70873786407767	1.94174757281553	0	0	0	0
2011/11/03	NN1-7	4	d3		0	0	0	19.2307692307692	0	0	0	0	0	1.92307692307692	0	0	0	0	4.80769230769231	0	0	4.80769230769231	0	0	0	0	0	0	0	0	0	0	0	0	0	0	0	0	9.61538461538462	0	0	0	0	14.4230769230769	4.80769230769231	0	0	0	0
2011/11/03	NN1-7	4	d4		0	0	0	8.47457627118644	0	0	0	0	0	1.69491525423729	0	0	0	0	0	0	0	1.69491525423729	0	0	0	0	0	0	0	0	0	0	0	0	0	0	0	0	8.47457627118644	0	0	0	0	16.9491525423729	0	0	1.69491525423729	0	1.69491525423729
2011/11/03	NN1-7	5	d1		0	0	0	42.8571428571429	0	0	0	0	0	0.952380952380952	0	0	0	0	0	0	0	1.9047619047619	0	0	0	0	0	0	0	0	0	0	0	0	0	0	0	0	9.52380952380952	0	0	0	0	23.8095238095238	0	0	0	0	4.76190476190476
2011/11/03	NN1-7	5	d2		0	0	0	12.6050420168067	0	0	0	0	0	0	0	0	0	0	0	0	0	4.20168067226891	1.68067226890756	0	0	0	0	0	0	0	0	0	0	0	0	0	0	0	8.40336134453782	0	0	0	0	8.40336134453782	4.20168067226891	0	0	0	0
2011/11/03	NN1-7	5	d3		0	0	0	14.8514851485149	0	0	0	0	0	0.99009900990099	0	0	0	0	0	0	0	9.9009900990099	0	0	0	0	0	0	0	0	0	0	0	0	0	0	0	0	9.9009900990099	0	0	0	0	9.9009900990099	4.95049504950495	0	0	0	0
2011/11/03	NN1-7	5	d4		0	0	0	31.5789473684211	0	0	0	0	0	1.05263157894737	0	0	0	0	0	0	0	5.26315789473684	0	0	0	0	0	0	0	0	0	0	0	0	0	0	0	0	10.5263157894737	0	0	0	0	10.5263157894737	0	0	10.5263157894737	0	0
2011/11/03	NN1-7	6	d1		0	0	0	35	0	0	0	0	0	5	0	0	0	0	0	0	0	5	0	0	0	0	0	0	0	0	0	0	0	0	0	0	0	0	10	0	0	0	0	5	5	0	0	0	0
2011/11/03	NN1-7	6	d2		0	0	0	19.4174757281553	0	0	0	0	0	4.85436893203883	0	0	0	0	0	0	0	0	0	0	0	0	0	0	0	0	0	0	0	0	0	0	0	0	4.85436893203883	0	0	0	0	4.85436893203883	9.70873786407767	0	0.970873786407767	0	1.94174757281553
2011/11/03	NN1-7	6	d3		0	0	0	19.4174757281553	0	0	0	0	0	0.970873786407767	0	0	0	0	0	0	0	0	0	0	0	0	0	0	0	0	0	0	0	0	0	0	0	0	4.85436893203883	0	0	0	0	4.85436893203883	9.70873786407767	0	1.94174757281553	0	0
2011/11/03	NN1-7	6	d4		0	0	0	29.126213592233	0	0	0	0	0	0.970873786407767	0	0	0	0	0	0	0	1.94174757281553	0	0	0	0	0	0	0	0	0	0	0	0	0	0	0	0	9.70873786407767	0	0	0	0	4.85436893203883	9.70873786407767	0	9.70873786407767	0	0
2011/11/03	NN1-7	7	d1		0	0	0	23.8095238095238	0	0	0	0	0	0.952380952380952	0	0	23.8095238095238	0	0	0	0	0	0	0	0	0	0	0	0	0	0	0	0	0	0	0	0	0	4.76190476190476	0	0	0	0	4.76190476190476	4.76190476190476	0	1.9047619047619	0	0
2011/11/03	NN1-7	7	d2		0	0	0	4.85436893203883	0	0	0	0	0	0.970873786407767	0	0	38.8349514563107	0	0	0	0	0	0	0	0	0	0	0	0	0	0	0	0	0	0	0	0	0	4.85436893203883	0	0	0	0	0	4.85436893203883	0	1.94174757281553	0	0
2011/11/03	NN1-7	7	d3		0	0	0	9.52380952380952	0	0	0	0	0	0.952380952380952	0	0	33.3333333333333	0	0	0	0	0	0	0	0	0	0	0	0	0	0	0	0	0	0	0	0	0	4.76190476190476	0	0	0	0	1.9047619047619	4.76190476190476	0	4.76190476190476	0	1.9047619047619
2011/11/03	NN1-7	7	d4		0	0	0	14.1509433962264	0	0	0	0	0	1.88679245283019	0	0	0	0	0	0	0	1.88679245283019	0	0	0	0	0	0	0	0	0	0	0	0	0	0	0	0	9.43396226415094	0	0	0	0	4.71698113207547	4.71698113207547	0	18.8679245283019	0	0
2011/11/03	NN8-14	8	d1		0	0	0	29.7029702970297	0	0	0	0	0	0.99009900990099	0	0	0	0	0	0	0	0	0	0	0	0	0	0	0	0	0	0	0	0	0	0	0	0	9.9009900990099	0	0	0	0	4.95049504950495	4.95049504950495	0	4.95049504950495	0	9.9009900990099
2011/11/03	NN8-14	8	d2		0	0	0	29.126213592233	0	0	0	0	0	0.970873786407767	0	0	14.5631067961165	0	0	0	0	0	0	0	0	0	0	0	0	0	0	0	0	0	0	0	0	0	9.70873786407767	0	0	0	0	9.70873786407767	4.85436893203883	1.94174757281553	9.70873786407767	0	0
2011/11/03	NN8-14	8	d3		0	0	0	4.95049504950495	0	0	0	0	0	0.99009900990099	0	0	0	0	0	0	0	4.95049504950495	0	0	0	0	0	0	0	0	0	0	0	0	0	0	0	0	4.95049504950495	0	0	0	0	4.95049504950495	0	0	9.9009900990099	0	19.8019801980198
2011/11/03	NN8-14	8	d4		0	0	0	9.00900900900901	0	0	0	0	0	0.900900900900901	0	0	0	0	0	0	0	18.018018018018	0	0	0	0	0	0	0	0	0	0	0	0	0	0	0	0	9.00900900900901	0	0	0	0	9.00900900900901	4.5045045045045	0	13.5135135135135	0	0
2011/11/03	NN8-14	9	d1		0	0	0	24.0384615384615	0	0	0	0	0	1.92307692307692	0	0	0	0	0	0	0	4.80769230769231	0	0	0	0	0	0	0	0	0	0	0	0	0	0	0	0	4.80769230769231	0	0	0	0	28.8461538461538	1.92307692307692	0	4.80769230769231	0	0
2011/11/03	NN8-14	9	d2		0	0	0	9.9009900990099	0	0	0	0	0	0.99009900990099	0	0	0	0	0	0	0	4.95049504950495	0	0	0	0	0	0	0	0	0	0	0	0	0	0	0	0	9.9009900990099	0	0	0	0	29.7029702970297	0	0	9.9009900990099	0	0
2011/11/03	NN8-14	9	d3		0	0	0	4.85436893203883	0	0	0	0	0	0.970873786407767	0	0	0	0	0	0	0	4.85436893203883	0	0	0	0	0	0	0	0	0	0	0	0	0	0	0	0	4.85436893203883	0	0	0	0	29.126213592233	4.85436893203883	0	4.85436893203883	0	0
2011/11/03	NN8-14	9	d4		0	0	0	9.80392156862745	0	0	0	0	0	1.96078431372549	0	0	0	0	0	0	0	9.80392156862745	0	0	0	0	0	0	0	0	0	0	0	0	0	0	0	0	9.80392156862745	0	0	0	0	19.6078431372549	9.80392156862745	0	9.80392156862745	0	0
2011/11/03	NN8-14	10	d1		0	0	0	9.9009900990099	0	0	0	0	0	0.99009900990099	0	0	0	0	0	0	0	0	0	0	0	0	0	0	0	0	0	0	0	0	0	0	0	0	4.95049504950495	0	0	0	0	39.6039603960396	0	0	4.95049504950495	0	0
2011/11/03	NN8-14	10	d2		0	0	0	14.2857142857143	0	0	0	0	0	0.952380952380952	0	0	0	0	0	0	0	1.9047619047619	0	0	0	0	0	0	0	0	0	0	0	0	0	0	0	0	4.76190476190476	0	0	0	0	33.3333333333333	0	0	14.2857142857143	0	1.9047619047619
2011/11/03	NN8-14	10	d3		0	0	0	14.1509433962264	0	0	0	0	0	0.943396226415094	0	0	0	0	0	0	0	4.71698113207547	0	0	0	0	0	0	0	0	0	0	0	0	0	0	0	0	9.43396226415094	0	0	0	0	33.0188679245283	0	0	14.1509433962264	0	0
2011/11/03	NN8-14	10	d4		0	0	0	14.8514851485149	0	0	0	0	0	0.99009900990099	0	0	0	0	0	0	0	9.9009900990099	0	0	0	0	0	0	0	0	0	0	0	0	0	0	0	0	4.95049504950495	0	0	0	0	14.8514851485149	4.95049504950495	0	4.95049504950495	0	0
2011/11/03	NN8-14	11	d1		0	0	0	4.95049504950495	0	0	0	0	0	0.99009900990099	0	0	0	0	0	0	0	0	0	0	0	0	0	0	0	0	0	0	0	0	0	0	0	0	4.95049504950495	0	0	0	0	39.6039603960396	0	0	9.9009900990099	0	0
2011/11/03	NN8-14	11	d2		0	0	0	1.94174757281553	0	0	0	0	0	0.970873786407767	0	0	0	0	0	0	0	0	0	0	0	0	0	0	0	0	0	0	0	0	0	0	0	0	4.85436893203883	0	0	0	0	33.9805825242718	0	0	4.85436893203883	0	0
2011/11/03	NN8-14	11	d3		0	0	0	13.2743362831858	0	0	0	0	0	0.884955752212389	0	0	0	0	0	0	0	0	0	0	0	1.76991150442478	0	0	0	0	0	0	0	0	0	0	0	0	4.42477876106195	0	0	0	0	26.5486725663717	0	0	8.84955752212389	0	0
2011/11/03	NN8-14	11	d4		0	0	0	9.70873786407767	0	0	0	0	0	0.970873786407767	0	0	0	0	0	0	0	1.94174757281553	0	0	0	0	0	0	0	0	0	0	0	0	0	0	0	0	9.70873786407767	0	0	0	0	19.4174757281553	9.70873786407767	0	4.85436893203883	0	0
2011/11/03	NN8-14	12	d1		0	0	0	4.90196078431373	0	0	0	0	0	1.96078431372549	0	0	0	0	0	0	0	4.90196078431373	0	0	0	0	0	0	0	0	0	0	0	0	0	0	0	0	4.90196078431373	0	0	0	0	39.2156862745098	0	0	24.5098039215686	0	0
2011/11/03	NN8-14	12	d2		0	0	0	0	0	0	0	0	0	0.970873786407767	0	0	0	0	0	0	0	4.85436893203883	0	0	0	0	0	0	0	0	0	0	0	0	0	0	0	0	4.85436893203883	0	0	0	0	43.6893203883495	0	0	9.70873786407767	0	0
2011/11/03	NN8-14	12	d3		0	0	0	18.6915887850467	0	0	0	0	0	1.86915887850467	0	0	0	0	0	0	0	9.34579439252336	0	0	0	0	0	0	0	0	0	0	0	0	0	0	0	0	4.67289719626168	0	0	0	0	28.0373831775701	0	0	14.018691588785	0	0
2011/11/03	NN8-14	12	d4		0	0	0	5	0	0	0	0	0	5	0	0	0	0	0	0	0	10	0	0	0	0	0	0	0	0	0	0	0	0	0	0	0	0	5	0	0	0	0	30	0	0	10	0	0
2011/11/03	NN8-14	13	d1		0	0	0	19.6078431372549	0	0	0	0	0	1.96078431372549	0	0	0	0	0	0	0	4.90196078431373	0	0	0	0	0	0	0	0	0	0	0	0	0	0	0	0	9.80392156862745	0	0	0	0	9.80392156862745	4.90196078431373	0	39.2156862745098	0	0
2011/11/03	NN8-14	13	d2		0	0	0	5	0	0	0	0	0	5	0	0	0	0	0	0	0	5	0	0	0	0	0	0	0	0	0	0	0	0	0	0	0	0	10	0	0	0	0	15	5	0	45	0	0
2011/11/03	NN8-14	13	d3		0	0	0	0	0	0	0	0	0	4.76190476190476	0	0	0	0	0	0	0	9.52380952380952	0	0	0	0	0	0	0	0	0	0	0	0	0	0	0	0	23.8095238095238	0	0	0	0	14.2857142857143	4.76190476190476	0	23.8095238095238	0	9.52380952380952
2011/11/03	NN8-14	13	d4		0	0	0	0	0	0	0	0	0	4.54545454545455	0	0	0	0	0	0	0	22.7272727272727	0	0	0	0	0	0	0	0	0	0	0	0	0	0	0	0	18.1818181818182	0	0	0	0	4.54545454545455	0	0	22.7272727272727	0	9.09090909090909
2011/11/03	NN8-14	14	d1		0	0	0	9.52380952380952	0	0	0	0	0	9.52380952380952	0	0	0	0	0	0	0	4.76190476190476	0	0	0	0	0	0	0	0	0	0	0	0	0	0	0	0	23.8095238095238	0	0	0	0	4.76190476190476	0	0	33.3333333333333	0	0
2011/11/03	NN8-14	14	d2		0	0	0	5	0	0	0	0	0	10	0	0	0	0	0	0	0	0	0	0	0	0	0	0	0	0	0	0	0	0	0	0	0	0	20	0	0	0	0	0	0	0	40	0	5
2011/11/03	NN8-14	14	d3		0	0	0	4.54545454545455	0	0	0	0	0	9.09090909090909	0	0	0	0	0	0	0	4.54545454545455	0	0	0	0	0	0	0	0	0	0	0	0	0	0	0	0	22.7272727272727	0	0	0	0	0	0	0	45.4545454545455	0	0
2011/11/03	NN8-14	14	d4		0	0	0	0	0	0	0	0	0	9.09090909090909	0	0	0	0	0	0	0	13.6363636363636	0	0	0	0	0	0	0	0	0	0	0	0	0	0	0	0	13.6363636363636	0	0	0	0	4.54545454545455	0	0	36.3636363636364	0	0
2011/11/04	SW	1	d1		0	0	0	5	0	0	0	0	0	0	0	0	0	0	0	0	0	0	0	0	0	0	0	0	0	0	0	0	0	0	0	0	0	0	10	0	0	0	0	20	0	0	10	0	0
2011/11/04	SW	1	d2		0	0	0	9.9009900990099	0	0	0	0	0	0.99009900990099	0	9.9009900990099	0	0	0	0	0	0	0	0	0	0	0	0	0	0	0	0	0	0	0	0	0	0	9.9009900990099	0	0	0	0	24.7524752475248	0	0	9.9009900990099	0	0
2011/11/04	SW	1	d3		0	0	0	0	0	0	0	0	0	0.99009900990099	0	0	0	0	0	0	0	0	0	0	0	0	0	0	0	0	0	0	0	0	0	0	0	0	9.9009900990099	0	0	0	0	29.7029702970297	0	0	4.95049504950495	0	0
2011/11/04	SW	1	d4		0	0	0	9.09090909090909	0	0	0	0	0	0	0	0	0	0	0	0	0	0	0	0	0	0	0	0	0	0	0	0	0	0	0	0	0	0	9.09090909090909	0	0	0	0	27.2727272727273	4.54545454545455	0	4.54545454545455	0	0
2011/11/04	SW	2	d1		0	0	0	0	0	0	0	0	0	0	0	9.80392156862745	0	1.96078431372549	0	0	0	0	0	0	0	0	0	0	0	0	0	0	0	0	0	0	0	0	9.80392156862745	0	0	0	0	34.3137254901961	0	0	4.90196078431373	0	0
2011/11/04	SW	2	d2		0	0	0	5	0	0	0	0	0	0	0	0	0	0	0	0	0	0	0	0	0	0	0	0	0	0	0	0	0	0	0	0	0	0	10	0	0	0	0	35	0	0	5	0	0
2011/11/04	SW	2	d3		0	0	0	0	0	0	0	0	0	0	0	20	0	0	0	0	0	0	0	0	0	0	0	0	0	0	0	0	0	0	0	0	0	0	10	0	0	0	0	25	5	0	5	0	0
2011/11/04	SW	2	d4		0	0	0	5.10204081632653	0	0	0	0	0	1.02040816326531	0	0	0	0	0	5.10204081632653	0	0	0	0	0	0	0	0	0	0	0	0	0	0	0	0	0	0	10.2040816326531	0	0	0	0	30.6122448979592	0	0	5.10204081632653	0	5.10204081632653
2011/11/04	SW	3	d1		0	0	0	0	0	0	0	0	0	0.952380952380952	0	9.52380952380952	0	1.9047619047619	0	1.9047619047619	0	0	0	0	0	0	0	0	0	0	0	0	0	0	0	0	0	0	9.52380952380952	0	0	0	0	14.2857142857143	4.76190476190476	0	4.76190476190476	0	0
2011/11/04	SW	3	d2		0	0	0	10.989010989011	0	0	0	0	0	1.0989010989011	0	16.4835164835165	0	0	0	0	0	0	0	0	0	0	0	0	0	0	0	0	0	0	0	0	0	0	5.49450549450549	0	0	0	0	16.4835164835165	0	0	0	0	0
2011/11/04	SW	3	d3		0	0	0	9.70873786407767	0	0	0	0	0	0.970873786407767	0	0	0	1.94174757281553	0	0	0	0	0	0	0	0	0	0	0	0	0	0	0	0	0	0	0	0	4.85436893203883	0	0	0	0	19.4174757281553	0	0	0	0	0
2011/11/04	SW	3	d4		0	0	0	14.7058823529412	0	0	0	0	0	0	0	0	0	4.90196078431373	0	4.90196078431373	0	1.96078431372549	0	0	0	0	0	0	0	0	0	0	0	0	0	0	0	0	9.80392156862745	0	0	0	0	34.3137254901961	0	0	9.80392156862745	0	0
2011/11/04	SW	4	d1		0	0	0	18.018018018018	0	0	0	0	0	0.900900900900901	0	0	0	0	0	0	0	0	0	0	0	0	0	0	0	0	0	0	0	0	0	0	18.018018018018	0	9.00900900900901	0	0	0	0	13.5135135135135	4.5045045045045	0	0	0	4.5045045045045
2011/11/04	SW	4	d2		0	0	0	14.2857142857143	0	0	0	0	0	0.952380952380952	0	0	0	0	0	0	0	0	0	0	0	0	0	0	0	0	0	0	0	0	0	0	9.52380952380952	0	9.52380952380952	0	0	0	0	19.047619047619	1.9047619047619	0	0	0	0
2011/11/04	SW	4	d3		0	0	0	0	0	0	0	0	0	0	0	0	0	0	0	0	0	0	0	0	0	0	0	0	0	0	0	0	0	0	0	0	0	0	9.61538461538462	0	0	0	0	28.8461538461538	0	0	4.80769230769231	0	0
2011/11/04	SW	4	d4		0	0	0	0	0	0	0	0	0	1.94174757281553	0	0	0	1.94174757281553	0	0	0	1.94174757281553	0	0	0	0	0	0	0	0	0	0	0	0	0	0	0	0	9.70873786407767	0	0	0	0	29.126213592233	1.94174757281553	0	9.70873786407767	0	0
2011/11/04	SE	1	d1		0	0	0	19.2307692307692	0	0	0	0	0	1.92307692307692	0	4.80769230769231	0	0	0	1.92307692307692	0	4.80769230769231	0	0	0	0	0	0	0	0	0	0	0	0	0	0	0	0	9.61538461538462	0	0	0	0	4.80769230769231	9.61538461538462	0	0	0	0
2011/11/04	SE	1	d2		0	0	0	20	0	0	0	0	0	0	0	5	0	0	0	0	0	5	0	0	0	0	0	0	0	0	0	0	0	0	0	0	0	0	5	0	0	0	0	5	10	0	0	0	0
2011/11/04	SE	1	d3		0	0	0	14.5631067961165	0	0	0	0	0	0.970873786407767	0	0	0	0	0	4.85436893203883	0	9.70873786407767	0	0	0	0	0	0	0	0	0	0	0	0	0	0	0	0	4.85436893203883	0	0	0	0	4.85436893203883	9.70873786407767	0	0	0	0
2011/11/04	SE	1	d4		0	0	0	15	0	0	0	0	0	0	0	5	0	0	0	5	0	5	0	0	0	0	0	0	0	0	0	0	0	0	0	0	0	0	5	0	0	0	0	0	20	0	10	0	5
2011/11/04	SE	2	d1		0	0	0	25.2525252525253	0	0	0	0	0	2.02020202020202	0	10.1010101010101	0	0	0	0	0	2.02020202020202	0	0	0	0	0	0	0	0	0	0	0	0	0	0	0	0	10.1010101010101	0	0	0	0	5.05050505050505	5.05050505050505	0	0	0	0
2011/11/04	SE	2	d2		0	0	0	29.7029702970297	0	0	0	0	0	0.99009900990099	0	19.8019801980198	0	0	0	0	0	0	0	0	0	0	0	0	0	0	0	0	0	0	0	0	0	0	9.9009900990099	0	0	0	0	4.95049504950495	0	0	0	0	9.9009900990099
2011/11/04	SE	2	d3		0	0	0	14.4230769230769	0	0	0	0	0	1.92307692307692	0	19.2307692307692	0	0	0	0	0	0	0	0	0	0	0	0	0	0	0	0	0	0	0	0	0	0	9.61538461538462	0	0	0	0	4.80769230769231	9.61538461538462	0	1.92307692307692	0	0
2011/11/04	SE	2	d4		0	0	0	40	0	0	0	0	0	0	0	20	0	0	0	0	0	0	0	0	0	0	0	0	0	0	0	0	0	0	0	0	0	0	5	0	0	0	0	0	10	0	0	0	0
2011/11/04	SE	3	d1		0	0	0	4.80769230769231	0	0	0	0	0	0	0	28.8461538461538	0	0	0	0	0	0	0	0	0	1.92307692307692	0	0	0	0	0	0	0	0	0	0	0	0	4.80769230769231	0	0	0	0	4.80769230769231	0	0	1.92307692307692	0	9.61538461538462
2011/11/04	SE	3	d2		0	0	0	4.90196078431373	0	0	0	0	0	0	0	29.4117647058824	0	0	0	0	0	4.90196078431373	0	0	0	0	0	0	0	0	0	0	0	0	0	0	0	0	9.80392156862745	0	0	0	0	0	1.96078431372549	0	0	0	4.90196078431373
2011/11/04	SE	3	d3		0	0	0	0	0	0	0	0	0	0.952380952380952	0	28.5714285714286	0	0	0	0	0	4.76190476190476	0	0	0	0	0	0	0	0	0	0	0	0	0	0	0	0	4.76190476190476	0	0	0	0	1.9047619047619	0	0	1.9047619047619	0	0
2011/11/04	SE	3	d4		0	0	0	4.80769230769231	0	0	0	0	0	0	0	28.8461538461538	0	0	0	0	0	4.80769230769231	0	0	0	0	0	0	0	0	0	0	0	0	0	0	0	0	4.80769230769231	0	0	0	0	1.92307692307692	4.80769230769231	0	1.92307692307692	0	0
2011/11/04	SE	4	d1		0	0	0	10.1010101010101	0	0	0	0	0	0	0	5.05050505050505	0	0	0	0	0	5.05050505050505	0	0	0	0	0	0	0	0	0	0	0	0	0	0	0	0	5.05050505050505	0	0	0	0	5.05050505050505	10.1010101010101	0	2.02020202020202	0	0
2011/11/04	SE	4	d2		0	0	0	20	0	0	0	0	0	1	0	15	0	0	0	0	0	5	0	0	0	0	0	0	0	0	0	0	0	0	0	0	0	0	5	0	0	0	0	0	10	0	2	0	0
2011/11/04	SE	4	d3		0	0	0	5.15463917525773	0	0	0	0	0	0	0	20.6185567010309	0	0	0	0	0	5.15463917525773	0	0	0	0	0	0	0	0	0	0	0	0	0	0	0	0	5.15463917525773	0	0	0	0	5.15463917525773	10.3092783505155	0	2.06185567010309	0	0
2011/11/04	SE	4	d4		0	0	0	24.7524752475248	0	0	0	0	0	0	0	29.7029702970297	0	0	0	0	0	0	0	0	0	0	0	0	0	0	0	0	0	0	0	0	0	0	4.95049504950495	0	0	0	0	4.95049504950495	4.95049504950495	0	0.99009900990099	0	0
2011/12/18	NN1-7	1	d1		0	2.7027027027027	1.8018018018018	0	0	0	0	0	0	1.8018018018018	0	0	0	0	0	0	0	0	0	0	0	0	0	0	0	0	0	0	0	0	0	0	0	0	9.00900900900901	0	0	0	0	18.018018018018	4.5045045045045	0	1.8018018018018	0	0
2011/12/18	NN1-7	1	d2		0	4.27350427350427	0	0	0	0	0	0	0	0.854700854700855	0	0	0	0	0	0	0	4.27350427350427	0	0	0	0	0	3.41880341880342	0	0	0	0	0	0	0	0	0	0	8.54700854700855	0	0	0	0	12.8205128205128	4.27350427350427	0	1.70940170940171	0	8.54700854700855
2011/12/18	NN1-7	1	d3		0	0	1.75438596491228	0	0	0	0	0	0	0.87719298245614	0	0	0	0	0	0	0	0	0	0	0	0	0	0	0	0	0	0	0	0	0	0	0	0	8.7719298245614	0	0	0	0	21.9298245614035	1.75438596491228	0	0	0	1.75438596491228
2011/12/18	NN1-7	1	d4		0	2.83018867924528	0	0	0	0	0	0	0	0.943396226415094	0	0	0	0	0	0	0	0	0	0	0	0	0	0	0	0	0	0	0	0	0	0	0	0	9.43396226415094	0	0	0	0	28.3018867924528	0	0	1.88679245283019	0	9.43396226415094
2011/12/18	NN1-7	2	d1		0	2.83018867924528	0	0	0	0	0	0	0	0.943396226415094	0	0	0	0	0	0	0	1.88679245283019	0	0	0	0	0	0	0	0	0	0	0	0	0	0	0	0	9.43396226415094	0	0	0	0	9.43396226415094	4.71698113207547	0	4.71698113207547	0	4.71698113207547
2011/12/18	NN1-7	2	d2		0	3.7037037037037	0	0	0	0	0	0	0	1.85185185185185	0	0	0	0	0	0	0	0	0	0	0	0	0	0	0	0	0	0	0	0	0	0	0	0	9.25925925925926	0	0	0	0	9.25925925925926	4.62962962962963	0	9.25925925925926	0	4.62962962962963
2011/12/18	NN1-7	2	d3		0	0	1.92307692307692	0	0	0	0	0	0	1.92307692307692	0	0	0	0	0	0	0	0	0	0	0	0	0	0	0	0	0	0	0	0	0	0	0	0	9.61538461538462	0	0	0	0	19.2307692307692	4.80769230769231	0	0	0	0
2011/12/18	NN1-7	2	d4		0	1.88679245283019	0	0	0	0	0	0	0	1.88679245283019	0	0	0	0	0	0	0	0	0	0	0	0	0	0	0	0	0	0	0	0	0	0	0	0	9.43396226415094	0	0	0	0	23.5849056603774	0	0	1.88679245283019	0	4.71698113207547
2011/12/18	NN1-7	3	d1		0	0.909090909090909	1.81818181818182	0	0	0	0	0	0	1.81818181818182	0	0	0	0	0	0	0	9.09090909090909	0	0	0	0	0	0	0	0	0	0	0	0	0	0	0	0	9.09090909090909	0	0	0	0	9.09090909090909	4.54545454545455	0	0	0	9.09090909090909
2011/12/18	NN1-7	3	d2		0	3.2258064516129	0	0	0	0	0	0	0	4.03225806451613	0	0	0	0	0	0	0	16.1290322580645	0	0	0	0	0	0	0	0	0	0	0	0	0	0	0	0	8.06451612903226	0	0	0	0	8.06451612903226	8.06451612903226	0	0	0	4.03225806451613
2011/12/18	NN1-7	3	d3		0	0.806451612903226	0.806451612903226	4.03225806451613	0	0	0	0	0	1.61290322580645	0	0	0	0	0	0	0	16.1290322580645	0	0	0	0	0	0	0	0	0	0	0	0	0	0	0	0	8.06451612903226	0	0	0	0	8.06451612903226	4.03225806451613	0	0	0	4.03225806451613
2011/12/18	NN1-7	3	d4		0	1.88679245283019	0	0	0	0	0	0	0	0.943396226415094	0	0	0	0	0	0	0	7.54716981132075	0	0	0	0	0	0	0	0	0	0	0	0	0	0	0	0	9.43396226415094	0	0	0	0	23.5849056603774	0	0	4.71698113207547	0	4.71698113207547
2011/12/18	NN1-7	4	d1		0	0.869565217391304	0.869565217391304	26.0869565217391	0	0	0	0	0	1.73913043478261	0	0	0	0	4.34782608695652	0	0	5.21739130434783	0	0	0	0	0	0	0	0	0	0	0	0	0	0	0	0	8.69565217391304	0	0	0	0	8.69565217391304	4.34782608695652	0	0	0	4.34782608695652
2011/12/18	NN1-7	4	d2		0	0.99009900990099	0	14.8514851485149	0	0	0	0	0	0.99009900990099	0	0	0	0	4.95049504950495	0	0	6.93069306930693	0	0	0	0	0	0	0	0	0	0	0	0	0	0	0	0	9.9009900990099	0	0	0	0	9.9009900990099	1.98019801980198	0	0	0	0
2011/12/18	NN1-7	4	d3		0	0	4.04040404040404	10.1010101010101	0	0	0	0	0	2.02020202020202	0	0	0	0	5.05050505050505	0	0	6.06060606060606	0	0	0	0	0	0	0	0	0	0	0	0	0	0	0	0	10.1010101010101	0	0	0	0	15.1515151515152	5.05050505050505	0	0	0	0
2011/12/18	NN1-7	4	d4		0	2.58620689655172	0	4.31034482758621	0	0	0	0	0	1.72413793103448	0	0	0	0	0	0	0	1.72413793103448	0	0	0	0	0	0	0	0	0	0	0	0	0	0	0	0	8.62068965517241	0	0	0	0	17.2413793103448	0	0	1.72413793103448	0	1.72413793103448
2011/12/18	NN1-7	5	d1		0	1.11111111111111	1.11111111111111	27.7777777777778	0	0	0	0	0	1.11111111111111	0	0	0	0	0	0	0	5.55555555555556	0	0	0	0	0	0	0	0	0	0	0	0	0	0	0	0	11.1111111111111	0	0	0	0	27.7777777777778	0	0	0	0	5.55555555555556
2011/12/18	NN1-7	5	d2		0	2.56410256410256	0	4.27350427350427	0	0	0	0	0	0	0	0	0	0	0	0	0	8.54700854700855	1.70940170940171	0	0	0	0	0	0	0	0	0	0	0	0	0	0	0	8.54700854700855	0	0	0	0	8.54700854700855	4.27350427350427	0	0	0	0
2011/12/18	NN1-7	5	d3		0	0	2.1505376344086	5.37634408602151	0	0	0	0	0	1.0752688172043	0	0	0	0	0	0	0	10.752688172043	0	0	0	0	0	0	0	0	0	0	0	0	0	0	0	0	10.752688172043	0	0	0	0	10.752688172043	5.37634408602151	0	0	0	0
2011/12/18	NN1-7	5	d4		0	2.29885057471264	0	22.9885057471264	0	0	0	0	0	1.14942528735632	0	0	0	0	0	0	0	5.74712643678161	0	0	0	0	0	0	0	0	0	0	0	0	0	0	0	0	11.4942528735632	0	0	0	0	11.4942528735632	0	0	11.4942528735632	0	0
2011/12/18	NN1-7	6	d1		0	0.892857142857143	0.892857142857143	31.25	0	0	0	0	0	4.46428571428571	0	0	0	0	0	0	0	8.92857142857143	0	0	0	0	0	4.46428571428571	0	0	0	0	0	0	0	0	0	0	8.92857142857143	0	0	0	0	4.46428571428571	4.46428571428571	0	0	0	0
2011/12/18	NN1-7	6	d2		0	3.125	0	10.4166666666667	0	0	0	0	0	5.20833333333333	0	0	0	0	0	0	0	0	0	0	0	0	0	0	0	0	0	0	0	0	0	0	0	0	5.20833333333333	0	0	0	0	5.20833333333333	10.4166666666667	0	1.04166666666667	0	2.08333333333333
2011/12/18	NN1-7	6	d3		0	1.04166666666667	0	5.20833333333333	0	0	0	0	0	1.04166666666667	0	0	0	0	0	0	0	7.29166666666667	0	0	0	0	0	0	0	0	0	0	0	0	0	0	0	0	5.20833333333333	0	0	0	0	5.20833333333333	10.4166666666667	0	2.08333333333333	0	0
2011/12/18	NN1-7	6	d4		0	1.17647058823529	0	11.7647058823529	0	0	0	0	0	1.17647058823529	0	0	0	0	0	0	0	3.52941176470588	0	0	0	0	0	0	0	0	0	0	0	0	0	0	0	0	11.7647058823529	0	0	0	0	5.88235294117647	11.7647058823529	0	11.7647058823529	0	0
2011/12/18	NN1-7	7	d1		0	1.08695652173913	1.08695652173913	10.8695652173913	0	0	0	0	0	1.08695652173913	0	0	27.1739130434783	0	0	0	0	0	0	0	0	0	0	0	0	0	0	0	0	0	0	0	0	0	5.43478260869565	0	0	0	0	5.43478260869565	5.43478260869565	0	2.17391304347826	0	0
2011/12/18	NN1-7	7	d2		0	1.81818181818182	0	4.54545454545455	0	0	0	0	0	0.909090909090909	0	0	40.9090909090909	0	0	0	0	0	0	0	0	0	0	0	0	0	0	0	0	0	0	0	0	0	4.54545454545455	0	0	0	0	0	4.54545454545455	0	1.81818181818182	0	0
2011/12/18	NN1-7	7	d3		0	1	2	2	0	0	0	0	0	1	0	0	35	0	0	0	0	0	0	0	0	0	0	0	0	0	0	0	0	0	0	0	0	0	5	0	0	0	0	2	5	0	5	0	2
2011/12/18	NN1-7	7	d4		0	1.85185185185185	0	11.1111111111111	0	0	0	0	0	1.85185185185185	0	0	0	0	0	0	0	4.62962962962963	0	0	0	0	0	0	0	0	0	0	0	0	0	0	0	0	9.25925925925926	0	0	0	0	4.62962962962963	4.62962962962963	0	18.5185185185185	0	0
2011/12/18	NN8-14	8	d1		0	2.08333333333333	1.04166666666667	20.8333333333333	0	0	0	0	0	1.04166666666667	0	0	0	0	1.04166666666667	0	0	0	0	0	0	1.04166666666667	0	0	0	0	0	0	0	0	0	0	0	0	10.4166666666667	0	0	0	0	5.20833333333333	5.20833333333333	0	5.20833333333333	0	10.4166666666667
2011/12/18	NN8-14	8	d2		0	2.12765957446809	1.06382978723404	21.2765957446809	0	0	0	0	0	1.06382978723404	0	0	10.6382978723404	0	0	0	0	0	0	0	0	0	0	0	0	0	0	0	0	0	0	0	0	0	10.6382978723404	0	0	0	0	10.6382978723404	5.31914893617021	5.31914893617021	10.6382978723404	0	0
2011/12/18	NN8-14	8	d3		0	0	3.7037037037037	1.85185185185185	0	0	0	0	0	0.925925925925926	0	0	5.55555555555556	0	0	0	0	4.62962962962963	0	0	0	0	0	0	0	0	0	0	0	0	0	0	0	0	4.62962962962963	0	0	0	0	4.62962962962963	0	0	9.25925925925926	0	18.5185185185185
2011/12/18	NN8-14	8	d4		0	2.54237288135593	0	5.08474576271187	0	0	0	0	0	0.847457627118644	0	0	0	0	0	0	0	23.728813559322	0	0	0	0	0	0	0	0	0	0	0	0	0	0	0	0	8.47457627118644	0	0	0	0	8.47457627118644	4.23728813559322	0	12.7118644067797	0	0
2011/12/18	NN8-14	9	d1		0	0	2.12765957446809	8.51063829787234	0	0	0	0	0	2.12765957446809	0	0	0	0	0	0	0	10.6382978723404	0	0	0	0	0	0	0	0	0	0	0	0	0	0	0	0	5.31914893617021	0	0	0	0	31.9148936170213	2.12765957446809	0	5.31914893617021	0	0
2011/12/18	NN8-14	9	d2		0	4	0	5	0	0	0	0	0	1	0	0	0	0	0	0	0	5	0	0	0	0	0	0	0	0	0	0	0	0	0	0	0	0	10	0	0	0	0	30	0	0	10	0	0
2011/12/18	NN8-14	9	d3		0	0.943396226415094	1.88679245283019	3.77358490566038	0	0	0	0	0	0.943396226415094	0	0	0	0	0	0	0	5.66037735849057	0	0	0	0	0	0	0	0	0	0	0	0	0	0	0	0	4.71698113207547	0	0	0	0	28.3018867924528	4.71698113207547	0	4.71698113207547	0	0
2011/12/18	NN8-14	9	d4		0	0.970873786407767	0	4.85436893203883	0	0	0	0	0	1.94174757281553	0	0	0	0	0	0	0	14.5631067961165	0	0	0	0	0	0	0	0	0	0	0	0	0	0	0	0	9.70873786407767	0	0	0	0	19.4174757281553	9.70873786407767	0	9.70873786407767	0	0
2011/12/18	NN8-14	10	d1		0	0	1.03092783505155	5.15463917525773	0	0	0	0	0	1.03092783505155	0	0	0	0	0	0	0	0	0	0	0	0	0	0	0	0	0	0	0	0	0	0	0	0	5.15463917525773	0	0	0	0	41.2371134020619	0	0	5.15463917525773	0	0
2011/12/18	NN8-14	10	d2		0	1.03092783505155	0	6.18556701030928	0	0	0	0	0	1.03092783505155	0	0	0	0	0	0	0	2.06185567010309	0	0	0	0	0	0	0	0	0	0	0	0	0	0	0	0	5.15463917525773	0	0	0	0	36.0824742268041	0	0	15.4639175257732	0	2.06185567010309
2011/12/18	NN8-14	10	d3		0	2.04081632653061	0	5.10204081632653	0	0	0	0	0	1.02040816326531	0	0	0	0	0	0	0	5.10204081632653	0	0	0	0	0	0	0	0	0	0	0	0	0	0	0	0	10.2040816326531	0	0	0	0	35.7142857142857	0	0	15.3061224489796	0	0
2011/12/18	NN8-14	10	d4		0	1.03092783505155	0	5.15463917525773	0	0	0	0	0	1.03092783505155	0	0	0	0	0	0	0	15.4639175257732	0	0	0	0	0	0	0	0	0	0	0	0	0	0	0	0	5.15463917525773	0	0	0	0	15.4639175257732	5.15463917525773	0	5.15463917525773	0	0
2011/12/18	NN8-14	11	d1		0	0	1	3	0	0	0	0	0	1	0	0	0	0	0	0	0	0	0	0	0	0	0	0	0	0	0	0	0	0	0	0	0	0	5	0	0	0	0	40	0	0	10	0	0
2011/12/18	NN8-14	11	d2		0	1.92307692307692	0	0	0	0	0	0	0	0.961538461538462	0	0	0	0	0	0	0	0.961538461538462	0	0	0	0	0	0	0	0	0	0	0	0	0	0	0	0	4.80769230769231	0	0	0	0	33.6538461538462	0	0	4.80769230769231	0	0
2011/12/18	NN8-14	11	d3		0	0.925925925925926	1.85185185185185	6.48148148148148	0	0	0	0	0	0.925925925925926	0	0	0	0	0	0	0	0	0	0	0	1.85185185185185	0	0	0	0	0	0	0	0	0	0	0	0	4.62962962962963	0	0	0	0	27.7777777777778	0	0	9.25925925925926	0	0
2011/12/18	NN8-14	11	d4		0	1.03092783505155	0	3.09278350515464	0	0	0	0	0	1.03092783505155	0	0	0	0	0	0	0	2.06185567010309	0	0	0	0	0	0	0	0	0	0	0	0	0	0	0	0	10.3092783505155	0	0	0	0	20.6185567010309	10.3092783505155	0	5.15463917525773	0	0
2011/12/18	NN8-14	12	d1		0	0	0.970873786407767	2.9126213592233	0	0	0	0	0	1.94174757281553	0	0	0	0	0	0	0	6.79611650485437	0	0	0	0	0	0	0	0	0	0	0	0	0	0	0	0	4.85436893203883	0	0	0	0	38.8349514563107	0	0	24.2718446601942	0	0
2011/12/18	NN8-14	12	d2		0	1.9047619047619	0	0	0	0	0	0	0	0.952380952380952	0	0	0	0	0	0	0	4.76190476190476	0	0	0	0	0	0	0	0	0	0	0	0	0	0	0	0	4.76190476190476	0	0	0	0	42.8571428571429	0	0	9.52380952380952	0	0
2011/12/18	NN8-14	12	d3		0	0	1	7	0	0	0	0	0	2	0	0	0	0	0	0	0	15	0	0	0	0	0	0	0	0	0	0	0	0	0	0	0	0	5	0	0	0	0	30	0	0	15	0	0
2011/12/18	NN8-14	12	d4		0	1.01010101010101	0	3.03030303030303	0	0	0	0	0	5.05050505050505	0	0	0	0	0	0	0	10.1010101010101	0	0	0	0	0	0	0	0	0	0	0	0	0	0	0	0	5.05050505050505	0	0	0	0	30.3030303030303	0	0	10.1010101010101	0	0
2011/12/18	NN8-14	13	d1		0	0	1.11111111111111	7.77777777777778	0	0	0	0	0	2.22222222222222	0	0	0	0	0	0	0	5.55555555555556	0	0	0	0	0	0	0	0	0	0	0	0	0	0	0	0	11.1111111111111	0	0	0	0	11.1111111111111	5.55555555555556	0	44.4444444444444	0	0
2011/12/18	NN8-14	13	d2		0	1.92307692307692	0	6.73076923076923	0	0	0	0	0	4.80769230769231	0	0	0	0	0	0	0	4.80769230769231	0	0	0	0	0	0	0	0	0	0	0	0	0	0	0	0	9.61538461538462	0	0	0	0	14.4230769230769	4.80769230769231	0	43.2692307692308	0	0
2011/12/18	NN8-14	13	d3		0	0.925925925925926	1.85185185185185	0	0	0	0	0	0	4.62962962962963	0	0	0	0	0	0	0	9.25925925925926	0	0	0	0	0	0	0	0	0	0	0	0	0	0	0	0	23.1481481481481	0	0	0	0	13.8888888888889	4.62962962962963	0	23.1481481481481	0	9.25925925925926
2011/12/18	NN8-14	13	d4		0	0.862068965517241	0	0	0	0	0	0	0	4.31034482758621	0	0	0	0	0	0	0	25.8620689655172	0	0	0	0	0	0	0	0	0	0	0	0	0	0	0	0	17.2413793103448	0	0	0	0	4.31034482758621	0	0	21.551724137931	0	8.62068965517241
2011/12/18	NN8-14	14	d1		0	0	0.970873786407767	4.85436893203883	0	0	0	0	0	9.70873786407767	0	0	0	0	0	0	0	6.79611650485437	0	0	0	0	0	0	0	0	0	0	0	0	0	0	0	0	24.2718446601942	0	0	0	0	4.85436893203883	0	0	33.9805825242718	0	0
2011/12/18	NN8-14	14	d2		0	0.900900900900901	0	4.5045045045045	0	0	0	0	0	9.00900900900901	0	0	0	0	0	0	0	1.8018018018018	0	0	0	0	0	7.20720720720721	0	0	0	0	0	0	0	0	0	0	18.018018018018	0	0	0	0	0	0	0	36.036036036036	0	4.5045045045045
2011/12/18	NN8-14	14	d3		0	0.869565217391304	0.869565217391304	2.60869565217391	0	0	0	0	0	8.69565217391304	0	0	0	0	0	0	0	6.08695652173913	0	0	0	0	0	2.60869565217391	0	0	0	0	0	0	0	0	0	0	21.7391304347826	0	0	0	0	0	0	0	43.4782608695652	0	0
2011/12/18	NN8-14	14	d4		0	0.884955752212389	0	0	0	0	0	0	4.42477876106195	8.84955752212389	0	0	0	0	0	0	0	10.6194690265487	0	0	0	0	0	0	0	0	0	0	0	0	0	0	0	0	13.2743362831858	0	0	0	0	4.42477876106195	0	0	35.3982300884956	0	0
2011/12/18	SW	1	d1		0	0.99009900990099	0	4.95049504950495	0	0	0	0	0	0	0	0	0	0	0	0	0	0	0	0	0	0	0	0	0	0	0	0	0	0	0	0	0	0	9.9009900990099	0	0	0	0	19.8019801980198	0	0	9.9009900990099	0	0
2011/12/18	SW	1	d2		0	4	0	5	0	0	0	0	0	1	0	10	0	0	0	0	0	0	0	0	0	0	0	0	0	0	0	0	0	0	0	0	0	0	10	0	0	0	0	25	0	0	10	0	0
2011/12/18	SW	1	d3		0	0.943396226415094	1.88679245283019	0	0	0	0	0	0	0.943396226415094	0	1.88679245283019	0	0	0	0	0	0	0	0	0	0	0	0	0	0	0	0	0	0	0	0	0	0	9.43396226415094	0	0	0	0	28.3018867924528	0	0	4.71698113207547	0	0
2011/12/18	SW	1	d4		0	0.826446280991736	0	8.26446280991736	0	0	0	0	0	0	0	8.26446280991736	0	0	0	0	0	0	0	0	0	0	0	0	0	0	0	0	0	0	0	0	0	0	8.26446280991736	0	0	0	0	24.7933884297521	4.13223140495868	0	4.13223140495868	0	0
2011/12/18	SW	2	d1		0	0	2.85714285714286	0	0	0	0	0	0	0	0	9.52380952380952	0	1.9047619047619	0	0	0	0	0	0	0	0	0	0	0	0	0	0	0	0	0	0	0	0	9.52380952380952	0	0	0	0	33.3333333333333	0	0	4.76190476190476	0	0
2011/12/18	SW	2	d2		0	2.02020202020202	0	2.02020202020202	0	0	0	0	0	0	0	0	0	0	0	0	0	0	0	0	0	0	0	0	0	0	0	0	0	0	0	0	0	0	10.1010101010101	0	0	0	0	35.3535353535354	0	0	5.05050505050505	0	0
2011/12/18	SW	2	d3		0	0.980392156862745	0.980392156862745	0	0	0	0	0	0	0	0	19.6078431372549	0	0	0	0	0	0	0	0	0	0	0	0	0	0	0	0	0	0	0	0	0	0	9.80392156862745	0	0	0	0	24.5098039215686	4.90196078431373	0	4.90196078431373	0	0
2011/12/18	SW	2	d4		0	0.961538461538462	0	4.80769230769231	0	0	0	0	0	0.961538461538462	0	4.80769230769231	0	0	0	4.80769230769231	0	0	0	0	0	0	0	0	0	0	0	0	0	0	0	0	0	0	9.61538461538462	0	0	0	0	28.8461538461538	0	0	4.80769230769231	0	4.80769230769231
2011/12/18	SW	3	d1		0	0	2.77777777777778	0	0	0	0	0	0	0.925925925925926	0	9.25925925925926	0	1.85185185185185	0	1.85185185185185	0	0	0	0	0	0	0	0	0	0	0	0	0	0	0	0	0	0	9.25925925925926	0	0	0	0	13.8888888888889	4.62962962962963	0	4.62962962962963	0	0
2011/12/18	SW	3	d2		0	3.03030303030303	0	10.1010101010101	0	0	0	0	0	1.01010101010101	0	20.2020202020202	0	0	0	0	0	0	0	0	0	0	0	0	0	0	0	0	0	0	0	0	0	0	5.05050505050505	0	0	0	0	15.1515151515152	0	0	0	0	0
2011/12/18	SW	3	d3		0	0	4.62962962962963	9.25925925925926	0	0	0	0	0	0.925925925925926	0	0	0	1.85185185185185	0	0	0	0	0	0	0	0	0	0	0	0	0	0	0	0	0	0	0	0	4.62962962962963	0	0	0	0	18.5185185185185	0	0	0	0	0
2011/12/18	SW	3	d4		0	0.917431192660551	0	13.7614678899083	0	0	0	0	0	0	0	0	0	9.1743119266055	0	4.58715596330275	0	2.75229357798165	0	0	0	0	0	0	0	0	0	0	0	0	0	0	0	0	9.1743119266055	0	0	0	0	32.1100917431193	0	0	9.1743119266055	0	0
2011/12/18	SW	4	d1		0	0	4.95049504950495	14.8514851485149	0	0	0	0	0	0.99009900990099	0	0	0	0	0	0	0	0	0	0	0	0	0	0	0	0	0	0	0	0	0	0	9.9009900990099	0	9.9009900990099	0	0	0	0	14.8514851485149	4.95049504950495	0	0	0	4.95049504950495
2011/12/18	SW	4	d2		0	2.06185567010309	0	10.3092783505155	0	0	0	0	0	1.03092783505155	0	0	0	0	0	0	0	0	0	0	0	0	0	0	0	0	0	0	0	0	0	0	5.15463917525773	0	10.3092783505155	0	0	0	0	20.6185567010309	2.06185567010309	0	0	0	0
2011/12/18	SW	4	d3		0	0	1.8018018018018	4.5045045045045	0	0	0	0	0	0	0	0	0	0	0	0	0	0	0	0	0	0	0	0	0	0	0	0	0	0	0	0	0	0	9.00900900900901	0	0	0	0	27.027027027027	0	0	4.5045045045045	0	0
2011/12/18	SW	4	d4		0	0.934579439252336	0	0	0	0	0	0	0	1.86915887850467	0	0	0	1.86915887850467	0	0	0	4.67289719626168	0	0	0	0	0	0	0	0	0	0	0	0	0	0	0	0	9.34579439252336	0	0	0	0	28.0373831775701	1.86915887850467	0	9.34579439252336	0	0
2011/12/18	SE	1	d1		0	0	1.8348623853211	13.7614678899083	0	0	0	0	0	1.8348623853211	0	7.3394495412844	0	0	0	1.8348623853211	0	9.1743119266055	0	0	0	0	0	0	0	0	0	0	0	0	0	0	0	0	9.1743119266055	0	0	0	0	4.58715596330275	9.1743119266055	0	0	0	0
2011/12/18	SE	1	d2		0	0.980392156862745	0.980392156862745	14.7058823529412	0	0	0	0	0	0	0	4.90196078431373	0	0	0	0	0	9.80392156862745	0	0	0	0	0	0	0	0	0	0	0	0	0	0	0	0	4.90196078431373	0	0	0	0	4.90196078431373	9.80392156862745	0	0	0	0
2011/12/18	SE	1	d3		0	1.76991150442478	2.65486725663717	4.42477876106195	0	0	0	0	0	0.884955752212389	0	4.42477876106195	0	0	0	4.42477876106195	0	17.6991150442478	0	0	0	0	0	0	0	0	0	0	0	0	0	0	0	0	4.42477876106195	0	0	0	0	4.42477876106195	8.84955752212389	0	0	0	0
2011/12/18	SE	1	d4		0	0	0	10	0	0	0	0	0	0	0	5	0	0	0	5	0	10	0	0	0	0	0	0	0	0	0	0	0	0	0	0	0	0	5	0	0	0	0	0	20	0	10	0	5
2011/12/18	SE	2	d1		0	0.925925925925926	0	13.8888888888889	0	0	0	0	0	1.85185185185185	0	18.5185185185185	0	0	0	0	0	9.25925925925926	0	0	0	0	0	0	0	0	0	0	0	0	0	0	0	0	9.25925925925926	0	0	0	0	4.62962962962963	4.62962962962963	0	0	0	0
2011/12/18	SE	2	d2		0	0	0	10.752688172043	0	0	0	0	0	1.0752688172043	0	32.258064516129	0	0	0	0	0	2.1505376344086	0	0	0	0	0	0	0	0	0	0	0	0	0	0	0	0	10.752688172043	0	0	0	0	5.37634408602151	0	0	0	0	10.752688172043
2011/12/18	SE	2	d3		0	0.847457627118644	1.69491525423729	12.7118644067797	0	0	0	0	0	1.69491525423729	0	25.4237288135593	0	0	0	0	0	0.847457627118644	0	0	0	0	0	0	0	0	0	0	0	0	0	0	0	0	8.47457627118644	0	0	0	0	4.23728813559322	8.47457627118644	0	1.69491525423729	0	0
2011/12/18	SE	2	d4		0	1.98019801980198	0	14.8514851485149	0	0	0	0	0	0	0	39.6039603960396	0	0	0	1.98019801980198	0	1.98019801980198	0	0	0	0	0	0	0	0	0	0	0	0	0	0	0	0	4.95049504950495	0	0	0	0	0	9.9009900990099	0	0	0	0
2011/12/18	SE	3	d1		0	0	2.32558139534884	3.48837209302326	0	0	0	0	0	0	0	11.6279069767442	0	0	0	1.16279069767442	0	1.16279069767442	0	0	0	2.32558139534884	0	0	0	0	0	0	0	0	0	0	0	0	5.81395348837209	0	0	0	0	5.81395348837209	0	0	2.32558139534884	0	11.6279069767442
2011/12/18	SE	3	d2		0	1.88679245283019	0	4.71698113207547	0	0	0	0	0	0	0	28.3018867924528	0	0	0	0	0	6.60377358490566	0	0	0	0	0	0	0	0	0	0	0	0	0	0	0	0	9.43396226415094	0	0	0	0	0	1.88679245283019	0	0	0	4.71698113207547
2011/12/18	SE	3	d3		0	0	1.76991150442478	0	0	0	0	0	0	0.884955752212389	0	22.1238938053097	0	0	0	0.884955752212389	0	13.2743362831858	0	0	0	0	0	0	0	0	0	0	0	0	0	0	0	0	4.42477876106195	0	0	0	0	1.76991150442478	0	0	1.76991150442478	0	0
2011/12/18	SE	3	d4		0	1.81818181818182	0	4.54545454545455	0	0	0	0	0	0	0	27.2727272727273	0	0	0	0.909090909090909	0	7.27272727272727	0	0	0	0	0	0	0	0	0	0	0	0	0	0	0	0	4.54545454545455	0	0	0	0	1.81818181818182	4.54545454545455	0	1.81818181818182	0	0
2011/12/18	SE	4	d1		0	0	0	5.05050505050505	0	0	0	0	0	0	0	5.05050505050505	0	0	0	0	0	10.1010101010101	0	0	0	0	0	0	0	0	0	0	0	0	0	0	0	0	5.05050505050505	0	0	0	0	5.05050505050505	10.1010101010101	0	2.02020202020202	0	0
2011/12/18	SE	4	d2		0	0.99009900990099	0	9.9009900990099	0	0	0	0	0	0.99009900990099	0	19.8019801980198	0	0	0	0	0	9.9009900990099	0	0	0	0	0	0	0	0	0	0	0	0	0	0	0	0	4.95049504950495	0	0	0	0	0	9.9009900990099	0	1.98019801980198	0	0
2011/12/18	SE	4	d3		0	1.01010101010101	1.01010101010101	5.05050505050505	0	0	0	0	0	0	0	10.1010101010101	0	0	0	5.05050505050505	0	10.1010101010101	0	0	0	0	0	0	0	0	0	0	0	0	0	0	0	0	5.05050505050505	0	0	0	0	5.05050505050505	10.1010101010101	0	2.02020202020202	0	0
2011/12/18	SE	4	d4		0	0	2.32558139534884	23.2558139534884	0	0	0	0	0	0	0	17.4418604651163	0	0	0	1.16279069767442	0	2.32558139534884	0	0	0	0	0	0	0	0	0	0	0	0	0	0	0	0	5.81395348837209	0	0	0	0	5.81395348837209	5.81395348837209	0	1.16279069767442	0	0
[truncated: 25 more columns]
